# Supplementary material
Source: PubMed Central journal article supplement (PMC3065206)
Supplement: NIHMS280914-supplement-1.pdf [file NIHMS280914-supplement-1.pdf]

## **Supplementary Information**

### **Identification of lysine succinylation as a new post-translational modification**

Zhihong Zhang<sup>1,2</sup>, Minjia Tan<sup>1,2</sup>, Zhongyu Xie<sup>1</sup>, Lunzhi Dai<sup>1</sup>, Yue Chen<sup>1</sup>, Yingming Zhao<sup>1\*</sup>

<sup>1</sup>: Ben May Department for Cancer Research, The University of Chicago, Chicago, IL 60637

<sup>2</sup>: These authors contributed equally to this work.

## Supplementary Methods

### Purification of recombinant proteins from *E. coli* and *S. cerevisiae*

*E. coli* cells expressing a His-tagged protein of interest were obtained from ASKA library<sup>1</sup>. The cells were grown in LB medium (0.5% yeast extract (w/v), 1% tryptone (w/v), 1% NaCl (w/v)) at 37 °C on a rotary shaker (250 rpm). When cultures reached an OD<sub>600</sub> of 0.7- 0.8, cells were induced by isopropyl-β-d-thiogalactoside (IPTG) (a final concentration of 0.01 mM) for 4 hrs at 30 °C. The cells were harvested by centrifugation at 5,000 × g for 10 min and resuspended in cold lysis buffer (10 mM NaH<sub>2</sub>PO<sub>4</sub>, 300 mM NaCl, 10 mM imidazole, pH 8.0). The cells were broken by 4 cycles of sonication employing 10-second bursts at 200–300 W followed by a 30-second cooling period between each burst. After the removal of cell debris, the supernatant was incubated with Ni-NTA agarose beads at 4 °C for 1 hr with gentle rotation. The Ni-NTA beads were then pelleted by centrifugation and washed three times with a washing buffer (10 mM NaH<sub>2</sub>PO<sub>4</sub>, 300 mM NaCl, 20 mM imidazole, pH 8.0). The His-tagged protein was eluted from the beads with an elution buffer (10 mM NaH<sub>2</sub>PO<sub>4</sub>, 300 mM NaCl, 250 mM imidazole, pH 8.0). The GST-fused glycerol-3-phosphate dehydrogenase (GAPDH) of *Saccharomyces cerevisiae* was purified by affinity chromatography.

### Protein in-gel tryptic digestion

The gel band was washed with 50% ethanol for 1 hr, followed by a second, overnight washing. The destained gel band was washed with water twice and was cut into small pieces. The gel pieces were reduced with 10 mM dithiothreitol at 56 °C for 1 hr and alkylated with 55 mM iodoacetamide at room temperature in the dark for 45 min. Three hundred nanograms of trypsin in 50 mM ammonium bicarbonate was added to the gels and incubated overnight at 37 °C. Tryptic peptides were sequentially extracted from the gel pieces with 50% acetonitrile (acetonitrile/water/TFA, 50:45:5, v/v/v) and 75% acetonitrile (acetonitrile/water/TFA, 75:24:1, v/v/v). The peptide extracts were pooled, dried in a SpeedVac, and desalted using a  $\mu$ -C18 ZipTip prior to HPLC/MS/MS analysis.

### **Circular dichroism (CD) spectroscopic analysis**

The CD spectra of the wild type, K100R and K100E mutants were measured with an AVIV model 202 CD spectrometer (Aviv Biomedical, Lakewood, NJ). Spectra were collected over a wavelength range of 190 – 260 nm using 1-nm step spacing. A final concentration of 20  $\mu$ M (in 50 mM sodium phosphate buffer containing 50 mM sodium chloride, pH 8.0) of each sample was used for CD analysis. In each experiment, 3 scans were averaged per sample for enhanced signal-to-noise ratio. All the data were acquired at 24 °C in a 0.1-cm path length quartz cuvette, and were analyzed using the Globalworks software (Olis, Inc., Bogart, GA). The secondary structures of the proteins were calculated from the

corresponding CD spectra using the CONTINLL algorithm (with basis set number 10).

## Supplementary Results:

**Supplementary Figure 1.** Three His-tagged proteins, isocitrate dehydrogenase (Icda), GADPH (GapA) and serine hydroxymethyltransferase (GlyA), isolated and resolved by SDS-PAGE and stained by Coomassie blue staining.

**Supplementary Figure 2.** MS/MS Spectra of *in vivo*, synthetic FTEGAF<sup>Succ</sup>KDWGYQLAR, and their mixture. (a) MS/MS spectrum of FTEGAF<sup>Succ</sup>KDWGYQLAR from isocitrate dehydrogenase led to the identification of a mass shift of 100.0186 Da at its lysine residue. Inset shows its precursor ion mass. The label  $\Delta$  designates b or y ions with water and/or ammonia loss. (b) MS/MS spectrum of the synthetic peptide corresponding to the sequence identified in (a) with lysine succinylation. (c) MS/MS spectrum of a peptide mixture of the *in vivo*-derived isocitrate dehydrogenase tryptic peptides and its synthetic counterpart as indicated in (b).

**Supplementary Figure 3.** MS/MS Spectra of synthetic methylmalonyllysine peptide, FTEGAF<sup>MeMal</sup>KDWGYQLAR. Inset shows its precursor ion mass. The label  $\Delta$  designates b or y ions with water and/or ammonia loss.

**Supplementary Figure 4.** MS/MS Spectra of *in vivo* and synthetic GGSEELY<sup>Succ</sup>KK, and their mixture. MS/MS spectrum of GGSEELY<sup>Succ</sup>KK from serine hydromethyltransferase. The label  $\Delta$  designates b or y ions with water and/or ammonia loss. (b) MS/MS spectrum of the synthetic peptide

corresponding to the sequence identified in (a) with lysine succinylation. (c) MS/MS spectrum of a mixture of the *in vivo*-derived tryptic peptides and its synthetic counterpart as indicated in (b).

**Supplementary Figure 5.** Mass spectrometric identification and verification of NLTG<sup>Succ</sup>KEADAALGR from serine hydromethyltransferase. (a) MS/MS spectrum of a doubly charged tryptic peptide (NLTGKEADAALGR) from serine hydromethyltransferase led to the identification of a mass shift of 100.0057 Da at its lysine residue. Inset shows its precursor ion mass. The label  $\Delta$  designates b or y ions with water and/or ammonia loss. (b) MS/MS spectrum of the synthetic peptide corresponding to the sequence identified in (a) with lysine succinylation. (c) MS/MS spectrum of a peptide mixture of the *in vivo*-derived tryptic peptides and its synthetic counterpart as indicated in (b). (d) Extracted ion chromatogram (XIC) of the *in vivo*-derived peptide. (e) XIC of the synthetic peptide corresponding to the sequence identified in (a) bearing lysine succinylation, showing a similar retention time. (f) XIC of a mixture of the peptide from *in vivo*-derived tryptic peptides and its synthetic counterpart as indicated in (b), showing coelution of the two peptides from an HPLC column.

**Supplementary Figure 6.** Mass spectrometric identification and verification of a lysine succinylated peptide from glyceraldehyde-3-phosphate dehydrogenase (GADPH). (a) MS/MS spectrum of a doubly charged tryptic peptide (GASQNIIPSSTGAAKAVGK) from GADPH led to the identification of a mass shift

of 100.0176 Da at its lysine residue. Inset shows its precursor ion mass. The label  $\Delta$  designates b or y ions with water and/or ammonia loss. (b) MS/MS spectrum of the synthetic peptide corresponding to the sequence identified in (a) with lysine succinylation. (c) MS/MS spectrum of a peptide mixture of the *in vivo*-derived tryptic peptides and its synthetic counterpart as indicated in (b). (d) Extracted ion chromatogram (XIC) of the *in vivo*-derived peptide. (e) XIC of the synthetic peptide corresponding to the sequence identified in (a) bearing lysine succinylation. (f) XIC of a mixture of the peptide from *in vivo*-derived tryptic peptides and its synthetic counterpart as indicated in (b).

**Supplementary Figure 7.** Isocitrate dehydrogenase sequence annotation (Uniprot ID P08200). The information was obtained from Uniprot database (<http://www.uniprot.org/>). K100 and K242 are succinylated, but they are not known to be directly involved in substrate binding, catalysis or NADP binding in *E. coli*.

**Supplementary Figure 8.** Multiple sequence alignment, sequence annotation, and localization of the succinyllysines in serine hydroxymethyltransferase. (a) ClustalW (2.0.12) alignment of serine hydroxymethyltransferase homologs from *H. sapiens* (gi: 703093), *M. musculus* (gi: 74141789), *D. melanogaster* (gi: 24640005), *C. elegans* (gi: 25144732), *A. thaliana* (gi: 14030719), *S. cerevisiae* (gi: 408368) and *E. coli* (gi: 170082161). Conserved sites are shaded with gray and black. Conserved and non-conserved succinyllysine residues are indicated

by red and blue triangles, respectively. The positions are labeled corresponding to the *E. coli* sequence. (b) Serine hydroxymethyltransferase sequence annotation (Uniprot ID P0A825). The information was obtained from Uniprot database (<http://www.uniprot.org/>). Both lysine succinylation and lysine acetylation sites were indicated. K250 are also reported to be acetylated. (c) Localization of the succinyllysines and functional sites in serine hydroxymethyltransferase. The 3-D structure was obtained from the MMDB (MMDB id 77977) and viewed by Cn3D (v4.1). Succinylated and known functionally important sites are indicated by red and yellow arrows, respectively. The superscripts FS and SUCC on the labeled residues refer to functionally important residues and succinylated residues, respectively. (d) Localization of the succinyllysines and functional sites in serine hydroxymethyltransferase. The 3-D structure was visualized from another side from (c). All of the succinylated sites (K62, K242, K250, 277, 293, 331, 346, and 354) are more than 5 angstroms away from the major functional residues (R235 and Y55), which has been reported to be important for substrate binding.<sup>2</sup> Succinylated lysines are predominantly located in the loops and alpha helices.

**Supplementary Figure 9.** Multiple sequence alignment, sequence annotation, and localization of the succinyllysines in glyceraldehyde-3-phosphate dehydrogenase A. (a) ClustalW (2.0.12) alignment of glyceraldehyde-3-phosphate dehydrogenase A homologs from *H. sapiens* (gi: 7669492), *M. musculus* (gi: 149259607), *D. melanogaster* (gi: 22023983), *C. elegans* (gi:



17568413), *A. thaliana* (gi: 21618027), *S. cerevisiae* (gi: 6322409) and *E. coli* (gi: 170081435). Conserved sites are shaded with gray and black. Conserved and non-conserved succinyllysine residues are indicated by red and blue triangles, respectively. The positions are labeled corresponding to the *E. coli* sequence. Seven out of the eleven of these sites are highly conserved among the species investigated. (b) Glyceraldehyde-3-phosphate dehydrogenase A sequence annotation (Uniprot ID P0A9B2). The information was obtained from Uniprot database (<http://www.uniprot.org/>). (c) Localization of the succinyllysines and functional sites in glyceraldehyde-3-phosphate dehydrogenase A. The 3-D structure of O-P dimer of the protein was obtained from the MMDB (MMDB ID 4433) and viewed by Cn3D (v4.1). Succinylated and known functionally important sites (Uniprot ID P0A9B2) are labeled on the O-subunit and indicated by red and yellow arrows, respectively. The superscripts SB, NB, CAT and SUCC on the labeled residues refer to substrate binding, NAD binding, catalytic sites and succinylated lysine residues, respectively. (d) Localization of the succinyllysines and functional sites in glyceraldehyde-3-phosphate dehydrogenase A. The 3-D structure was visualized from another side from (c). These succinylated lysines are predominantly located in the loops and alpha helices. None of the succinylated sites (K115, 124, 132, 192, 213, 217, 225, 249, 257, 261 and 331) are close (> 5 angstroms) to known major functional important residues, which suggests they are less likely to have direct interaction with them.

**Supplementary Figure 10. Circular dichroism (CD) spectrum of wild type,**

## **K100R and K100E mutants of isocitrate dehydrogenase.**

**Supplementary Figure 11.** Mascot-annotated MS/MS spectrum of VLPELQG<sup>Succ</sup>KLTGMAFR identified from yeast glyceraldehyde-3-phosphate dehydrogenase.

**Supplementary Figure 12.** Differential succinyllysine profiles in cancer cell lines. Western blotting analysis (left panel) and Ponceau S staining of protein whole-cell lysate (right panel) of cancer cell lines. Total cellular extract (30 µg/lane) was resolved in Tris-Glycine 4% - 20% gradient gel. *Lane 1*, HeLa, adenocarcinoma; *lane 2*, HCT116, colorectal carcinoma; *lane 3*, A549, lung carcinoma; *lane 4*, A375, skin melanoma; *lane 5*, HepG2, hepatocellular carcinoma; *lane 6*, MG-63, osteosarcoma; *lane 7*, Du145, brain carcinoma; *lane 8*, MDA-MB-231, adenocarcinoma ; *lane 9*, HEK293T, human embryonic kidney cells. Red arrows indicate those proteins that have different levels of lysine succinylation.

**Supplementary Figure 13.** HPLC analysis (extracted ion chromatogram) and purity of synthetic peptides. All the targeted peptides can be unambiguously identified based on their MS/MS spectra.

**Supplementary Table 1.** A list of H<sub>4</sub> and D<sub>4</sub>-labeled succinyllysine peptide sequences identified from D<sub>4</sub>-succinate treated *E. coli* sample.

**Supplementary Table 2.** Primers used for site-specific mutagenesis.

**Supplementary Table 3.** A list of *E. coli* succinyllysine peptide sequences identified by affinity purification using anti-succinyllysine pan antibody and mass spectrometry.

**Supplementary Data 1.** MS/MS spectra for H<sub>4</sub> and D<sub>4</sub>-labeled succinyllysine peptide sequences identified from D<sub>4</sub>-succinate treated *E. coli* sample.

**Supplementary Data 2.** MS/MS spectra of succinyllysine peptides identified by affinity purification using anti-succinyllysine pan antibody and mass spectrometry.

#### **SUPPLEMENTARY REFERENCES:**

1. Kitagawa, M. et al. Complete set of ORF clones of *Escherichia coli* ASKA library (a complete set of *E. coli* K-12 ORF archive): unique resources for biological research. *DNA Res* 12, 291-299 (2005)
2. Vivoli, M. et al. Role of a conserved active site cation- $\pi$  interaction in *Escherichia coli* serine hydroxymethyltransferase. *Biochemistry* 48, 12034-12046 (2009).

# Supplementary Figure 1:

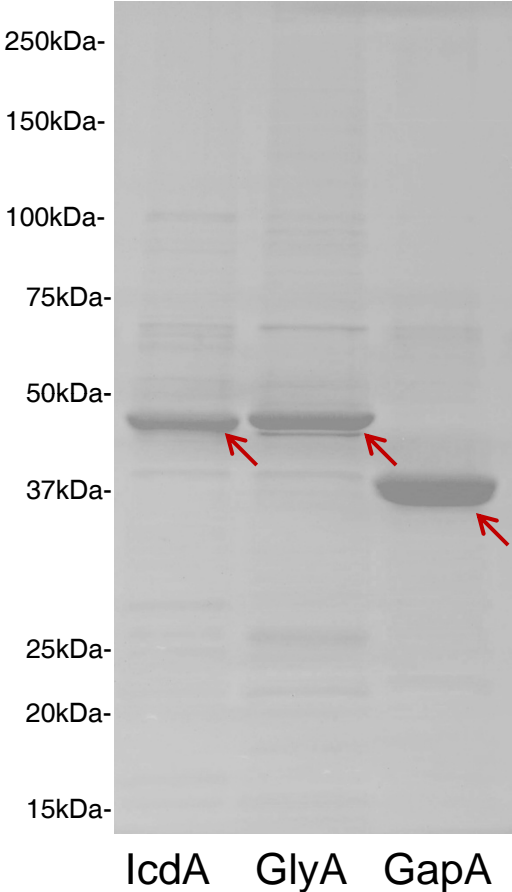

## Supplementary Figure 2:

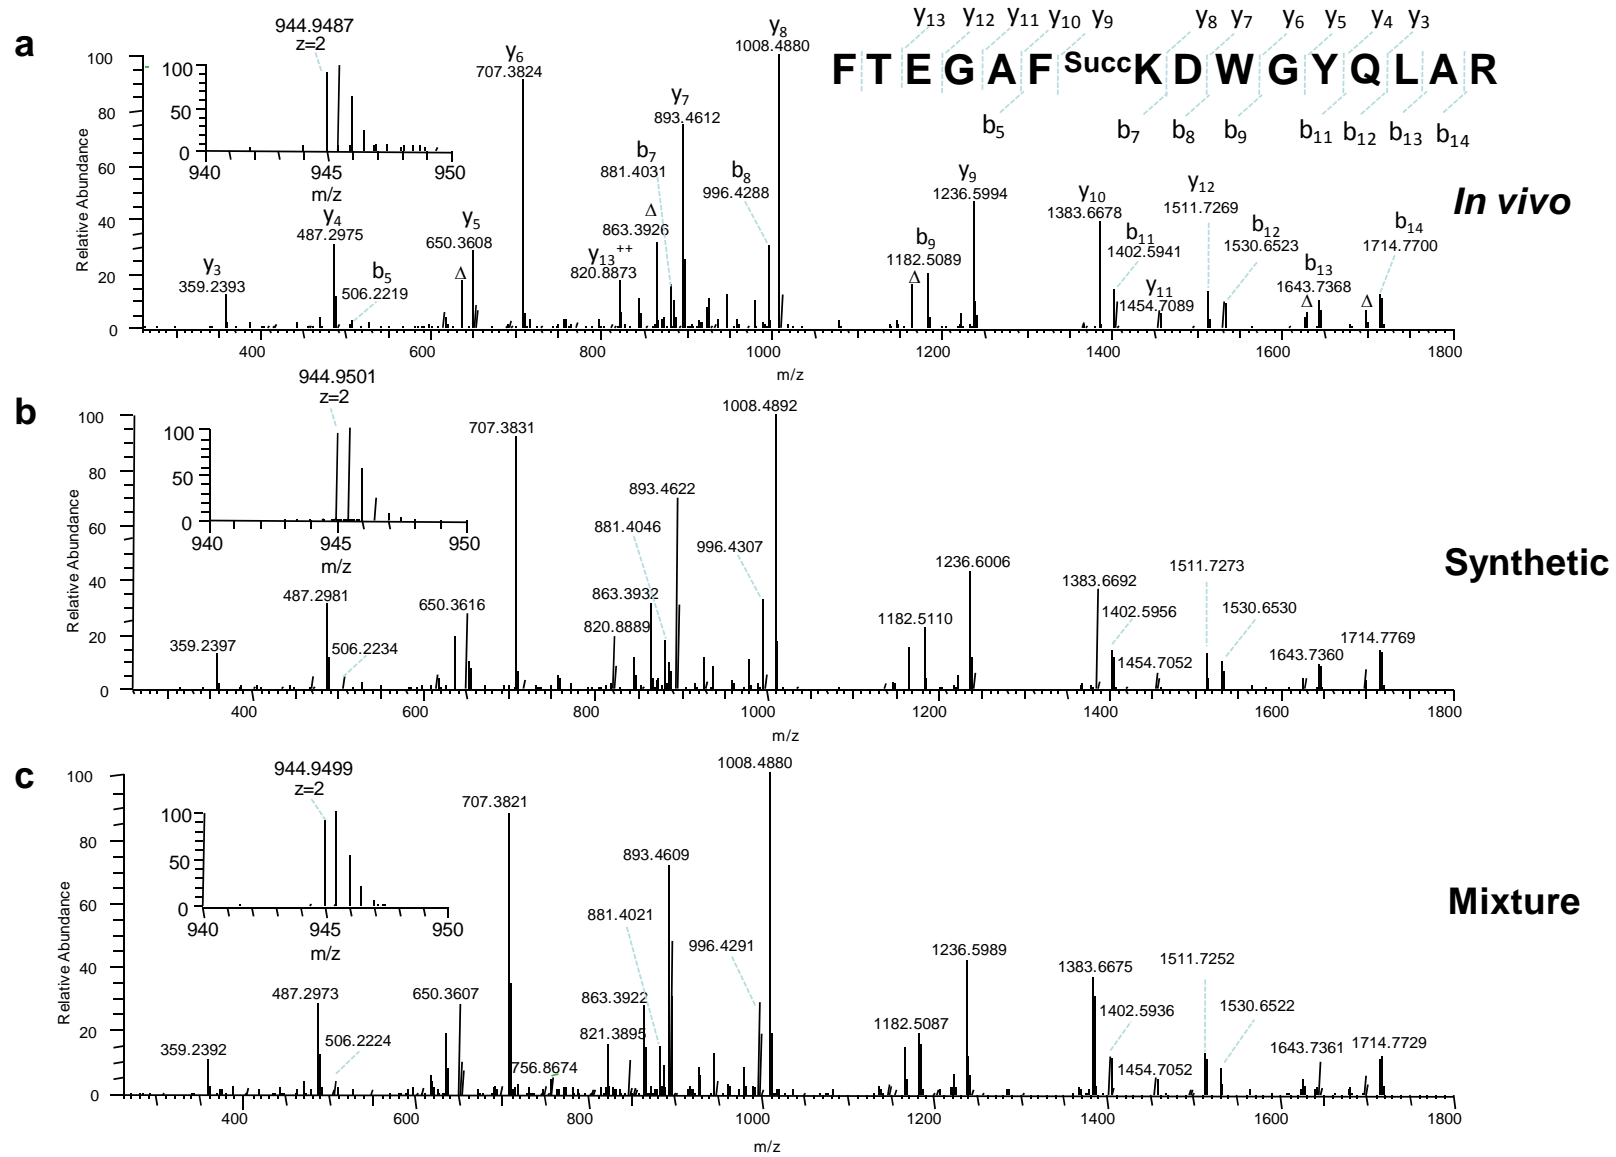

### Supplementary Figure 3:

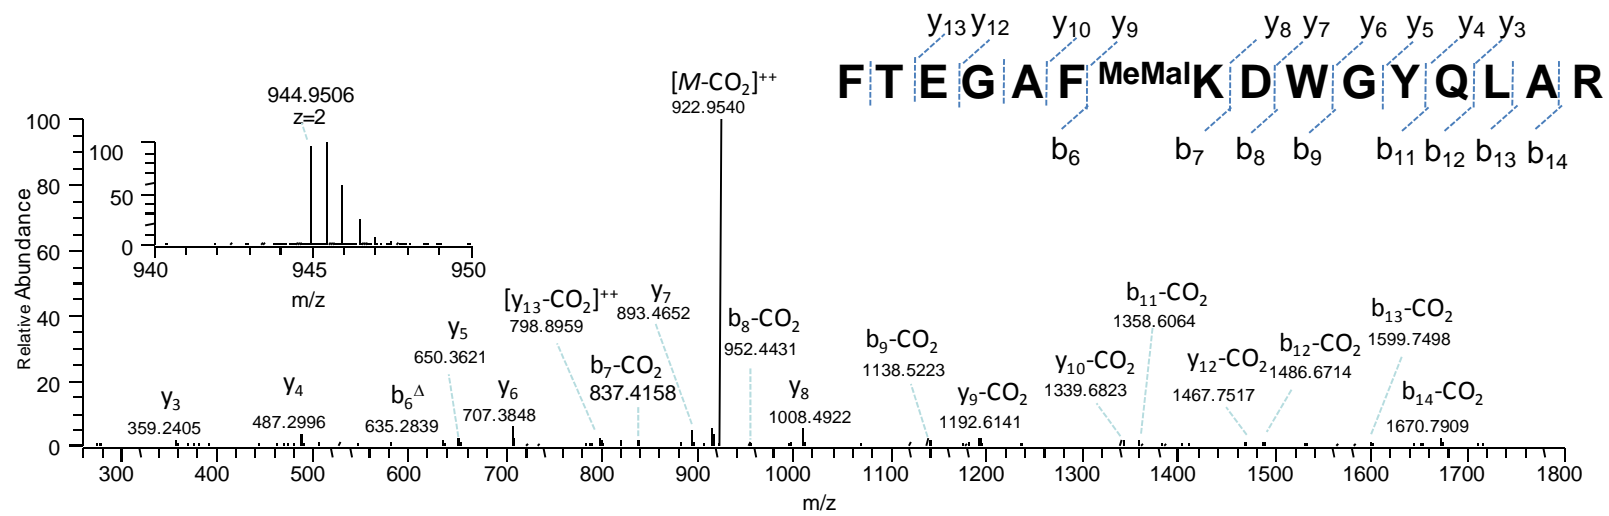

# Supplementary Figure 4:

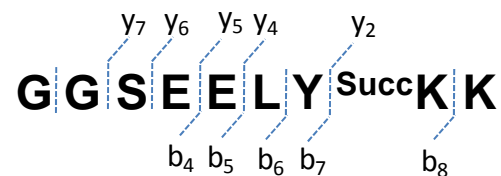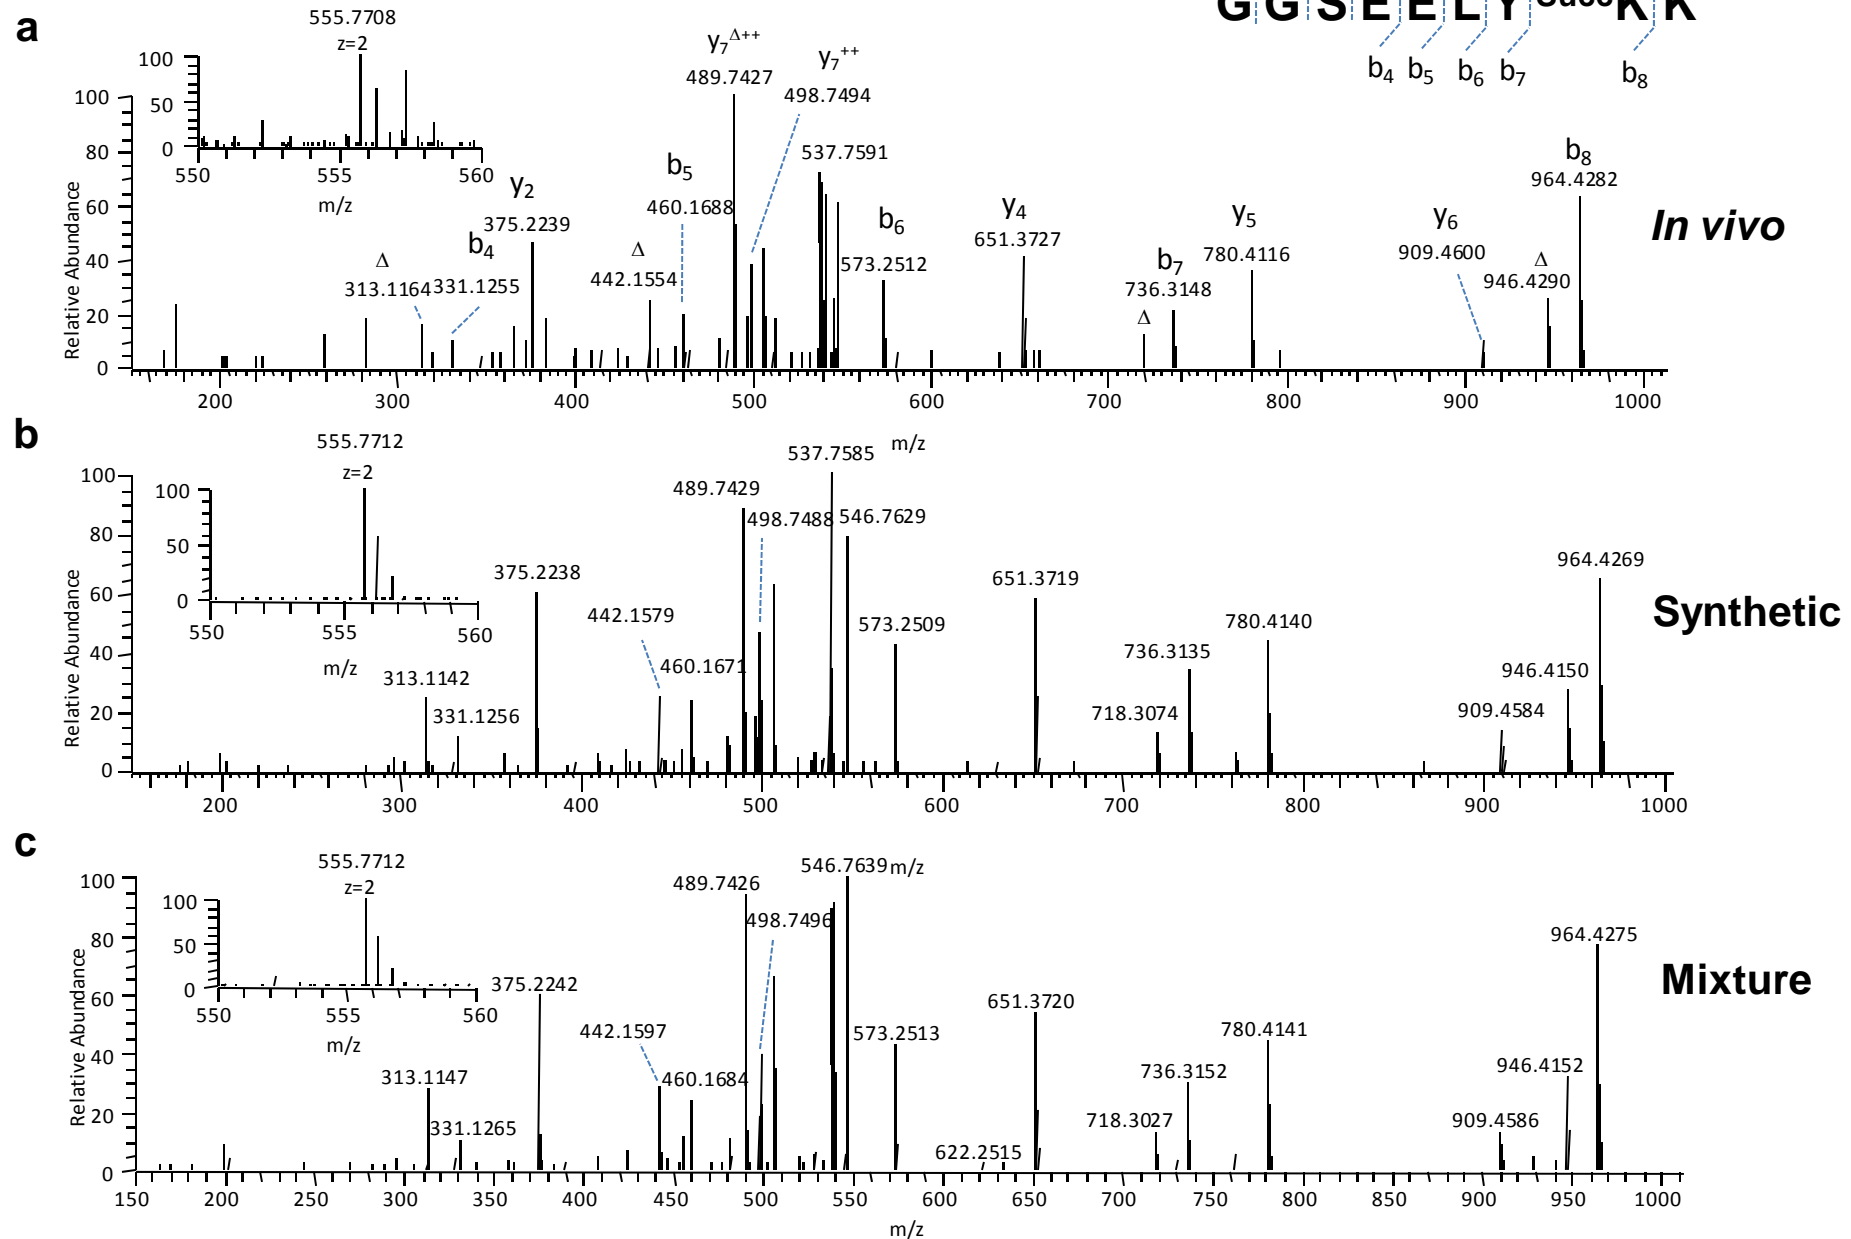

# Supplementary Figure 5:

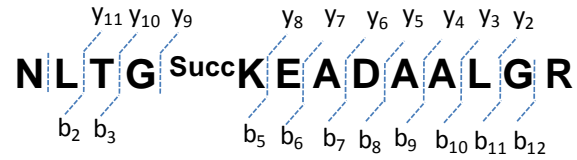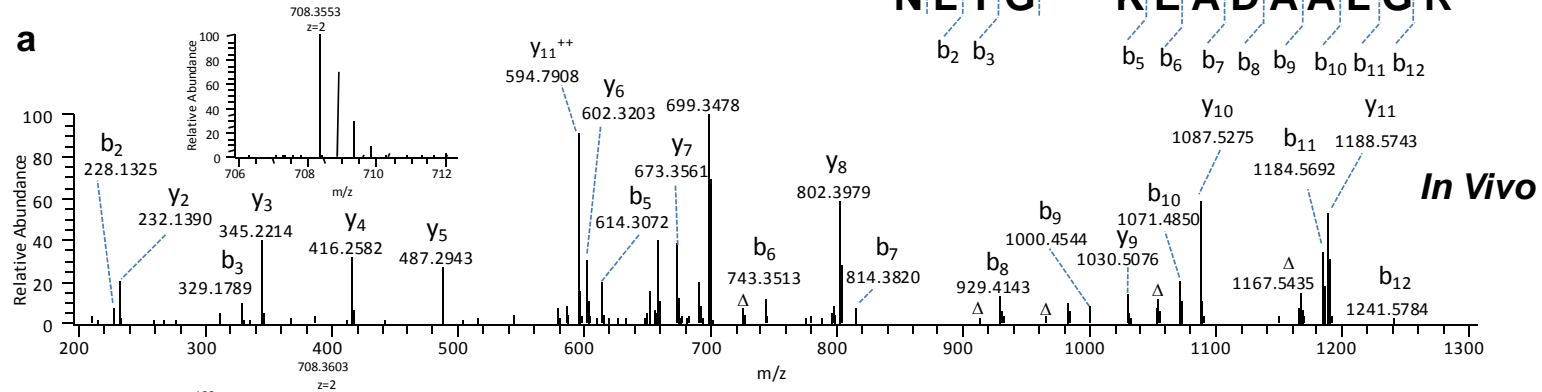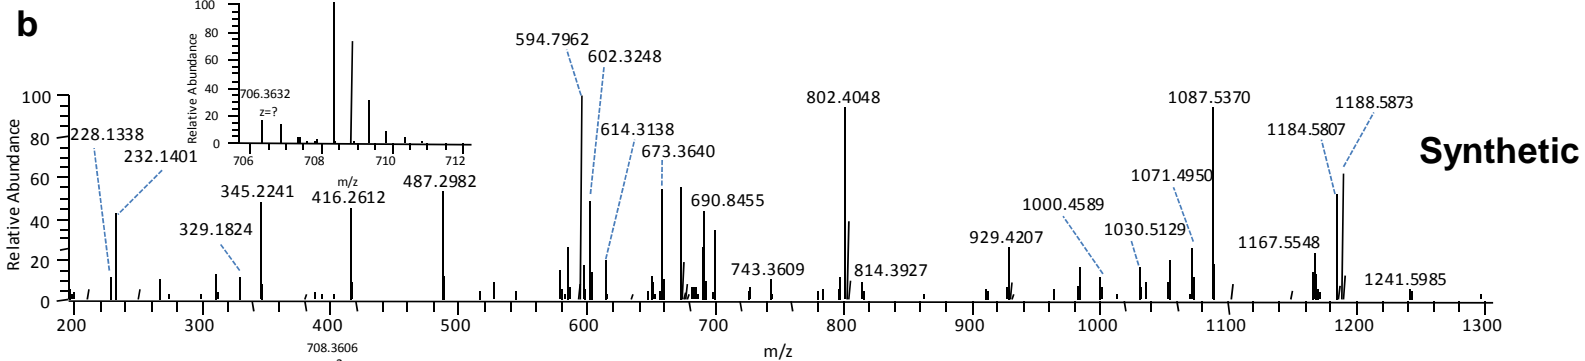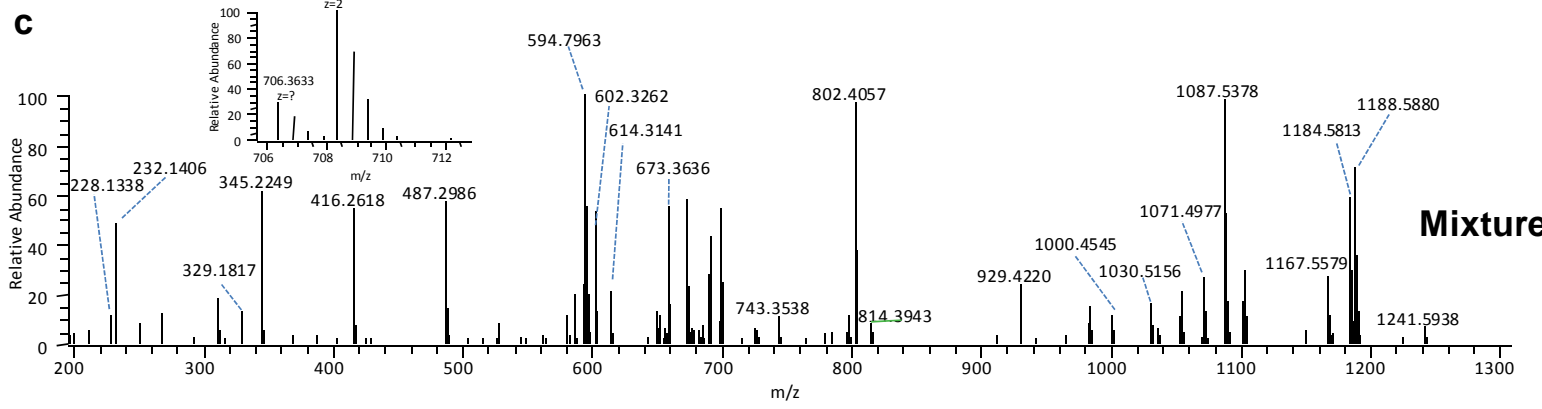



## Supplementary Figure 5:

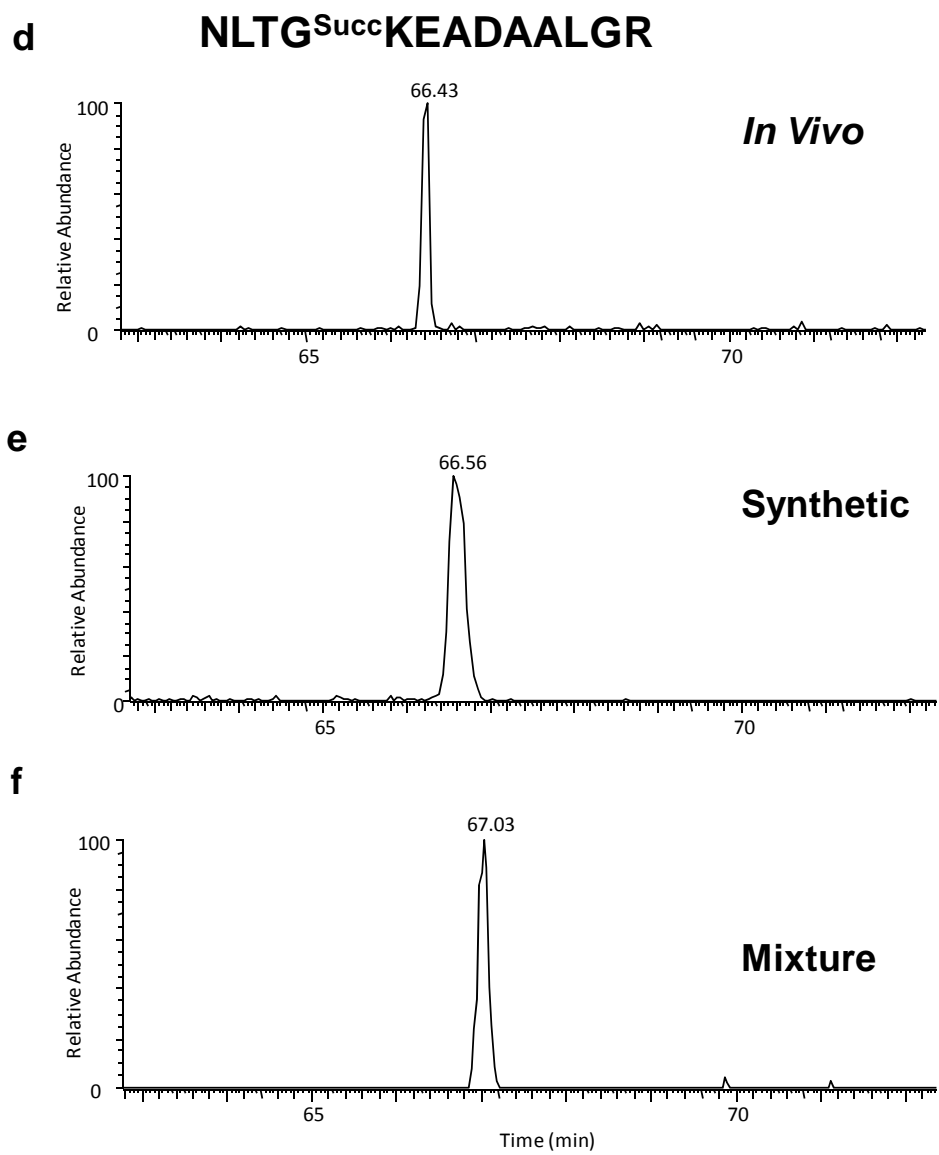

# Supplementary Figure 6:

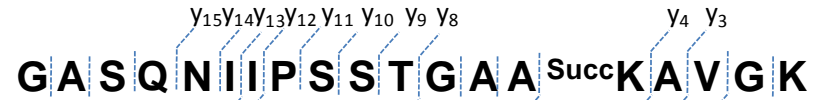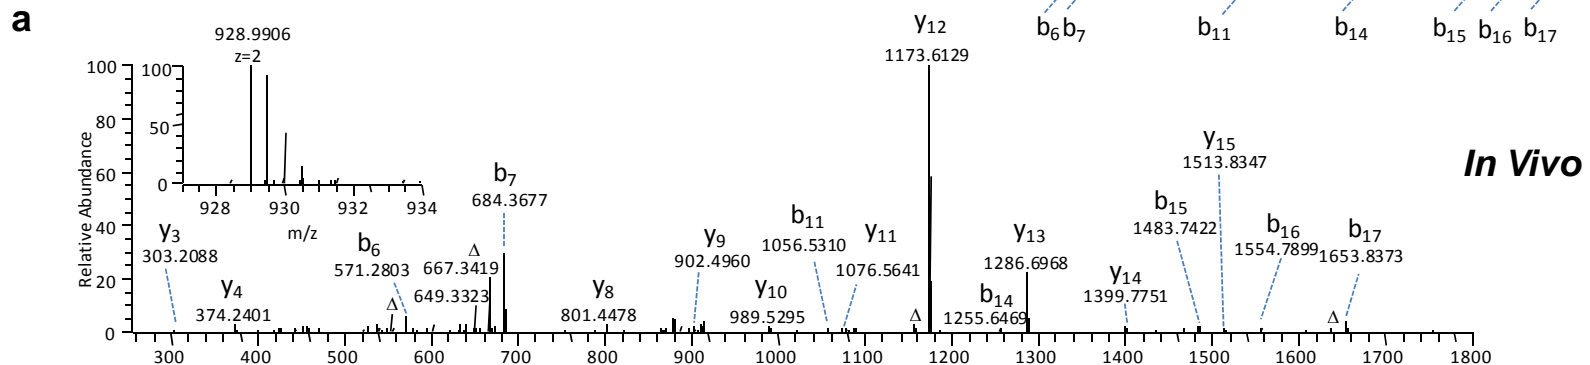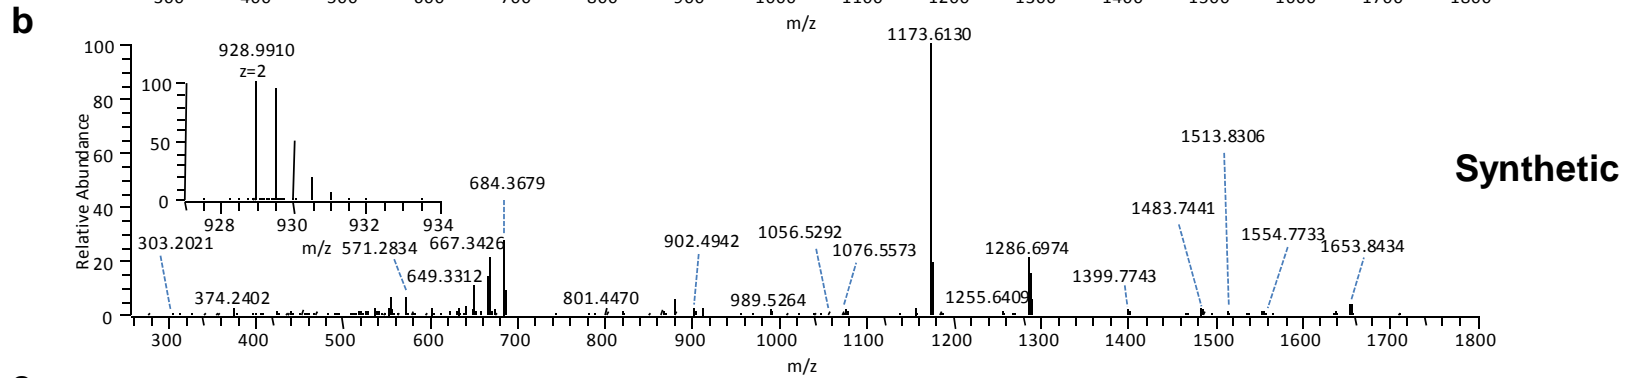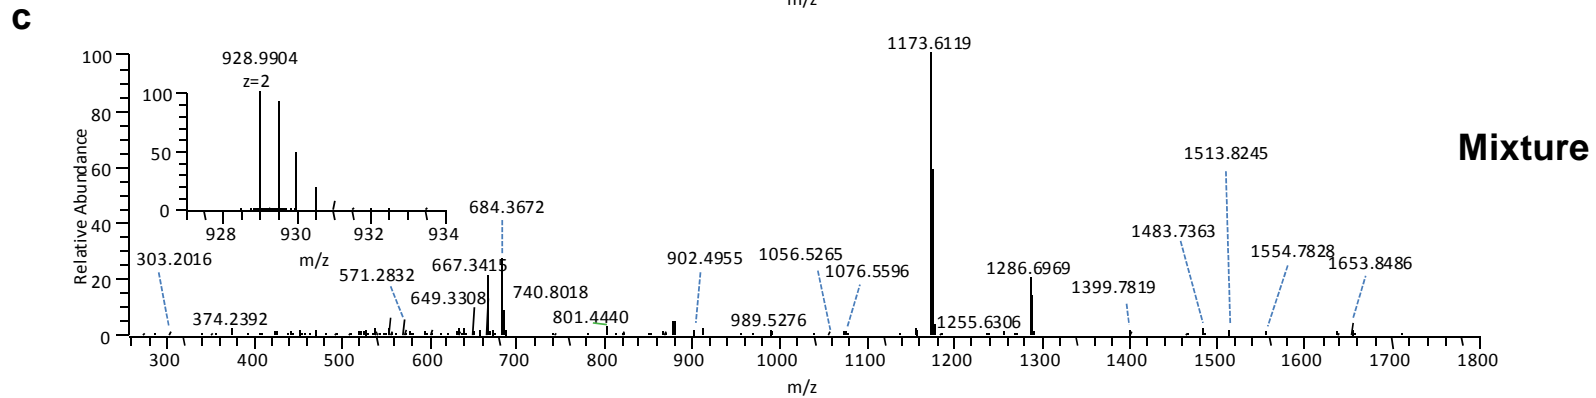

## Supplementary Figure 6:

**d** *In Vivo*

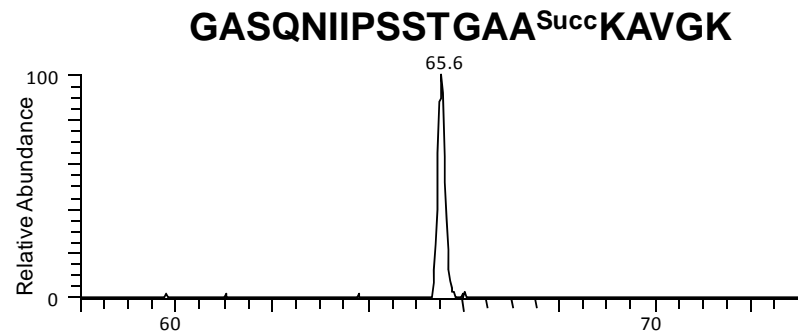

**e** Synthetic

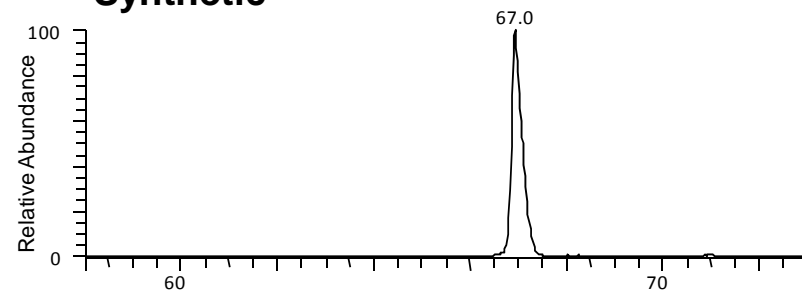

**f** Mixture

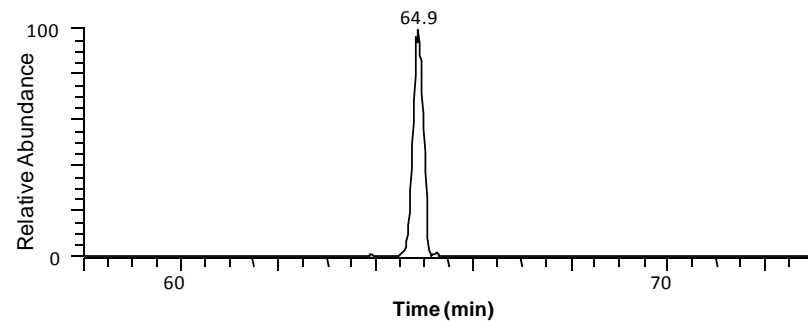

# Supplementary Figure 7:

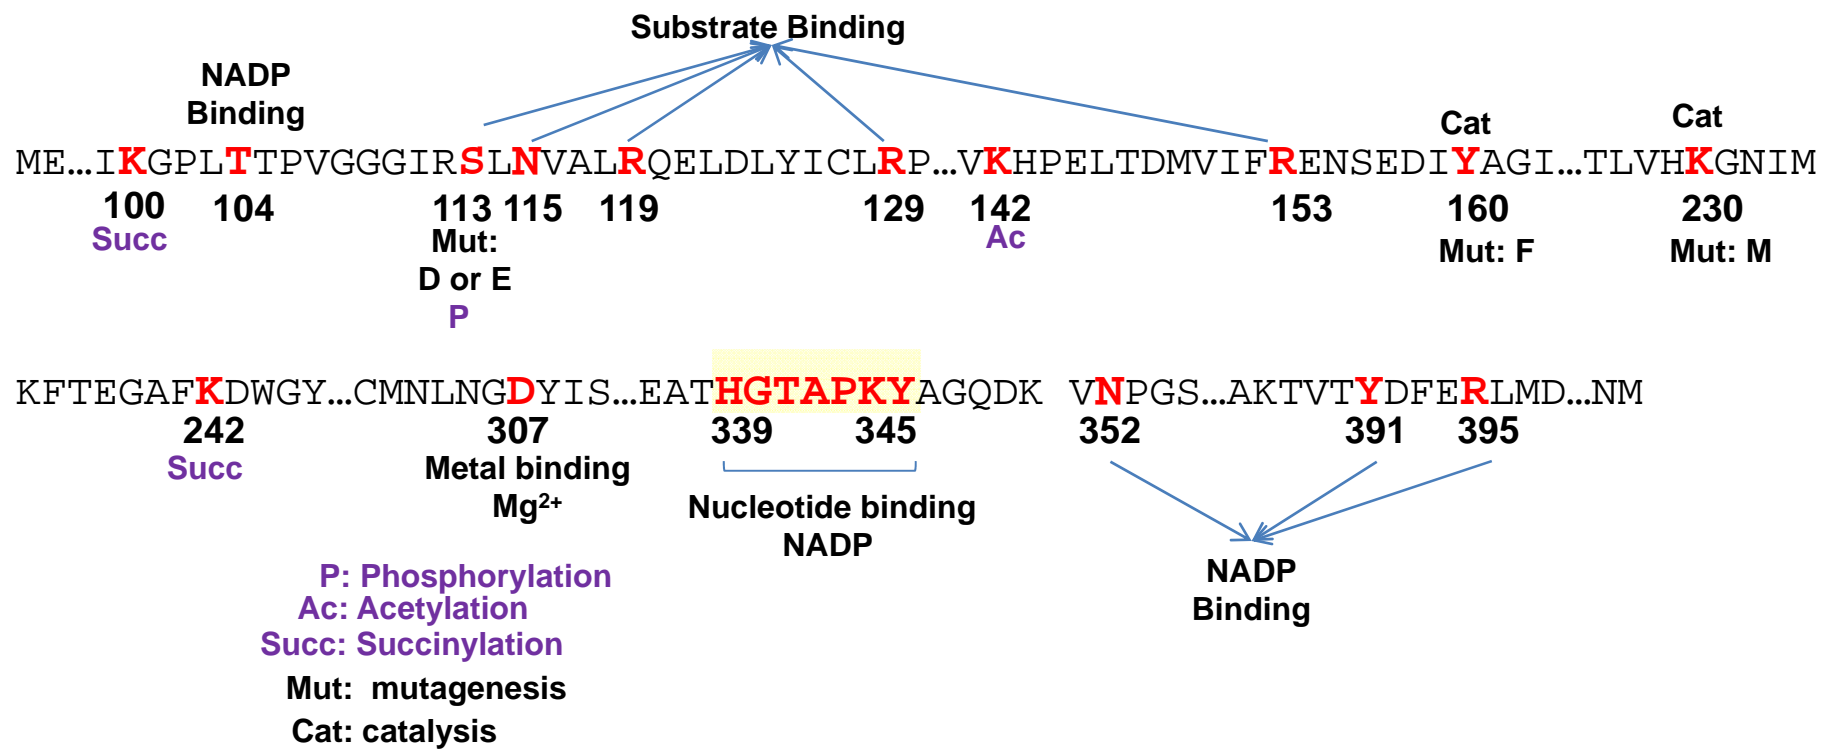

## Supplementary Figure 8:

### a Serine hydroxymethyltransferase

|                        |                                                      |
|------------------------|------------------------------------------------------|
| <i>H. sapiens</i>      | NKYSEGYPGKRYYG::LIFYRKG::FEDRINFAVF::AVALKQACTPMFREY |
| <i>M. musculus</i>     | NKYSEGYPGKRYYG::LIFYRKG::FEDRINFAVF::AVALKQACTPMFREY |
| <i>D. melanogaster</i> | NKYSEGYPGKRYYG::VIFFRKG::LEERINQAVF::ATAFKQAKSPEFKAY |
| <i>C. elegans</i>      | NKYSEGYPGARYYG::LIFYRKG::LEEKINSAVF::AVALRQCLSEDFVQY |
| <i>A. thaliana</i>     | NKYSEGLPGKRYYG::MIFFRK-::LESAVNNAVF::AVCLKHAQSPEFKAY |
| <i>S. cerevisiae</i>   | NKYSEGYPGERYYG::MIFFRKG::LEKKINFSVF::AVALKQAMSPEFKAY |
| <i>E. coli</i>         | NKYAEGYPGKRYYG::LILAKGG::LYKKLNSAVF::AVALKEAMEPEFKTY |

62

242

250

277

|                        |                                                        |
|------------------------|--------------------------------------------------------|
| <i>H. sapiens</i>      | VLKNARAMADALLERGY::LDGARAERVLELVSITANKNTCPGD-RSAITPGG  |
| <i>M. musculus</i>     | VLRNAQAMADALLKRGY::LDGARAERVLELVSITANKNTCPGD-RSAITPGG  |
| <i>D. melanogaster</i> | VLKNAKALCDGLISRGY::LTGAKAEYIIEEVGIAONKNTVPGD-KSAMNPSG  |
| <i>C. elegans</i>      | VLKNAKTLAERMKKHGY::VEGARAHVLDLAHIAONKNTCPGD-VSALRPGG   |
| <i>A. thaliana</i>     | VVSNCRALANRLVELGF::MDGARVEKILDMA SITLNKNSVPGD-KSALVPGG |
| <i>S. cerevisiae</i>   | IVDNSKWFAQELTKMGY::VDGARVETILSALNIAANKNTIPGD-KSALFPSG  |
| <i>E. coli</i>         | VAKNAKAMVEVFLERGY::LTGKEADAALGRANITVKNKNSVPNDPKSPFVTS  |

293

331

346

354

**b** Ac: Acetylation  
Succ: Succinylation

Functional Site

Functional Site

MLKREMNIAD...LTN**KY**AEGYPG**K**RYY...TTH**K**T...GP**R**GGIILA**K**GGSEELY**K**KLNSA...GKAVAL**K**EAM

5455  
Ac

62  
Succ

229  
Ac

235

242  
Succ

250  
Succ  
Ac

277  
Succ

EPEF**K**TYQQQVA**K**NAKAM...KNLTG**K**EADAAL...ITV**N**KNSVPNDP**K**SPFVTS...RGF**K**EAE...VYA

285  
Ac

293  
Succ

331  
Succ

346  
Succ

354  
Succ  
Ac

375  
Ac

**c**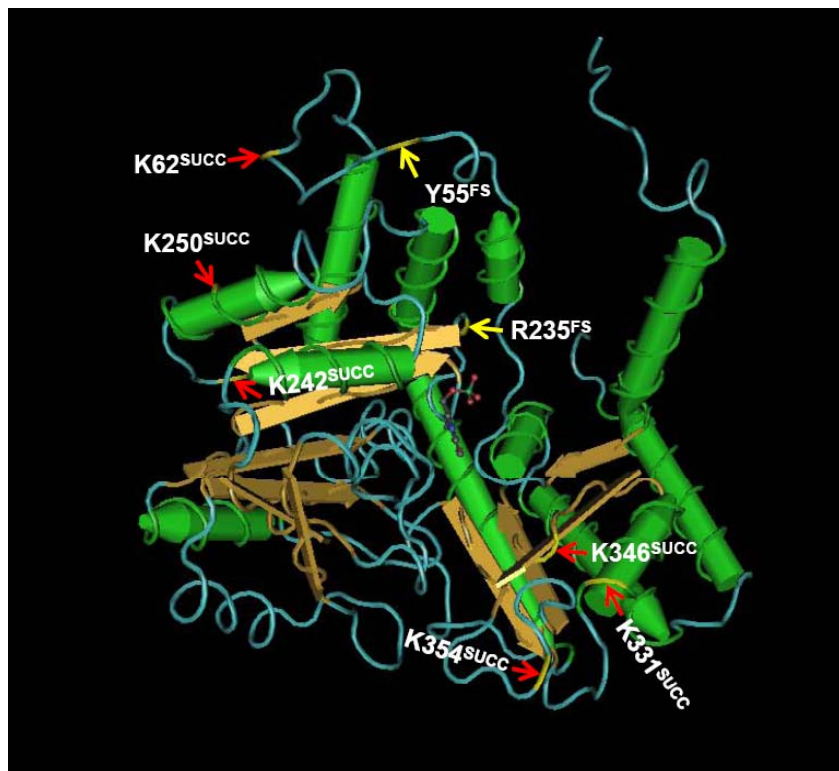**d**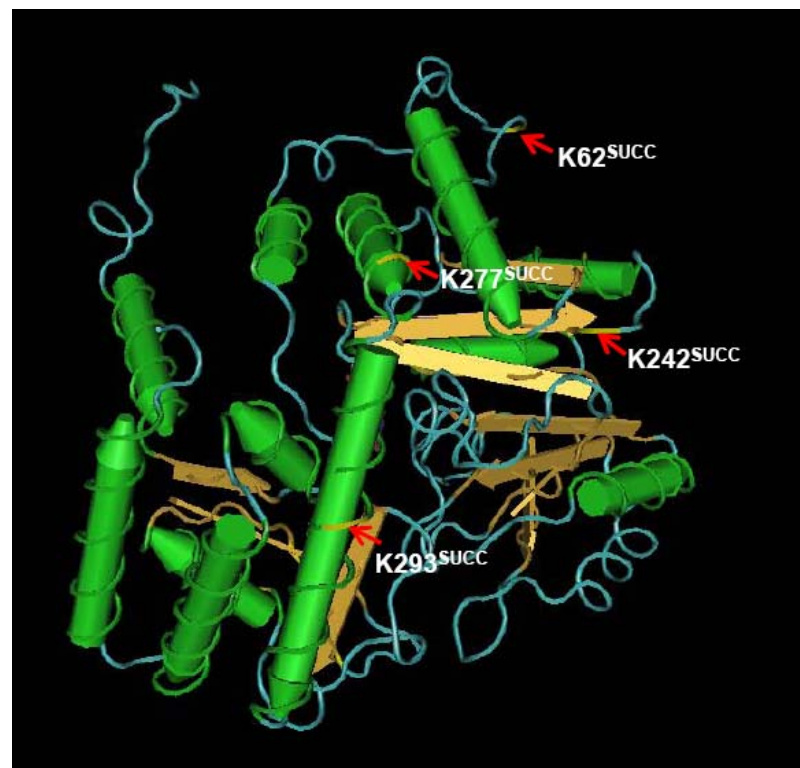

## Supplementary Figure 9:

### a Glyceraldehyde-3-phosphate dehydrogenase A

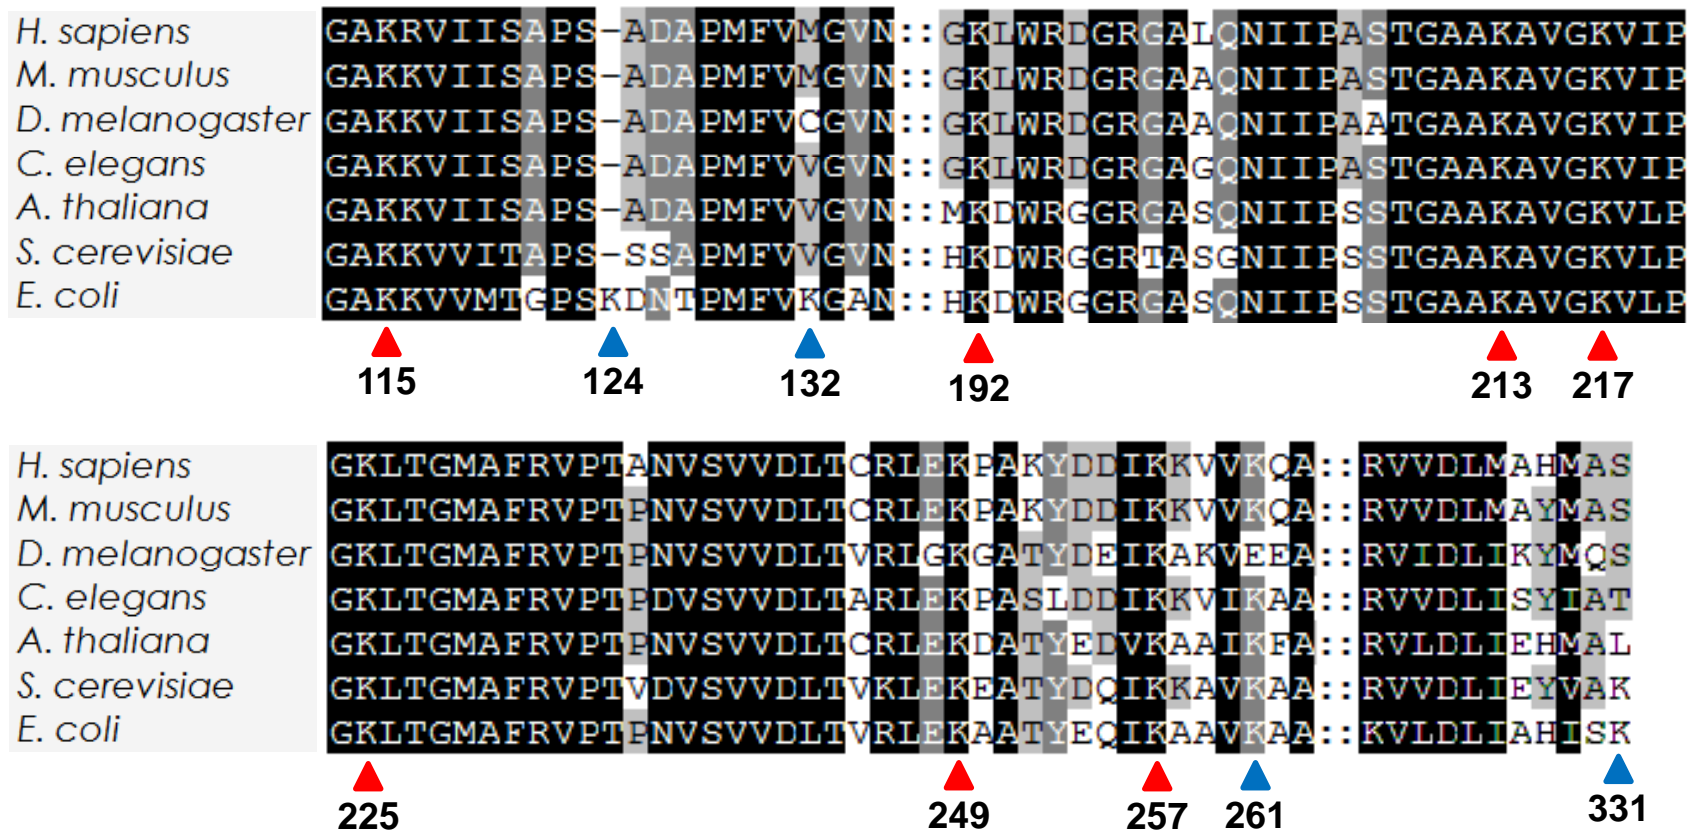

**b**

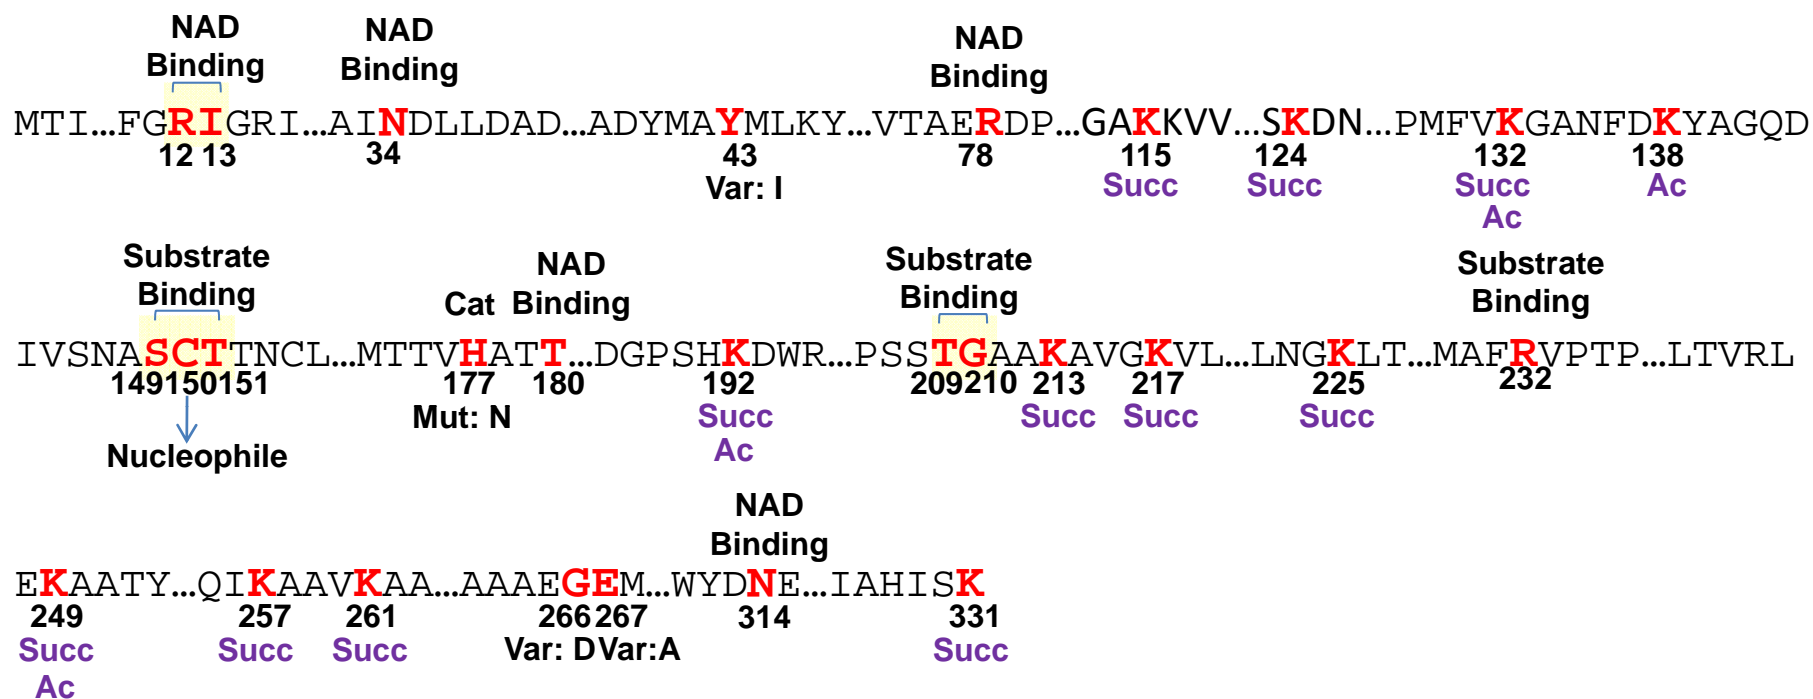

Ac: Acetylation  
Succ: Succinylation

Var: natural variant  
Cat: catalysis  
Mut: mutagenesis



**c**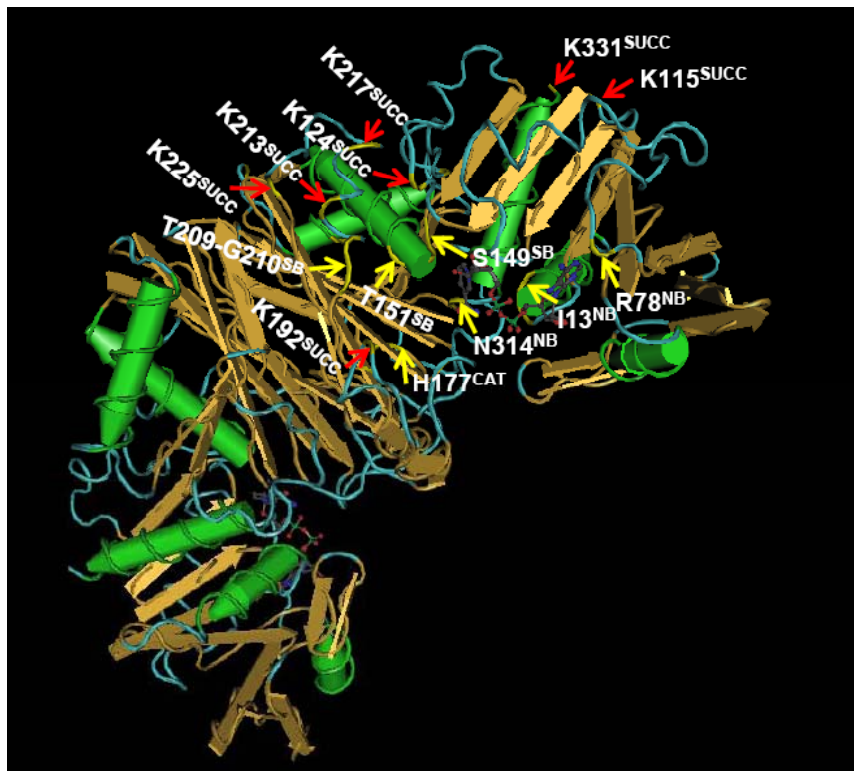**d**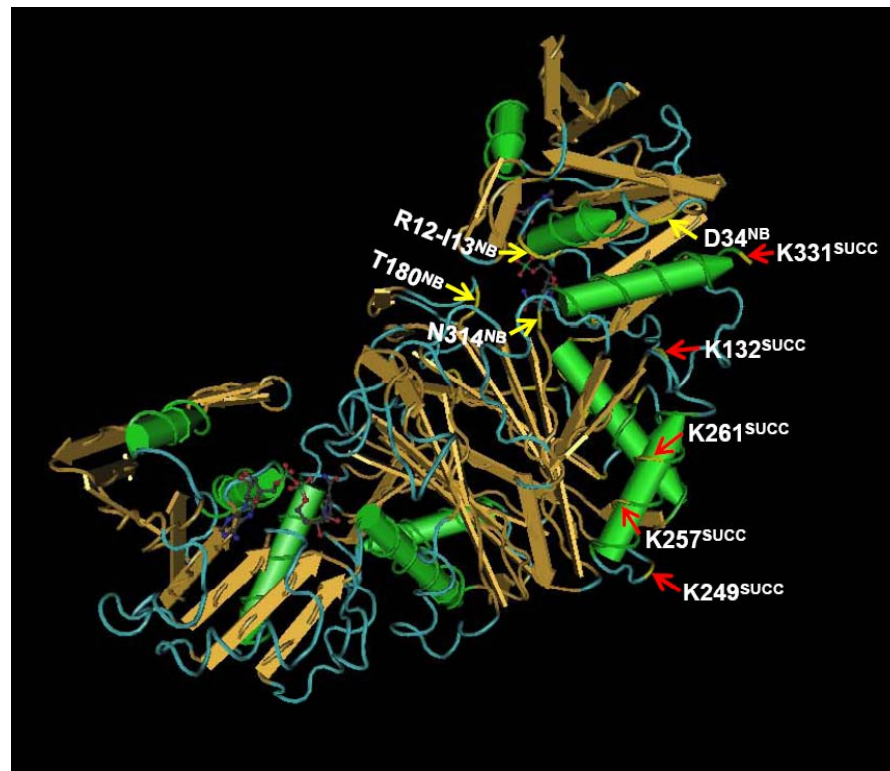

## Supplementary Figure 10:

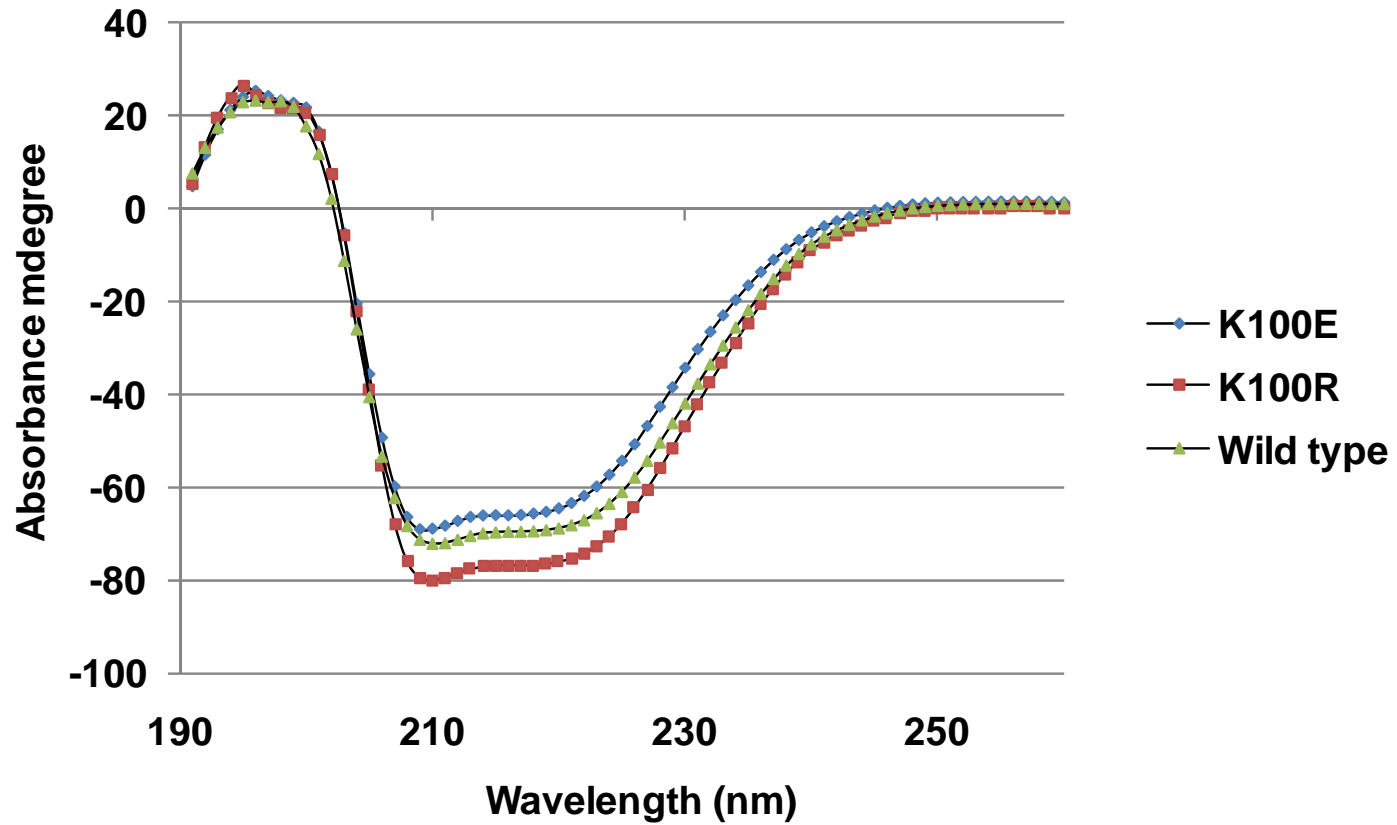

# Supplementary Figure 11:

VLPELQG<sup>Succ</sup>KLTGMAFR K255

MS/MS Fragmentation of **VLPELQKLTGMAFR**

Found in **gi|6321631**, Glyceraldehyde-3-phosphate dehydrogenase, isozyme 3, involved

Match to Query 21194: 1758.927524 from(880.471038,2+)

From data file xie010\_100219200501.dta

Click mouse within plot area to zoom in by factor of two about that point

Or,   to  Da

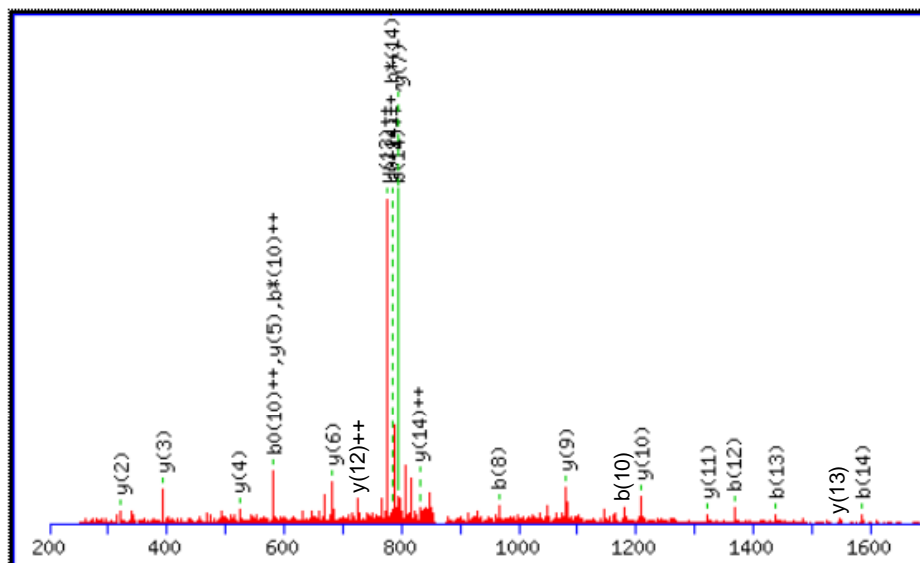

Monoisotopic mass of neutral peptide Mr(calcd): 1758.93

Variable modifications:

K8 : Succinyl (K)

Ions Score: 57 Expect: 0.0019

Matches (Bold Red): 20/142 fragment ions using 48 most intense peaks

| #  | b              | b <sup>++</sup> | b*      | b <sup>*++</sup> | b <sup>0</sup> | b <sup>0++</sup> | Seq. | y              | y <sup>++</sup> | y*      | y <sup>*++</sup> | y <sup>0</sup> | y <sup>0++</sup> | #  |
|----|----------------|-----------------|---------|------------------|----------------|------------------|------|----------------|-----------------|---------|------------------|----------------|------------------|----|
| 1  | 100.08         | 50.54           |         |                  |                |                  | V    |                |                 |         |                  |                |                  | 15 |
| 2  | 213.16         | 107.08          |         |                  |                |                  | L    | 1660.87        | <b>830.94</b>   | 1643.85 | 822.43           | 1642.86        | 821.93           | 14 |
| 3  | 310.21         | 155.61          |         |                  |                |                  | P    | 1547.79        | <b>774.40</b>   | 1530.76 | 765.88           | 1529.78        | 765.39           | 13 |
| 4  | 439.26         | 220.13          |         |                  | 421.24         | 211.13           | E    | 1450.74        | 725.87          | 1433.71 | 717.36           | 1432.73        | 716.87           | 12 |
| 5  | 552.34         | 276.67          |         |                  | 534.33         | 267.67           | L    | <b>1321.69</b> | 661.35          | 1304.67 | 652.84           | 1303.68        | 652.34           | 11 |
| 6  | 680.40         | 340.70          | 663.37  | 332.19           | 662.39         | 331.70           | Q    | <b>1208.61</b> | 604.81          | 1191.58 | 596.29           | 1190.60        | 595.80           | 10 |
| 7  | 737.42         | 369.21          | 720.39  | 360.70           | 719.41         | 360.21           | G    | <b>1080.55</b> | 540.78          | 1063.52 | 532.27           | 1062.54        | 531.77           | 9  |
| 8  | <b>965.53</b>  | 483.27          | 948.50  | 474.76           | 947.52         | 474.26           | K    | 1023.53        | 512.27          | 1006.50 | 503.75           | 1005.52        | 503.26           | 8  |
| 9  | 1078.61        | 539.81          | 1061.59 | 531.30           | 1060.60        | 530.81           | L    | <b>795.42</b>  | 398.21          | 778.39  | 389.70           | 777.41         | 389.21           | 7  |
| 10 | 1179.66        | 590.33          | 1162.64 | <b>581.82</b>    | 1161.65        | <b>581.33</b>    | T    | <b>682.33</b>  | 341.67          | 665.31  | 333.16           | 664.32         | 332.67           | 6  |
| 11 | 1236.68        | 618.85          | 1219.66 | 610.33           | 1218.67        | 609.84           | G    | <b>581.29</b>  | 291.15          | 564.26  | 282.63           |                |                  | 5  |
| 12 | <b>1367.72</b> | 684.37          | 1350.70 | 675.85           | 1349.71        | 675.36           | M    | <b>524.26</b>  | 262.64          | 507.24  | 254.12           |                |                  | 4  |
| 13 | <b>1438.76</b> | 719.88          | 1421.73 | 711.37           | 1420.75        | 710.88           | A    | <b>393.22</b>  | 197.12          | 376.20  | 188.60           |                |                  | 3  |
| 14 | <b>1585.83</b> | <b>793.42</b>   | 1568.80 | <b>784.91</b>    | 1567.82        | <b>784.41</b>    | F    | <b>322.19</b>  | 161.60          | 305.16  | 153.08           |                |                  | 2  |
| 15 |                |                 |         |                  |                |                  | R    | 175.12         | 88.06           | 158.09  | 79.55            |                |                  | 1  |

### Supplementary Figure 12:

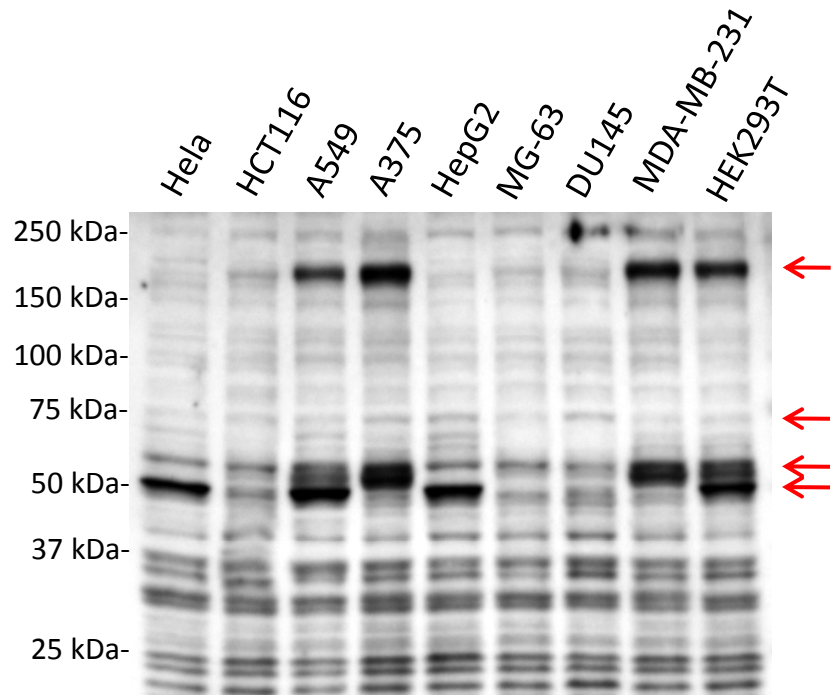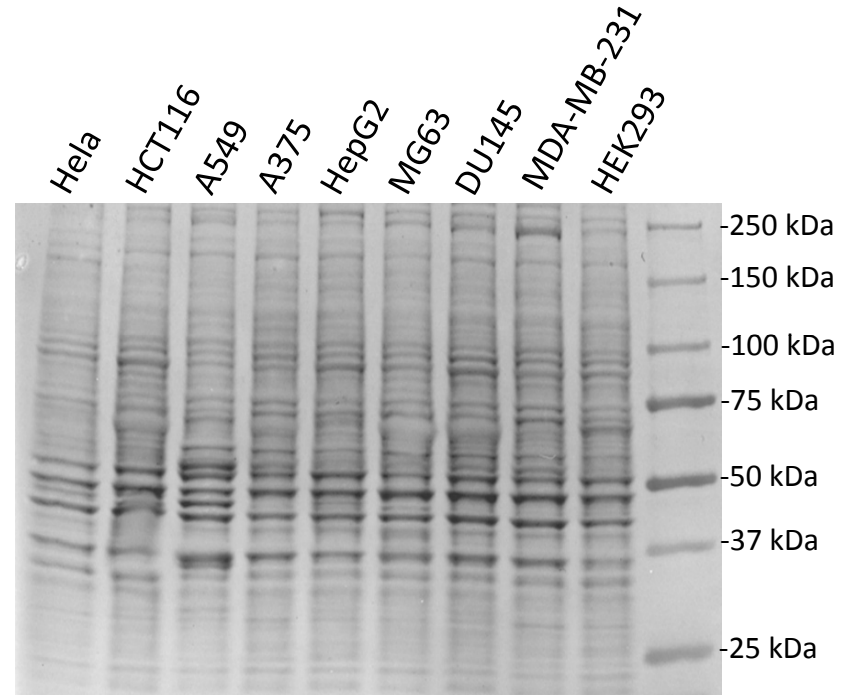

# Supplementary Figure 13:

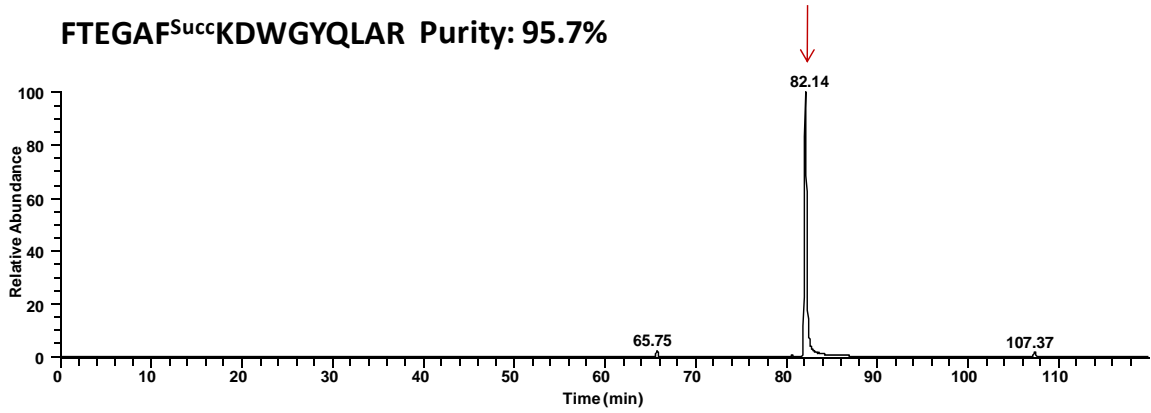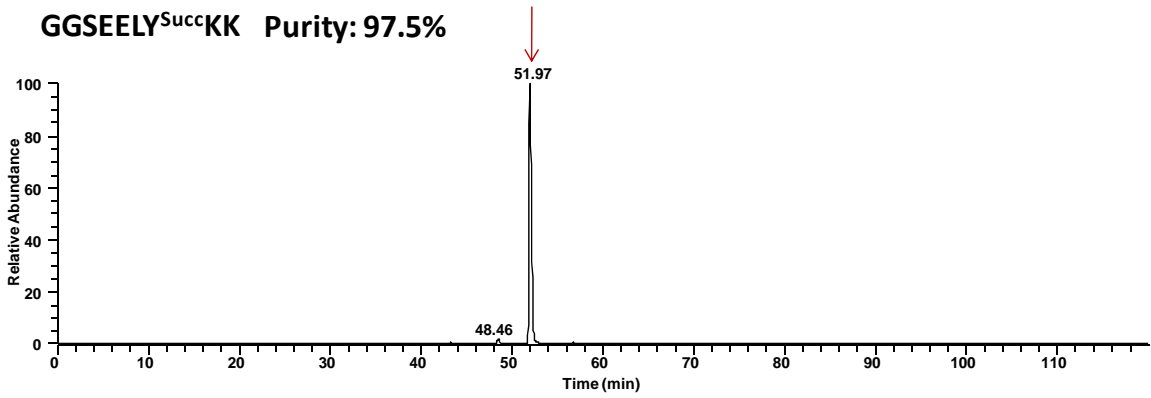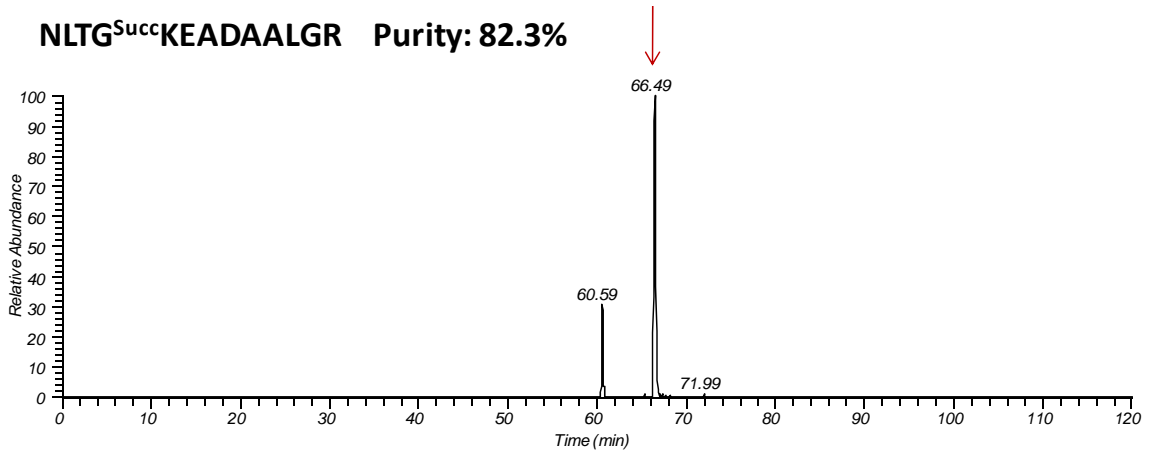

**GASQNIIPSTGAA<sup>Succ</sup>KAVGK Purity: 99.6%**

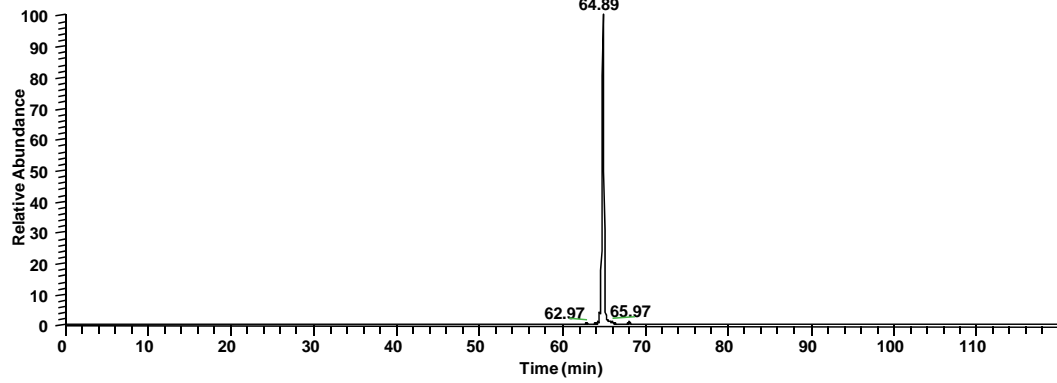

**FTEGAF<sup>MeMal</sup>KDWGYQLAR Purity: 98.5%**

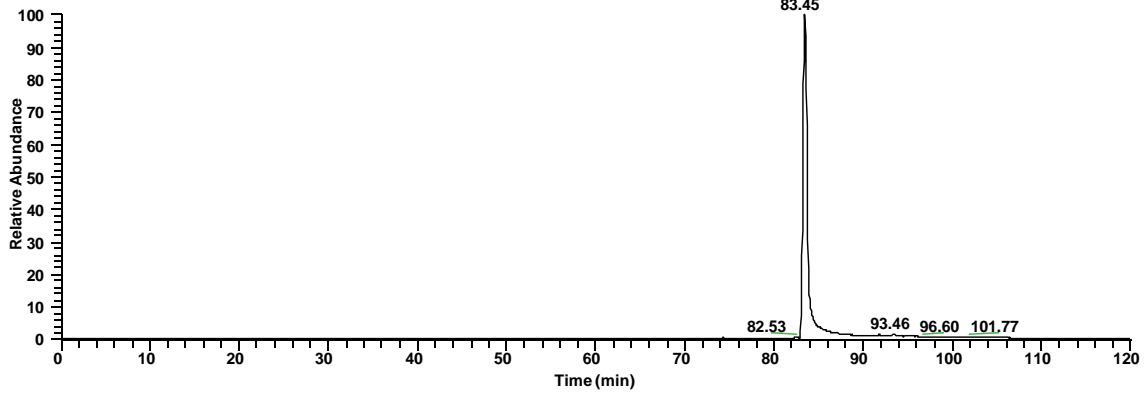

**GGSEELY<sup>MeMal</sup>KK Purity: 99.6%**

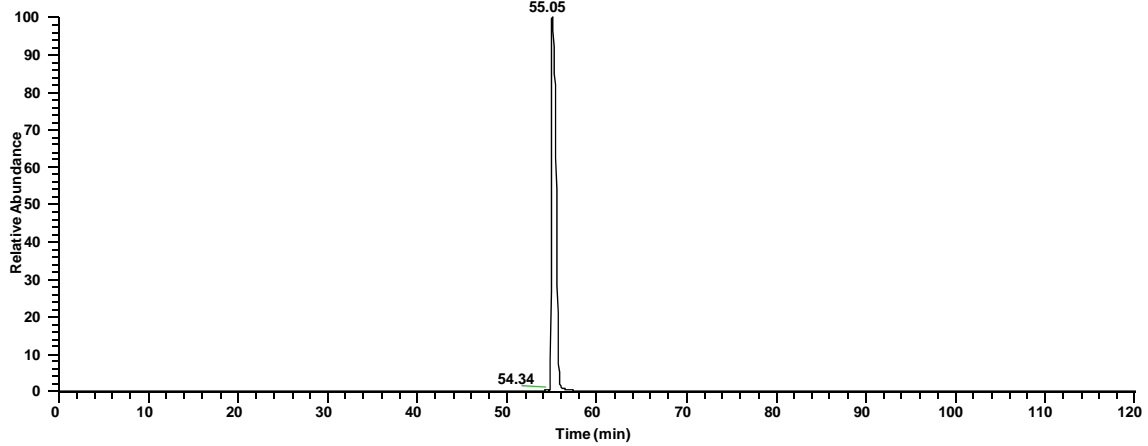

## Supplementary Table 1:

### H<sub>4</sub> and D<sub>4</sub>-labeled succinyllysine peptide sequences indentified from D4-succinate treated *E. Coli* sample by mass spectrometry\*

| Protein Name                                     | GI#       | site | peptide sequence        | Spectral No. of H4-succinyllysine peptide | Spectral No. of D4-succinyllysine peptide |
|--------------------------------------------------|-----------|------|-------------------------|-------------------------------------------|-------------------------------------------|
| isocitrate dehydrogenase (IcdA)                  | 170080787 | K100 | R.VAIKGPLTTPVGGGIR.S    | 1                                         | 0                                         |
| isocitrate dehydrogenase (IcdA)                  | 170080787 | K242 | K.FTEGAFKDWGYQLAR.E     | 0                                         | 1                                         |
| serine hydroxymethyltransferase (GlyA)           | 170082161 | K242 | R.GGLILAKGGSEELYK.K     | 1                                         | 2                                         |
| serine hydroxymethyltransferase (GlyA)           | 170082161 | K250 | K.GGSEELYKK.L           | 2                                         | 0                                         |
| serine hydroxymethyltransferase (GlyA)           | 170082161 | K277 | K.AVALKEAMEPEFK.T       | 2                                         | 0                                         |
| serine hydroxymethyltransferase (GlyA)           | 170082161 | K293 | K.TYQQQVAKNAK.A         | 1                                         | 1                                         |
| serine hydroxymethyltransferase (GlyA)           | 170082161 | K331 | K.NLTGKEADAALGR.A       | 2                                         | 2                                         |
| serine hydroxymethyltransferase (GlyA)           | 170082161 | K346 | R.ANITVNKNSVPNDPK.S     | 1                                         | 1                                         |
| glyceraldehyde-3-phosphate dehydrogenase A(GapA) | 170081435 | K124 | K.VVMTGPSKDNTPMFVK.G    | 10                                        | 9                                         |
| glyceraldehyde-3-phosphate dehydrogenase A(GapA) | 170081435 | K132 | K.DNTPMFVKGANFDK.Y      | 2                                         | 3                                         |
| glyceraldehyde-3-phosphate dehydrogenase A(GapA) | 170081435 | K213 | R.GASQNIIPSSTGAAKAVGK.V | 2                                         | 4                                         |
| glyceraldehyde-3-phosphate dehydrogenase A(GapA) | 170081435 | K217 | K.AVGKVLPELNGK.L        | 1                                         | 0                                         |
| glyceraldehyde-3-phosphate dehydrogenase A(GapA) | 170081435 | K225 | K.VLPELNGKLTGMAFR.V     | 1                                         | 0                                         |
| glyceraldehyde-3-phosphate dehydrogenase A(GapA) | 170081435 | K257 | K.AATYEQIKA AVK.A       | 2                                         | 2                                         |
| glyceraldehyde-3-phosphate dehydrogenase A(GapA) | 170081435 | K261 | K.AAVKAAAEGEMK.G        | 2                                         | 1                                         |
| glyceraldehyde-3-phosphate dehydrogenase A(GapA) | 170081435 | K331 | K.VLDLIAHISK.-          | 3                                         | 0                                         |

\*Results were based on Mascot sequence alignment using ion score cutoff 30.

## Supplementary Table 2:

### Primers used for site specific mutagenesis (mutated bases are shown in bold)

| Mutation |         | Primer                                                   |
|----------|---------|----------------------------------------------------------|
| K242R    | Forward | 5' GTTCACCGAAGGAGCGTTT <b>CGT</b> GACTGGGGCTACCAGCTG 3'  |
|          | Reverse | 5' CAGCTGGTAGCCCCAGTCA <b>ACG</b> AAACGCTCCTTCGGTGAAC 3' |
| K242E    | Forward | 5' CACCGAAGGAGCGTTT <b>GA</b> AAGACTGGGGCTACC 3'         |
|          | Reverse | 5' GGTAGCCCCAGTCTT <b>CAA</b> ACGCTCCTTCGGTG 3'          |
| K100R    | Forward | 5' GAATATCGCGTTGCCATT <b>CGT</b> GGTCCGCTGACCACTCCGG 3'  |
|          | Reverse | 5' CCGGAGTGGTCAGCGGACC <b>ACG</b> AATGGCAACGCGATATTC 3'  |
| K100E    | Forward | 5' GAATATCGCGTTGCCATT <b>GA</b> AAGGTCCGCTGACCACTC 3'    |
|          | Reverse | 5' GAGTGGTCAGCGGACCTT <b>CA</b> ATGGCAACGCGATATTC 3'     |



## Supplementary Table 3

*E. Coli* succinyllysine peptide sequences indentified by affinity purification using anti-succinyllysine pan antibody and mass spectrometry.

| Peptide                         | Position | GI#       | Succinylation Site | Protein Name                                 |
|---------------------------------|----------|-----------|--------------------|----------------------------------------------|
| R.VAIKGPLTTPVGGGIR.S            | 4        | 170080787 | 100                | isocitrate dehydrogenase, specific for NADP+ |
| K.FTEGAFKDWGYQLAR.E             | 7        | 170080787 | 242                | isocitrate dehydrogenase, specific for NADP+ |
| K.YAEGYPGKR.Y                   | 8        | 170082161 | 62                 | serine hydroxymethyltransferase              |
| R.GGLILAKGGSEELYK.K             | 7        | 170082161 | 242                | serine hydroxymethyltransferase              |
| K.GGSEELYKK.L                   | 8        | 170082161 | 250                | serine hydroxymethyltransferase              |
| K.AVALKEAMEPEFK.T               | 5        | 170082161 | 277                | serine hydroxymethyltransferase              |
| K.TYQQQVAKNAK.A                 | 8        | 170082161 | 293                | serine hydroxymethyltransferase              |
| K.NLTGKEADAALGR.A               | 5        | 170082161 | 331                | serine hydroxymethyltransferase              |
| R.ANITVKNKNSVPNDPK.S            | 7        | 170082161 | 346                | serine hydroxymethyltransferase              |
| K.NSVPNDPKSPFVTS GIR.V          | 8        | 170082161 | 354                | serine hydroxymethyltransferase              |
| K.HITAGAKK.V                    | 7        | 170081435 | 115                | glyceraldehyde-3-phosphate dehydrogenase A   |
| K.VVMTGPSKDNTPMFVK.G            | 8        | 170081435 | 124                | glyceraldehyde-3-phosphate dehydrogenase A   |
| K.DNTPMFVKGANFDK.Y              | 8        | 170081435 | 132                | glyceraldehyde-3-phosphate dehydrogenase A   |
| K.TVDGPSHKDWR.G                 | 8        | 170081435 | 192                | glyceraldehyde-3-phosphate dehydrogenase A   |
| R.GASQNIIPSSTGAAKAVGK.V         | 15       | 170081435 | 213                | glyceraldehyde-3-phosphate dehydrogenase A   |
| K.AVGKVLPELNGK.L                | 4        | 170081435 | 217                | glyceraldehyde-3-phosphate dehydrogenase A   |
| K.VLPELNGKLTGMAFR.V             | 8        | 170081435 | 225                | glyceraldehyde-3-phosphate dehydrogenase A   |
| R.LEKAATYEQIK.A                 | 3        | 170081435 | 249                | glyceraldehyde-3-phosphate dehydrogenase A   |
| K.AATYEQIKAAVK.A                | 8        | 170081435 | 257                | glyceraldehyde-3-phosphate dehydrogenase A   |
| K.AAVKAAAEGEMK.G                | 4        | 170081435 | 261                | glyceraldehyde-3-phosphate dehydrogenase A   |
| K.VLDLIAHISK.                   | 10       | 170081435 | 331                | glyceraldehyde-3-phosphate dehydrogenase A   |
| K.IFDVVKPGVITGDDVQK.V           | 6        | 170082482 | 9                  | fructose-bisphosphate aldolase, class II     |
| K.APVIVQFSNGGASFIAGKGVK.S       | 18       | 170082482 | 72                 | fructose-bisphosphate aldolase, class II     |
| K.KLLPWIDGLLDAGEK.H             | 1        | 170082482 | 115                | fructose-bisphosphate aldolase, class II     |
| R.FTIAASFQNVHGVYKPGNVVLTPTILR.D | 15       | 170082482 | 231                | fructose-bisphosphate aldolase, class II     |
| R.DSQEYVSKK.H                   | 8        | 170082482 | 251                | fructose-bisphosphate aldolase, class II     |
| K.ANEAYLQGGQLGNPKGEDQPNKK.Y     | 14       | 170082482 | 319                | fructose-bisphosphate aldolase, class II     |
| K.GEDQPNKK.Y                    | 7        | 170082482 | 326                | fructose-bisphosphate aldolase, class II     |
| R.LEKAFQELNAIDVL.               | 3        | 170082482 | 348                | fructose-bisphosphate aldolase, class II     |

| Peptide                  | Position | GI #      | Succinylation Site | Protein Name                                              |
|--------------------------|----------|-----------|--------------------|-----------------------------------------------------------|
| K.TTLTAAITTVLAKTYGGAAR.A | 13       | 170083440 | 38                 | protein chain elongation factor EF-Tu (duplicate of tufA) |
| R.GSALKALEGDAEWEAK.I     | 5        | 170083440 | 177                | protein chain elongation factor EF-Tu (duplicate of tufA) |
| K.VGEEVEIVGIKETQK.S      | 13       | 170083440 | 249                | protein chain elongation factor EF-Tu (duplicate of tufA) |
| K.ETQKSTCTGVEMFR.K       | 4        | 170083440 | 253                | protein chain elongation factor EF-Tu (duplicate of tufA) |
| R.GQVLAKPGTIKPHTK.F      | 5        | 170083440 | 295                | protein chain elongation factor EF-Tu (duplicate of tufA) |
| K.FESEVYILSKDEGGR.H      | 10       | 170083440 | 314                | protein chain elongation factor EF-Tu (duplicate of tufA) |
| K.VMEGVKLENR.T           | 6        | 170080561 | 63                 | pyruvate formate lyase I                                  |
| K.IVGLQTEAPLKR.A         | 11       | 170080561 | 107                | pyruvate formate lyase I                                  |
| R.ALIPFGGIKMIEGSCK.A     | 9        | 170080561 | 117                | pyruvate formate lyase I                                  |
| K.MIEGSKAYNR.E           | 7        | 170080561 | 124                | pyruvate formate lyase I                                  |
| R.VALYGIDYLMKDK.L        | 11       | 170080561 | 195                | pyruvate formate lyase I                                  |
| K.TMLYAINGGVDEKLL.M      | 13       | 170080561 | 454                | pyruvate formate lyase I                                  |
| K.SEPIKGDVLYDEVMER.M     | 5        | 170080561 | 467                | pyruvate formate lyase I                                  |
| K.GAVASLTSVAKLPFAYAK.D   | 11       | 170080561 | 654                | pyruvate formate lyase I                                  |
| K.AAGAELVGMEDLADQIKK.G   | 17       | 170083444 | 105                | 50S ribosomal subunit protein L1                          |
| K.VGTVTPNVAEAVKNAK.A     | 13       | 170083444 | 154                | 50S ribosomal subunit protein L1                          |
| K.LKENLEALLVALK.K        | 2        | 170083444 | 186                | 50S ribosomal subunit protein L1                          |
| K.ENLEALLVALKK.A         | 11       | 170083444 | 197                | 50S ribosomal subunit protein L1                          |
| R.QAVTNPQNTLFAIKR.L      | 14       | 170079677 | 70                 | chaperone Hsp70, co-chaperone with DnaJ                   |
| R.LINYLVEEFKK.D          | 10       | 170079677 | 245                | chaperone Hsp70, co-chaperone with DnaJ                   |
| K.KDQGIDLR.N             | 1        | 170079677 | 246                | chaperone Hsp70, co-chaperone with DnaJ                   |
| R.AKLESLVEDLVNR.S        | 2        | 170079677 | 304                | chaperone Hsp70, co-chaperone with DnaJ                   |
| K.VAEFFGKEPR.K           | 7        | 170079677 | 359                | chaperone Hsp70, co-chaperone with DnaJ                   |
| K.ITIKASSGLNEDEIQK.M     | 4        | 170079677 | 502                | chaperone Hsp70, co-chaperone with DnaJ                   |
| R.KFEELVQTR.N            | 1        | 170079677 | 528                | chaperone Hsp70, co-chaperone with DnaJ                   |
| K.AAIEAKMQELAQVSQK.L     | 4        | 170079677 | 587                | chaperone Hsp70, co-chaperone with DnaJ                   |
| K.VTLGPKGR.N             | 6        | 170083592 | 34                 | Cpn60 chaperonin GroEL, large subunit of GroESL           |
| K.SFGAPTITKDGVSVAR.E     | 9        | 170083592 | 51                 | Cpn60 chaperonin GroEL, large subunit of GroESL           |
| K.AVAAGMNPMDLKR.G        | 12       | 170083592 | 117                | Cpn60 chaperonin GroEL, large subunit of GroESL           |
| K.VAAVKAPGFGDR.R         | 5        | 170083592 | 277                | Cpn60 chaperonin GroEL, large subunit of GroESL           |
| K.ATLEDLGQAKR.V          | 10       | 170083592 | 321                | Cpn60 chaperonin GroEL, large subunit of GroESL           |
| K.VGAATEVEMKEK.K         | 10       | 170083592 | 390                | Cpn60 chaperonin GroEL, large subunit of GroESL           |
| R.SFTFVTKTPPAAVLLK.K     | 7        | 170083443 | 72                 | 50S ribosomal subunit protein L11                         |
| K.TPPAAVLLKK.A           | 9        | 170083443 | 81                 | 50S ribosomal subunit protein L11                         |
| R.VTQVKDLANDGYR.A        | 5        | 170082839 | 38                 | 50S ribosomal subunit protein L3                          |
| R.LKDLETQSQDGTDFDK.L     | 2        | 170079805 | 115                | 30S ribosomal subunit protein S2                          |
| K.SAGGIVLTGSAAAKSTR.G    | 14       | 170083591 | 34                 | Cpn10 chaperonin GroES, small subunit of GroESL           |
| K.INALETVTIASKAGDEGK.L   | 12       | 170083648 | 83                 | 50S ribosomal subunit protein L9                          |
| R.AEKINALETVTIASK.A      | 3        | 170083648 | 71                 | 50S ribosomal subunit protein L9                          |
| R.DIADAVTAAGVEVAKSEVR.L  | 15       | 170083648 | 112                | 50S ribosomal subunit protein L9                          |

## Supplementary Data 1:

**MS/MS spectra indentified from 2,2,3,3-D<sub>4</sub>-succinate treated and immunoprecipitation-enriched sample using anti-succinyllysine antibody**

Note: D<sub>4</sub>-succinyllysine and H<sub>4</sub>-succinyllysine peptides might be coeluted together. Results were based on Mascot sequence alignment using ion score cutoff 30.

# Isocitrate dehydrogenase K100

VAI<sup>Succ</sup>KGPLTTPVGGGIR

MS/MS Fragmentation of **VAIKGPLTTPVGGGIR**

Found in **gi170080787**, isocitrate dehydrogenase, specific for NADP+ [Escherichia col

Match to Query 11470: 1634.936194 from(818.475373,2+)

From data file xie021.dta

Click mouse within plot area to zoom in by factor of two about that point

Or, Plot from  to  Da

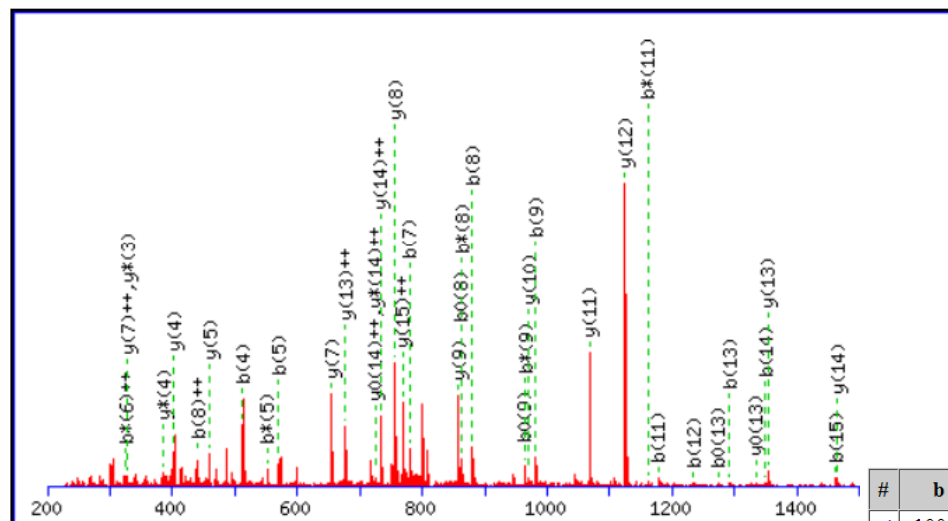

Monoisotopic mass of neutral peptide Mr(calc): 1634.94

Variable modifications:

K4 : Succinyl (K)

Ions Score: 36 Expect: 0.073

| #  | b       | b <sup>++</sup> | b*      | b <sup>*++</sup> | b <sup>0</sup> | b <sup>0++</sup> | Seq. | y       | y <sup>++</sup> | y*      | y <sup>*++</sup> | y <sup>0</sup> | y <sup>0++</sup> | #  |
|----|---------|-----------------|---------|------------------|----------------|------------------|------|---------|-----------------|---------|------------------|----------------|------------------|----|
| 1  | 100.08  | 50.54           |         |                  |                |                  | V    |         |                 |         |                  |                |                  | 16 |
| 2  | 171.11  | 86.06           |         |                  |                |                  | A    | 1536.87 | 768.94          | 1519.85 | 760.43           | 1518.86        | 759.94           | 15 |
| 3  | 284.20  | 142.60          |         |                  |                |                  | I    | 1465.84 | 733.42          | 1448.81 | 724.91           | 1447.83        | 724.42           | 14 |
| 4  | 512.31  | 256.66          | 495.28  | 248.14           |                |                  | K    | 1352.75 | 676.88          | 1335.73 | 668.37           | 1334.74        | 667.87           | 13 |
| 5  | 569.33  | 285.17          | 552.30  | 276.66           |                |                  | G    | 1124.64 | 562.82          | 1107.62 | 554.31           | 1106.63        | 553.82           | 12 |
| 6  | 666.38  | 333.69          | 649.36  | 325.18           |                |                  | P    | 1067.62 | 534.31          | 1050.59 | 525.80           | 1049.61        | 525.31           | 11 |
| 7  | 779.47  | 390.24          | 762.44  | 381.72           |                |                  | L    | 970.57  | 485.79          | 953.54  | 477.27           | 952.56         | 476.78           | 10 |
| 8  | 880.51  | 440.76          | 863.49  | 432.25           | 862.50         | 431.76           | T    | 857.48  | 429.25          | 840.46  | 420.73           | 839.47         | 420.24           | 9  |
| 9  | 981.56  | 491.28          | 964.53  | 482.77           | 963.55         | 482.28           | T    | 756.44  | 378.72          | 739.41  | 370.21           | 738.43         | 369.72           | 8  |
| 10 | 1078.61 | 539.81          | 1061.59 | 531.30           | 1060.60        | 530.81           | P    | 655.39  | 328.20          | 638.36  | 319.68           |                |                  | 7  |
| 11 | 1177.68 | 589.34          | 1160.66 | 580.83           | 1159.67        | 580.34           | V    | 558.34  | 279.67          | 541.31  | 271.16           |                |                  | 6  |
| 12 | 1234.70 | 617.86          | 1217.68 | 609.34           | 1216.69        | 608.85           | G    | 459.27  | 230.14          | 442.24  | 221.62           |                |                  | 5  |
| 13 | 1291.73 | 646.37          | 1274.70 | 637.85           | 1273.72        | 637.36           | G    | 402.25  | 201.63          | 385.22  | 193.11           |                |                  | 4  |
| 14 | 1348.75 | 674.88          | 1331.72 | 666.36           | 1330.74        | 665.87           | G    | 345.22  | 173.12          | 328.20  | 164.60           |                |                  | 3  |
| 15 | 1461.83 | 731.42          | 1444.80 | 722.91           | 1443.82        | 722.41           | I    | 288.20  | 144.61          | 271.18  | 136.09           |                |                  | 2  |
| 16 |         |                 |         |                  |                |                  | R    | 175.12  | 88.06           | 158.09  | 79.55            |                |                  | 1  |

# Isocitrate dehydrogenase K242

FTEGAF<sup>Succ-D4</sup>KDWGYQLAR

MS/MS Fragmentation of **FTEGAFKDWGYQLAR**

Found in **gi|170080787**, isocitrate dehydrogenase, specific for NADP+ [Escherichia coli

Match to Query 14390: 1891.902254 from(946.958403,2+)

From data file xie021.dta

Click mouse within plot area to zoom in by factor of two about that point

Or, Plot from  to  Da

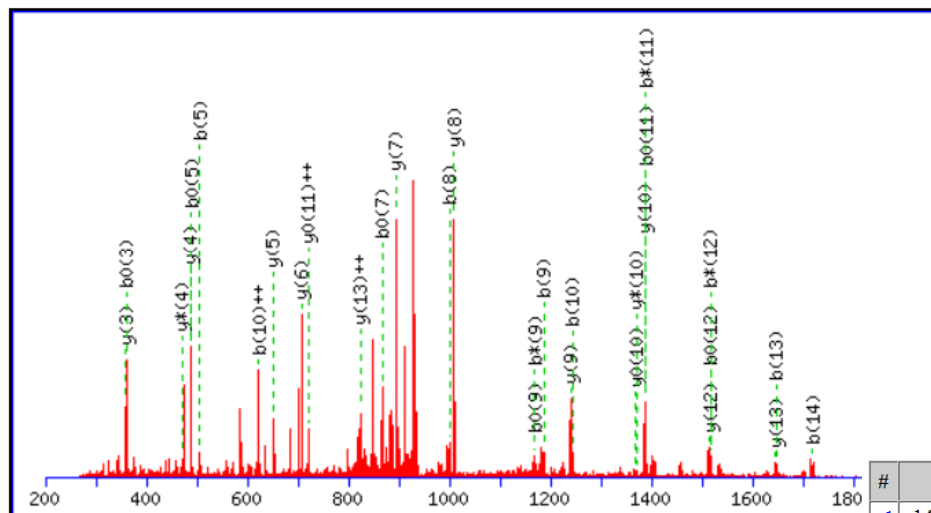

Monoisotopic mass of neutral peptide  $M_r(\text{calc})$ : 1891.90

Variable modifications:

K7 : Succinyl (K-D4)

Ions Score: 30 Expect: 0.11

| #  | b       | b <sup>++</sup> | b <sup>*</sup> | b <sup>*++</sup> | b <sup>0</sup> | b <sup>0++</sup> | Seq. | y       | y <sup>++</sup> | y <sup>*</sup> | y <sup>*++</sup> | y <sup>0</sup> | y <sup>0++</sup> | #  |
|----|---------|-----------------|----------------|------------------|----------------|------------------|------|---------|-----------------|----------------|------------------|----------------|------------------|----|
| 1  | 148.08  | 74.54           |                |                  |                |                  | F    |         |                 |                |                  |                |                  | 15 |
| 2  | 249.12  | 125.07          |                |                  | 231.11         | 116.06           | T    | 1745.84 | 873.43          | 1728.82        | 864.91           | 1727.83        | 864.42           | 14 |
| 3  | 378.17  | 189.59          |                |                  | 360.16         | 180.58           | E    | 1644.80 | 822.90          | 1627.77        | 814.39           | 1626.78        | 813.90           | 13 |
| 4  | 435.19  | 218.10          |                |                  | 417.18         | 209.09           | G    | 1515.75 | 758.38          | 1498.73        | 749.87           | 1497.74        | 749.37           | 12 |
| 5  | 506.22  | 253.62          |                |                  | 488.21         | 244.61           | A    | 1458.73 | 729.87          | 1441.70        | 721.36           | 1440.72        | 720.86           | 11 |
| 6  | 653.29  | 327.15          |                |                  | 635.28         | 318.14           | F    | 1387.69 | 694.35          | 1370.67        | 685.84           | 1369.68        | 685.35           | 10 |
| 7  | 885.43  | 443.22          | 868.40         | 434.70           | 867.42         | 434.21           | K    | 1240.63 | 620.82          | 1223.60        | 612.30           | 1222.62        | 611.81           | 9  |
| 8  | 1000.46 | 500.73          | 983.43         | 492.22           | 982.45         | 491.73           | D    | 1008.49 | 504.75          | 991.46         | 496.24           | 990.48         | 495.74           | 8  |
| 9  | 1186.54 | 593.77          | 1169.51        | 585.26           | 1168.52        | 584.77           | W    | 893.46  | 447.24          | 876.44         | 438.72           |                |                  | 7  |
| 10 | 1243.56 | 622.28          | 1226.53        | 613.77           | 1225.55        | 613.28           | G    | 707.38  | 354.20          | 690.36         | 345.68           |                |                  | 6  |
| 11 | 1406.62 | 703.81          | 1389.59        | 695.30           | 1388.61        | 694.81           | Y    | 650.36  | 325.68          | 633.34         | 317.17           |                |                  | 5  |
| 12 | 1534.68 | 767.84          | 1517.65        | 759.33           | 1516.67        | 758.84           | Q    | 487.30  | 244.15          | 470.27         | 235.64           |                |                  | 4  |
| 13 | 1647.76 | 824.39          | 1630.74        | 815.87           | 1629.75        | 815.38           | L    | 359.24  | 180.12          | 342.21         | 171.61           |                |                  | 3  |
| 14 | 1718.80 | 859.90          | 1701.77        | 851.39           | 1700.79        | 850.90           | A    | 246.16  | 123.58          | 229.13         | 115.07           |                |                  | 2  |
| 15 |         |                 |                |                  |                |                  | R    | 175.12  | 88.06           | 158.09         | 79.55            |                |                  | 1  |

# serine hydroxymethyltransferase K242

# GGLILA<sup>Succ</sup>KGGSEELYK

## MS/MS Fragmentation of **GGLILAKGGSEELYK**

Found in **gi|170082161**, serine hydroxymethyltransferase [Escherichia coli str. K-12 su

Match to Query 11452: 1633.855504 from(817.935028,2+)

From data file xie021.dta

Click mouse within plot area to zoom in by factor of two about that point

Or,   to  Da

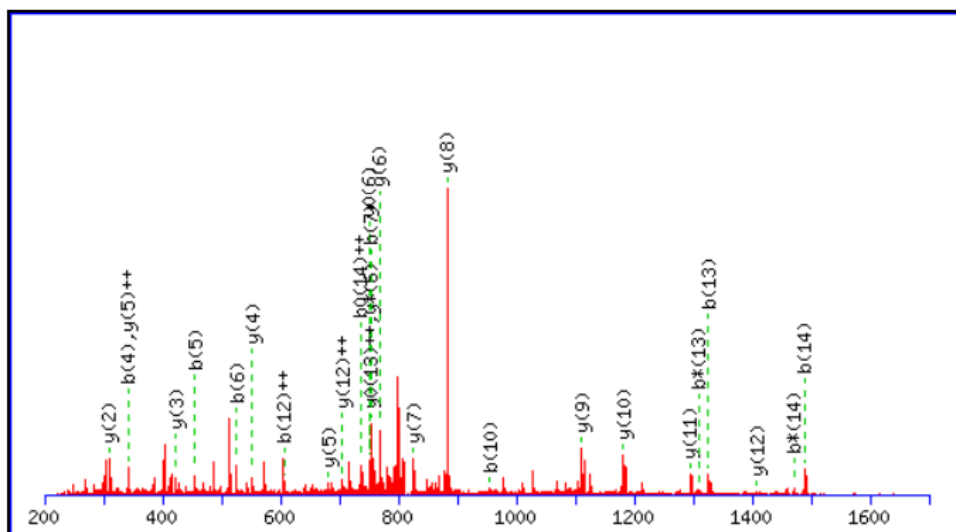

Monoisotopic mass of neutral peptide  $M_r(\text{calc})$ : 1633.86

Variable modifications:

K7 : Succinyl (K)

Ions Score: 38 Expect: 0.019

| #  | b       | b <sup>++</sup> | b*      | b <sup>+++</sup> | b <sup>0</sup> | b <sup>0++</sup> | Seq. | y       | y <sup>++</sup> | y*      | y <sup>+++</sup> | y <sup>0</sup> | y <sup>0++</sup> | #  |
|----|---------|-----------------|---------|------------------|----------------|------------------|------|---------|-----------------|---------|------------------|----------------|------------------|----|
| 1  | 58.03   | 29.52           |         |                  |                |                  | G    |         |                 |         |                  |                |                  | 15 |
| 2  | 115.05  | 58.03           |         |                  |                |                  | G    | 1577.84 | 789.42          | 1560.82 | 780.91           | 1559.83        | 780.42           | 14 |
| 3  | 228.13  | 114.57          |         |                  |                |                  | L    | 1520.82 | 760.91          | 1503.79 | 752.40           | 1502.81        | 751.91           | 13 |
| 4  | 341.22  | 171.11          |         |                  |                |                  | I    | 1407.74 | 704.37          | 1390.71 | 695.86           | 1389.73        | 695.37           | 12 |
| 5  | 454.30  | 227.65          |         |                  |                |                  | L    | 1294.65 | 647.83          | 1277.63 | 639.32           | 1276.64        | 638.82           | 11 |
| 6  | 525.34  | 263.17          |         |                  |                |                  | A    | 1181.57 | 591.29          | 1164.54 | 582.77           | 1163.56        | 582.28           | 10 |
| 7  | 753.45  | 377.23          | 736.42  | 368.72           |                |                  | K    | 1110.53 | 555.77          | 1093.50 | 547.26           | 1092.52        | 546.76           | 9  |
| 8  | 810.47  | 405.74          | 793.45  | 397.23           |                |                  | G    | 882.42  | 441.71          | 865.39  | 433.20           | 864.41         | 432.71           | 8  |
| 9  | 867.49  | 434.25          | 850.47  | 425.74           |                |                  | G    | 825.40  | 413.20          | 808.37  | 404.69           | 807.39         | 404.20           | 7  |
| 10 | 954.53  | 477.77          | 937.50  | 469.25           | 936.51         | 468.76           | S    | 768.38  | 384.69          | 751.35  | 376.18           | 750.37         | 375.69           | 6  |
| 11 | 1083.57 | 542.29          | 1066.54 | 533.77           | 1065.56        | 533.28           | E    | 681.35  | 341.18          | 664.32  | 332.66           | 663.33         | 332.17           | 5  |
| 12 | 1212.61 | 606.81          | 1195.58 | 598.30           | 1194.60        | 597.80           | E    | 552.30  | 276.66          | 535.28  | 268.14           | 534.29         | 267.65           | 4  |
| 13 | 1325.69 | 663.35          | 1308.67 | 654.84           | 1307.68        | 654.35           | L    | 423.26  | 212.13          | 406.23  | 203.62           |                |                  | 3  |
| 14 | 1488.76 | 744.88          | 1471.73 | 736.37           | 1470.75        | 735.88           | Y    | 310.18  | 155.59          | 293.15  | 147.08           |                |                  | 2  |
| 15 |         |                 |         |                  |                |                  | K    | 147.11  | 74.06           | 130.09  | 65.55            |                |                  | 1  |

# serine hydroxymethyltransferase K242

# GGLILA<sup>Succ-D4</sup>KGGSEELYK

MS/MS Fragmentation of **GGLILAKGGSEELYK**

Found in **gi|170082161**, serine hydroxymethyltransferase [Escherichia coli str. K-12 sul

Match to Query 11483: 1637.881264 from(819.947908,2+)

From data file xie021.dta

Click mouse within plot area to zoom in by factor of two about that point

Or,   to  Da

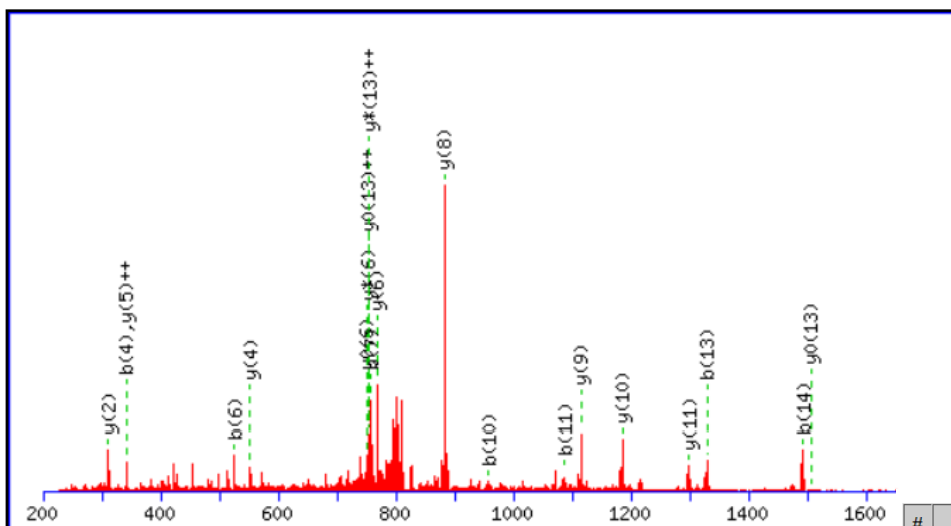

Monoisotopic mass of neutral peptide  $M_r(\text{calc})$ : 1637.88

Variable modifications:

K7 : Succinyl (K-D4)

Ions Score: 57 Expect: 0.00019

| #  | b       | b <sup>++</sup> | b*      | b <sup>*++</sup> | b <sup>0</sup> | b <sup>0++</sup> | Seq. | y       | y <sup>++</sup> | y*      | y <sup>*++</sup> | y <sup>0</sup> | y <sup>0++</sup> | #  |
|----|---------|-----------------|---------|------------------|----------------|------------------|------|---------|-----------------|---------|------------------|----------------|------------------|----|
| 1  | 58.03   | 29.52           |         |                  |                |                  | G    |         |                 |         |                  |                |                  | 15 |
| 2  | 115.05  | 58.03           |         |                  |                |                  | G    | 1581.87 | 791.44          | 1564.84 | 782.92           | 1563.86        | 782.43           | 14 |
| 3  | 228.13  | 114.57          |         |                  |                |                  | L    | 1524.85 | 762.93          | 1507.82 | 754.41           | 1506.84        | 753.92           | 13 |
| 4  | 341.22  | 171.11          |         |                  |                |                  | I    | 1411.76 | 706.38          | 1394.74 | 697.87           | 1393.75        | 697.38           | 12 |
| 5  | 454.30  | 227.65          |         |                  |                |                  | L    | 1298.68 | 649.84          | 1281.65 | 641.33           | 1280.67        | 640.84           | 11 |
| 6  | 525.34  | 263.17          |         |                  |                |                  | A    | 1185.59 | 593.30          | 1168.57 | 584.79           | 1167.58        | 584.30           | 10 |
| 7  | 757.48  | 379.24          | 740.45  | 370.73           |                |                  | K    | 1114.56 | 557.78          | 1097.53 | 549.27           | 1096.55        | 548.78           | 9  |
| 8  | 814.50  | 407.75          | 797.47  | 399.24           |                |                  | G    | 882.42  | 441.71          | 865.39  | 433.20           | 864.41         | 432.71           | 8  |
| 9  | 871.52  | 436.26          | 854.49  | 427.75           |                |                  | G    | 825.40  | 413.20          | 808.37  | 404.69           | 807.39         | 404.20           | 7  |
| 10 | 958.55  | 479.78          | 941.52  | 471.27           | 940.54         | 470.77           | S    | 768.38  | 384.69          | 751.35  | 376.18           | 750.37         | 375.69           | 6  |
| 11 | 1087.59 | 544.30          | 1070.57 | 535.79           | 1069.58        | 535.29           | E    | 681.35  | 341.18          | 664.32  | 332.66           | 663.33         | 332.17           | 5  |
| 12 | 1216.64 | 608.82          | 1199.61 | 600.31           | 1198.63        | 599.82           | E    | 552.30  | 276.66          | 535.28  | 268.14           | 534.29         | 267.65           | 4  |
| 13 | 1329.72 | 665.36          | 1312.69 | 656.85           | 1311.71        | 656.36           | L    | 423.26  | 212.13          | 406.23  | 203.62           |                |                  | 3  |
| 14 | 1492.78 | 746.90          | 1475.76 | 738.38           | 1474.77        | 737.89           | Y    | 310.18  | 155.59          | 293.15  | 147.08           |                |                  | 2  |
| 15 |         |                 |         |                  |                |                  | K    | 147.11  | 74.06           | 130.09  | 65.55            |                |                  | 1  |

# serine hydroxymethyltransferase K250

# GGSEELY<sup>Succ</sup>KK

MS/MS Fragmentation of **GGSEELYKK**

Found in [gi|170082161](#), serine hydroxymethyltransferase [Escherichia coli str. K-12 sub:

Match to Query 4032: 1109.524814 from(555.769683,2+)

From data file xie021.dta

Click mouse within plot area to zoom in by factor of two about that point

Or, Plot from  to  Da

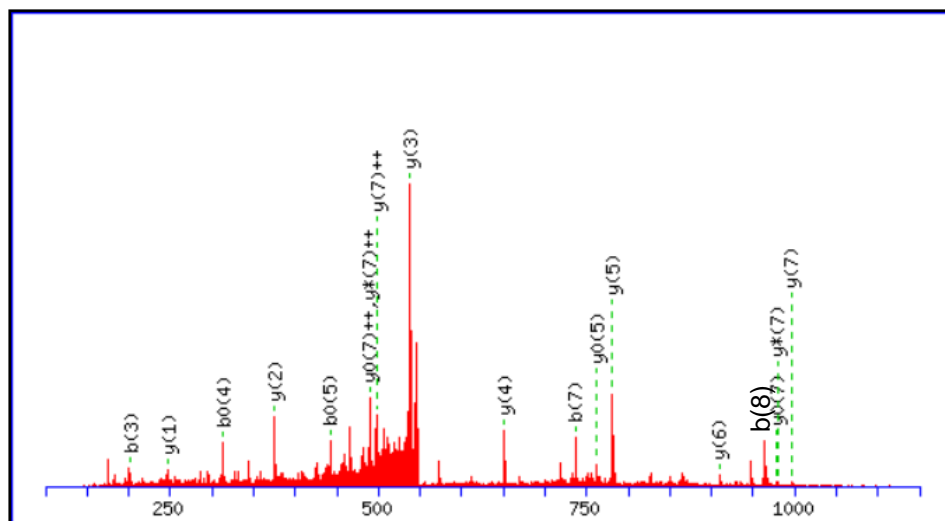

Monoisotopic mass of neutral peptide Mr(calc) : 1109.52

Variable modifications:

• K8 : Succinyl (K)

Ions Score: 30 Expect: 0.078

| # | b             | b <sup>++</sup> | b <sup>*</sup> | b <sup>*++</sup> | b <sup>0</sup> | b <sup>0++</sup> | Seq. | y             | y <sup>++</sup> | y <sup>*</sup> | y <sup>*++</sup> | y <sup>0</sup> | y <sup>0++</sup> | # |
|---|---------------|-----------------|----------------|------------------|----------------|------------------|------|---------------|-----------------|----------------|------------------|----------------|------------------|---|
| 1 | 58.03         | 29.52           |                |                  |                |                  | G    |               |                 |                |                  |                |                  | 9 |
| 2 | 115.05        | 58.03           |                |                  |                |                  | G    | 1053.51       | 527.26          | 1036.48        | 518.75           | 1035.50        | 518.25           | 8 |
| 3 | <b>202.08</b> | 101.54          |                |                  | 184.07         | 92.54            | S    | <b>996.49</b> | <b>498.75</b>   | <b>979.46</b>  | <b>490.23</b>    | <b>978.48</b>  | <b>489.74</b>    | 7 |
| 4 | 331.12        | 166.07          |                |                  | <b>313.11</b>  | 157.06           | E    | <b>909.46</b> | 455.23          | 892.43         | 446.72           | 891.45         | 446.23           | 6 |
| 5 | 460.17        | 230.59          |                |                  | <b>442.16</b>  | 221.58           | E    | <b>780.41</b> | 390.71          | 763.39         | 382.20           | <b>762.40</b>  | 381.71           | 5 |
| 6 | 573.25        | 287.13          |                |                  | 555.24         | 278.12           | L    | <b>651.37</b> | 326.19          | 634.34         | 317.68           |                |                  | 4 |
| 7 | <b>736.31</b> | 368.66          |                |                  | 718.30         | 359.66           | Y    | <b>538.29</b> | 269.65          | 521.26         | 261.13           |                |                  | 3 |
| 8 | <b>964.41</b> | 432.71          | 847.38         | 424.20           | 846.40         | 423.70           | K    | <b>375.22</b> | 188.12          | 358.20         | 179.60           |                |                  | 2 |
| 9 |               |                 |                |                  |                |                  | K    | 147.13        | 124.07          | 230.10         | 115.55           |                |                  | 1 |



# serine hydroxymethyltransferase K277

# AVAL<sup>Succ</sup>KEAMEPEFK

MS/MS Fragmentation of **AVALKEAMEPEFK**

Found in **gi|170082161**, serine hydroxymethyltransferase [Escherichia coli str. K-12 su

Match to Query 10634: 1561.768954 from(781.891753,2+)

From data file xie021.dta

Click mouse within plot area to zoom in by factor of two about that point

Or,   to  Da

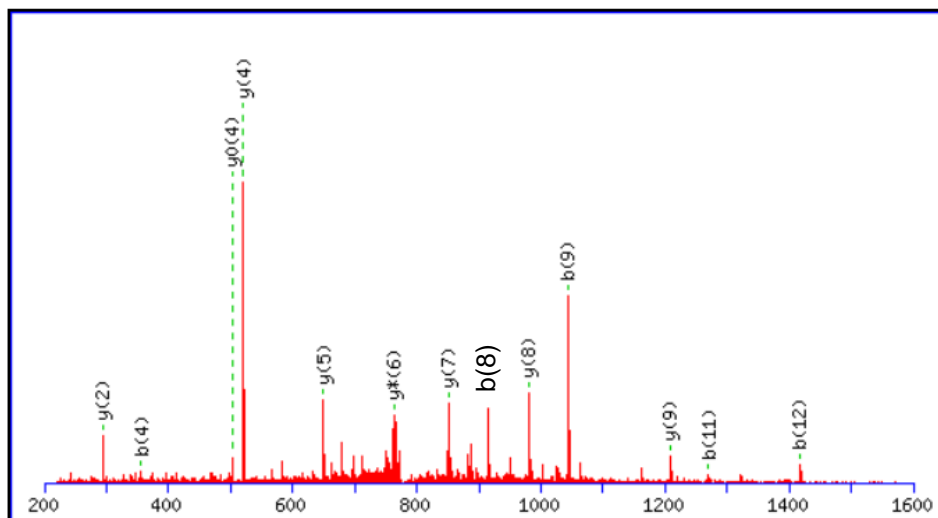

Monoisotopic mass of neutral peptide Mr(calc) : 1561.77

Variable modifications:

K5 : Succinyl (K)

Ions Score: 43 Expect: 0.0053

| #  | b              | b <sup>++</sup> | b*      | b <sup>*++</sup> | b <sup>0</sup> | b <sup>0++</sup> | Seq. | y              | y <sup>++</sup> | y*            | y <sup>*++</sup> | y <sup>0</sup> | y <sup>0++</sup> | #  |
|----|----------------|-----------------|---------|------------------|----------------|------------------|------|----------------|-----------------|---------------|------------------|----------------|------------------|----|
| 1  | 72.04          | 36.53           |         |                  |                |                  | A    |                |                 |               |                  |                |                  | 13 |
| 2  | 171.11         | 86.06           |         |                  |                |                  | V    | 1491.74        | 746.37          | 1474.71       | 737.86           | 1473.73        | 737.37           | 12 |
| 3  | 242.15         | 121.58          |         |                  |                |                  | A    | 1392.67        | 696.84          | 1375.64       | 688.33           | 1374.66        | 687.83           | 11 |
| 4  | <b>355.23</b>  | 178.12          |         |                  |                |                  | L    | 1321.63        | 661.32          | 1304.61       | 652.81           | 1303.62        | 652.32           | 10 |
| 5  | 583.34         | 292.18          | 566.32  | 283.66           |                |                  | K    | <b>1208.55</b> | 604.78          | 1191.52       | 596.27           | 1190.54        | 595.77           | 9  |
| 6  | 712.39         | 356.70          | 695.36  | 348.18           | 694.38         | 347.69           | E    | <b>980.44</b>  | 490.72          | 963.41        | 482.21           | 962.43         | 481.72           | 8  |
| 7  | 783.42         | 392.22          | 766.40  | 383.70           | 765.41         | 383.21           | A    | <b>851.40</b>  | 426.20          | 834.37        | 417.69           | 833.39         | 417.20           | 7  |
| 8  | 914.47         | 457.74          | 897.44  | 449.22           | 896.45         | 448.73           | M    | 780.36         | 390.68          | <b>763.33</b> | 382.17           | 762.35         | 381.68           | 6  |
| 9  | <b>1043.51</b> | 522.26          | 1026.48 | 513.74           | 1025.50        | 513.25           | E    | <b>649.32</b>  | 325.16          | 632.29        | 316.65           | 631.31         | 316.16           | 5  |
| 10 | 1140.56        | 570.78          | 1123.53 | 562.27           | 1122.55        | 561.78           | P    | <b>520.28</b>  | 260.64          | 503.25        | 252.13           | <b>502.27</b>  | 251.64           | 4  |
| 11 | <b>1269.60</b> | 635.31          | 1252.58 | 626.79           | 1251.59        | 626.30           | E    | 423.22         | 212.12          | 406.20        | 203.60           | 405.21         | 203.11           | 3  |
| 12 | <b>1416.67</b> | 708.84          | 1399.64 | 700.33           | 1398.66        | 699.83           | F    | <b>294.18</b>  | 147.59          | 277.15        | 139.08           |                |                  | 2  |
| 13 |                |                 |         |                  |                |                  | K    | 147.11         | 74.06           | 130.09        | 65.55            |                |                  | 1  |

# serine hydroxymethyltransferase K293

## TYQQQVA<sup>Succ</sup>KNAK

MS/MS Fragmentation of **TYQQQVAKNAK**

Found in [gi170082161](#), serine hydroxymethyltransferase [Escherichia coli str. K-12 str.]

Match to Query 8106: 1377.689124 from(689.851838,2+)

From data file xie021.dta

Click mouse within plot area to zoom in by factor of two about that point

Or,   to  Da

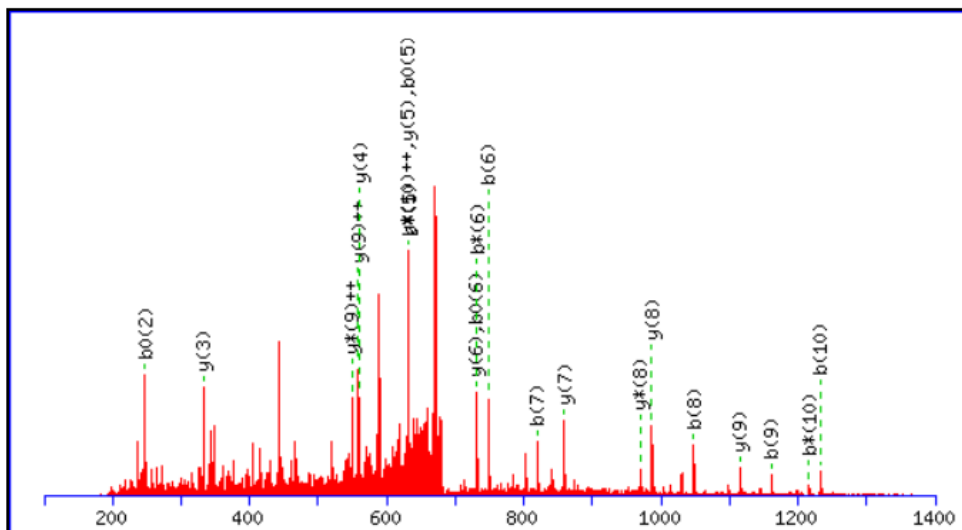

Monoisotopic mass of neutral peptide  $M_r(\text{calc})$ : 1377.69

Variable modifications:

K8 : Succinyl (K)

Ions Score: 34 Expect: 0.04

| #  | b       | b <sup>++</sup> | b*      | b <sup>*++</sup> | b <sup>0</sup> | b <sup>0++</sup> | Seq. | y       | y <sup>++</sup> | y*      | y <sup>*++</sup> | #  |
|----|---------|-----------------|---------|------------------|----------------|------------------|------|---------|-----------------|---------|------------------|----|
| 1  | 102.05  | 51.53           |         |                  | 84.04          | 42.53            | T    |         |                 |         |                  | 11 |
| 2  | 265.12  | 133.06          |         |                  | 247.11         | 124.06           | Y    | 1277.65 | 639.33          | 1260.62 | 630.81           | 10 |
| 3  | 393.18  | 197.09          | 376.15  | 188.58           | 375.17         | 188.09           | Q    | 1114.59 | 557.80          | 1097.56 | 549.28           | 9  |
| 4  | 521.24  | 261.12          | 504.21  | 252.61           | 503.22         | 252.12           | Q    | 986.53  | 493.77          | 969.50  | 485.25           | 8  |
| 5  | 649.29  | 325.15          | 632.27  | 316.64           | 631.28         | 316.15           | Q    | 858.47  | 429.74          | 841.44  | 421.22           | 7  |
| 6  | 748.36  | 374.68          | 731.34  | 366.17           | 730.35         | 365.68           | V    | 730.41  | 365.71          | 713.38  | 357.20           | 6  |
| 7  | 819.40  | 410.20          | 802.37  | 401.69           | 801.39         | 401.20           | A    | 631.34  | 316.17          | 614.31  | 307.66           | 5  |
| 8  | 1047.51 | 524.26          | 1030.48 | 515.75           | 1029.50        | 515.25           | K    | 560.30  | 280.66          | 543.28  | 272.14           | 4  |
| 9  | 1161.55 | 581.28          | 1144.53 | 572.77           | 1143.54        | 572.28           | N    | 332.19  | 166.60          | 315.17  | 158.09           | 3  |
| 10 | 1232.59 | 616.80          | 1215.56 | 608.29           | 1214.58        | 607.79           | A    | 218.15  | 109.58          | 201.12  | 101.07           | 2  |
| 11 |         |                 |         |                  |                |                  | K    | 147.11  | 74.06           | 130.09  | 65.55            | 1  |

# serine hydroxymethyltransferase K293

TYQQQVA<sup>Succ-D4</sup>KNAK

MS/MS Fragmentation of **TYQQQVAKNAK**

Found in [gi|170082161](#), serine hydroxymethyltransferase [Escherichia coli str. K-12 sub

Match to Query 8182: 1381.714394 from(691.864473,2+)

From data file xie021.dta

Click mouse within plot area to zoom in by factor of two about that point

Or,   to  Da

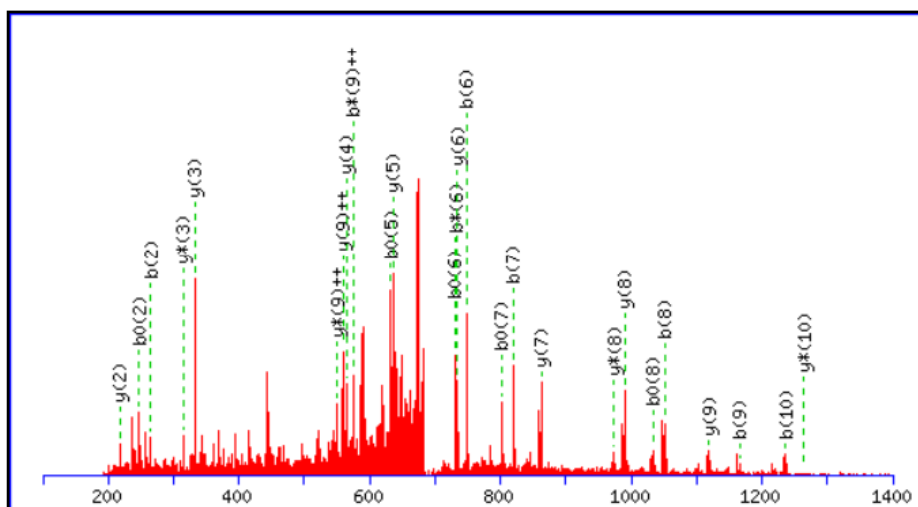

Monoisotopic mass of neutral peptide  $M_r(\text{calc})$ : 1381.71

Variable modifications:

K8 : Succinyl (K-D4)

Ions Score: 32 Expect: 0.055

| #  | b              | b <sup>++</sup> | b*            | b <sup>*++</sup> | b <sup>0</sup> | b <sup>0++</sup> | Seq. | y              | y <sup>++</sup> | y*             | y <sup>*++</sup> | #  |
|----|----------------|-----------------|---------------|------------------|----------------|------------------|------|----------------|-----------------|----------------|------------------|----|
| 1  | 102.05         | 51.53           |               |                  | 84.04          | 42.53            | T    |                |                 |                |                  | 11 |
| 2  | <b>265.12</b>  | 133.06          |               |                  | <b>247.11</b>  | 124.06           | Y    | 1281.67        | 641.34          | <b>1264.65</b> | 632.83           | 10 |
| 3  | 393.18         | 197.09          | 376.15        | 188.58           | 375.17         | 188.09           | Q    | <b>1118.61</b> | <b>559.81</b>   | 1101.58        | <b>551.30</b>    | 9  |
| 4  | 521.24         | 261.12          | 504.21        | 252.61           | 503.22         | 252.12           | Q    | <b>990.55</b>  | 495.78          | <b>973.53</b>  | 487.27           | 8  |
| 5  | 649.29         | 325.15          | 632.27        | 316.64           | <b>631.28</b>  | 316.15           | Q    | <b>862.49</b>  | 431.75          | 845.47         | 423.24           | 7  |
| 6  | <b>748.36</b>  | 374.68          | <b>731.34</b> | 366.17           | <b>730.35</b>  | 365.68           | V    | <b>734.43</b>  | 367.72          | 717.41         | 359.21           | 6  |
| 7  | <b>819.40</b>  | 410.20          | 802.37        | 401.69           | <b>801.39</b>  | 401.20           | A    | <b>635.37</b>  | 318.19          | 618.34         | 309.67           | 5  |
| 8  | <b>1051.54</b> | 526.27          | 1034.51       | 517.76           | <b>1033.53</b> | 517.27           | K    | <b>564.33</b>  | 282.67          | 547.30         | 274.15           | 4  |
| 9  | <b>1165.58</b> | 583.29          | 1148.55       | <b>574.78</b>    | 1147.57        | 574.29           | N    | <b>332.19</b>  | 166.60          | <b>315.17</b>  | 158.09           | 3  |
| 10 | <b>1236.62</b> | 618.81          | 1219.59       | 610.30           | 1218.61        | 609.81           | A    | <b>218.15</b>  | 109.58          | 201.12         | 101.07           | 2  |
| 11 |                |                 |               |                  |                |                  | K    | 147.11         | 74.06           | 130.09         | 65.55            | 1  |

# serine hydroxymethyltransferase K331

# NLTG<sup>Succ</sup>KEADAALGR

MS/MS Fragmentation of **NLTGKEADAALGR**

Found in [gi170082161](#), serine hydroxymethyltransferase [Escherichia coli str. K-12 sub

Match to Query 8623: 1414.706574 from(708.360563,2+)

From data file xie021.dta

Click mouse within plot area to zoom in by factor of two about that point

Or, Plot from  to  Da

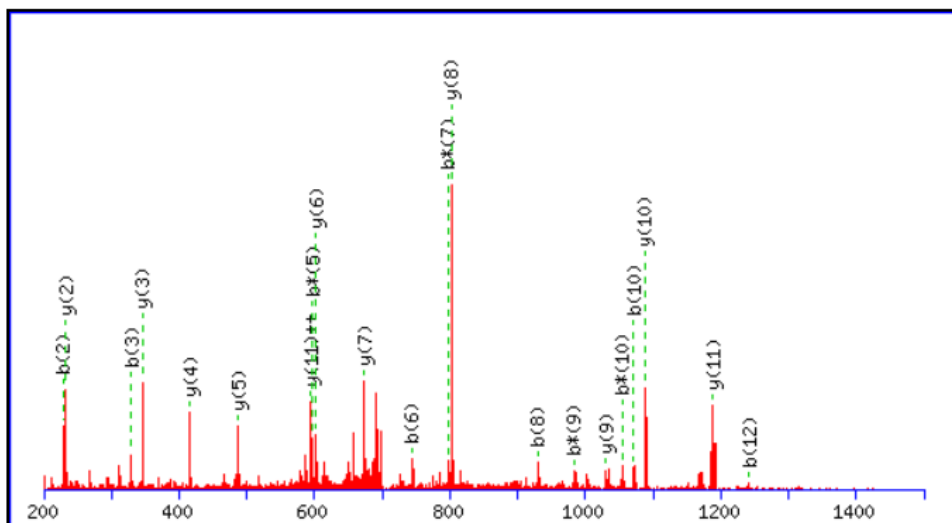

Monoisotopic mass of neutral peptide  $M_r(\text{calc})$ : 1414.71

Variable modifications:

K5 : Succinyl (K)

Ions Score: 61 Expect: 8.2e-005

| #  | b              | b <sup>++</sup> | b*             | b <sup>*++</sup> | b <sup>0</sup> | b <sup>0++</sup> | Seq. | y              | y <sup>++</sup> | y*      | y <sup>*++</sup> | y <sup>0</sup> | y <sup>0++</sup> | #  |
|----|----------------|-----------------|----------------|------------------|----------------|------------------|------|----------------|-----------------|---------|------------------|----------------|------------------|----|
| 1  | 115.05         | 58.03           | 98.02          | 49.52            |                |                  | N    |                |                 |         |                  |                |                  | 13 |
| 2  | <b>228.13</b>  | 114.57          | 211.11         | 106.06           |                |                  | L    | 1301.67        | 651.34          | 1284.64 | 642.83           | 1283.66        | 642.33           | 12 |
| 3  | <b>329.18</b>  | 165.09          | 312.16         | 156.58           | 311.17         | 156.09           | T    | <b>1188.59</b> | <b>594.80</b>   | 1171.56 | 586.28           | 1170.57        | 585.79           | 11 |
| 4  | 386.20         | 193.61          | 369.18         | 185.09           | 368.19         | 184.60           | G    | <b>1087.54</b> | 544.27          | 1070.51 | 535.76           | 1069.53        | 535.27           | 10 |
| 5  | 614.31         | 307.66          | <b>597.29</b>  | 299.15           | 596.30         | 298.66           | K    | <b>1030.52</b> | 515.76          | 1013.49 | 507.25           | 1012.51        | 506.76           | 9  |
| 6  | <b>743.36</b>  | 372.18          | 726.33         | 363.67           | 725.35         | 363.18           | E    | <b>802.41</b>  | 401.71          | 785.38  | 393.19           | 784.39         | 392.70           | 8  |
| 7  | 814.39         | 407.70          | <b>797.37</b>  | 399.19           | 796.38         | 398.70           | A    | <b>673.36</b>  | 337.19          | 656.34  | 328.67           | 655.35         | 328.18           | 7  |
| 8  | <b>929.42</b>  | 465.21          | 912.39         | 456.70           | 911.41         | 456.21           | D    | <b>602.33</b>  | 301.67          | 585.30  | 293.15           | 584.32         | 292.66           | 6  |
| 9  | 1000.46        | 500.73          | <b>983.43</b>  | 492.22           | 982.45         | 491.73           | A    | <b>487.30</b>  | 244.15          | 470.27  | 235.64           |                |                  | 5  |
| 10 | <b>1071.50</b> | 536.25          | <b>1054.47</b> | 527.74           | 1053.48        | 527.25           | A    | <b>416.26</b>  | 208.63          | 399.24  | 200.12           |                |                  | 4  |
| 11 | 1184.58        | 592.79          | 1167.55        | 584.28           | 1166.57        | 583.79           | L    | <b>345.22</b>  | 173.12          | 328.20  | 164.60           |                |                  | 3  |
| 12 | <b>1241.60</b> | 621.30          | 1224.57        | 612.79           | 1223.59        | 612.30           | G    | <b>232.14</b>  | 116.57          | 215.11  | 108.06           |                |                  | 2  |
| 13 |                |                 |                |                  |                |                  | R    | 175.12         | 88.06           | 158.09  | 79.55            |                |                  | 1  |

# serine hydroxymethyltransferase K331

# NLTG<sup>Succ-D4</sup>KEADAALGR

MS/MS Fragmentation of **NLTGKEADAALGR**

Found in **gi|170082161**, serine hydroxymethyltransferase [Escherichia coli str. K-12 sul

Match to Query 8657: 1418.730134 from(710.372343,2+)

From data file xie021.dta

Click mouse within plot area to zoom in by factor of two about that point

Or,   to  Da

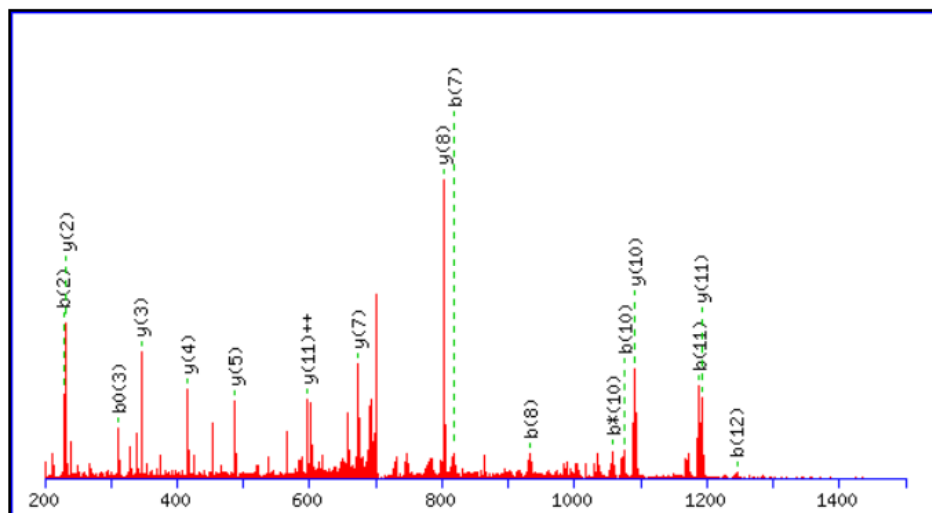

Monoisotopic mass of neutral peptide  $M_r(\text{calc})$ : 1418.73

Variable modifications:

K5 : Succinyl (K-D4)

Ions Score: 53 Expect: 0.00057

| #  | b              | b <sup>++</sup> | b*             | b <sup>*++</sup> | b <sup>0</sup> | b <sup>0++</sup> | Seq. | y              | y <sup>++</sup> | y*      | y <sup>*++</sup> | y <sup>0</sup> | y <sup>0++</sup> | #  |
|----|----------------|-----------------|----------------|------------------|----------------|------------------|------|----------------|-----------------|---------|------------------|----------------|------------------|----|
| 1  | 115.05         | 58.03           | 98.02          | 49.52            |                |                  | N    |                |                 |         |                  |                |                  | 13 |
| 2  | <b>228.13</b>  | 114.57          | 211.11         | 106.06           |                |                  | L    | 1305.69        | 653.35          | 1288.67 | 644.84           | 1287.68        | 644.35           | 12 |
| 3  | 329.18         | 165.09          | 312.16         | 156.58           | <b>311.17</b>  | 156.09           | T    | <b>1192.61</b> | <b>596.81</b>   | 1175.58 | 588.30           | 1174.60        | 587.80           | 11 |
| 4  | 386.20         | 193.61          | 369.18         | 185.09           | 368.19         | 184.60           | G    | <b>1091.56</b> | 546.29          | 1074.54 | 537.77           | 1073.55        | 537.28           | 10 |
| 5  | 618.34         | 309.67          | 601.31         | 301.16           | 600.33         | 300.67           | K    | 1034.54        | 517.77          | 1017.51 | 509.26           | 1016.53        | 508.77           | 9  |
| 6  | 747.38         | 374.19          | 730.36         | 365.68           | 729.37         | 365.19           | E    | <b>802.41</b>  | 401.71          | 785.38  | 393.19           | 784.39         | 392.70           | 8  |
| 7  | <b>818.42</b>  | 409.71          | 801.39         | 401.20           | 800.41         | 400.71           | A    | <b>673.36</b>  | 337.19          | 656.34  | 328.67           | 655.35         | 328.18           | 7  |
| 8  | <b>933.45</b>  | 467.23          | 916.42         | 458.71           | 915.44         | 458.22           | D    | 602.33         | 301.67          | 585.30  | 293.15           | 584.32         | 292.66           | 6  |
| 9  | 1004.48        | 502.75          | 987.46         | 494.23           | 986.47         | 493.74           | A    | <b>487.30</b>  | 244.15          | 470.27  | 235.64           |                |                  | 5  |
| 10 | <b>1075.52</b> | 538.26          | <b>1058.49</b> | 529.75           | 1057.51        | 529.26           | A    | <b>416.26</b>  | 208.63          | 399.24  | 200.12           |                |                  | 4  |
| 11 | <b>1188.60</b> | 594.81          | 1171.58        | 586.29           | 1170.59        | 585.80           | L    | <b>345.22</b>  | 173.12          | 328.20  | 164.60           |                |                  | 3  |
| 12 | <b>1245.63</b> | 623.32          | 1228.60        | 614.80           | 1227.62        | 614.31           | G    | <b>232.14</b>  | 116.57          | 215.11  | 108.06           |                |                  | 2  |
| 13 |                |                 |                |                  |                |                  | R    | 175.12         | 88.06           | 158.09  | 79.55            |                |                  | 1  |

# serine hydroxymethyltransferase K346

# ANITVN<sup>Succ</sup>KNSVPNDPK

MS/MS Fragmentation of **ANITVNKNSVPNDPK**

Found in [gi170082161](#), serine hydroxymethyltransferase [Escherichia coli str. K-12 sut

Match to Query 12473: 1709.858674 from(855.936613,2+)

From data file xie021.dta

Click mouse within plot area to zoom in by factor of two about that point

Or,   to  Da

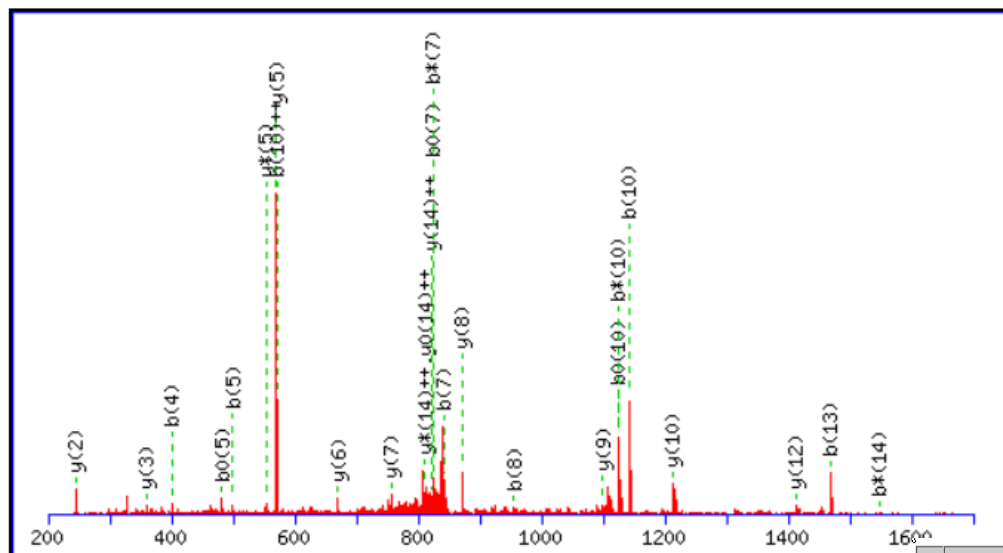

Monoisotopic mass of neutral peptide  $M_r(\text{calc})$ : 1709.86

Variable modifications:

K7 : Succinyl (K)

Ions Score: 39 Expect: 0.015

| #  | b       | b <sup>++</sup> | b <sup>*</sup> | b <sup>*++</sup> | b <sup>0</sup> | b <sup>0++</sup> | Seq. | y       | y <sup>++</sup> | y <sup>*</sup> | y <sup>*++</sup> | y <sup>0</sup> | y <sup>0++</sup> | #  |
|----|---------|-----------------|----------------|------------------|----------------|------------------|------|---------|-----------------|----------------|------------------|----------------|------------------|----|
| 1  | 72.04   | 36.53           |                |                  |                |                  | A    |         |                 |                |                  |                |                  | 15 |
| 2  | 186.09  | 93.55           | 169.06         | 85.03            |                |                  | N    | 1639.83 | 820.42          | 1622.80        | 811.90           | 1621.82        | 811.41           | 14 |
| 3  | 299.17  | 150.09          | 282.14         | 141.58           |                |                  | I    | 1525.79 | 763.40          | 1508.76        | 754.88           | 1507.78        | 754.39           | 13 |
| 4  | 400.22  | 200.61          | 383.19         | 192.10           | 382.21         | 191.61           | T    | 1412.70 | 706.85          | 1395.68        | 698.34           | 1394.69        | 697.85           | 12 |
| 5  | 499.29  | 250.15          | 482.26         | 241.63           | 481.28         | 241.14           | V    | 1311.65 | 656.33          | 1294.63        | 647.82           | 1293.64        | 647.33           | 11 |
| 6  | 613.33  | 307.17          | 596.30         | 298.66           | 595.32         | 298.16           | N    | 1212.59 | 606.80          | 1195.56        | 598.28           | 1194.57        | 597.79           | 10 |
| 7  | 841.44  | 421.22          | 824.41         | 412.71           | 823.43         | 412.22           | K    | 1098.54 | 549.77          | 1081.52        | 541.26           | 1080.53        | 540.77           | 9  |
| 8  | 955.48  | 478.25          | 938.46         | 469.73           | 937.47         | 469.24           | N    | 870.43  | 435.72          | 853.41         | 427.21           | 852.42         | 426.71           | 8  |
| 9  | 1042.52 | 521.76          | 1025.49        | 513.25           | 1024.51        | 512.76           | S    | 756.39  | 378.70          | 739.36         | 370.18           | 738.38         | 369.69           | 7  |
| 10 | 1141.58 | 571.30          | 1124.56        | 562.78           | 1123.57        | 562.29           | V    | 669.36  | 335.18          | 652.33         | 326.67           | 651.35         | 326.18           | 6  |
| 11 | 1238.64 | 619.82          | 1221.61        | 611.31           | 1220.63        | 610.82           | P    | 570.29  | 285.65          | 553.26         | 277.13           | 552.28         | 276.64           | 5  |
| 12 | 1352.68 | 676.84          | 1335.65        | 668.33           | 1334.67        | 667.84           | N    | 473.24  | 237.12          | 456.21         | 228.61           | 455.22         | 228.12           | 4  |
| 13 | 1467.71 | 734.36          | 1450.68        | 725.84           | 1449.70        | 725.35           | D    | 359.19  | 180.10          | 342.17         | 171.59           | 341.18         | 171.09           | 3  |
| 14 | 1564.76 | 782.88          | 1547.73        | 774.37           | 1546.75        | 773.88           | P    | 244.17  | 122.59          | 227.14         | 114.07           |                |                  | 2  |
| 15 |         |                 |                |                  |                |                  | K    | 147.11  | 74.06           | 130.09         | 65.55            |                |                  | 1  |

# serine hydroxymethyltransferase K346

# ANITVN<sup>Succ-D4</sup>KNSVPNDPK

MS/MS Fragmentation of **ANITVNKNSVPNDPK**

Found in **gij170082161**, serine hydroxymethyltransferase [Escherichia coli str. K-12 sul

Match to Query 12514: 1713.881134 from(857.947843,2+)

From data file xie021.dta

Click mouse within plot area to zoom in by factor of two about that point

Or,   to  Da

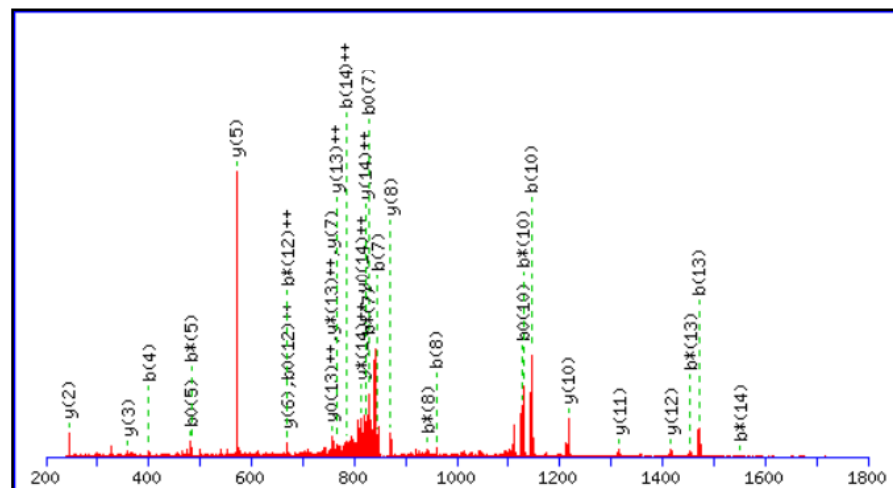

Monoisotopic mass of neutral peptide Mr(calc): 1713.88

Variable modifications:

K7 : Succinyl (K-D4)

Ions Score: 31 Expect: 0.082

| #  | b              | b <sup>++</sup> | b*             | b <sup>*++</sup> | b <sup>0</sup> | b <sup>0++</sup> | Seq. | y              | y <sup>++</sup> | y*      | y <sup>*++</sup> | y <sup>0</sup> | y <sup>0++</sup> | #  |
|----|----------------|-----------------|----------------|------------------|----------------|------------------|------|----------------|-----------------|---------|------------------|----------------|------------------|----|
| 1  | 72.04          | 36.53           |                |                  |                |                  | A    |                |                 |         |                  |                |                  | 15 |
| 2  | 186.09         | 93.55           | 169.06         | 85.03            |                |                  | N    | 1643.85        | <b>822.43</b>   | 1626.83 | <b>813.92</b>    | 1625.84        | <b>813.43</b>    | 14 |
| 3  | 299.17         | 150.09          | 282.14         | 141.58           |                |                  | I    | 1529.81        | <b>765.41</b>   | 1512.78 | <b>756.90</b>    | 1511.80        | <b>756.40</b>    | 13 |
| 4  | <b>400.22</b>  | 200.61          | 383.19         | 192.10           | 382.21         | 191.61           | T    | <b>1416.73</b> | 708.87          | 1399.70 | 700.35           | 1398.72        | 699.86           | 12 |
| 5  | 499.29         | 250.15          | <b>482.26</b>  | 241.63           | <b>481.28</b>  | 241.14           | V    | <b>1315.68</b> | 658.34          | 1298.65 | 649.83           | 1297.67        | 649.34           | 11 |
| 6  | 613.33         | 307.17          | 596.30         | 298.66           | 595.32         | 298.16           | N    | <b>1216.61</b> | 608.81          | 1199.58 | 600.30           | 1198.60        | 599.80           | 10 |
| 7  | <b>845.47</b>  | 423.24          | <b>828.44</b>  | 414.72           | <b>827.46</b>  | 414.23           | K    | 1102.57        | 551.79          | 1085.54 | 543.27           | 1084.56        | 542.78           | 9  |
| 8  | <b>959.51</b>  | 480.26          | <b>942.48</b>  | 471.75           | 941.50         | 471.25           | N    | <b>870.43</b>  | 435.72          | 853.41  | 427.21           | 852.42         | 426.71           | 8  |
| 9  | 1046.54        | 523.77          | 1029.51        | 515.26           | 1028.53        | 514.77           | S    | <b>756.39</b>  | 378.70          | 739.36  | 370.18           | 738.38         | 369.69           | 7  |
| 10 | <b>1145.61</b> | 573.31          | <b>1128.58</b> | 564.80           | <b>1127.60</b> | 564.30           | V    | <b>669.36</b>  | 335.18          | 652.33  | 326.67           | 651.35         | 326.18           | 6  |
| 11 | 1242.66        | 621.83          | 1225.64        | 613.32           | 1224.65        | 612.83           | P    | <b>570.29</b>  | 285.65          | 553.26  | 277.13           | 552.28         | 276.64           | 5  |
| 12 | 1356.71        | 678.86          | 1339.68        | <b>670.34</b>    | 1338.70        | <b>669.85</b>    | N    | 473.24         | 237.12          | 456.21  | 228.61           | 455.22         | 228.12           | 4  |
| 13 | <b>1471.73</b> | 736.37          | <b>1454.71</b> | 727.86           | 1453.72        | 727.36           | D    | <b>359.19</b>  | 180.10          | 342.17  | 171.59           | 341.18         | 171.09           | 3  |
| 14 | 1568.79        | <b>784.90</b>   | <b>1551.76</b> | 776.38           | 1550.77        | 775.89           | P    | <b>244.17</b>  | 122.59          | 227.14  | 114.07           |                |                  | 2  |
| 15 |                |                 |                |                  |                |                  | K    | 147.11         | 74.06           | 130.09  | 65.55            |                |                  | 1  |

# glyceraldehyde-3-phosphate dehydrogenase A K124 VVMTGPS<sup>Succ</sup>KDNTPMFVK

MS/MS Fragmentation of **VVMTGPSKDNTPMFVK**

Found in **gi|170081435**, glyceraldehyde-3-phosphate dehydrogenase A [Escherichia co

Match to Query 13991: 1849.900424 from(925.957488,2+)

From data file xie021.dta

Click mouse within plot area to zoom in by factor of two about that point

Or, Plot from  to  Da

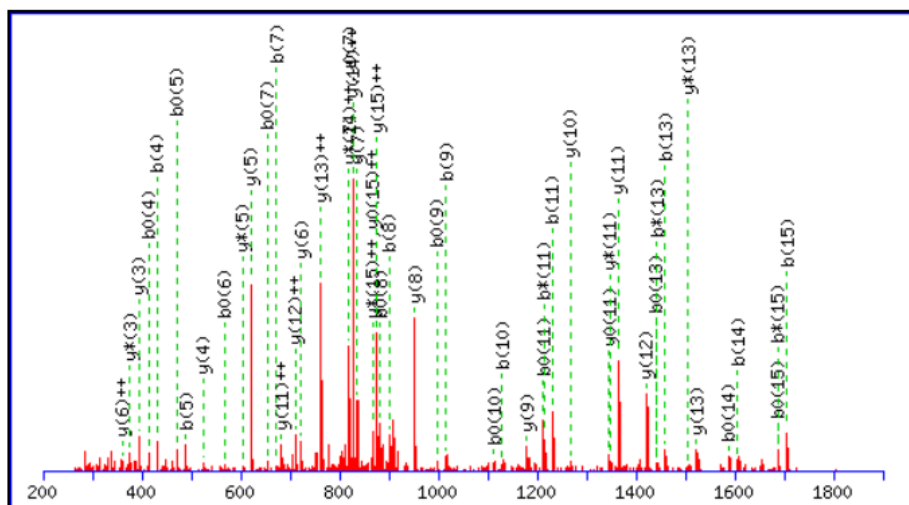

Monoisotopic mass of neutral peptide Mr(calc): 1849.90

Variable modifications:

K8 : Succinyl (K)

Ions Score: 39 Expect: 0.015

| #  | b       | b <sup>++</sup> | b <sup>*</sup> | b <sup>*++</sup> | b <sup>0</sup> | b <sup>0++</sup> | Seq. | y       | y <sup>++</sup> | y <sup>*</sup> | y <sup>*++</sup> | y <sup>0</sup> | y <sup>0++</sup> | #  |
|----|---------|-----------------|----------------|------------------|----------------|------------------|------|---------|-----------------|----------------|------------------|----------------|------------------|----|
| 1  | 100.08  | 50.54           |                |                  |                |                  | V    |         |                 |                |                  |                |                  | 16 |
| 2  | 199.14  | 100.08          |                |                  |                |                  | V    | 1751.83 | 876.42          | 1734.81        | 867.91           | 1733.82        | 867.42           | 15 |
| 3  | 330.18  | 165.60          |                |                  |                |                  | M    | 1652.77 | 826.89          | 1635.74        | 818.37           | 1634.76        | 817.88           | 14 |
| 4  | 431.23  | 216.12          |                |                  | 413.22         | 207.11           | T    | 1521.73 | 761.37          | 1504.70        | 752.85           | 1503.71        | 752.36           | 13 |
| 5  | 488.25  | 244.63          |                |                  | 470.24         | 235.63           | G    | 1420.68 | 710.84          | 1403.65        | 702.33           | 1402.67        | 701.84           | 12 |
| 6  | 585.31  | 293.16          |                |                  | 567.30         | 284.15           | P    | 1363.66 | 682.33          | 1346.63        | 673.82           | 1345.65        | 673.33           | 11 |
| 7  | 672.34  | 336.67          |                |                  | 654.33         | 327.67           | S    | 1266.60 | 633.81          | 1249.58        | 625.29           | 1248.59        | 624.80           | 10 |
| 8  | 900.45  | 450.73          | 883.42         | 442.22           | 882.44         | 441.72           | K    | 1179.57 | 590.29          | 1162.54        | 581.78           | 1161.56        | 581.28           | 9  |
| 9  | 1015.48 | 508.24          | 998.45         | 499.73           | 997.47         | 499.24           | D    | 951.46  | 476.23          | 934.43         | 467.72           | 933.45         | 467.23           | 8  |
| 10 | 1129.52 | 565.26          | 1112.49        | 556.75           | 1111.51        | 556.26           | N    | 836.43  | 418.72          | 819.41         | 410.21           | 818.42         | 409.72           | 7  |
| 11 | 1230.57 | 615.79          | 1213.54        | 607.27           | 1212.56        | 606.78           | T    | 722.39  | 361.70          | 705.36         | 353.19           | 704.38         | 352.69           | 6  |
| 12 | 1327.62 | 664.31          | 1310.59        | 655.80           | 1309.61        | 655.31           | P    | 621.34  | 311.18          | 604.32         | 302.66           |                |                  | 5  |
| 13 | 1458.66 | 729.83          | 1441.63        | 721.32           | 1440.65        | 720.83           | M    | 524.29  | 262.65          | 507.26         | 254.14           |                |                  | 4  |
| 14 | 1605.73 | 803.37          | 1588.70        | 794.85           | 1587.72        | 794.36           | F    | 393.25  | 197.13          | 376.22         | 188.62           |                |                  | 3  |
| 15 | 1704.80 | 852.90          | 1687.77        | 844.39           | 1686.79        | 843.90           | V    | 246.18  | 123.59          | 229.15         | 115.08           |                |                  | 2  |
| 16 |         |                 |                |                  |                |                  | K    | 147.11  | 74.06           | 130.09         | 65.55            |                |                  | 1  |



# glyceraldehyde-3-phosphate dehydrogenase A K124 VVMTGPS<sup>Succ-D4</sup>KDNTPMFVK

MS/MS Fragmentation of **VVMTGPSKDNTPMFVK**

Found in [gi170081435](#), glyceraldehyde-3-phosphate dehydrogenase A [Escherichia coli]

Match to Query 14023: 1853.923014 from(927.968783,2+)

From data file xie021.dta

Click mouse within plot area to zoom in by factor of two about that point

Or,   to  Da

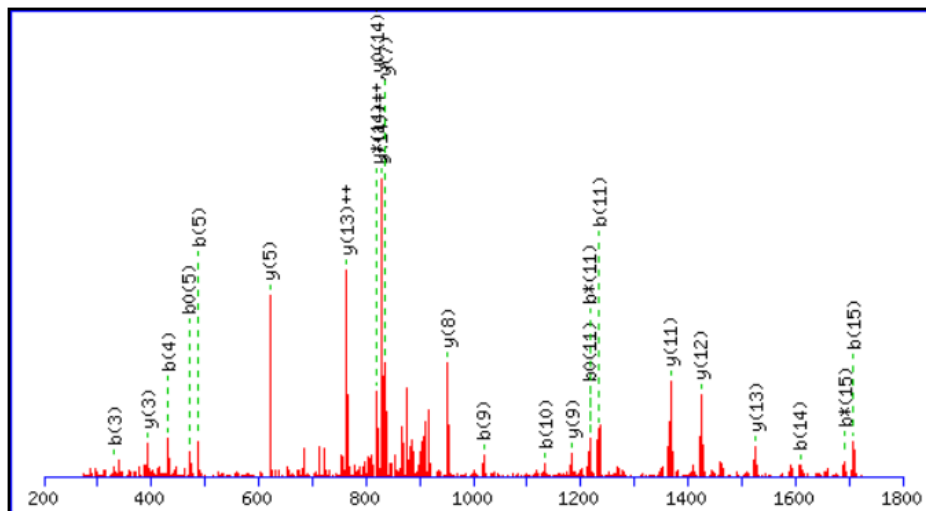

Monoisotopic mass of neutral peptide  $M_r(\text{calc})$ : 1853.92

Variable modifications:

K8 : Succinyl (K-D4)

Ions Score: 43 Expect: 0.0054

| #  | b              | b <sup>++</sup> | b <sup>*</sup> | b <sup>*++</sup> | b <sup>0</sup> | b <sup>0++</sup> | Seq. | y              | y <sup>++</sup> | y <sup>*</sup> | y <sup>*++</sup> | y <sup>0</sup> | y <sup>0++</sup> | #  |
|----|----------------|-----------------|----------------|------------------|----------------|------------------|------|----------------|-----------------|----------------|------------------|----------------|------------------|----|
| 1  | 100.08         | 50.54           |                |                  |                |                  | V    |                |                 |                |                  |                |                  | 16 |
| 2  | 199.14         | 100.08          |                |                  |                |                  | V    | 1755.86        | 878.43          | 1738.83        | 869.92           | 1737.85        | 869.43           | 15 |
| 3  | <b>330.18</b>  | 165.60          |                |                  |                |                  | M    | 1656.79        | <b>828.90</b>   | 1639.76        | <b>820.39</b>    | 1638.78        | <b>819.89</b>    | 14 |
| 4  | <b>431.23</b>  | 216.12          |                |                  | 413.22         | 207.11           | T    | <b>1525.75</b> | <b>763.38</b>   | 1508.72        | 754.87           | 1507.74        | 754.37           | 13 |
| 5  | <b>488.25</b>  | 244.63          |                |                  | <b>470.24</b>  | 235.63           | G    | <b>1424.70</b> | 712.86          | 1407.68        | 704.34           | 1406.69        | 703.85           | 12 |
| 6  | 585.31         | 293.16          |                |                  | 567.30         | 284.15           | P    | <b>1367.68</b> | 684.34          | 1350.65        | 675.83           | 1349.67        | 675.34           | 11 |
| 7  | 672.34         | 336.67          |                |                  | 654.33         | 327.67           | S    | 1270.63        | 635.82          | 1253.60        | 627.30           | 1252.62        | 626.81           | 10 |
| 8  | 904.47         | 452.74          | 887.45         | 444.23           | 886.46         | 443.74           | K    | <b>1183.60</b> | 592.30          | 1166.57        | 583.79           | 1165.59        | 583.30           | 9  |
| 9  | <b>1019.50</b> | 510.25          | 1002.48        | 501.74           | 1001.49        | 501.25           | D    | <b>951.46</b>  | 476.23          | 934.43         | 467.72           | 933.45         | 467.23           | 8  |
| 10 | <b>1133.54</b> | 567.28          | 1116.52        | 558.76           | 1115.53        | 558.27           | N    | <b>836.43</b>  | 418.72          | 819.41         | 410.21           | 818.42         | 409.72           | 7  |
| 11 | <b>1234.59</b> | 617.80          | <b>1217.57</b> | 609.29           | <b>1216.58</b> | 608.79           | T    | 722.39         | 361.70          | 705.36         | 353.19           | 704.38         | 352.69           | 6  |
| 12 | 1331.64        | 666.33          | 1314.62        | 657.81           | 1313.63        | 657.32           | P    | <b>621.34</b>  | 311.18          | 604.32         | 302.66           |                |                  | 5  |
| 13 | 1462.69        | 731.85          | 1445.66        | 723.33           | 1444.67        | 722.84           | M    | 524.29         | 262.65          | 507.26         | 254.14           |                |                  | 4  |
| 14 | <b>1609.75</b> | 805.38          | 1592.73        | 796.87           | 1591.74        | 796.38           | F    | <b>393.25</b>  | 197.13          | 376.22         | 188.62           |                |                  | 3  |
| 15 | <b>1708.82</b> | 854.91          | <b>1691.80</b> | 846.40           | 1690.81        | 845.91           | V    | 246.18         | 123.59          | 229.15         | 115.08           |                |                  | 2  |
| 16 |                |                 |                |                  |                |                  | K    | 147.11         | 74.06           | 130.09         | 65.55            |                |                  | 1  |

# glyceraldehyde-3-phosphate dehydrogenase A K132

DNTPMFV<sup>Succ</sup>KGANFDK

MS/MS Fragmentation of **DNTPMFVKGANFDK**

Found in **gij170081435**, glyceraldehyde-3-phosphate dehydrogenase A [Escherichia cc

Match to Query 12140: 1682.763224 from(842.388888,2+)

From data file xie021.dta

Click mouse within plot area to zoom in by factor of two about that point

Or,   to  Da

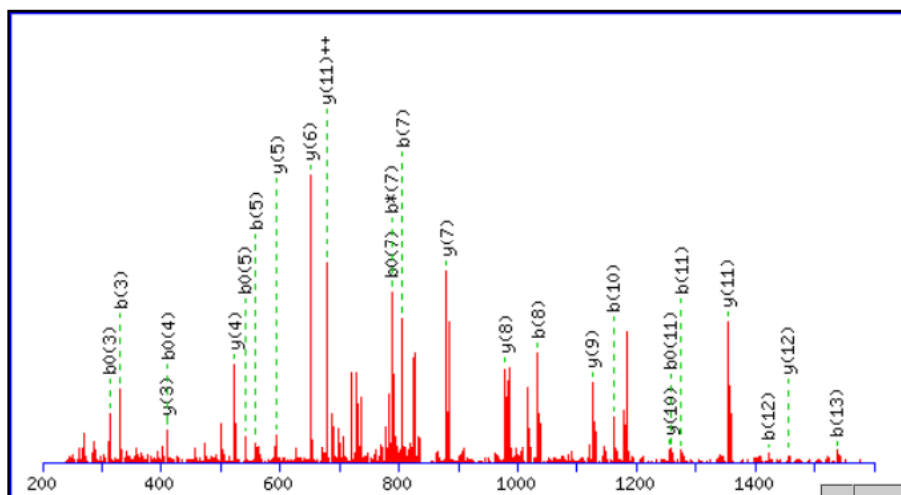

Monoisotopic mass of neutral peptide Mr(calc): 1682.76

Variable modifications:

K8 : Succinyl (K)

Ions Score: 57 Expect: 0.00021

| #  | b              | b <sup>++</sup> | b*            | b <sup>*++</sup> | b <sup>0</sup> | b <sup>0++</sup> | Seq. | y              | y <sup>++</sup> | y*      | y <sup>*++</sup> | y <sup>0</sup> | y <sup>0++</sup> | #  |
|----|----------------|-----------------|---------------|------------------|----------------|------------------|------|----------------|-----------------|---------|------------------|----------------|------------------|----|
| 1  | 116.03         | 58.52           |               |                  | 98.02          | 49.52            | D    |                |                 |         |                  |                |                  | 14 |
| 2  | 230.08         | 115.54          | 213.05        | 107.03           | 212.07         | 106.54           | N    | 1568.74        | 784.87          | 1551.71 | 776.36           | 1550.73        | 775.87           | 13 |
| 3  | <b>331.12</b>  | 166.07          | 314.10        | 157.55           | <b>313.11</b>  | 157.06           | T    | <b>1454.70</b> | 727.85          | 1437.67 | 719.34           | 1436.69        | 718.85           | 12 |
| 4  | 428.18         | 214.59          | 411.15        | 206.08           | <b>410.17</b>  | 205.59           | P    | <b>1353.65</b> | <b>677.33</b>   | 1336.62 | 668.82           | 1335.64        | 668.32           | 11 |
| 5  | <b>559.22</b>  | 280.11          | 542.19        | 271.60           | <b>541.21</b>  | 271.11           | M    | <b>1256.60</b> | 628.80          | 1239.57 | 620.29           | 1238.59        | 619.80           | 10 |
| 6  | 706.29         | 353.65          | 689.26        | 345.13           | 688.28         | 344.64           | F    | <b>1125.56</b> | 563.28          | 1108.53 | 554.77           | 1107.55        | 554.28           | 9  |
| 7  | <b>805.35</b>  | 403.18          | <b>788.33</b> | 394.67           | <b>787.34</b>  | 394.18           | V    | <b>978.49</b>  | 489.75          | 961.46  | 481.23           | 960.48         | 480.74           | 8  |
| 8  | <b>1033.47</b> | 517.24          | 1016.44       | 508.72           | 1015.46        | 508.23           | K    | <b>879.42</b>  | 440.21          | 862.39  | 431.70           | 861.41         | 431.21           | 7  |
| 9  | 1090.49        | 545.75          | 1073.46       | 537.23           | 1072.48        | 536.74           | G    | <b>651.31</b>  | 326.16          | 634.28  | 317.65           | 633.30         | 317.15           | 6  |
| 10 | <b>1161.52</b> | 581.27          | 1144.50       | 572.75           | 1143.51        | 572.26           | A    | <b>594.29</b>  | 297.65          | 577.26  | 289.13           | 576.28         | 288.64           | 5  |
| 11 | <b>1275.57</b> | 638.29          | 1258.54       | 629.77           | <b>1257.56</b> | 629.28           | N    | <b>523.25</b>  | 262.13          | 506.22  | 253.62           | 505.24         | 253.12           | 4  |
| 12 | <b>1422.64</b> | 711.82          | 1405.61       | 703.31           | 1404.63        | 702.82           | F    | <b>409.21</b>  | 205.11          | 392.18  | 196.59           | 391.20         | 196.10           | 3  |
| 13 | <b>1537.66</b> | 769.34          | 1520.64       | 760.82           | 1519.65        | 760.33           | D    | 262.14         | 131.57          | 245.11  | 123.06           | 244.13         | 122.57           | 2  |
| 14 |                |                 |               |                  |                |                  | K    | 147.11         | 74.06           | 130.09  | 65.55            |                |                  | 1  |

# glyceraldehyde-3-phosphate dehydrogenase A K132 DNTPMFV<sup>Succ-D4</sup>KGANFDK

MS/MS Fragmentation of **DNTPMFVKGANFDK**

Found in **gi170081435**, glyceraldehyde-3-phosphate dehydrogenase A [Escherichia coli]

Match to Query 12193: 1686.788734 from(844.401643,2+)

From data file xie021.dta

Click mouse within plot area to zoom in by factor of two about that point

Or,   to  Da

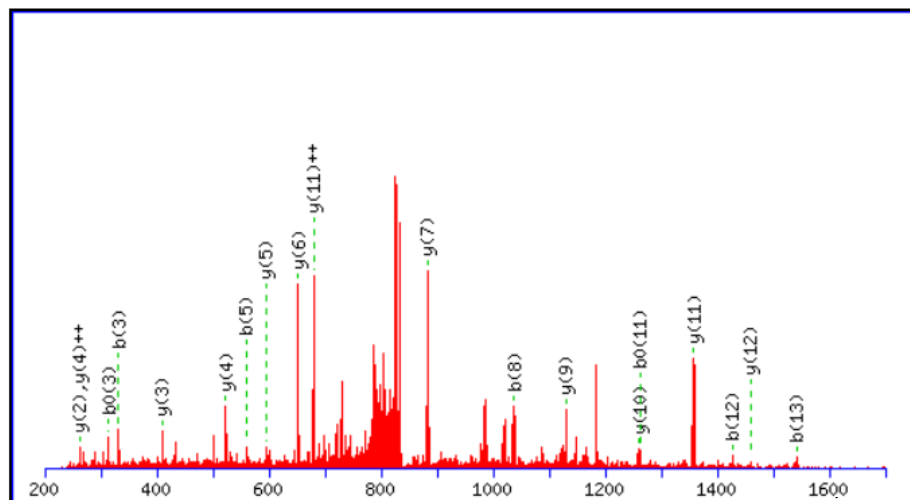

Monoisotopic mass of neutral peptide  $M_r(\text{calc})$ : 1686.79

Variable modifications:

K8 : Succinyl (K-D4)

Ions Score: 66 Expect: 3e-005

| #  | b              | b <sup>++</sup> | b*      | b <sup>*++</sup> | b <sup>0</sup> | b <sup>0++</sup> | Seq. | y              | y <sup>++</sup> | y*      | y <sup>*++</sup> | y <sup>0</sup> | y <sup>0++</sup> | #  |
|----|----------------|-----------------|---------|------------------|----------------|------------------|------|----------------|-----------------|---------|------------------|----------------|------------------|----|
| 1  | 116.03         | 58.52           |         |                  | 98.02          | 49.52            | D    |                |                 |         |                  |                |                  | 14 |
| 2  | 230.08         | 115.54          | 213.05  | 107.03           | 212.07         | 106.54           | N    | 1572.77        | 786.89          | 1555.74 | 778.37           | 1554.76        | 777.88           | 13 |
| 3  | <b>331.12</b>  | 166.07          | 314.10  | 157.55           | <b>313.11</b>  | 157.06           | T    | <b>1458.72</b> | 729.87          | 1441.70 | 721.35           | 1440.71        | 720.86           | 12 |
| 4  | 428.18         | 214.59          | 411.15  | 206.08           | 410.17         | 205.59           | P    | <b>1357.68</b> | <b>679.34</b>   | 1340.65 | 670.83           | 1339.67        | 670.34           | 11 |
| 5  | <b>559.22</b>  | 280.11          | 542.19  | 271.60           | 541.21         | 271.11           | M    | <b>1260.62</b> | 630.82          | 1243.60 | 622.30           | 1242.61        | 621.81           | 10 |
| 6  | 706.29         | 353.65          | 689.26  | 345.13           | 688.28         | 344.64           | F    | <b>1129.58</b> | 565.29          | 1112.56 | 556.78           | 1111.57        | 556.29           | 9  |
| 7  | 805.35         | 403.18          | 788.33  | 394.67           | 787.34         | 394.18           | V    | 982.51         | 491.76          | 965.49  | 483.25           | 964.50         | 482.76           | 8  |
| 8  | <b>1037.49</b> | 519.25          | 1020.46 | 510.74           | 1019.48        | 510.24           | K    | <b>883.45</b>  | 442.23          | 866.42  | 433.71           | 865.44         | 433.22           | 7  |
| 9  | 1094.51        | 547.76          | 1077.49 | 539.25           | 1076.50        | 538.75           | G    | <b>651.31</b>  | 326.16          | 634.28  | 317.65           | 633.30         | 317.15           | 6  |
| 10 | 1165.55        | 583.28          | 1148.52 | 574.77           | 1147.54        | 574.27           | A    | <b>594.29</b>  | 297.65          | 577.26  | 289.13           | 576.28         | 288.64           | 5  |
| 11 | 1279.59        | 640.30          | 1262.57 | 631.79           | <b>1261.58</b> | 631.29           | N    | <b>523.25</b>  | <b>262.13</b>   | 506.22  | 253.62           | 505.24         | 253.12           | 4  |
| 12 | <b>1426.66</b> | 713.83          | 1409.63 | 705.32           | 1408.65        | 704.83           | F    | <b>409.21</b>  | 205.11          | 392.18  | 196.59           | 391.20         | 196.10           | 3  |
| 13 | <b>1541.69</b> | 771.35          | 1524.66 | 762.83           | 1523.68        | 762.34           | D    | <b>262.14</b>  | 131.57          | 245.11  | 123.06           | 244.13         | 122.57           | 2  |
| 14 |                |                 |         |                  |                |                  | K    | 147.11         | 74.06           | 130.09  | 65.55            |                |                  | 1  |

# glyceraldehyde-3-phosphate dehydrogenase A K213 GASQNIIPSSTGAA<sup>Succ</sup>KAVGK

MS/MS Fragmentation of **GASQNIIPSSTGAAKAVGK**

Found in [gij170081435](#), glyceraldehyde-3-phosphate dehydrogenase A [Escherichia coli]

Match to Query 14038: 1855.965244 from(928.989898,2+)

From data file xie021.dta

Click mouse within plot area to zoom in by factor of two about that point

Or,   to  Da

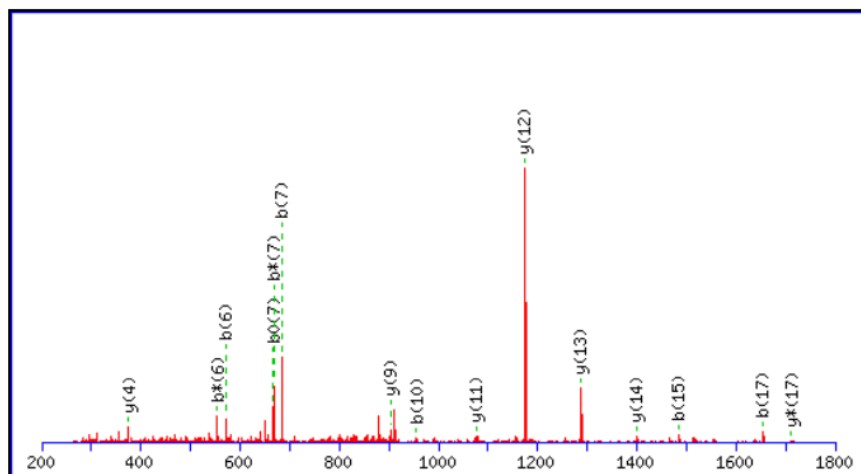

Monoisotopic mass of neutral peptide Mr(calc): 1855.96

Variable modifications:

K15 : Succinyl (K)

Ions Score: 33 Expect: 0.055

| #  | b              | b <sup>++</sup> | b*            | b <sup>*++</sup> | b <sup>0</sup> | b <sup>0++</sup> | Seq.     | y              | y <sup>++</sup> | y*             | y <sup>*++</sup> | y <sup>0</sup> | y <sup>0++</sup> | #         |
|----|----------------|-----------------|---------------|------------------|----------------|------------------|----------|----------------|-----------------|----------------|------------------|----------------|------------------|-----------|
| 1  | 58.03          | 29.52           |               |                  |                |                  | <b>G</b> |                |                 |                |                  |                |                  | <b>19</b> |
| 2  | 129.07         | 65.04           |               |                  |                |                  | <b>A</b> | 1799.95        | 900.48          | 1782.92        | 891.97           | 1781.94        | 891.47           | <b>18</b> |
| 3  | 216.10         | 108.55          |               |                  | 198.09         | 99.55            | <b>S</b> | 1728.91        | 864.96          | <b>1711.89</b> | 856.45           | 1710.90        | 855.95           | <b>17</b> |
| 4  | 344.16         | 172.58          | 327.13        | 164.07           | 326.15         | 163.58           | <b>Q</b> | 1641.88        | 821.44          | 1624.85        | 812.93           | 1623.87        | 812.44           | <b>16</b> |
| 5  | 458.20         | 229.60          | 441.17        | 221.09           | 440.19         | 220.60           | <b>N</b> | 1513.82        | 757.41          | 1496.80        | 748.90           | 1495.81        | 748.41           | <b>15</b> |
| 6  | <b>571.28</b>  | 286.15          | <b>554.26</b> | 277.63           | 553.27         | 277.14           | <b>I</b> | <b>1399.78</b> | 700.39          | 1382.75        | 691.88           | 1381.77        | 691.39           | <b>14</b> |
| 7  | <b>684.37</b>  | 342.69          | <b>667.34</b> | 334.17           | <b>666.36</b>  | 333.68           | <b>I</b> | <b>1286.70</b> | 643.85          | 1269.67        | 635.34           | 1268.68        | 634.85           | <b>13</b> |
| 8  | 781.42         | 391.21          | 764.39        | 382.70           | 763.41         | 382.21           | <b>P</b> | <b>1173.61</b> | 587.31          | 1156.58        | 578.80           | 1155.60        | 578.30           | <b>12</b> |
| 9  | 868.45         | 434.73          | 851.43        | 426.22           | 850.44         | 425.72           | <b>S</b> | <b>1076.56</b> | 538.78          | 1059.53        | 530.27           | 1058.55        | 529.78           | <b>11</b> |
| 10 | <b>955.48</b>  | 478.25          | 938.46        | 469.73           | 937.47         | 469.24           | <b>S</b> | 989.53         | 495.27          | 972.50         | 486.75           | 971.52         | 486.26           | <b>10</b> |
| 11 | 1056.53        | 528.77          | 1039.51       | 520.26           | 1038.52        | 519.76           | <b>T</b> | <b>902.49</b>  | 451.75          | 885.47         | 443.24           | 884.48         | 442.75           | <b>9</b>  |
| 12 | 1113.55        | 557.28          | 1096.53       | 548.77           | 1095.54        | 548.28           | <b>G</b> | 801.45         | 401.23          | 784.42         | 392.71           |                |                  | <b>8</b>  |
| 13 | 1184.59        | 592.80          | 1167.56       | 584.29           | 1166.58        | 583.79           | <b>A</b> | 744.43         | 372.72          | 727.40         | 364.20           |                |                  | <b>7</b>  |
| 14 | 1255.63        | 628.32          | 1238.60       | 619.80           | 1237.62        | 619.31           | <b>A</b> | 673.39         | 337.20          | 656.36         | 328.68           |                |                  | <b>6</b>  |
| 15 | <b>1483.74</b> | 742.37          | 1466.71       | 733.86           | 1465.73        | 733.37           | <b>K</b> | 602.35         | 301.68          | 585.32         | 293.17           |                |                  | <b>5</b>  |
| 16 | 1554.78        | 777.89          | 1537.75       | 769.38           | 1536.77        | 768.89           | <b>A</b> | <b>374.24</b>  | 187.62          | 357.21         | 179.11           |                |                  | <b>4</b>  |
| 17 | <b>1653.84</b> | 827.43          | 1636.82       | 818.91           | 1635.83        | 818.42           | <b>V</b> | 303.20         | 152.10          | 286.18         | 143.59           |                |                  | <b>3</b>  |
| 18 | 1710.87        | 855.94          | 1693.84       | 847.42           | 1692.86        | 846.93           | <b>G</b> | 204.13         | 102.57          | 187.11         | 94.06            |                |                  | <b>2</b>  |
| 19 |                |                 |               |                  |                |                  | <b>K</b> | 147.11         | 74.06           | 130.09         | 65.55            |                |                  | <b>1</b>  |

# glyceraldehyde-3-phosphate dehydrogenase AK213 GASQNIIPSSTGAA<sup>Succ-D4</sup>KAVGK

## MS/MS Fragmentation of **GASQNIIPSSTGAAKAVGK**

Found in **gi|170081435**, glyceraldehyde-3-phosphate dehydrogenase A [Escherichia coli]

Match to Query 14067: 1859.990514 from(931.002533,2+)

From data file xie021.dta

Click mouse within plot area to zoom in by factor of two about that point

Or,   to  Da

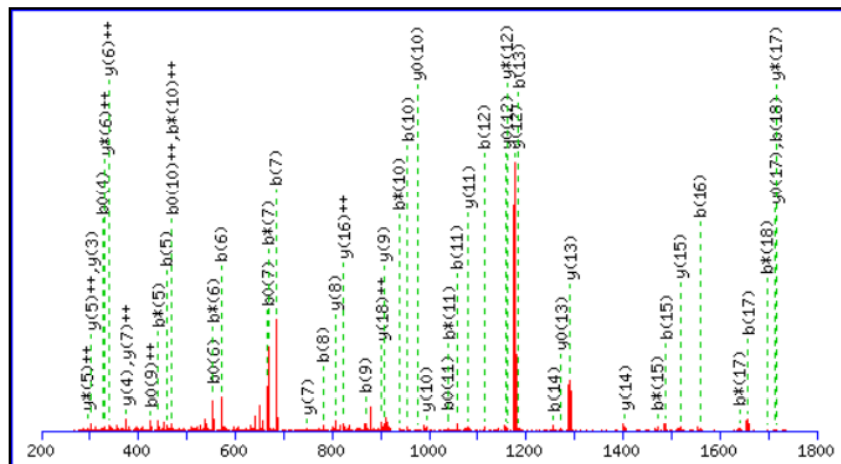

Monoisotopic mass of neutral peptide  $M_r(\text{calc})$ : 1859.99

Variable modifications:

K15 : Succinyl (K-D4)

Ions Score: 41 Expect: 0.01

| #  | b              | b <sup>++</sup> | b <sup>*</sup> | b <sup>*++</sup> | b <sup>0</sup> | b <sup>0++</sup> | Seq. | y              | y <sup>++</sup> | y <sup>*</sup> | y <sup>*++</sup> | y <sup>0</sup> | y <sup>0++</sup> | #  |
|----|----------------|-----------------|----------------|------------------|----------------|------------------|------|----------------|-----------------|----------------|------------------|----------------|------------------|----|
| 1  | 58.03          | 29.52           |                |                  |                |                  | G    |                |                 |                |                  |                |                  | 19 |
| 2  | 129.07         | 65.04           |                |                  |                |                  | A    | 1803.97        | <b>902.49</b>   | 1786.95        | 893.98           | 1785.96        | 893.49           | 18 |
| 3  | 216.10         | 108.55          |                |                  | 198.09         | 99.55            | S    | 1732.94        | 866.97          | <b>1715.91</b> | 858.46           | <b>1714.93</b> | 857.97           | 17 |
| 4  | 344.16         | 172.58          | 327.13         | 164.07           | <b>326.15</b>  | 163.58           | Q    | 1645.91        | <b>823.46</b>   | 1628.88        | 814.94           | 1627.90        | 814.45           | 16 |
| 5  | <b>458.20</b>  | 229.60          | <b>441.17</b>  | 221.09           | 440.19         | 220.60           | N    | <b>1517.85</b> | 759.43          | 1500.82        | 750.91           | 1499.84        | 750.42           | 15 |
| 6  | <b>571.28</b>  | 286.15          | <b>554.26</b>  | 277.63           | <b>553.27</b>  | 277.14           | I    | <b>1403.80</b> | 702.41          | 1386.78        | 693.89           | 1385.79        | 693.40           | 14 |
| 7  | <b>684.37</b>  | 342.69          | <b>667.34</b>  | 334.17           | <b>666.36</b>  | 333.68           | I    | <b>1290.72</b> | 645.86          | 1273.69        | 637.35           | <b>1272.71</b> | 636.86           | 13 |
| 8  | <b>781.42</b>  | 391.21          | 764.39         | 382.70           | 763.41         | 382.21           | P    | <b>1177.64</b> | 589.32          | <b>1160.61</b> | 580.81           | <b>1159.63</b> | 580.32           | 12 |
| 9  | <b>868.45</b>  | 434.73          | 851.43         | 426.22           | 850.44         | <b>425.72</b>    | S    | <b>1080.58</b> | 540.80          | 1063.56        | 532.28           | 1062.57        | 531.79           | 11 |
| 10 | <b>955.48</b>  | 478.25          | <b>938.46</b>  | <b>469.73</b>    | 937.47         | <b>469.24</b>    | S    | <b>993.55</b>  | 497.28          | 976.52         | 488.77           | <b>975.54</b>  | 488.27           | 10 |
| 11 | <b>1056.53</b> | 528.77          | <b>1039.51</b> | 520.26           | <b>1038.52</b> | 519.76           | T    | <b>906.52</b>  | 453.76          | 889.49         | 445.25           | 888.51         | 444.76           | 9  |
| 12 | <b>1113.55</b> | 557.28          | 1096.53        | 548.77           | 1095.54        | 548.28           | G    | <b>805.47</b>  | 403.24          | 788.45         | 394.73           |                |                  | 8  |
| 13 | <b>1184.59</b> | 592.80          | 1167.56        | 584.29           | 1166.58        | 583.79           | A    | <b>748.45</b>  | <b>374.73</b>   | 731.42         | 366.22           |                |                  | 7  |
| 14 | <b>1255.63</b> | 628.32          | 1238.60        | 619.80           | 1237.62        | 619.31           | A    | 677.41         | <b>339.21</b>   | 660.39         | <b>330.70</b>    |                |                  | 6  |
| 15 | <b>1487.76</b> | 744.39          | <b>1470.74</b> | 735.87           | 1469.75        | 735.38           | K    | 606.38         | <b>303.69</b>   | 589.35         | <b>295.18</b>    |                |                  | 5  |
| 16 | <b>1558.80</b> | 779.90          | 1541.77        | 771.39           | 1540.79        | 770.90           | A    | <b>374.24</b>  | 187.62          | 357.21         | 179.11           |                |                  | 4  |
| 17 | <b>1657.87</b> | 829.44          | <b>1640.84</b> | 820.93           | 1639.86        | 820.43           | V    | <b>303.20</b>  | 152.10          | 286.18         | 143.59           |                |                  | 3  |
| 18 | <b>1714.89</b> | 857.95          | <b>1697.86</b> | 849.44           | 1696.88        | 848.94           | G    | 204.13         | 102.57          | 187.11         | 94.06            |                |                  | 2  |
| 19 |                |                 |                |                  |                |                  | K    | 147.11         | 74.06           | 130.09         | 65.55            |                |                  | 1  |

# glyceraldehyde-3-phosphate dehydrogenase A K217

AVG<sup>Succ</sup>KVLPELNGK

MS/MS Fragmentation of **AVGKVLPELNGK**

Found in **gi170081435**, glyceraldehyde-3-phosphate dehydrogenase A [Escherichia col.

Match to Query 7570: 1323.740394 from(662.877473,2+)

From data file xie021.dta

Click mouse within plot area to zoom in by factor of two about that point

Or,   to  Da

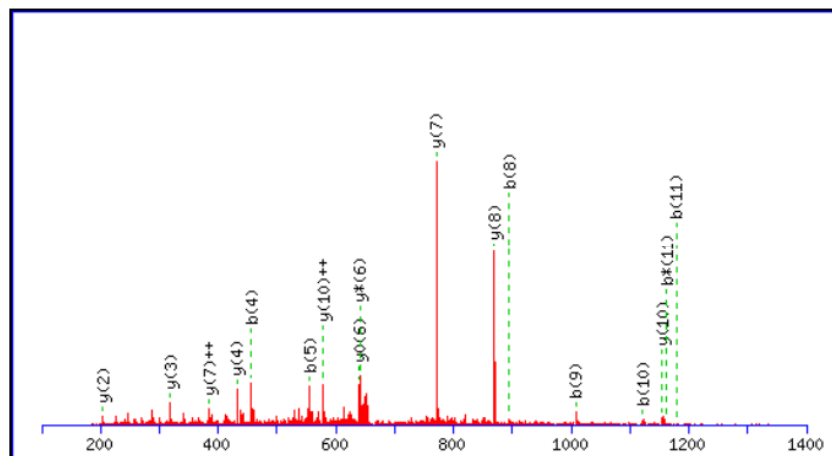

Monoisotopic mass of neutral peptide Mr(calc): 1323.74

Variable modifications:

K4 : Succinyl (K)

Ions Score: 37 Expect: 0.017

| #  | b              | b <sup>++</sup> | b*             | b <sup>*++</sup> | b <sup>0</sup> | b <sup>0++</sup> | Seq. | y              | y <sup>++</sup> | y*            | y <sup>*++</sup> | y <sup>0</sup> | y <sup>0++</sup> | #  |
|----|----------------|-----------------|----------------|------------------|----------------|------------------|------|----------------|-----------------|---------------|------------------|----------------|------------------|----|
| 1  | 72.04          | 36.53           |                |                  |                |                  | A    |                |                 |               |                  |                |                  | 12 |
| 2  | 171.11         | 86.06           |                |                  |                |                  | V    | 1253.71        | 627.36          | 1236.68       | 618.85           | 1235.70        | 618.35           | 11 |
| 3  | 228.13         | 114.57          |                |                  |                |                  | G    | <b>1154.64</b> | <b>577.82</b>   | 1137.61       | 569.31           | 1136.63        | 568.82           | 10 |
| 4  | <b>456.25</b>  | 228.63          | 439.22         | 220.11           |                |                  | K    | 1097.62        | 549.31          | 1080.59       | 540.80           | 1079.61        | 540.31           | 9  |
| 5  | <b>555.31</b>  | 278.16          | 538.29         | 269.65           |                |                  | V    | <b>869.51</b>  | 435.26          | 852.48        | 426.74           | 851.50         | 426.25           | 8  |
| 6  | 668.40         | 334.70          | 651.37         | 326.19           |                |                  | L    | <b>770.44</b>  | <b>385.72</b>   | 753.41        | 377.21           | 752.43         | 376.72           | 7  |
| 7  | 765.45         | 383.23          | 748.42         | 374.72           |                |                  | P    | 657.36         | 329.18          | <b>640.33</b> | 320.67           | <b>639.35</b>  | 320.18           | 6  |
| 8  | <b>894.49</b>  | 447.75          | 877.47         | 439.24           | 876.48         | 438.74           | E    | 560.30         | 280.66          | 543.28        | 272.14           | 542.29         | 271.65           | 5  |
| 9  | <b>1007.58</b> | 504.29          | 990.55         | 495.78           | 989.57         | 495.29           | L    | <b>431.26</b>  | 216.13          | 414.23        | 207.62           |                |                  | 4  |
| 10 | <b>1121.62</b> | 561.31          | 1104.59        | 552.80           | 1103.61        | 552.31           | N    | <b>318.18</b>  | 159.59          | 301.15        | 151.08           |                |                  | 3  |
| 11 | <b>1178.64</b> | 589.82          | <b>1161.61</b> | 581.31           | 1160.63        | 580.82           | G    | <b>204.13</b>  | 102.57          | 187.11        | 94.06            |                |                  | 2  |
| 12 |                |                 |                |                  |                |                  | K    | 147.11         | 74.06           | 130.09        | 65.55            |                |                  | 1  |

# glyceraldehyde-3-phosphate dehydrogenase A K225 VLPELNG<sup>Succ</sup>KLTGMAFR

MS/MS Fragmentation of **VLPELNGKLTGMAFR**

Found in **gi170081435**, glyceraldehyde-3-phosphate dehydrogenase A [Escherichia coli]

Match to Query 12905: 1744.913854 from(873.464203,2+)

From data file xie021.dta

Click mouse within plot area to zoom in by factor of two about that point

Or,   to  Da

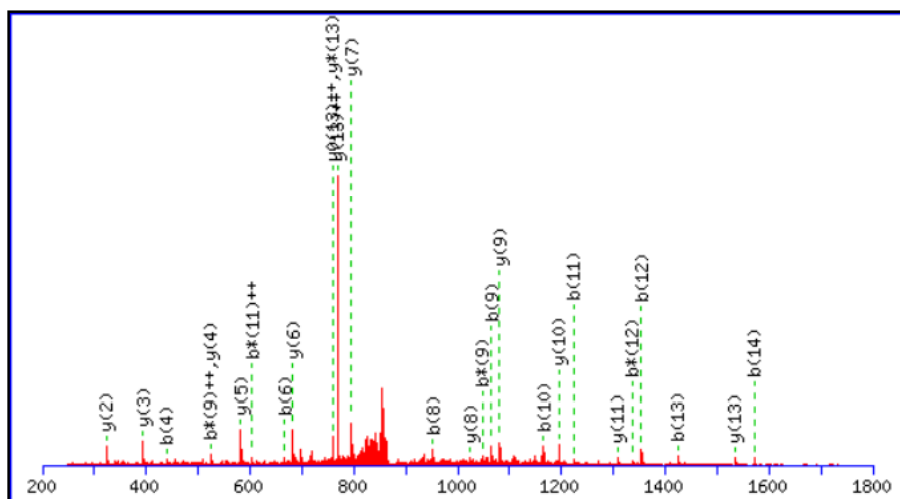

Monoisotopic mass of neutral peptide Mr(calc): 1744.92

Variable modifications:

K8 : Succinyl (K)

Ions Score: 46 Expect: 0.0029

| #  | b       | b <sup>++</sup> | b*      | b <sup>+++</sup> | b <sup>0</sup> | b <sup>0++</sup> | Seq. | y       | y <sup>++</sup> | y*      | y <sup>+++</sup> | y <sup>0</sup> | y <sup>0++</sup> | #  |
|----|---------|-----------------|---------|------------------|----------------|------------------|------|---------|-----------------|---------|------------------|----------------|------------------|----|
| 1  | 100.08  | 50.54           |         |                  |                |                  | V    |         |                 |         |                  |                |                  | 15 |
| 2  | 213.16  | 107.08          |         |                  |                |                  | L    | 1646.86 | 823.93          | 1629.83 | 815.42           | 1628.85        | 814.93           | 14 |
| 3  | 310.21  | 155.61          |         |                  |                |                  | P    | 1533.77 | 767.39          | 1516.75 | 758.88           | 1515.76        | 758.38           | 13 |
| 4  | 439.26  | 220.13          |         |                  | 421.24         | 211.13           | E    | 1436.72 | 718.86          | 1419.69 | 710.35           | 1418.71        | 709.86           | 12 |
| 5  | 552.34  | 276.67          |         |                  | 534.33         | 267.67           | L    | 1307.68 | 654.34          | 1290.65 | 645.83           | 1289.67        | 645.34           | 11 |
| 6  | 666.38  | 333.69          | 649.36  | 325.18           | 648.37         | 324.69           | N    | 1194.59 | 597.80          | 1177.57 | 589.29           | 1176.58        | 588.80           | 10 |
| 7  | 723.40  | 362.21          | 706.38  | 353.69           | 705.39         | 353.20           | G    | 1080.55 | 540.78          | 1063.52 | 532.27           | 1062.54        | 531.77           | 9  |
| 8  | 951.51  | 476.26          | 934.49  | 467.75           | 933.50         | 467.26           | K    | 1023.53 | 512.27          | 1006.50 | 503.75           | 1005.52        | 503.26           | 8  |
| 9  | 1064.60 | 532.80          | 1047.57 | 524.29           | 1046.59        | 523.80           | L    | 795.42  | 398.21          | 778.39  | 389.70           | 777.41         | 389.21           | 7  |
| 10 | 1165.65 | 583.33          | 1148.62 | 574.81           | 1147.64        | 574.32           | T    | 682.33  | 341.67          | 665.31  | 333.16           | 664.32         | 332.67           | 6  |
| 11 | 1222.67 | 611.84          | 1205.64 | 603.32           | 1204.66        | 602.83           | G    | 581.29  | 291.15          | 564.26  | 282.63           |                |                  | 5  |
| 12 | 1353.71 | 677.36          | 1336.68 | 668.84           | 1335.70        | 668.35           | M    | 524.26  | 262.64          | 507.24  | 254.12           |                |                  | 4  |
| 13 | 1424.75 | 712.88          | 1407.72 | 704.36           | 1406.73        | 703.87           | A    | 393.22  | 197.12          | 376.20  | 188.60           |                |                  | 3  |
| 14 | 1571.81 | 786.41          | 1554.79 | 777.90           | 1553.80        | 777.41           | F    | 322.19  | 161.60          | 305.16  | 153.08           |                |                  | 2  |
| 15 |         |                 |         |                  |                |                  | R    | 175.12  | 88.06           | 158.09  | 79.55            |                |                  | 1  |

# glyceraldehyde-3-phosphate dehydrogenase A K257

**AATYEQI<sup>Succ</sup>KAAVK**

MS/MS Fragmentation of **AATYEQIKA**AVK

Found in [gi|170081435](#), glyceraldehyde-3-phosphate dehydrogenase A [Escherichia coli

Match to Query 8300: 1391.730744 from(696.872648,2+)

From data file xie021.dta

Click mouse within plot area to zoom in by factor of two about that point

Or, Plot from  to  Da

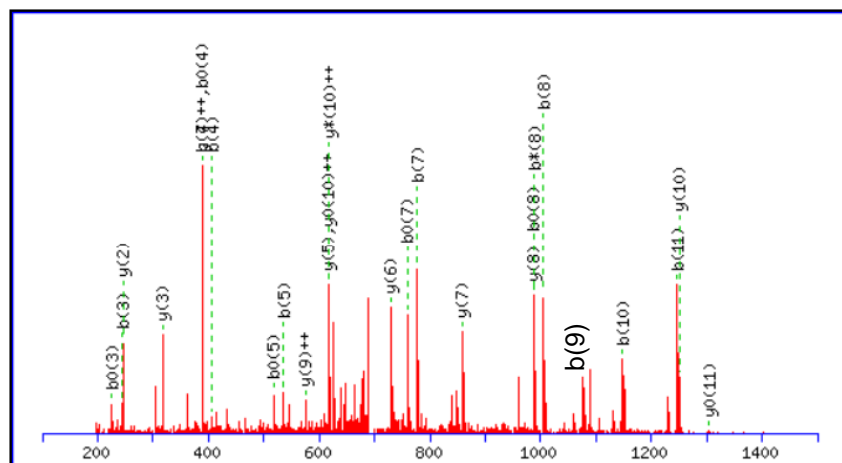

Monoisotopic mass of neutral peptide Mr(calc): 1391.73

Variable modifications:

K8 : Succinyl (K)

Ions Score: 60 Expect: 9.8e-005

| #  | b       | b <sup>++</sup> | b*      | b <sup>*++</sup> | b <sup>0</sup> | b <sup>0++</sup> | Seq. | y       | y <sup>++</sup> | y*      | y <sup>*++</sup> | y <sup>0</sup> | y <sup>0++</sup> | #  |
|----|---------|-----------------|---------|------------------|----------------|------------------|------|---------|-----------------|---------|------------------|----------------|------------------|----|
| 1  | 72.04   | 36.53           |         |                  |                |                  | A    |         |                 |         |                  |                |                  | 12 |
| 2  | 143.08  | 72.04           |         |                  |                |                  | A    | 1321.70 | 661.35          | 1304.67 | 652.84           | 1303.69        | 652.35           | 11 |
| 3  | 244.13  | 122.57          |         |                  | 226.12         | 113.56           | T    | 1250.66 | 625.83          | 1233.64 | 617.32           | 1232.65        | 616.83           | 10 |
| 4  | 407.19  | 204.10          |         |                  | 389.18         | 195.09           | Y    | 1149.62 | 575.31          | 1132.59 | 566.80           | 1131.60        | 566.31           | 9  |
| 5  | 536.24  | 268.62          |         |                  | 518.22         | 259.62           | E    | 986.55  | 493.78          | 969.53  | 485.27           | 968.54         | 484.77           | 8  |
| 6  | 664.29  | 332.65          | 647.27  | 324.14           | 646.28         | 323.65           | Q    | 857.51  | 429.26          | 840.48  | 420.74           |                |                  | 7  |
| 7  | 777.38  | 389.19          | 760.35  | 380.68           | 759.37         | 380.19           | I    | 729.45  | 365.23          | 712.42  | 356.72           |                |                  | 6  |
| 8  | 1005.49 | 503.25          | 988.46  | 494.73           | 987.48         | 494.24           | K    | 616.37  | 308.69          | 599.34  | 300.17           |                |                  | 5  |
| 9  | 1076.53 | 538.77          | 1059.50 | 530.25           | 1058.52        | 529.76           | A    | 388.26  | 194.63          | 371.23  | 186.12           |                |                  | 4  |
| 10 | 1147.56 | 574.29          | 1130.54 | 565.77           | 1129.55        | 565.28           | A    | 317.22  | 159.11          | 300.19  | 150.60           |                |                  | 3  |
| 11 | 1246.63 | 623.82          | 1229.60 | 615.31           | 1228.62        | 614.81           | V    | 246.18  | 123.59          | 229.15  | 115.08           |                |                  | 2  |
| 12 |         |                 |         |                  |                |                  | K    | 147.11  | 74.06           | 130.09  | 65.55            |                |                  | 1  |



# glyceraldehyde-3-phosphate dehydrogenase A K257

**AATYEQI<sup>Succ-D4</sup>KAAVK**

MS/MS Fragmentation of **AATYEQIKA**AVK

Found in **gi|170081435**, glyceraldehyde-3-phosphate dehydrogenase A [Escherichia coli

Match to Query 8352: 1395.755894 from(698.885223,2+)

From data file xie021.dta

Click mouse within plot area to zoom in by factor of two about that point

Or,   to  Da

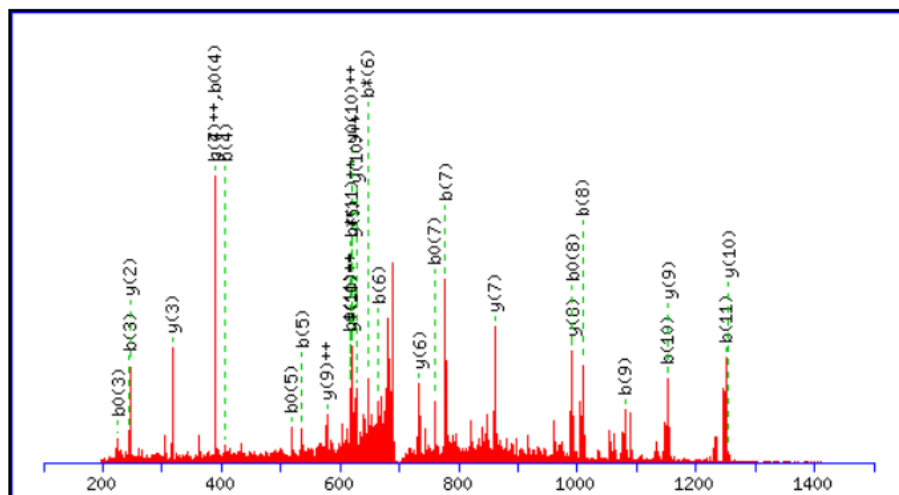

Monoisotopic mass of neutral peptide  $M_r(\text{calc})$ : 1395.75

Variable modifications:

K8 : Succinyl (K-D4)

Ions Score: 38 Expect: 0.014

| #  | b              | b <sup>++</sup> | b <sup>*</sup> | b <sup>*++</sup> | b <sup>0</sup> | b <sup>0++</sup> | Seq. | y              | y <sup>++</sup> | y <sup>*</sup> | y <sup>*++</sup> | y <sup>0</sup> | y <sup>0++</sup> | #  |
|----|----------------|-----------------|----------------|------------------|----------------|------------------|------|----------------|-----------------|----------------|------------------|----------------|------------------|----|
| 1  | 72.04          | 36.53           |                |                  |                |                  | A    |                |                 |                |                  |                |                  | 12 |
| 2  | 143.08         | 72.04           |                |                  |                |                  | A    | 1325.72        | 663.37          | 1308.70        | 654.85           | 1307.71        | 654.36           | 11 |
| 3  | <b>244.13</b>  | 122.57          |                |                  | <b>226.12</b>  | 113.56           | T    | <b>1254.69</b> | <b>627.85</b>   | 1237.66        | <b>619.33</b>    | 1236.68        | <b>618.84</b>    | 10 |
| 4  | <b>407.19</b>  | 204.10          |                |                  | <b>389.18</b>  | 195.09           | Y    | <b>1153.64</b> | <b>577.32</b>   | 1136.61        | 568.81           | 1135.63        | 568.32           | 9  |
| 5  | <b>536.24</b>  | 268.62          |                |                  | <b>518.22</b>  | 259.62           | E    | <b>990.58</b>  | 495.79          | 973.55         | 487.28           | 972.57         | 486.79           | 8  |
| 6  | <b>664.29</b>  | 332.65          | <b>647.27</b>  | 324.14           | 646.28         | 323.65           | Q    | <b>861.53</b>  | 431.27          | 844.51         | 422.76           |                |                  | 7  |
| 7  | <b>777.38</b>  | <b>389.19</b>   | 760.35         | 380.68           | <b>759.37</b>  | 380.19           | I    | <b>733.48</b>  | 367.24          | 716.45         | 358.73           |                |                  | 6  |
| 8  | <b>1009.51</b> | 505.26          | 992.49         | 496.75           | <b>991.50</b>  | 496.26           | K    | <b>620.39</b>  | 310.70          | 603.36         | 302.19           |                |                  | 5  |
| 9  | <b>1080.55</b> | 540.78          | 1063.52        | 532.27           | 1062.54        | 531.77           | A    | <b>388.26</b>  | 194.63          | 371.23         | 186.12           |                |                  | 4  |
| 10 | <b>1151.59</b> | 576.30          | 1134.56        | 567.78           | 1133.58        | 567.29           | A    | <b>317.22</b>  | 159.11          | 300.19         | 150.60           |                |                  | 3  |
| 11 | <b>1250.66</b> | 625.83          | 1233.63        | <b>617.32</b>    | 1232.65        | <b>616.83</b>    | V    | <b>246.18</b>  | 123.59          | 229.15         | 115.08           |                |                  | 2  |
| 12 |                |                 |                |                  |                |                  | K    | 147.11         | 74.06           | 130.09         | 65.55            |                |                  | 1  |

# glyceraldehyde-3-phosphate dehydrogenase A K261

AAV<sup>Succ</sup>KAAAE<sup>GEMK</sup>

MS/MS Fragmentation of **AAVKAAAE<sup>GEMK</sup>**

Found in **gij170081435**, glyceraldehyde-3-phosphate dehydrogenase A [Escherichia coli]

Match to Query 6816: 1274.617104 from(638.315828,2+)

From data file xie021.dta

Click mouse within plot area to zoom in by factor of two about that point

Or,   to  Da

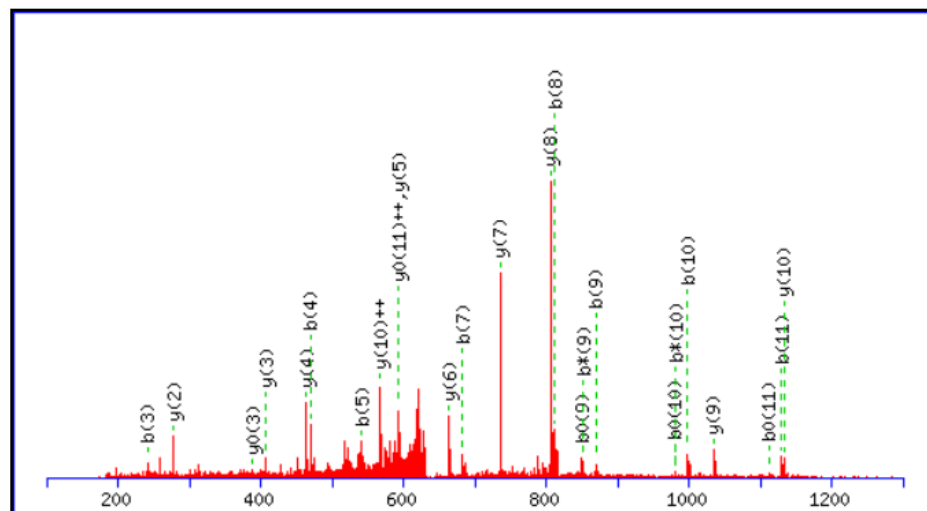

Monoisotopic mass of neutral peptide  $M_r(\text{calc})$ : 1274.62

Variable modifications:

K4 : Succinyl (K)

Ions Score: 48 Expect: 0.0014

| #  | b       | b <sup>++</sup> | b <sup>*</sup> | b <sup>*++</sup> | b <sup>0</sup> | b <sup>0++</sup> | Seq. | y       | y <sup>++</sup> | y <sup>*</sup> | y <sup>*++</sup> | y <sup>0</sup> | y <sup>0++</sup> | #  |
|----|---------|-----------------|----------------|------------------|----------------|------------------|------|---------|-----------------|----------------|------------------|----------------|------------------|----|
| 1  | 72.04   | 36.53           |                |                  |                |                  | A    |         |                 |                |                  |                |                  | 12 |
| 2  | 143.08  | 72.04           |                |                  |                |                  | A    | 1204.59 | 602.80          | 1187.56        | 594.28           | 1186.58        | 593.79           | 11 |
| 3  | 242.15  | 121.58          |                |                  |                |                  | V    | 1133.55 | 567.28          | 1116.52        | 558.77           | 1115.54        | 558.27           | 10 |
| 4  | 470.26  | 235.63          | 453.23         | 227.12           |                |                  | K    | 1034.48 | 517.74          | 1017.46        | 509.23           | 1016.47        | 508.74           | 9  |
| 5  | 541.30  | 271.15          | 524.27         | 262.64           |                |                  | A    | 806.37  | 403.69          | 789.34         | 395.18           | 788.36         | 394.68           | 8  |
| 6  | 612.34  | 306.67          | 595.31         | 298.16           |                |                  | A    | 735.33  | 368.17          | 718.31         | 359.66           | 717.32         | 359.17           | 7  |
| 7  | 683.37  | 342.19          | 666.35         | 333.68           |                |                  | A    | 664.30  | 332.65          | 647.27         | 324.14           | 646.29         | 323.65           | 6  |
| 8  | 812.41  | 406.71          | 795.39         | 398.20           | 794.40         | 397.71           | E    | 593.26  | 297.13          | 576.23         | 288.62           | 575.25         | 288.13           | 5  |
| 9  | 869.44  | 435.22          | 852.41         | 426.71           | 851.43         | 426.22           | G    | 464.22  | 232.61          | 447.19         | 224.10           | 446.21         | 223.61           | 4  |
| 10 | 998.48  | 499.74          | 981.45         | 491.23           | 980.47         | 490.74           | E    | 407.20  | 204.10          | 390.17         | 195.59           | 389.19         | 195.10           | 3  |
| 11 | 1129.52 | 565.26          | 1112.49        | 556.75           | 1111.51        | 556.26           | M    | 278.15  | 139.58          | 261.13         | 131.07           |                |                  | 2  |
| 12 |         |                 |                |                  |                |                  | K    | 147.11  | 74.06           | 130.09         | 65.55            |                |                  | 1  |

# glyceraldehyde-3-phosphate dehydrogenase A K261

AAV<sup>Succ-D4</sup>KAAAEGEMK

MS/MS Fragmentation of **AAVKAAAEGEMK**

Found in **gi170081435**, glyceraldehyde-3-phosphate dehydrogenase A [Escherichia cc

Match to Query 6878: 1278.642494 from(640.328523,2+)

From data file xie021.dta

Click mouse within plot area to zoom in by factor of two about that point

Or,   to  Da

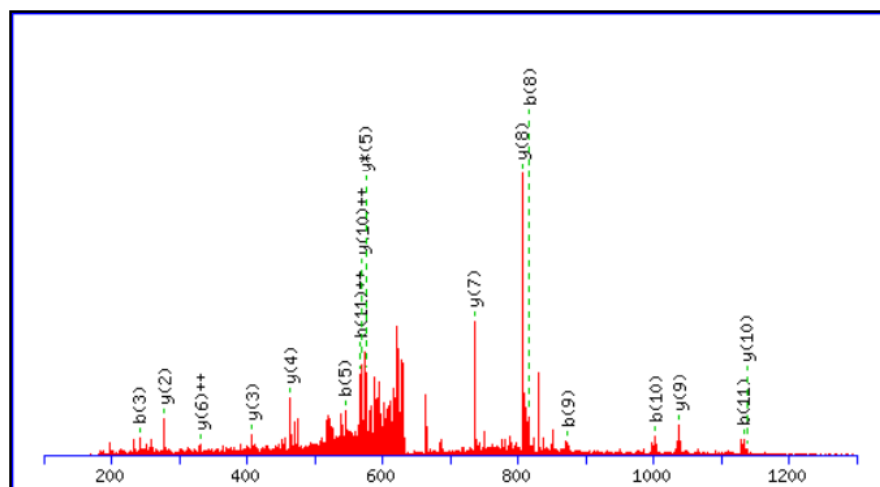

Monoisotopic mass of neutral peptide Mr(calc): 1278.64

Variable modifications:

K4 : Succinyl (K-D4)

Ions Score: 31 Expect: 0.072

| #  | b              | b <sup>++</sup> | b*      | b <sup>*++</sup> | b <sup>0</sup> | b <sup>0++</sup> | Seq. | y              | y <sup>++</sup> | y*            | y <sup>*++</sup> | y <sup>0</sup> | y <sup>0++</sup> | #  |
|----|----------------|-----------------|---------|------------------|----------------|------------------|------|----------------|-----------------|---------------|------------------|----------------|------------------|----|
| 1  | 72.04          | 36.53           |         |                  |                |                  | A    |                |                 |               |                  |                |                  | 12 |
| 2  | 143.08         | 72.04           |         |                  |                |                  | A    | 1208.61        | 604.81          | 1191.59       | 596.30           | 1190.60        | 595.80           | 11 |
| 3  | <b>242.15</b>  | 121.58          |         |                  |                |                  | V    | <b>1137.58</b> | <b>569.29</b>   | 1120.55       | 560.78           | 1119.57        | 560.29           | 10 |
| 4  | 474.29         | 237.65          | 457.26  | 229.13           |                |                  | K    | <b>1038.51</b> | 519.76          | 1021.48       | 511.24           | 1020.50        | 510.75           | 9  |
| 5  | <b>545.32</b>  | 273.17          | 528.30  | 264.65           |                |                  | A    | <b>806.37</b>  | 403.69          | 789.34        | 395.18           | 788.36         | 394.68           | 8  |
| 6  | 616.36         | 308.68          | 599.33  | 300.17           |                |                  | A    | <b>735.33</b>  | 368.17          | 718.31        | 359.66           | 717.32         | 359.17           | 7  |
| 7  | 687.40         | 344.20          | 670.37  | 335.69           |                |                  | A    | 664.30         | <b>332.65</b>   | 647.27        | 324.14           | 646.29         | 323.65           | 6  |
| 8  | <b>816.44</b>  | 408.72          | 799.41  | 400.21           | 798.43         | 399.72           | E    | 593.26         | 297.13          | <b>576.23</b> | 288.62           | 575.25         | 288.13           | 5  |
| 9  | <b>873.46</b>  | 437.23          | 856.43  | 428.72           | 855.45         | 428.23           | G    | <b>464.22</b>  | 232.61          | 447.19        | 224.10           | 446.21         | 223.61           | 4  |
| 10 | <b>1002.50</b> | 501.76          | 985.48  | 493.24           | 984.49         | 492.75           | E    | <b>407.20</b>  | 204.10          | 390.17        | 195.59           | 389.19         | 195.10           | 3  |
| 11 | <b>1133.54</b> | <b>567.28</b>   | 1116.52 | 558.76           | 1115.53        | 558.27           | M    | <b>278.15</b>  | 139.58          | 261.13        | 131.07           |                |                  | 2  |
| 12 |                |                 |         |                  |                |                  | K    | 147.11         | 74.06           | 130.09        | 65.55            |                |                  | 1  |

# glyceraldehyde-3-phosphate dehydrogenase A K331

VLDLIAHIS<sup>SuccK</sup>

MS/MS Fragmentation of **VLDLIAHISK**

Found in [gi|170081435](#), glyceraldehyde-3-phosphate dehydrogenase A [Escherichia coli]

Match to Query 5564: 1207.683264 from(604.848908,2+)

From data file xie021.dta

Click mouse within plot area to zoom in by factor of two about that point

Or,   to  Da

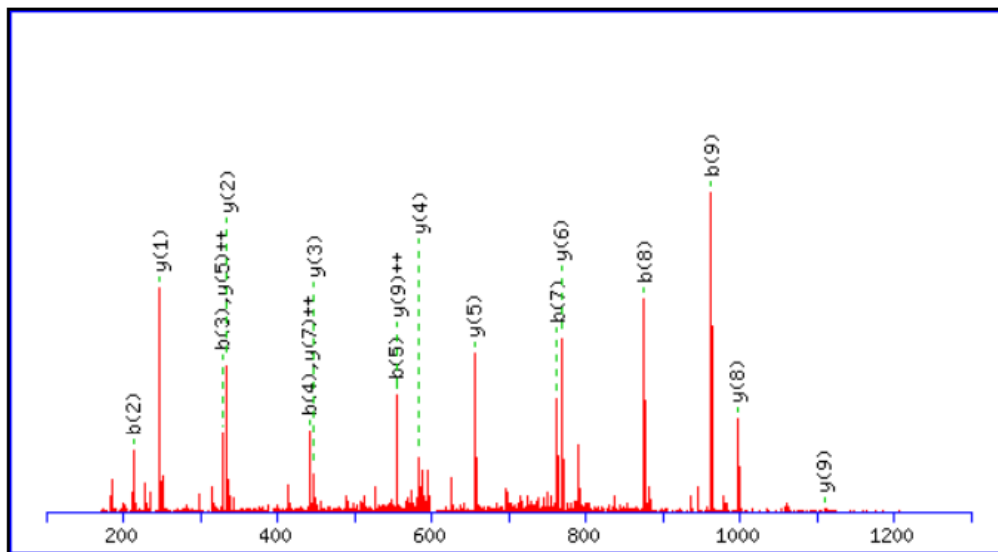

Monoisotopic mass of neutral peptide  $M_r(\text{calc})$ : 1207.68

Variable modifications:

K10 : Succinyl (K)

Ions Score: 53 Expect: 0.00047

| #  | b             | b <sup>++</sup> | b <sup>0</sup> | b <sup>0++</sup> | Seq. | y              | y <sup>++</sup> | y*      | y <sup>*++</sup> | y <sup>0</sup> | y <sup>0++</sup> | #  |
|----|---------------|-----------------|----------------|------------------|------|----------------|-----------------|---------|------------------|----------------|------------------|----|
| 1  | 100.08        | 50.54           |                |                  | V    |                |                 |         |                  |                |                  | 10 |
| 2  | <b>213.16</b> | 107.08          |                |                  | L    | <b>1109.62</b> | <b>555.31</b>   | 1092.59 | 546.80           | 1091.61        | 546.31           | 9  |
| 3  | <b>328.19</b> | 164.60          | 310.18         | 155.59           | D    | <b>996.54</b>  | 498.77          | 979.51  | 490.26           | 978.53         | 489.77           | 8  |
| 4  | <b>441.27</b> | 221.14          | 423.26         | 212.13           | L    | 881.51         | <b>441.26</b>   | 864.48  | 432.74           | 863.50         | 432.25           | 7  |
| 5  | <b>554.35</b> | 277.68          | 536.34         | 268.68           | I    | <b>768.43</b>  | 384.72          | 751.40  | 376.20           | 750.41         | 375.71           | 6  |
| 6  | 625.39        | 313.20          | 607.38         | 304.19           | A    | <b>655.34</b>  | <b>328.17</b>   | 638.31  | 319.66           | 637.33         | 319.17           | 5  |
| 7  | <b>762.45</b> | 381.73          | 744.44         | 372.72           | H    | <b>584.30</b>  | 292.66          | 567.28  | 284.14           | 566.29         | 283.65           | 4  |
| 8  | <b>875.53</b> | 438.27          | 857.52         | 429.27           | I    | <b>447.24</b>  | 224.13          | 430.22  | 215.61           | 429.23         | 215.12           | 3  |
| 9  | <b>962.57</b> | 481.79          | 944.56         | 472.78           | S    | <b>334.16</b>  | 167.58          | 317.13  | 159.07           | 316.15         | 158.58           | 2  |
| 10 |               |                 |                |                  | K    | <b>247.13</b>  | 124.07          | 230.10  | 115.55           |                |                  | 1  |

## **Supplementary Data 2 :**

**MS/MS spectra of succinyllysine peptides indentified by affinity purification using anti-succinyllysine pan antibody and mass spectrometry**

# Isocitrate dehydrogenase K100

## VAI<sup>Succ</sup>KGPLTTPVGGIR

MS/MS Fragmentation of **VAIKGPLTTPVGGIR**

Found in **gi170080787**, isocitrate dehydrogenase, specific for NADP+ [Escherichia col

Match to Query 11470: 1634.936194 from(818.475373,2+)

From data file xie021.dta

Click mouse within plot area to zoom in by factor of two about that point

Or,   to  Da

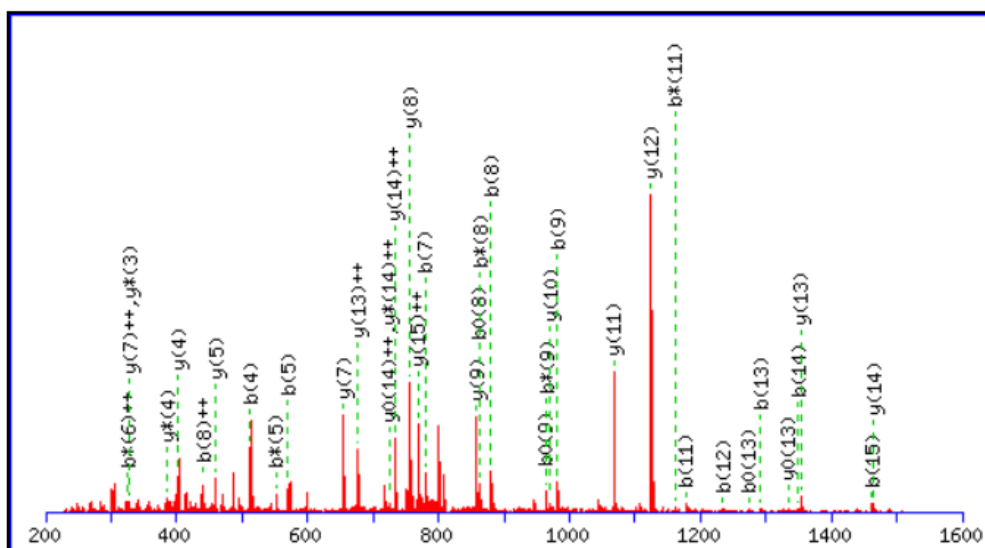

Monoisotopic mass of neutral peptide Mr(calc): 1634.94

Variable modifications:

K4 : Succinyl (K)

Ions Score: 36 Expect: 0.073

| #  | b       | b <sup>++</sup> | b*      | b <sup>*++</sup> | b <sup>0</sup> | b <sup>0++</sup> | Seq. | y       | y <sup>++</sup> | y*      | y <sup>*++</sup> | y <sup>0</sup> | y <sup>0++</sup> | #  |
|----|---------|-----------------|---------|------------------|----------------|------------------|------|---------|-----------------|---------|------------------|----------------|------------------|----|
| 1  | 100.08  | 50.54           |         |                  |                |                  | V    |         |                 |         |                  |                |                  | 16 |
| 2  | 171.11  | 86.06           |         |                  |                |                  | A    | 1536.87 | 768.94          | 1519.85 | 760.43           | 1518.86        | 759.94           | 15 |
| 3  | 284.20  | 142.60          |         |                  |                |                  | I    | 1465.84 | 733.42          | 1448.81 | 724.91           | 1447.83        | 724.42           | 14 |
| 4  | 512.31  | 256.66          | 495.28  | 248.14           |                |                  | K    | 1352.75 | 676.88          | 1335.73 | 668.37           | 1334.74        | 667.87           | 13 |
| 5  | 569.33  | 285.17          | 552.30  | 276.66           |                |                  | G    | 1124.64 | 562.82          | 1107.62 | 554.31           | 1106.63        | 553.82           | 12 |
| 6  | 666.38  | 333.69          | 649.36  | 325.18           |                |                  | P    | 1067.62 | 534.31          | 1050.59 | 525.80           | 1049.61        | 525.31           | 11 |
| 7  | 779.47  | 390.24          | 762.44  | 381.72           |                |                  | L    | 970.57  | 485.79          | 953.54  | 477.27           | 952.56         | 476.78           | 10 |
| 8  | 880.51  | 440.76          | 863.49  | 432.25           | 862.50         | 431.76           | T    | 857.48  | 429.25          | 840.46  | 420.73           | 839.47         | 420.24           | 9  |
| 9  | 981.56  | 491.28          | 964.53  | 482.77           | 963.55         | 482.28           | T    | 756.44  | 378.72          | 739.41  | 370.21           | 738.43         | 369.72           | 8  |
| 10 | 1078.61 | 539.81          | 1061.59 | 531.30           | 1060.60        | 530.81           | P    | 655.39  | 328.20          | 638.36  | 319.68           |                |                  | 7  |
| 11 | 1177.68 | 589.34          | 1160.66 | 580.83           | 1159.67        | 580.34           | V    | 558.34  | 279.67          | 541.31  | 271.16           |                |                  | 6  |
| 12 | 1234.70 | 617.86          | 1217.68 | 609.34           | 1216.69        | 608.85           | G    | 459.27  | 230.14          | 442.24  | 221.62           |                |                  | 5  |
| 13 | 1291.73 | 646.37          | 1274.70 | 637.85           | 1273.72        | 637.36           | G    | 402.25  | 201.63          | 385.22  | 193.11           |                |                  | 4  |
| 14 | 1348.75 | 674.88          | 1331.72 | 666.36           | 1330.74        | 665.87           | G    | 345.22  | 173.12          | 328.20  | 164.60           |                |                  | 3  |
| 15 | 1461.83 | 731.42          | 1444.80 | 722.91           | 1443.82        | 722.41           | I    | 288.20  | 144.61          | 271.18  | 136.09           |                |                  | 2  |
| 16 |         |                 |         |                  |                |                  | R    | 175.12  | 88.06           | 158.09  | 79.55            |                |                  | 1  |

# Isocitrate dehydrogenase K242

## FTEGAF<sup>Succ</sup>KDWGYQLAR

MS/MS Fragmentation of **FTEGAFKDWGYQLAR**

Found in [gi91267267](#), isocitrate dehydrogenase [Escherichia coli]

Match to Query 19864: 1888.933274 from(945.473913,2+)

From data file zzh014.dta

Click mouse within plot area to zoom in by factor of two about that point

Or,   to  Da

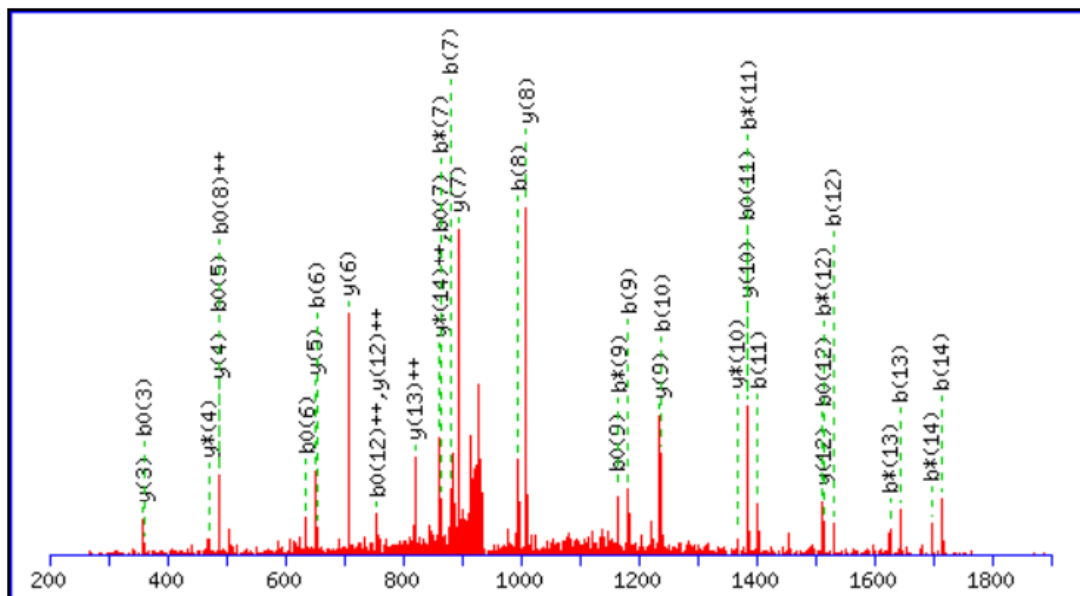

K7<sup>+</sup> : Succinyl (K)

Ions Score: 54 Expect: 0.017

Matches (Bold Red): 38/140 fragment ions using 69 most intense peaks

| #  | b              | b <sup>++</sup> | b <sup>*</sup> | b <sup>*++</sup> | b <sup>0</sup> | b <sup>0++</sup> | Seq. | y              | y <sup>++</sup> | y <sup>*</sup> | y <sup>*++</sup> | y <sup>0</sup> | y <sup>0++</sup> | #  |
|----|----------------|-----------------|----------------|------------------|----------------|------------------|------|----------------|-----------------|----------------|------------------|----------------|------------------|----|
| 1  | 148.08         | 74.54           |                |                  |                |                  | F    |                |                 |                |                  |                |                  | 15 |
| 2  | 249.12         | 125.07          |                |                  | 231.11         | 116.06           | T    | 1741.82        | 871.41          | 1724.79        | <b>862.90</b>    | 1723.81        | 862.41           | 14 |
| 3  | 378.17         | 189.59          |                |                  | <b>360.16</b>  | 180.58           | E    | 1640.77        | <b>820.89</b>   | 1623.74        | 812.38           | 1622.76        | 811.88           | 13 |
| 4  | 435.19         | 218.10          |                |                  | 417.18         | 209.09           | G    | <b>1511.73</b> | <b>756.37</b>   | 1494.70        | 747.85           | 1493.72        | 747.36           | 12 |
| 5  | 506.22         | 253.62          |                |                  | <b>488.21</b>  | 244.61           | A    | 1454.71        | 727.86          | 1437.68        | 719.34           | 1436.70        | 718.85           | 11 |
| 6  | <b>653.29</b>  | 327.15          |                |                  | <b>635.28</b>  | 318.14           | F    | <b>1383.67</b> | 692.34          | <b>1366.64</b> | 683.82           | 1365.66        | 683.33           | 10 |
| 7  | <b>881.40</b>  | 441.21          | <b>864.38</b>  | 432.69           | <b>863.39</b>  | 432.20           | K    | <b>1236.60</b> | 618.80          | 1219.57        | 610.29           | 1218.59        | 609.80           | 9  |
| 8  | <b>996.43</b>  | 498.72          | 979.40         | 490.21           | 978.42         | <b>489.71</b>    | D    | <b>1008.49</b> | 504.75          | 991.46         | 496.24           | 990.48         | 495.74           | 8  |
| 9  | <b>1182.51</b> | 591.76          | <b>1165.48</b> | 583.25           | <b>1164.50</b> | 582.75           | W    | <b>893.46</b>  | 447.24          | 876.44         | 438.72           |                |                  | 7  |
| 10 | <b>1239.53</b> | 620.27          | 1222.51        | 611.76           | 1221.52        | 611.26           | G    | <b>707.38</b>  | 354.20          | 690.36         | 345.68           |                |                  | 6  |
| 11 | <b>1402.59</b> | 701.80          | <b>1385.57</b> | 693.29           | <b>1384.58</b> | 692.80           | Y    | <b>650.36</b>  | 325.68          | 633.34         | 317.17           |                |                  | 5  |
| 12 | <b>1530.65</b> | 765.83          | <b>1513.63</b> | 757.32           | <b>1512.64</b> | <b>756.83</b>    | Q    | <b>487.30</b>  | 244.15          | <b>470.27</b>  | 235.64           |                |                  | 4  |
| 13 | <b>1643.74</b> | 822.37          | <b>1626.71</b> | 813.86           | 1625.73        | 813.37           | L    | <b>359.24</b>  | 180.12          | 342.21         | 171.61           |                |                  | 3  |
| 14 | <b>1714.77</b> | 857.89          | <b>1697.75</b> | 849.38           | 1696.76        | 848.89           | A    | 246.16         | 123.58          | 229.13         | 115.07           |                |                  | 2  |
| 15 |                |                 |                |                  |                |                  | R    | 175.12         | 88.06           | 158.09         | 79.55            |                |                  | 1  |

# serine hydroxymethyltransferase K62

## YAEGYPG<sup>Succ</sup>KR

MS/MS Fragmentation of **YAEGYPGKR**

Found in [gi|170082161](#), serine hydroxymethyltransferase [Escherichia coli str. K-12 sul

Match to Query 3582: 1139.529694 from(570.772123,2+)

From data file zzh61.dta

Click mouse within plot area to zoom in by factor of two about that point

Or,   to  Da

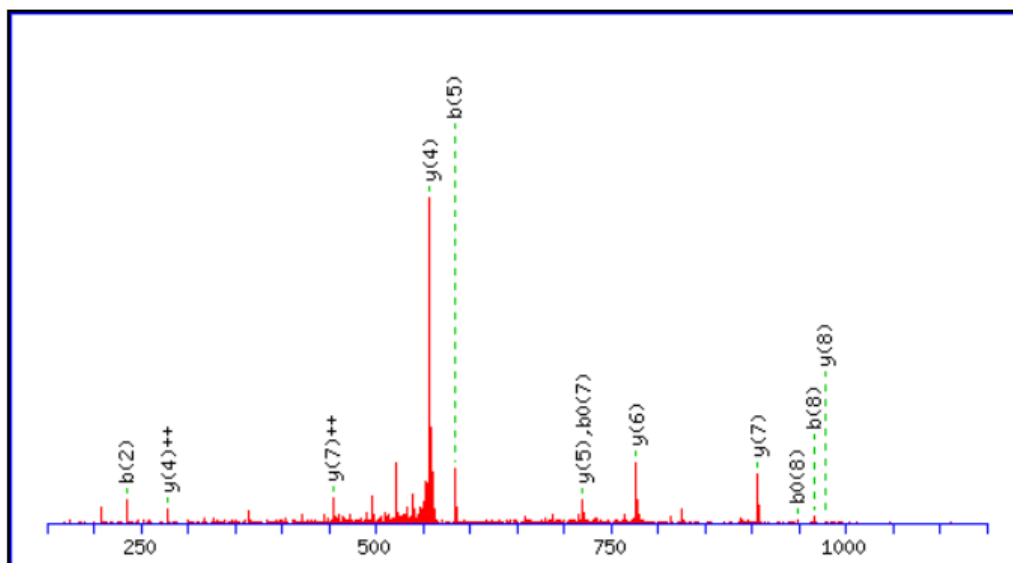

Monoisotopic mass of neutral peptide Mr(calc): 1139.52

Variable modifications:

K8 : Succinyl (K)

Ions Score: 43 Expect: 0.0022

| # | b             | b <sup>++</sup> | b*     | b <sup>*++</sup> | b <sup>0</sup> | b <sup>0++</sup> | Seq. | y             | y <sup>++</sup> | y*     | y <sup>*++</sup> | y <sup>0</sup> | y <sup>0++</sup> | # |
|---|---------------|-----------------|--------|------------------|----------------|------------------|------|---------------|-----------------|--------|------------------|----------------|------------------|---|
| 1 | 164.07        | 82.54           |        |                  |                |                  | Y    |               |                 |        |                  |                |                  | 9 |
| 2 | <b>235.11</b> | 118.06          |        |                  |                |                  | A    | <b>977.47</b> | 489.24          | 960.44 | 480.72           | 959.46         | 480.23           | 8 |
| 3 | 364.15        | 182.58          |        |                  | 346.14         | 173.57           | E    | <b>906.43</b> | <b>453.72</b>   | 889.41 | 445.21           | 888.42         | 444.71           | 7 |
| 4 | 421.17        | 211.09          |        |                  | 403.16         | 202.08           | G    | <b>777.39</b> | 389.20          | 760.36 | 380.68           |                |                  | 6 |
| 5 | <b>584.24</b> | 292.62          |        |                  | 566.22         | 283.62           | Y    | <b>720.37</b> | 360.69          | 703.34 | 352.17           |                |                  | 5 |
| 6 | 681.29        | 341.15          |        |                  | 663.28         | 332.14           | P    | <b>557.30</b> | <b>279.16</b>   | 540.28 | 270.64           |                |                  | 4 |
| 7 | 738.31        | 369.66          |        |                  | <b>720.30</b>  | 360.65           | G    | 460.25        | 230.63          | 443.22 | 222.12           |                |                  | 3 |
| 8 | <b>966.42</b> | 483.71          | 949.39 | 475.20           | <b>948.41</b>  | 474.71           | K    | 403.23        | 202.12          | 386.20 | 193.61           |                |                  | 2 |
| 9 |               |                 |        |                  |                |                  | R    | 175.12        | 88.06           | 158.09 | 79.55            |                |                  | 1 |



# serine hydroxymethyltransferase K242

## GGLILA<sup>Succ</sup>KGGSEELYK

MS/MS Fragmentation of **GGLILAKGGSEELYK**

Found in [gi|170082161](#), serine hydroxymethyltransferase [Escherichia coli str. K-12 su

Match to Query 11452: 1633.855504 from(817.935028,2+)

From data file xie021.dta

Click mouse within plot area to zoom in by factor of two about that point

Or,   to  Da

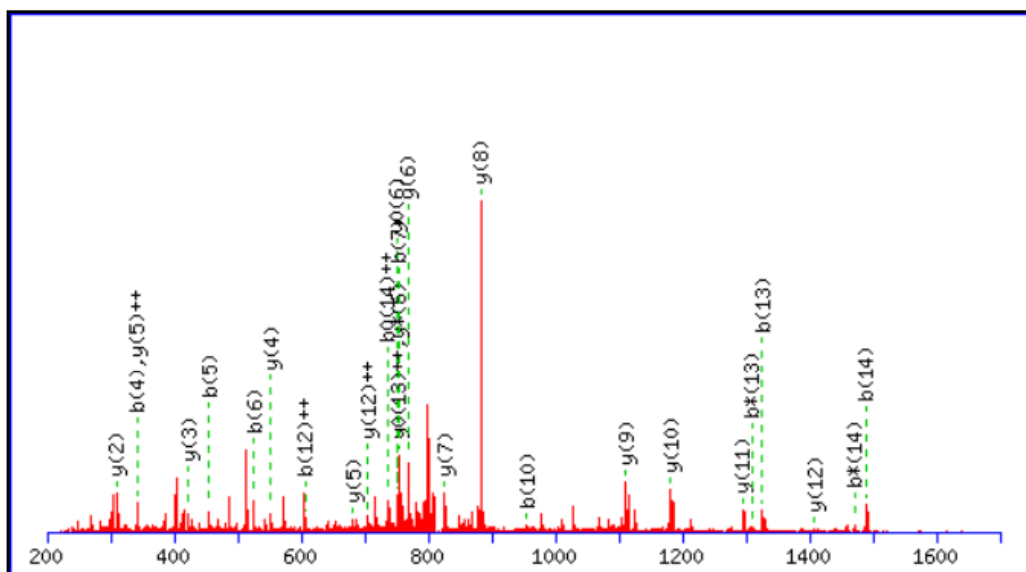

Monoisotopic mass of neutral peptide  $M_r(\text{calc})$ : 1633.86

Variable modifications:

K7 : Succinyl (K)

Ions Score: 38 Expect: 0.019

| #  | b       | b <sup>++</sup> | b*      | b <sup>*++</sup> | b <sup>0</sup> | b <sup>0++</sup> | Seq. | y       | y <sup>++</sup> | y*      | y <sup>*++</sup> | y <sup>0</sup> | y <sup>0++</sup> | #  |
|----|---------|-----------------|---------|------------------|----------------|------------------|------|---------|-----------------|---------|------------------|----------------|------------------|----|
| 1  | 58.03   | 29.52           |         |                  |                |                  | G    |         |                 |         |                  |                |                  | 15 |
| 2  | 115.05  | 58.03           |         |                  |                |                  | G    | 1577.84 | 789.42          | 1560.82 | 780.91           | 1559.83        | 780.42           | 14 |
| 3  | 228.13  | 114.57          |         |                  |                |                  | L    | 1520.82 | 760.91          | 1503.79 | 752.40           | 1502.81        | 751.91           | 13 |
| 4  | 341.22  | 171.11          |         |                  |                |                  | I    | 1407.74 | 704.37          | 1390.71 | 695.86           | 1389.73        | 695.37           | 12 |
| 5  | 454.30  | 227.65          |         |                  |                |                  | L    | 1294.65 | 647.83          | 1277.63 | 639.32           | 1276.64        | 638.82           | 11 |
| 6  | 525.34  | 263.17          |         |                  |                |                  | A    | 1181.57 | 591.29          | 1164.54 | 582.77           | 1163.56        | 582.28           | 10 |
| 7  | 753.45  | 377.23          | 736.42  | 368.72           |                |                  | K    | 1110.53 | 555.77          | 1093.50 | 547.26           | 1092.52        | 546.76           | 9  |
| 8  | 810.47  | 405.74          | 793.45  | 397.23           |                |                  | G    | 882.42  | 441.71          | 865.39  | 433.20           | 864.41         | 432.71           | 8  |
| 9  | 867.49  | 434.25          | 850.47  | 425.74           |                |                  | G    | 825.40  | 413.20          | 808.37  | 404.69           | 807.39         | 404.20           | 7  |
| 10 | 954.53  | 477.77          | 937.50  | 469.25           | 936.51         | 468.76           | S    | 768.38  | 384.69          | 751.35  | 376.18           | 750.37         | 375.69           | 6  |
| 11 | 1083.57 | 542.29          | 1066.54 | 533.77           | 1065.56        | 533.28           | E    | 681.35  | 341.18          | 664.32  | 332.66           | 663.33         | 332.17           | 5  |
| 12 | 1212.61 | 606.81          | 1195.58 | 598.30           | 1194.60        | 597.80           | E    | 552.30  | 276.66          | 535.28  | 268.14           | 534.29         | 267.65           | 4  |
| 13 | 1325.69 | 663.35          | 1308.67 | 654.84           | 1307.68        | 654.35           | L    | 423.26  | 212.13          | 406.23  | 203.62           |                |                  | 3  |
| 14 | 1488.76 | 744.88          | 1471.73 | 736.37           | 1470.75        | 735.88           | Y    | 310.18  | 155.59          | 293.15  | 147.08           |                |                  | 2  |
| 15 |         |                 |         |                  |                |                  | K    | 147.11  | 74.06           | 130.09  | 65.55            |                |                  | 1  |

# serine hydroxymethyltransferase K250

## GGSEELY<sup>Succ</sup>KK

MS/MS Fragmentation of **GGSEELYKK**

Found in **gi170082161**, serine hydroxymethyltransferase [Escherichia coli str. K-12 su

Match to Query 3359: 1109.529084 from(555.771818,2+)

From data file zzh61.dta

Click mouse within plot area to zoom in by factor of two about that point

Or,   to  Da

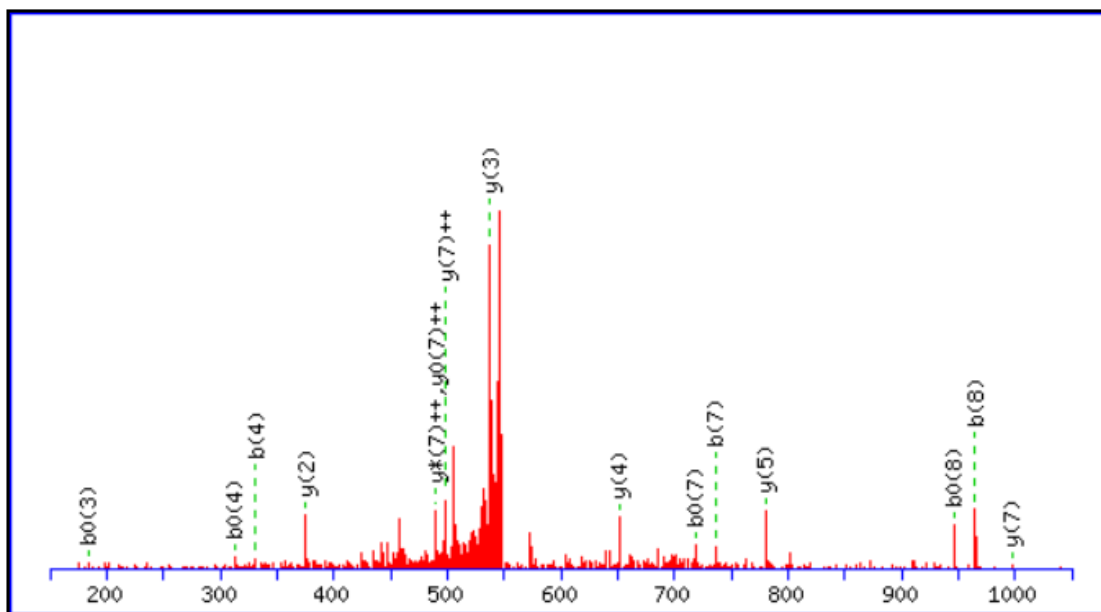

Monoisotopic mass of neutral peptide  $M_r(\text{calc})$ : 1109.52

Variable modifications:

K8 : Succinyl (K)

Ions Score: 34 Expect: 0.016

Matches (**Bold Red**): 15/70 fragment ions using 29 most intense peaks

| # | b             | b <sup>++</sup> | b*     | b <sup>*++</sup> | b <sup>0</sup> | b <sup>0++</sup> | Seq.     | y             | y <sup>++</sup> | y*      | y <sup>*++</sup> | y <sup>0</sup> | y <sup>0++</sup> | # |
|---|---------------|-----------------|--------|------------------|----------------|------------------|----------|---------------|-----------------|---------|------------------|----------------|------------------|---|
| 1 | 58.03         | 29.52           |        |                  |                |                  | <b>G</b> |               |                 |         |                  |                |                  | 9 |
| 2 | 115.05        | 58.03           |        |                  |                |                  | <b>G</b> | 1053.51       | 527.26          | 1036.48 | 518.75           | 1035.50        | 518.25           | 8 |
| 3 | 202.08        | 101.54          |        |                  | <b>184.07</b>  | 92.54            | <b>S</b> | <b>996.49</b> | <b>498.75</b>   | 979.46  | <b>490.23</b>    | 978.48         | <b>489.74</b>    | 7 |
| 4 | <b>331.12</b> | 166.07          |        |                  | <b>313.11</b>  | 157.06           | <b>E</b> | 909.46        | 455.23          | 892.43  | 446.72           | 891.45         | 446.23           | 6 |
| 5 | 460.17        | 230.59          |        |                  | 442.16         | 221.58           | <b>E</b> | <b>780.41</b> | 390.71          | 763.39  | 382.20           | 762.40         | 381.71           | 5 |
| 6 | 573.25        | 287.13          |        |                  | 555.24         | 278.12           | <b>L</b> | <b>651.37</b> | 326.19          | 634.34  | 317.68           |                |                  | 4 |
| 7 | <b>736.31</b> | 368.66          |        |                  | <b>718.30</b>  | 359.66           | <b>Y</b> | <b>538.29</b> | 269.65          | 521.26  | 261.13           |                |                  | 3 |
| 8 | <b>964.43</b> | 482.72          | 947.40 | 474.20           | <b>946.42</b>  | 473.71           | <b>K</b> | <b>375.22</b> | 188.12          | 358.20  | 179.60           |                |                  | 2 |
| 9 |               |                 |        |                  |                |                  | <b>K</b> | 147.11        | 74.06           | 130.09  | 65.55            |                |                  | 1 |

# serine hydroxymethyltransferase K277

## AVAL<sup>Succ</sup>KEAMEPEFK

MS/MS Fragmentation of **AVALKEAMEPEFK**

Found in **gi|170082161**, serine hydroxymethyltransferase [Escherichia coli str. K-12 su

Match to Query 3990: 1561.777504 from(781.896028,2+)

From data file zzh64.dta

Click mouse within plot area to zoom in by factor of two about that point

Or,   to  Da

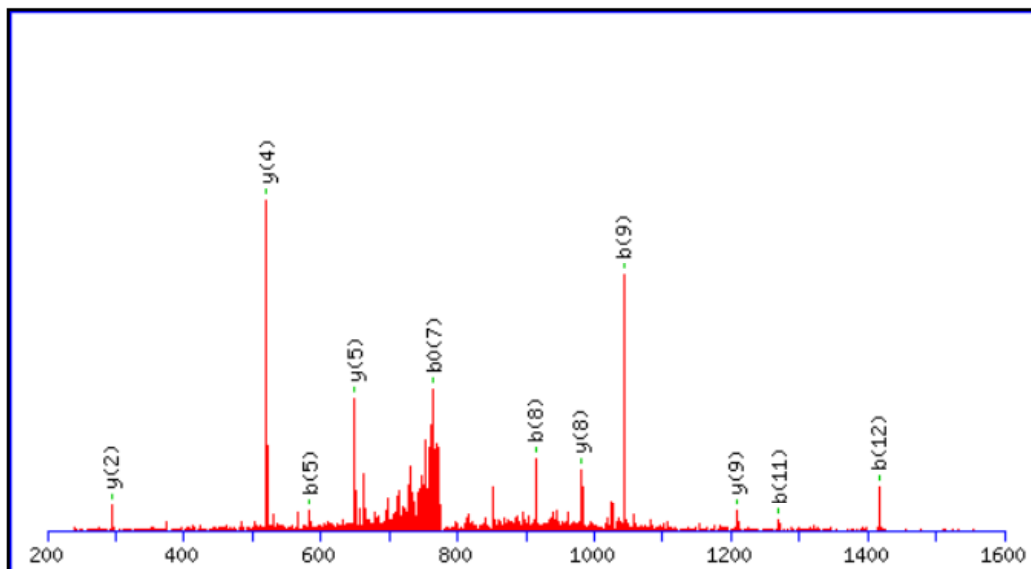

Monoisotopic mass of neutral peptide  $M_r(\text{calc})$ : 1561.77

Variable modifications:

K5 : Succinyl (K)

Ions Score: 39 Expect: 0.0073

Matches (**Bold Red**): 11/122 fragment ions using 30 most intense peaks

| #  | b              | b <sup>++</sup> | b*      | b <sup>*++</sup> | b <sup>0</sup> | b <sup>0++</sup> | Seq. | y              | y <sup>++</sup> | y*      | y <sup>*++</sup> | y <sup>0</sup> | y <sup>0++</sup> | #  |
|----|----------------|-----------------|---------|------------------|----------------|------------------|------|----------------|-----------------|---------|------------------|----------------|------------------|----|
| 1  | 72.04          | 36.53           |         |                  |                |                  | A    |                |                 |         |                  |                |                  | 13 |
| 2  | 171.11         | 86.06           |         |                  |                |                  | V    | 1491.74        | 746.37          | 1474.71 | 737.86           | 1473.73        | 737.37           | 12 |
| 3  | 242.15         | 121.58          |         |                  |                |                  | A    | 1392.67        | 696.84          | 1375.64 | 688.33           | 1374.66        | 687.83           | 11 |
| 4  | 355.23         | 178.12          |         |                  |                |                  | L    | 1321.63        | 661.32          | 1304.61 | 652.81           | 1303.62        | 652.32           | 10 |
| 5  | <b>583.34</b>  | 292.18          | 566.32  | 283.66           |                |                  | K    | <b>1208.55</b> | 604.78          | 1191.52 | 596.27           | 1190.54        | 595.77           | 9  |
| 6  | 712.39         | 356.70          | 695.36  | 348.18           | 694.38         | 347.69           | E    | <b>980.44</b>  | 490.72          | 963.41  | 482.21           | 962.43         | 481.72           | 8  |
| 7  | 783.42         | 392.22          | 766.40  | 383.70           | <b>765.41</b>  | 383.21           | A    | 851.40         | 426.20          | 834.37  | 417.69           | 833.39         | 417.20           | 7  |
| 8  | <b>914.47</b>  | 457.74          | 897.44  | 449.22           | 896.45         | 448.73           | M    | 780.36         | 390.68          | 763.33  | 382.17           | 762.35         | 381.68           | 6  |
| 9  | <b>1043.51</b> | 522.26          | 1026.48 | 513.74           | 1025.50        | 513.25           | E    | <b>649.32</b>  | 325.16          | 632.29  | 316.65           | 631.31         | 316.16           | 5  |
| 10 | 1140.56        | 570.78          | 1123.53 | 562.27           | 1122.55        | 561.78           | P    | <b>520.28</b>  | 260.64          | 503.25  | 252.13           | 502.27         | 251.64           | 4  |
| 11 | <b>1269.60</b> | 635.31          | 1252.58 | 626.79           | 1251.59        | 626.30           | E    | 423.22         | 212.12          | 406.20  | 203.60           | 405.21         | 203.11           | 3  |
| 12 | <b>1416.67</b> | 708.84          | 1399.64 | 700.33           | 1398.66        | 699.83           | F    | <b>294.18</b>  | 147.59          | 277.15  | 139.08           |                |                  | 2  |
| 13 |                |                 |         |                  |                |                  | K    | 147.11         | 74.06           | 130.09  | 65.55            |                |                  | 1  |

# serine hydroxymethyltransferase K293

## TYQQQVA<sup>Succ</sup>KNAK

MS/MS Fragmentation of **TYQQQVAKNAK**

Found in [gi|170082161](#), serine hydroxymethyltransferase [Escherichia coli str. K-12 sul

Match to Query 5902: 1377.694864 from(689.854708,2+)

From data file zzh62.dta

Click mouse within plot area to zoom in by factor of two about that point

Or,   to  Da

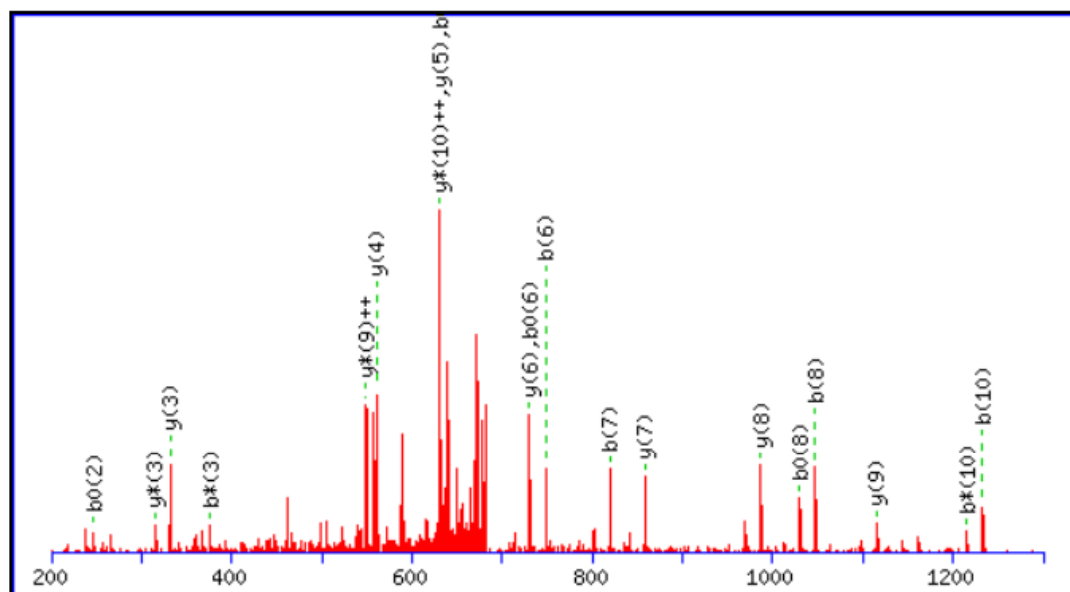

Monoisotopic mass of neutral peptide  $M_r(\text{calc})$ : 1377.69

Variable modifications:

K8 : Succinyl (K)

Ions Score: 50 Expect: 0.00074

| #  | b       | b <sup>++</sup> | b*      | b* <sup>++</sup> | b <sup>0</sup> | b <sup>0++</sup> | Seq. | y       | y <sup>++</sup> | y*      | y* <sup>++</sup> | #  |
|----|---------|-----------------|---------|------------------|----------------|------------------|------|---------|-----------------|---------|------------------|----|
| 1  | 102.05  | 51.53           |         |                  | 84.04          | 42.53            | T    |         |                 |         |                  | 11 |
| 2  | 265.12  | 133.06          |         |                  | 247.11         | 124.06           | Y    | 1277.65 | 639.33          | 1260.62 | 630.81           | 10 |
| 3  | 393.18  | 197.09          | 376.15  | 188.58           | 375.17         | 188.09           | Q    | 1114.59 | 557.80          | 1097.56 | 549.28           | 9  |
| 4  | 521.24  | 261.12          | 504.21  | 252.61           | 503.22         | 252.12           | Q    | 986.53  | 493.77          | 969.50  | 485.25           | 8  |
| 5  | 649.29  | 325.15          | 632.27  | 316.64           | 631.28         | 316.15           | Q    | 858.47  | 429.74          | 841.44  | 421.22           | 7  |
| 6  | 748.36  | 374.68          | 731.34  | 366.17           | 730.35         | 365.68           | V    | 730.41  | 365.71          | 713.38  | 357.20           | 6  |
| 7  | 819.40  | 410.20          | 802.37  | 401.69           | 801.39         | 401.20           | A    | 631.34  | 316.17          | 614.31  | 307.66           | 5  |
| 8  | 1047.51 | 524.26          | 1030.48 | 515.75           | 1029.50        | 515.25           | K    | 560.30  | 280.66          | 543.28  | 272.14           | 4  |
| 9  | 1161.55 | 581.28          | 1144.53 | 572.77           | 1143.54        | 572.28           | N    | 332.19  | 166.60          | 315.17  | 158.09           | 3  |
| 10 | 1232.59 | 616.80          | 1215.56 | 608.29           | 1214.58        | 607.79           | A    | 218.15  | 109.58          | 201.12  | 101.07           | 2  |
| 11 |         |                 |         |                  |                |                  | K    | 147.11  | 74.06           | 130.09  | 65.55            | 1  |

# serine hydroxymethyltransferase K331

## NLTG<sup>Succ</sup>KEADAALGR

MS/MS Fragmentation of **NLTGKEADAALGR**

Found in **gi|170082161**, serine hydroxymethyltransferase [Escherichia coli str. K-12 sub

Match to Query 8623: 1414.706574 from(708.360563,2+)

From data file xie021.dta

Click mouse within plot area to zoom in by factor of two about that point

Or,   to  Da

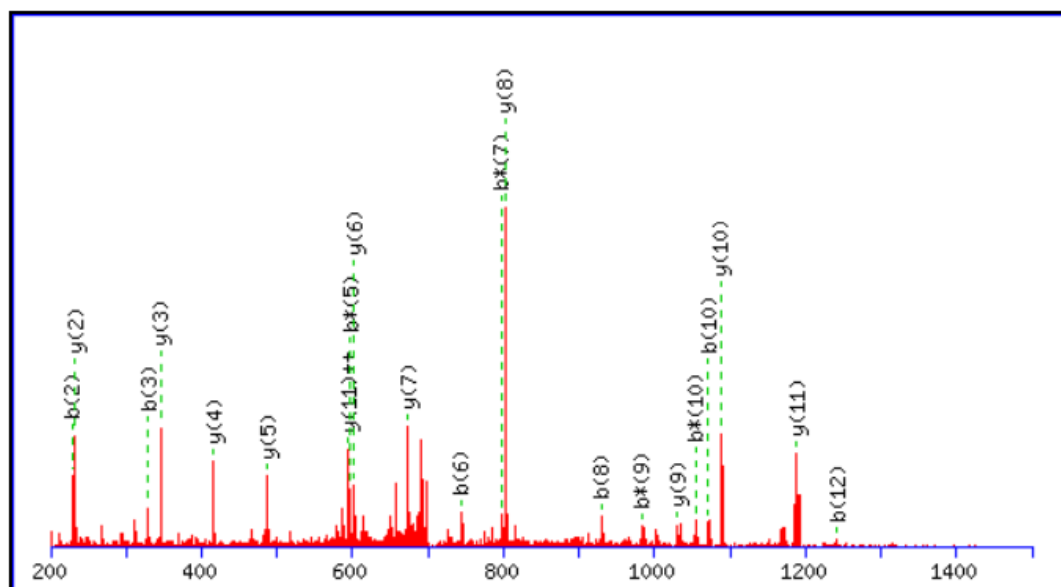

Monoisotopic mass of neutral peptide  $M_r(\text{calc})$ : 1414.71

Variable modifications:

K5 : Succinyl (K)

Ions Score: 61 Expect: 8.2e-005

| #  | b              | b <sup>++</sup> | b*             | b* <sup>++</sup> | b <sup>0</sup> | b <sup>0++</sup> | Seq. | y              | y <sup>++</sup> | y*      | y* <sup>++</sup> | y <sup>0</sup> | y <sup>0++</sup> | #  |
|----|----------------|-----------------|----------------|------------------|----------------|------------------|------|----------------|-----------------|---------|------------------|----------------|------------------|----|
| 1  | 115.05         | 58.03           | 98.02          | 49.52            |                |                  | N    |                |                 |         |                  |                |                  | 13 |
| 2  | <b>228.13</b>  | 114.57          | 211.11         | 106.06           |                |                  | L    | 1301.67        | 651.34          | 1284.64 | 642.83           | 1283.66        | 642.33           | 12 |
| 3  | <b>329.18</b>  | 165.09          | 312.16         | 156.58           | 311.17         | 156.09           | T    | <b>1188.59</b> | <b>594.80</b>   | 1171.56 | 586.28           | 1170.57        | 585.79           | 11 |
| 4  | 386.20         | 193.61          | 369.18         | 185.09           | 368.19         | 184.60           | G    | <b>1087.54</b> | 544.27          | 1070.51 | 535.76           | 1069.53        | 535.27           | 10 |
| 5  | 614.31         | 307.66          | <b>597.29</b>  | 299.15           | 596.30         | 298.66           | K    | <b>1030.52</b> | 515.76          | 1013.49 | 507.25           | 1012.51        | 506.76           | 9  |
| 6  | <b>743.36</b>  | 372.18          | 726.33         | 363.67           | 725.35         | 363.18           | E    | <b>802.41</b>  | 401.71          | 785.38  | 393.19           | 784.39         | 392.70           | 8  |
| 7  | 814.39         | 407.70          | <b>797.37</b>  | 399.19           | 796.38         | 398.70           | A    | <b>673.36</b>  | 337.19          | 656.34  | 328.67           | 655.35         | 328.18           | 7  |
| 8  | <b>929.42</b>  | 465.21          | 912.39         | 456.70           | 911.41         | 456.21           | D    | <b>602.33</b>  | 301.67          | 585.30  | 293.15           | 584.32         | 292.66           | 6  |
| 9  | 1000.46        | 500.73          | <b>983.43</b>  | 492.22           | 982.45         | 491.73           | A    | <b>487.30</b>  | 244.15          | 470.27  | 235.64           |                |                  | 5  |
| 10 | <b>1071.50</b> | 536.25          | <b>1054.47</b> | 527.74           | 1053.48        | 527.25           | A    | <b>416.26</b>  | 208.63          | 399.24  | 200.12           |                |                  | 4  |
| 11 | 1184.58        | 592.79          | 1167.55        | 584.28           | 1166.57        | 583.79           | L    | <b>345.22</b>  | 173.12          | 328.20  | 164.60           |                |                  | 3  |
| 12 | <b>1241.60</b> | 621.30          | 1224.57        | 612.79           | 1223.59        | 612.30           | G    | <b>232.14</b>  | 116.57          | 215.11  | 108.06           |                |                  | 2  |
| 13 |                |                 |                |                  |                |                  | R    | 175.12         | 88.06           | 158.09  | 79.55            |                |                  | 1  |

# serine hydroxymethyltransferase

# K346

## ANITVNSuccKNSVPNDPK

MS/MS Fragmentation of **ANITVNSVPNDPK**

Found in [gij170082161](#), serine hydroxymethyltransferase [Escherichia coli str. K-12 sub

Match to Query 7294: 1709.868324 from(855.941438,2+)

From data file zzh62.dta

Click mouse within plot area to zoom in by factor of two about that point

Or,   to  Da

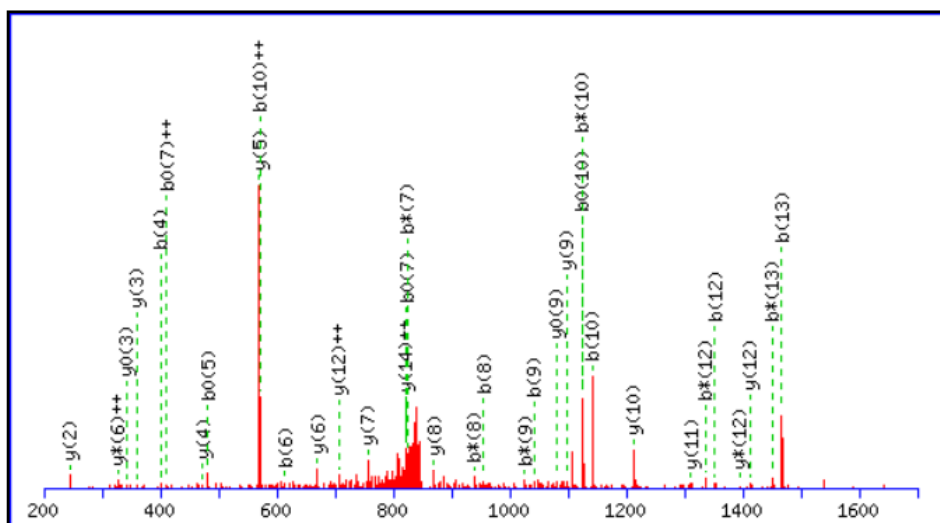

Monoisotopic mass of neutral peptide  $M_r(\text{calc})$ : 1709.86

Variable modifications:

K7 : Succinyl (K)

Ions Score: 31 Expect: 0.054

| #  | b       | b <sup>++</sup> | b*      | b <sup>*++</sup> | b <sup>0</sup> | b <sup>0++</sup> | Seq. | y       | y <sup>++</sup> | y*      | y <sup>*++</sup> | y <sup>0</sup> | y <sup>0++</sup> | #  |
|----|---------|-----------------|---------|------------------|----------------|------------------|------|---------|-----------------|---------|------------------|----------------|------------------|----|
| 1  | 72.04   | 36.53           |         |                  |                |                  | A    |         |                 |         |                  |                |                  | 15 |
| 2  | 186.09  | 93.55           | 169.06  | 85.03            |                |                  | N    | 1639.83 | 820.42          | 1622.80 | 811.90           | 1621.82        | 811.41           | 14 |
| 3  | 299.17  | 150.09          | 282.14  | 141.58           |                |                  | I    | 1525.79 | 763.40          | 1508.76 | 754.88           | 1507.78        | 754.39           | 13 |
| 4  | 400.22  | 200.61          | 383.19  | 192.10           | 382.21         | 191.61           | T    | 1412.70 | 706.85          | 1395.68 | 698.34           | 1394.69        | 697.85           | 12 |
| 5  | 499.29  | 250.15          | 482.26  | 241.63           | 481.28         | 241.14           | V    | 1311.65 | 656.33          | 1294.63 | 647.82           | 1293.64        | 647.33           | 11 |
| 6  | 613.33  | 307.17          | 596.30  | 298.66           | 595.32         | 298.16           | N    | 1212.59 | 606.80          | 1195.56 | 598.28           | 1194.57        | 597.79           | 10 |
| 7  | 841.44  | 421.22          | 824.41  | 412.71           | 823.43         | 412.22           | K    | 1098.54 | 549.77          | 1081.52 | 541.26           | 1080.53        | 540.77           | 9  |
| 8  | 955.48  | 478.25          | 938.46  | 469.73           | 937.47         | 469.24           | N    | 870.43  | 435.72          | 853.41  | 427.21           | 852.42         | 426.71           | 8  |
| 9  | 1042.52 | 521.76          | 1025.49 | 513.25           | 1024.51        | 512.76           | S    | 756.39  | 378.70          | 739.36  | 370.18           | 738.38         | 369.69           | 7  |
| 10 | 1141.58 | 571.30          | 1124.56 | 562.78           | 1123.57        | 562.29           | V    | 669.36  | 335.18          | 652.33  | 326.67           | 651.35         | 326.18           | 6  |
| 11 | 1238.64 | 619.82          | 1221.61 | 611.31           | 1220.63        | 610.82           | P    | 570.29  | 285.65          | 553.26  | 277.13           | 552.28         | 276.64           | 5  |
| 12 | 1352.68 | 676.84          | 1335.65 | 668.33           | 1334.67        | 667.84           | N    | 473.24  | 237.12          | 456.21  | 228.61           | 455.22         | 228.12           | 4  |
| 13 | 1467.71 | 734.36          | 1450.68 | 725.84           | 1449.70        | 725.35           | D    | 359.19  | 180.10          | 342.17  | 171.59           | 341.18         | 171.09           | 3  |
| 14 | 1564.76 | 782.88          | 1547.73 | 774.37           | 1546.75        | 773.88           | P    | 244.17  | 122.59          | 227.14  | 114.07           |                |                  | 2  |
| 15 |         |                 |         |                  |                |                  | K    | 147.11  | 74.06           | 130.09  | 65.55            |                |                  | 1  |

# serine hydroxymethyltransferase

# K354

## NSVPNDP<sup>Succ</sup>KSPFVTSGIR

MS/MS Fragmentation of **NSVPNDPKSPFVTSGIR**

Found in [gi|170082161](#), serine hydroxymethyltransferase [Escherichia coli str. K-12 su

Match to Query 8845: 1913.954624 from(957.984588,2+)

From data file zzh63.dta

Click mouse within plot area to zoom in by factor of two about that point

Or,   to  Da

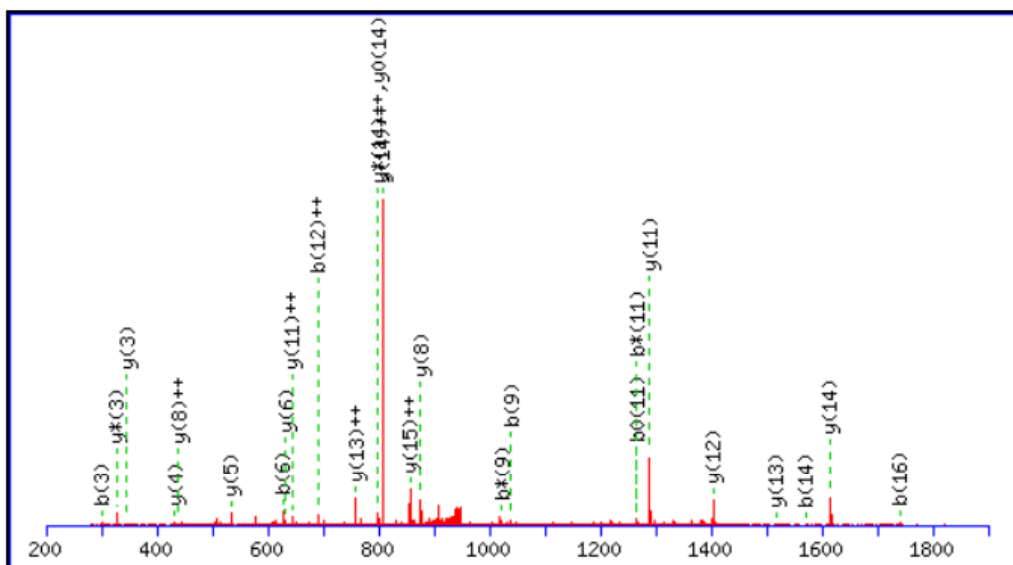

Monoisotopic mass of neutral peptide  $M_r(\text{calc})$ : 1913.95

Variable modifications:

K8 : Succinyl (K)

Ions Score: 33 Expect: 0.046

| #  | b              | b <sup>++</sup> | b*             | b <sup>*++</sup> | b <sup>0</sup> | b <sup>0++</sup> | Seq. | y              | y <sup>++</sup> | y*            | y <sup>*++</sup> | y <sup>0</sup> | y <sup>0++</sup> | #  |
|----|----------------|-----------------|----------------|------------------|----------------|------------------|------|----------------|-----------------|---------------|------------------|----------------|------------------|----|
| 1  | 115.05         | 58.03           | 98.02          | 49.52            |                |                  | N    |                |                 |               |                  |                |                  | 17 |
| 2  | 202.08         | 101.54          | 185.06         | 93.03            | 184.07         | 92.54            | S    | 1800.91        | 900.96          | 1783.89       | 892.45           | 1782.90        | 891.95           | 16 |
| 3  | <b>301.15</b>  | 151.08          | 284.12         | 142.57           | 283.14         | 142.07           | V    | 1713.88        | <b>857.44</b>   | 1696.85       | 848.93           | 1695.87        | 848.44           | 15 |
| 4  | 398.20         | 199.61          | 381.18         | 191.09           | 380.19         | 190.60           | P    | <b>1614.81</b> | <b>807.91</b>   | 1597.79       | <b>799.40</b>    | 1596.80        | <b>798.90</b>    | 14 |
| 5  | 512.25         | 256.63          | 495.22         | 248.11           | 494.24         | 247.62           | N    | <b>1517.76</b> | <b>759.38</b>   | 1500.73       | 750.87           | 1499.75        | 750.38           | 13 |
| 6  | <b>627.27</b>  | 314.14          | 610.25         | 305.63           | 609.26         | 305.13           | D    | <b>1403.72</b> | 702.36          | 1386.69       | 693.85           | 1385.71        | 693.36           | 12 |
| 7  | 724.33         | 362.67          | 707.30         | 354.15           | 706.32         | 353.66           | P    | <b>1288.69</b> | <b>644.85</b>   | 1271.66       | 636.34           | 1270.68        | 635.84           | 11 |
| 8  | 952.44         | 476.72          | 935.41         | 468.21           | 934.43         | 467.72           | K    | 1191.64        | 596.32          | 1174.61       | 587.81           | 1173.63        | 587.32           | 10 |
| 9  | <b>1039.47</b> | 520.24          | <b>1022.44</b> | 511.72           | 1021.46        | 511.23           | S    | 963.53         | 482.27          | 946.50        | 473.75           | 945.52         | 473.26           | 9  |
| 10 | 1136.52        | 568.76          | 1119.50        | 560.25           | 1118.51        | 559.76           | P    | <b>876.49</b>  | <b>438.75</b>   | 859.47        | 430.24           | 858.48         | 429.75           | 8  |
| 11 | 1283.59        | 642.30          | <b>1266.56</b> | 633.79           | <b>1265.58</b> | 633.29           | F    | 779.44         | 390.22          | 762.41        | 381.71           | 761.43         | 381.22           | 7  |
| 12 | 1382.66        | <b>691.83</b>   | 1365.63        | 683.32           | 1364.65        | 682.83           | V    | <b>632.37</b>  | 316.69          | 615.35        | 308.18           | 614.36         | 307.68           | 6  |
| 13 | 1483.71        | 742.36          | 1466.68        | 733.84           | 1465.70        | 733.35           | T    | <b>533.30</b>  | 267.16          | 516.28        | 258.64           | 515.29         | 258.15           | 5  |
| 14 | <b>1570.74</b> | 785.87          | 1553.71        | 777.36           | 1552.73        | 776.87           | S    | <b>432.26</b>  | 216.63          | 415.23        | 208.12           | 414.25         | 207.63           | 4  |
| 15 | 1627.76        | 814.38          | 1610.73        | 805.87           | 1609.75        | 805.38           | G    | <b>345.22</b>  | 173.12          | <b>328.20</b> | 164.60           |                |                  | 3  |
| 16 | <b>1740.84</b> | 870.93          | 1723.82        | 862.41           | 1722.83        | 861.92           | I    | 288.20         | 144.61          | 271.18        | 136.09           |                |                  | 2  |
| 17 |                |                 |                |                  |                |                  | R    | 175.12         | 88.06           | 158.09        | 79.55            |                |                  | 1  |

# glyceraldehyde-3-phosphate dehydrogenase A K115

## HITAGA<sup>Succ</sup>KK

MS/MS Fragmentation of **HITAGAKK**

Found in [gi|170081435](#), glyceraldehyde-3-phosphate dehydrogenase A [Escherichia co

Match to Query 1957: 924.506994 from(463.260773,2+)

From data file zzh62.dta

Click mouse within plot area to zoom in by factor of two about that point

Or,   to  Da

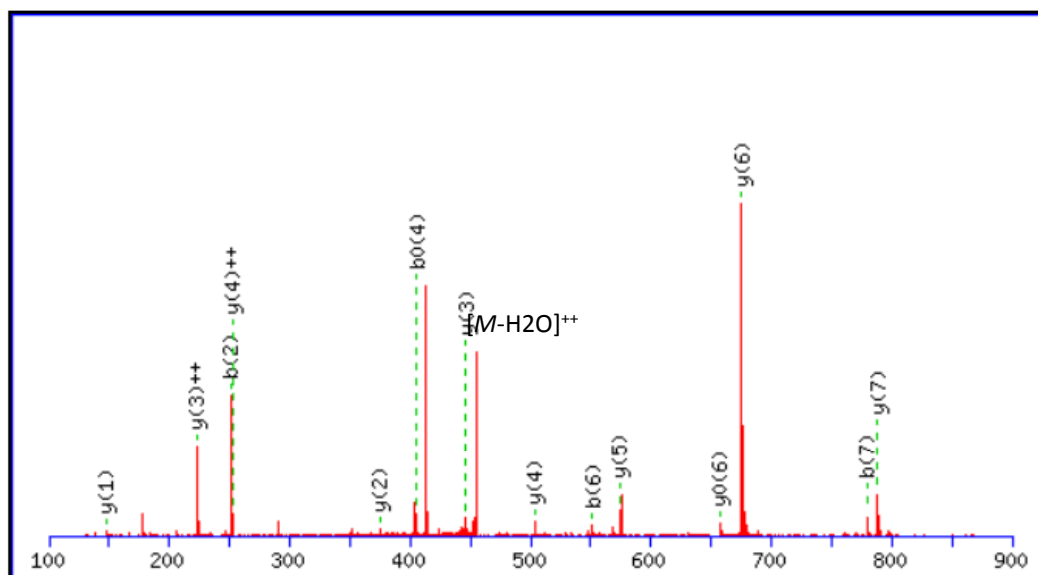

Monoisotopic mass of neutral peptide Mr(calc): 924.50

Variable modifications:

K7 : Succinyl (K)

Ions Score: 35 Expect: 0.016

Matches (**Bold Red**): 14/58 fragment ions using 45 most intense peaks

| # | b             | b <sup>++</sup> | b <sup>*</sup> | b <sup>*++</sup> | b <sup>0</sup> | b <sup>0++</sup> | Seq. | y             | y <sup>++</sup> | y <sup>*</sup> | y <sup>*++</sup> | y <sup>0</sup> | y <sup>0++</sup> | # |
|---|---------------|-----------------|----------------|------------------|----------------|------------------|------|---------------|-----------------|----------------|------------------|----------------|------------------|---|
| 1 | 138.07        | 69.54           |                |                  |                |                  | H    |               |                 |                |                  |                |                  | 8 |
| 2 | <b>251.15</b> | 126.08          |                |                  |                |                  | I    | <b>788.45</b> | 394.73          | 771.42         | 386.22           | 770.44         | 385.72           | 7 |
| 3 | 352.20        | 176.60          |                |                  | 334.19         | 167.60           | T    | <b>675.37</b> | 338.19          | 658.34         | 329.67           | <b>657.36</b>  | 329.18           | 6 |
| 4 | 423.24        | 212.12          |                |                  | <b>405.22</b>  | 203.12           | A    | <b>574.32</b> | 287.66          | 557.29         | 279.15           |                |                  | 5 |
| 5 | 480.26        | 240.63          |                |                  | 462.25         | 231.63           | G    | <b>503.28</b> | <b>252.14</b>   | 486.26         | 243.63           |                |                  | 4 |
| 6 | <b>551.29</b> | 276.15          |                |                  | 533.28         | 267.15           | A    | <b>446.26</b> | <b>223.63</b>   | 429.23         | 215.12           |                |                  | 3 |
| 7 | <b>779.40</b> | 390.21          | 762.38         | 381.69           | 761.39         | 381.20           | K    | <b>375.22</b> | 188.12          | 358.20         | 179.60           |                |                  | 2 |
| 8 |               |                 |                |                  |                |                  | K    | <b>147.11</b> | 74.06           | 130.09         | 65.55            |                |                  | 1 |



# glyceraldehyde-3-phosphate dehydrogenase A K124

## VVMTGPS<sup>Succ</sup>KDNTPMFVK

MS/MS Fragmentation of **VVMTGPSKDNTPMFVK**

Found in [gi|170081435](#), glyceraldehyde-3-phosphate dehydrogenase A [Escherichia coli

Match to Query 8597: 1849.904084 from(925.959318,2+)

From data file zzh63.dta

Click mouse within plot area to zoom in by factor of two about that point

Or,   to  Da

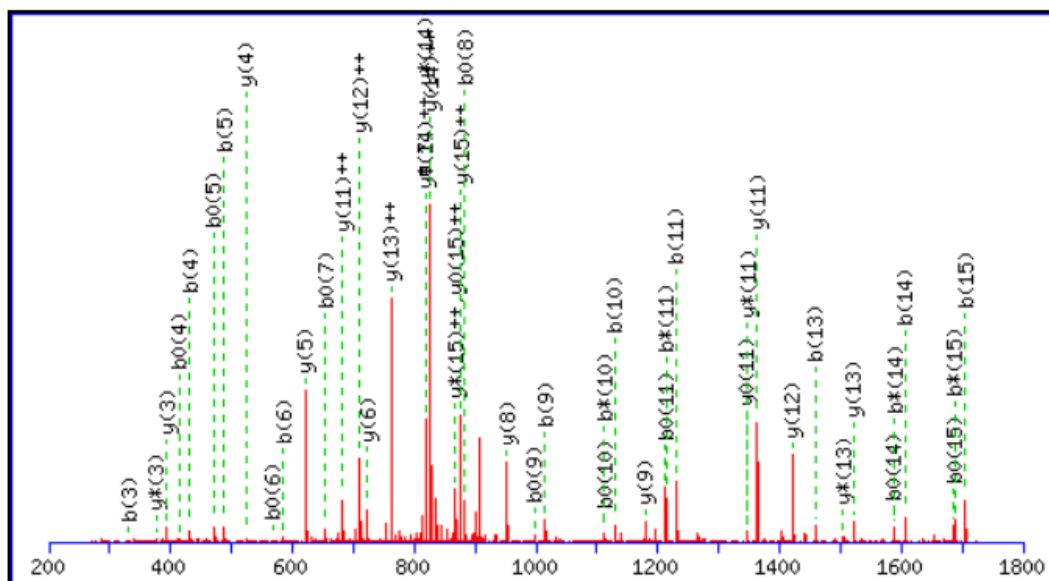

Monoisotopic mass of neutral peptide  $M_r(\text{calc})$ : 1849.90

Variable modifications:

K8 : Succinyl (K)

Ions Score: 62 Expect: 5.2e-005

| #  | b       | b <sup>++</sup> | b*      | b* <sup>++</sup> | b <sup>0</sup> | b <sup>0++</sup> | Seq. | y       | y <sup>++</sup> | y*      | y* <sup>++</sup> | y <sup>0</sup> | y <sup>0++</sup> | #  |
|----|---------|-----------------|---------|------------------|----------------|------------------|------|---------|-----------------|---------|------------------|----------------|------------------|----|
| 1  | 100.08  | 50.54           |         |                  |                |                  | V    |         |                 |         |                  |                |                  | 16 |
| 2  | 199.14  | 100.08          |         |                  |                |                  | V    | 1751.83 | 876.42          | 1734.81 | 867.91           | 1733.82        | 867.42           | 15 |
| 3  | 330.18  | 165.60          |         |                  |                |                  | M    | 1652.77 | 826.89          | 1635.74 | 818.37           | 1634.76        | 817.88           | 14 |
| 4  | 431.23  | 216.12          |         |                  | 413.22         | 207.11           | T    | 1521.73 | 761.37          | 1504.70 | 752.85           | 1503.71        | 752.36           | 13 |
| 5  | 488.25  | 244.63          |         |                  | 470.24         | 235.63           | G    | 1420.68 | 710.84          | 1403.65 | 702.33           | 1402.67        | 701.84           | 12 |
| 6  | 585.31  | 293.16          |         |                  | 567.30         | 284.15           | P    | 1363.66 | 682.33          | 1346.63 | 673.82           | 1345.65        | 673.33           | 11 |
| 7  | 672.34  | 336.67          |         |                  | 654.33         | 327.67           | S    | 1266.60 | 633.81          | 1249.58 | 625.29           | 1248.59        | 624.80           | 10 |
| 8  | 900.45  | 450.73          | 883.42  | 442.22           | 882.44         | 441.72           | K    | 1179.57 | 590.29          | 1162.54 | 581.78           | 1161.56        | 581.28           | 9  |
| 9  | 1015.48 | 508.24          | 998.45  | 499.73           | 997.47         | 499.24           | D    | 951.46  | 476.23          | 934.43  | 467.72           | 933.45         | 467.23           | 8  |
| 10 | 1129.52 | 565.26          | 1112.49 | 556.75           | 1111.51        | 556.26           | N    | 836.43  | 418.72          | 819.41  | 410.21           | 818.42         | 409.72           | 7  |
| 11 | 1230.57 | 615.79          | 1213.54 | 607.27           | 1212.56        | 606.78           | T    | 722.39  | 361.70          | 705.36  | 353.19           | 704.38         | 352.69           | 6  |
| 12 | 1327.62 | 664.31          | 1310.59 | 655.80           | 1309.61        | 655.31           | P    | 621.34  | 311.18          | 604.32  | 302.66           |                |                  | 5  |
| 13 | 1458.66 | 729.83          | 1441.63 | 721.32           | 1440.65        | 720.83           | M    | 524.29  | 262.65          | 507.26  | 254.14           |                |                  | 4  |
| 14 | 1605.73 | 803.37          | 1588.70 | 794.85           | 1587.72        | 794.36           | F    | 393.25  | 197.13          | 376.22  | 188.62           |                |                  | 3  |
| 15 | 1704.80 | 852.90          | 1687.77 | 844.39           | 1686.79        | 843.90           | V    | 246.18  | 123.59          | 229.15  | 115.08           |                |                  | 2  |
| 16 |         |                 |         |                  |                |                  | K    | 147.11  | 74.06           | 130.09  | 65.55            |                |                  | 1  |

# glyceraldehyde-3-phosphate dehydrogenase A K132

## DNTPMFV<sup>Succ</sup>KGANFDK

MS/MS Fragmentation of **DNTPMFVKGANFDK**

Found in [gi|170081435](#), glyceraldehyde-3-phosphate dehydrogenase A [Escherichia coli

Match to Query 7767: 1682.767984 from(842.391268,2+)

From data file zzh63.dta

Click mouse within plot area to zoom in by factor of two about that point

Or,   to  Da

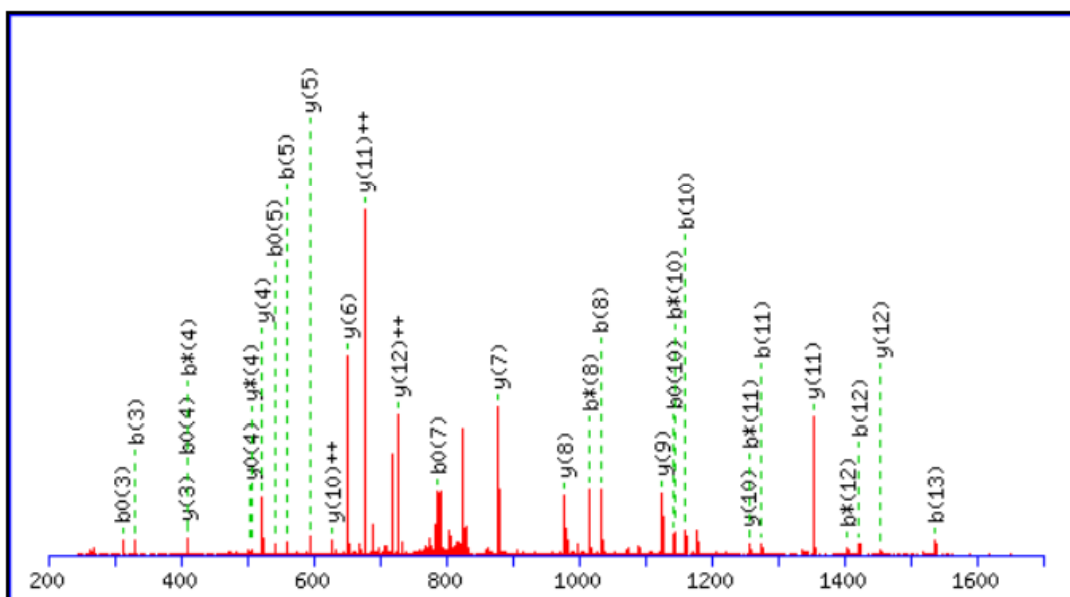

Monoisotopic mass of neutral peptide  $M_r(\text{calc})$ : 1682.76

Variable modifications:

K8 : Succinyl (K)

Ions Score: 69 Expect:  $9.1e-006$

| #  | b              | b <sup>++</sup> | b*             | b <sup>*++</sup> | b <sup>0</sup> | b <sup>0++</sup> | Seq. | y              | y <sup>++</sup> | y*            | y <sup>*++</sup> | y <sup>0</sup> | y <sup>0++</sup> | #  |
|----|----------------|-----------------|----------------|------------------|----------------|------------------|------|----------------|-----------------|---------------|------------------|----------------|------------------|----|
| 1  | 116.03         | 58.52           |                |                  | 98.02          | 49.52            | D    |                |                 |               |                  |                |                  | 14 |
| 2  | 230.08         | 115.54          | 213.05         | 107.03           | 212.07         | 106.54           | N    | 1568.74        | 784.87          | 1551.71       | 776.36           | 1550.73        | 775.87           | 13 |
| 3  | <b>331.12</b>  | 166.07          | 314.10         | 157.55           | <b>313.11</b>  | 157.06           | T    | <b>1454.70</b> | <b>727.85</b>   | 1437.67       | 719.34           | 1436.69        | 718.85           | 12 |
| 4  | 428.18         | 214.59          | <b>411.15</b>  | 206.08           | <b>410.17</b>  | 205.59           | P    | <b>1353.65</b> | <b>677.33</b>   | 1336.62       | 668.82           | 1335.64        | 668.32           | 11 |
| 5  | <b>559.22</b>  | 280.11          | 542.19         | 271.60           | <b>541.21</b>  | 271.11           | M    | <b>1256.60</b> | <b>628.80</b>   | 1239.57       | 620.29           | 1238.59        | 619.80           | 10 |
| 6  | 706.29         | 353.65          | 689.26         | 345.13           | 688.28         | 344.64           | F    | <b>1125.56</b> | 563.28          | 1108.53       | 554.77           | 1107.55        | 554.28           | 9  |
| 7  | 805.35         | 403.18          | 788.33         | 394.67           | <b>787.34</b>  | 394.18           | V    | <b>978.49</b>  | 489.75          | 961.46        | 481.23           | 960.48         | 480.74           | 8  |
| 8  | <b>1033.47</b> | 517.24          | <b>1016.44</b> | 508.72           | 1015.46        | 508.23           | K    | <b>879.42</b>  | 440.21          | 862.39        | 431.70           | 861.41         | 431.21           | 7  |
| 9  | 1090.49        | 545.75          | 1073.46        | 537.23           | 1072.48        | 536.74           | G    | <b>651.31</b>  | 326.16          | 634.28        | 317.65           | 633.30         | 317.15           | 6  |
| 10 | <b>1161.52</b> | 581.27          | <b>1144.50</b> | 572.75           | <b>1143.51</b> | 572.26           | A    | <b>594.29</b>  | 297.65          | 577.26        | 289.13           | 576.28         | 288.64           | 5  |
| 11 | <b>1275.57</b> | 638.29          | <b>1258.54</b> | 629.77           | 1257.56        | 629.28           | N    | <b>523.25</b>  | 262.13          | <b>506.22</b> | 253.62           | <b>505.24</b>  | 253.12           | 4  |
| 12 | <b>1422.64</b> | 711.82          | <b>1405.61</b> | 703.31           | 1404.63        | 702.82           | F    | <b>409.21</b>  | 205.11          | 392.18        | 196.59           | 391.20         | 196.10           | 3  |
| 13 | <b>1537.66</b> | 769.34          | 1520.64        | 760.82           | 1519.65        | 760.33           | D    | 262.14         | 131.57          | 245.11        | 123.06           | 244.13         | 122.57           | 2  |
| 14 |                |                 |                |                  |                |                  | K    | 147.11         | 74.06           | 130.09        | 65.55            |                |                  | 1  |

# glyceraldehyde-3-phosphate dehydrogenase A K192

## TVDGPSH<sup>Succ</sup>KDWR

MS/MS Fragmentation of **TVDGPSHKDWR**

Found in [gi|170081435](#), glyceraldehyde-3-phosphate dehydrogenase A [Escherichia coli

Match to Query 5447: 1396.642854 from(699.328703,2+)

From data file zzh61.dta

Click mouse within plot area to zoom in by factor of two about that point

Or,   to  Da

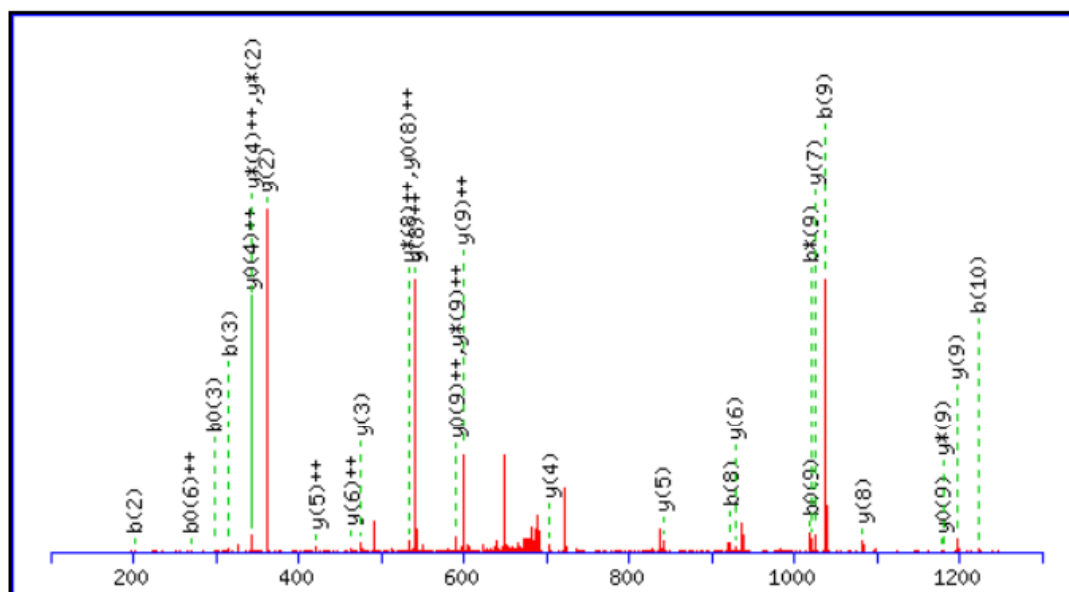

Monoisotopic mass of neutral peptide  $M_r(\text{calc})$ : 1396.64

Variable modifications:

K8 : Succinyl (K)

Ions Score: 30 Expect: 0.049

| #  | b              | b <sup>++</sup> | b*             | b <sup>*++</sup> | b <sup>0</sup> | b <sup>0++</sup> | Seq. | y              | y <sup>++</sup> | y*             | y <sup>*++</sup> | y <sup>0</sup> | y <sup>0++</sup> | #  |
|----|----------------|-----------------|----------------|------------------|----------------|------------------|------|----------------|-----------------|----------------|------------------|----------------|------------------|----|
| 1  | 102.05         | 51.53           |                |                  | 84.04          | 42.53            | T    |                |                 |                |                  |                |                  | 11 |
| 2  | <b>201.12</b>  | 101.07          |                |                  | 183.11         | 92.06            | V    | 1296.60        | 648.80          | 1279.57        | 640.29           | 1278.59        | 639.80           | 10 |
| 3  | <b>316.15</b>  | 158.58          |                |                  | <b>298.14</b>  | 149.57           | D    | <b>1197.53</b> | <b>599.27</b>   | <b>1180.50</b> | <b>590.75</b>    | <b>1179.52</b> | <b>590.26</b>    | 9  |
| 4  | 373.17         | 187.09          |                |                  | 355.16         | 178.08           | G    | <b>1082.50</b> | <b>541.75</b>   | 1065.47        | <b>533.24</b>    | 1064.49        | <b>532.75</b>    | 8  |
| 5  | 470.22         | 235.62          |                |                  | 452.21         | 226.61           | P    | <b>1025.48</b> | 513.24          | 1008.45        | 504.73           | 1007.47        | 504.24           | 7  |
| 6  | 557.26         | 279.13          |                |                  | 539.25         | <b>270.13</b>    | S    | <b>928.43</b>  | <b>464.72</b>   | 911.40         | 456.20           | 910.42         | 455.71           | 6  |
| 7  | 694.32         | 347.66          |                |                  | 676.30         | 338.66           | H    | <b>841.40</b>  | <b>421.20</b>   | 824.37         | 412.69           | 823.38         | 412.20           | 5  |
| 8  | <b>922.43</b>  | 461.72          | 905.40         | 453.20           | 904.42         | 452.71           | K    | <b>704.34</b>  | 352.67          | 687.31         | <b>344.16</b>    | 686.33         | <b>343.67</b>    | 4  |
| 9  | <b>1037.45</b> | 519.23          | <b>1020.43</b> | 510.72           | <b>1019.44</b> | 510.23           | D    | <b>476.23</b>  | 238.62          | 459.20         | 230.10           | 458.21         | 229.61           | 3  |
| 10 | <b>1223.53</b> | 612.27          | 1206.51        | 603.76           | 1205.52        | 603.26           | W    | <b>361.20</b>  | 181.10          | <b>344.17</b>  | 172.59           |                |                  | 2  |
| 11 |                |                 |                |                  |                |                  | R    | 175.12         | 88.06           | 158.09         | 79.55            |                |                  | 1  |

# glyceraldehyde-3-phosphate dehydrogenase A K213

## GASQNIIPSSTGAA<sup>Succ</sup>KAVGK

MS/MS Fragmentation of **GASQNIIPSSTGAAKAVGK**

Found in [gi|170081435](#), glyceraldehyde-3-phosphate dehydrogenase A [Escherichia coli

Match to Query 8621: 1855.973664 from(928.994108,2+)

From data file zzh63.dta

Click mouse within plot area to zoom in by factor of two about that point

Or, Plot from  to  Da

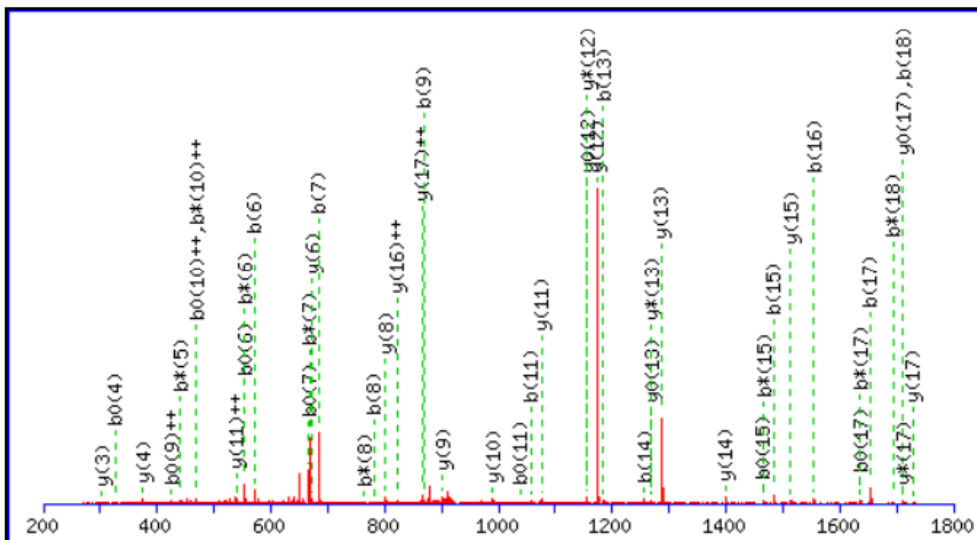

Monoisotopic mass of neutral peptide  $M_r(\text{calc})$ : 1855.96

Variable modifications:

K15 : Succinyl (K)

Ions Score: 61 Expect: 7.8e-005

| #  | b              | b <sup>++</sup> | b*             | b* <sup>++</sup> | b <sup>0</sup> | b <sup>0</sup> <sup>++</sup> | Seq. | y              | y <sup>++</sup> | y*             | y* <sup>++</sup> | y <sup>0</sup> | y <sup>0</sup> <sup>++</sup> | #  |
|----|----------------|-----------------|----------------|------------------|----------------|------------------------------|------|----------------|-----------------|----------------|------------------|----------------|------------------------------|----|
| 1  | 58.03          | 29.52           |                |                  |                |                              | G    |                |                 |                |                  |                |                              | 19 |
| 2  | 129.07         | 65.04           |                |                  |                |                              | A    | 1799.95        | 900.48          | 1782.92        | 891.97           | 1781.94        | 891.47                       | 18 |
| 3  | 216.10         | 108.55          |                |                  | 198.09         | 99.55                        | S    | <b>1728.91</b> | <b>864.96</b>   | <b>1711.89</b> | 856.45           | <b>1710.90</b> | 855.95                       | 17 |
| 4  | 344.16         | 172.58          | 327.13         | 164.07           | <b>326.15</b>  | 163.58                       | Q    | 1641.88        | <b>821.44</b>   | 1624.85        | 812.93           | 1623.87        | 812.44                       | 16 |
| 5  | 458.20         | 229.60          | <b>441.17</b>  | 221.09           | 440.19         | 220.60                       | N    | <b>1513.82</b> | 757.41          | 1496.80        | 748.90           | 1495.81        | 748.41                       | 15 |
| 6  | <b>571.28</b>  | 286.15          | <b>554.26</b>  | 277.63           | <b>553.27</b>  | 277.14                       | I    | <b>1399.78</b> | 700.39          | 1382.75        | 691.88           | 1381.77        | 691.39                       | 14 |
| 7  | <b>684.37</b>  | 342.69          | <b>667.34</b>  | 334.17           | <b>666.36</b>  | 333.68                       | I    | <b>1286.70</b> | 643.85          | <b>1269.67</b> | 635.34           | <b>1268.68</b> | 634.85                       | 13 |
| 8  | <b>781.42</b>  | 391.21          | <b>764.39</b>  | 382.70           | 763.41         | 382.21                       | P    | <b>1173.61</b> | 587.31          | <b>1156.58</b> | 578.80           | <b>1155.60</b> | 578.30                       | 12 |
| 9  | <b>868.45</b>  | 434.73          | 851.43         | 426.22           | 850.44         | <b>425.72</b>                | S    | <b>1076.56</b> | <b>538.78</b>   | 1059.53        | 530.27           | 1058.55        | 529.78                       | 11 |
| 10 | 955.48         | 478.25          | 938.46         | <b>469.73</b>    | 937.47         | <b>469.24</b>                | S    | <b>989.53</b>  | 495.27          | 972.50         | 486.75           | 971.52         | 486.26                       | 10 |
| 11 | <b>1056.53</b> | 528.77          | 1039.51        | 520.26           | <b>1038.52</b> | 519.76                       | T    | <b>902.49</b>  | 451.75          | 885.47         | 443.24           | 884.48         | 442.75                       | 9  |
| 12 | 1113.55        | 557.28          | 1096.53        | 548.77           | 1095.54        | 548.28                       | G    | <b>801.45</b>  | 401.23          | 784.42         | 392.71           |                |                              | 8  |
| 13 | <b>1184.59</b> | 592.80          | 1167.56        | 584.29           | 1166.58        | 583.79                       | A    | 744.43         | 372.72          | 727.40         | 364.20           |                |                              | 7  |
| 14 | <b>1255.63</b> | 628.32          | 1238.60        | 619.80           | 1237.62        | 619.31                       | A    | <b>673.39</b>  | 337.20          | 656.36         | 328.68           |                |                              | 6  |
| 15 | <b>1483.74</b> | 742.37          | <b>1466.71</b> | 733.86           | <b>1465.73</b> | 733.37                       | K    | 602.35         | 301.68          | 585.32         | 293.17           |                |                              | 5  |
| 16 | <b>1554.78</b> | 777.89          | 1537.75        | 769.38           | 1536.77        | 768.89                       | A    | <b>374.24</b>  | 187.62          | 357.21         | 179.11           |                |                              | 4  |
| 17 | <b>1653.84</b> | 827.43          | <b>1636.82</b> | 818.91           | <b>1635.83</b> | 818.42                       | V    | <b>303.20</b>  | 152.10          | 286.18         | 143.59           |                |                              | 3  |
| 18 | <b>1710.87</b> | 855.94          | <b>1693.84</b> | 847.42           | 1692.86        | 846.93                       | G    | 204.13         | 102.57          | 187.11         | 94.06            |                |                              | 2  |
| 19 |                |                 |                |                  |                |                              | K    | 147.11         | 74.06           | 130.09         | 65.55            |                |                              | 1  |

# glyceraldehyde-3-phosphate dehydrogenase A K217

## AVG<sup>Succ</sup>KVLPELNGK

MS/MS Fragmentation of **AVGKVLPELNGK**

Found in **gi|170081435**, glyceraldehyde-3-phosphate dehydrogenase A [Escherichia coli

Match to Query 5028: 1323.746614 from(662.880583,2+)

From data file zzh61.dta

Click mouse within plot area to zoom in by factor of two about that point

Or,   to  Da

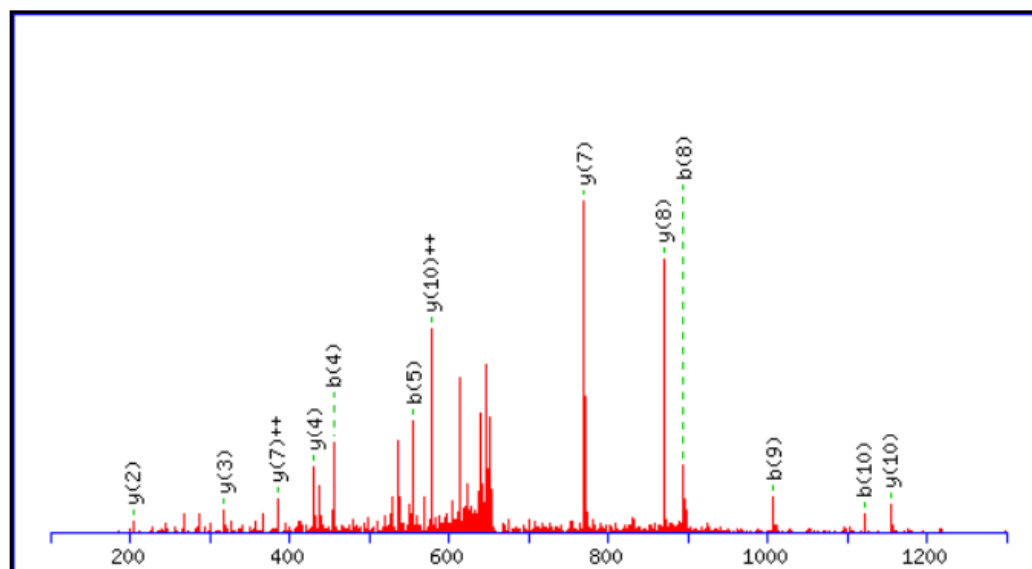

Monoisotopic mass of neutral peptide  $M_r(\text{calc})$ : 1323.74

Variable modifications:

K4 : Succinyl (K)

Ions Score: 34 Expect: 0.021

| #  | b       | b <sup>++</sup> | b*      | b <sup>*++</sup> | b <sup>0</sup> | b <sup>0++</sup> | Seq. | y       | y <sup>++</sup> | y*      | y <sup>*++</sup> | y <sup>0</sup> | y <sup>0++</sup> | #  |
|----|---------|-----------------|---------|------------------|----------------|------------------|------|---------|-----------------|---------|------------------|----------------|------------------|----|
| 1  | 72.04   | 36.53           |         |                  |                |                  | A    |         |                 |         |                  |                |                  | 12 |
| 2  | 171.11  | 86.06           |         |                  |                |                  | V    | 1253.71 | 627.36          | 1236.68 | 618.85           | 1235.70        | 618.35           | 11 |
| 3  | 228.13  | 114.57          |         |                  |                |                  | G    | 1154.64 | 577.82          | 1137.61 | 569.31           | 1136.63        | 568.82           | 10 |
| 4  | 456.25  | 228.63          | 439.22  | 220.11           |                |                  | K    | 1097.62 | 549.31          | 1080.59 | 540.80           | 1079.61        | 540.31           | 9  |
| 5  | 555.31  | 278.16          | 538.29  | 269.65           |                |                  | V    | 869.51  | 435.26          | 852.48  | 426.74           | 851.50         | 426.25           | 8  |
| 6  | 668.40  | 334.70          | 651.37  | 326.19           |                |                  | L    | 770.44  | 385.72          | 753.41  | 377.21           | 752.43         | 376.72           | 7  |
| 7  | 765.45  | 383.23          | 748.42  | 374.72           |                |                  | P    | 657.36  | 329.18          | 640.33  | 320.67           | 639.35         | 320.18           | 6  |
| 8  | 894.49  | 447.75          | 877.47  | 439.24           | 876.48         | 438.74           | E    | 560.30  | 280.66          | 543.28  | 272.14           | 542.29         | 271.65           | 5  |
| 9  | 1007.58 | 504.29          | 990.55  | 495.78           | 989.57         | 495.29           | L    | 431.26  | 216.13          | 414.23  | 207.62           |                |                  | 4  |
| 10 | 1121.62 | 561.31          | 1104.59 | 552.80           | 1103.61        | 552.31           | N    | 318.18  | 159.59          | 301.15  | 151.08           |                |                  | 3  |
| 11 | 1178.64 | 589.82          | 1161.61 | 581.31           | 1160.63        | 580.82           | G    | 204.13  | 102.57          | 187.11  | 94.06            |                |                  | 2  |
| 12 |         |                 |         |                  |                |                  | K    | 147.11  | 74.06           | 130.09  | 65.55            |                |                  | 1  |

# glyceraldehyde-3-phosphate dehydrogenase A K225

## VLPELNG<sup>Succ</sup>KLTGMAFR

MS/MS Fragmentation of **VLPELNGKLTGMAFR**

Found in [gi|170081435](#), glyceraldehyde-3-phosphate dehydrogenase A [Escherichia coli

Match to Query 4867: 1744.926554 from(873.470553,2+)

From data file zzh64.dta

Click mouse within plot area to zoom in by factor of two about that point

Or,   to  Da

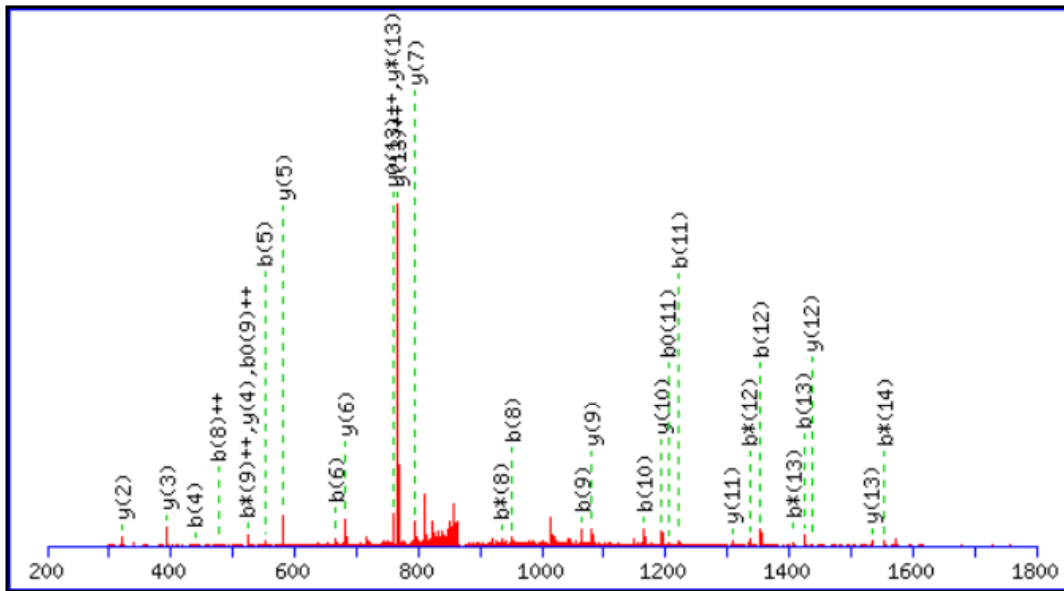

Monoisotopic mass of neutral peptide  $M_r(\text{calc})$ : 1744.92

Variable modifications:

K8 : Succinyl (K)

Ions Score: 61 Expect: 5.1e-005

| #  | b       | b <sup>++</sup> | b*      | b <sup>*++</sup> | b <sup>0</sup> | b <sup>0++</sup> | Seq. | y       | y <sup>++</sup> | y*      | y <sup>*++</sup> | y <sup>0</sup> | y <sup>0++</sup> | #  |
|----|---------|-----------------|---------|------------------|----------------|------------------|------|---------|-----------------|---------|------------------|----------------|------------------|----|
| 1  | 100.08  | 50.54           |         |                  |                |                  | V    |         |                 |         |                  |                |                  | 15 |
| 2  | 213.16  | 107.08          |         |                  |                |                  | L    | 1646.86 | 823.93          | 1629.83 | 815.42           | 1628.85        | 814.93           | 14 |
| 3  | 310.21  | 155.61          |         |                  |                |                  | P    | 1533.77 | 767.39          | 1516.75 | 758.88           | 1515.76        | 758.38           | 13 |
| 4  | 439.26  | 220.13          |         |                  | 421.24         | 211.13           | E    | 1436.72 | 718.86          | 1419.69 | 710.35           | 1418.71        | 709.86           | 12 |
| 5  | 552.34  | 276.67          |         |                  | 534.33         | 267.67           | L    | 1307.68 | 654.34          | 1290.65 | 645.83           | 1289.67        | 645.34           | 11 |
| 6  | 666.38  | 333.69          | 649.36  | 325.18           | 648.37         | 324.69           | N    | 1194.59 | 597.80          | 1177.57 | 589.29           | 1176.58        | 588.80           | 10 |
| 7  | 723.40  | 362.21          | 706.38  | 353.69           | 705.39         | 353.20           | G    | 1080.55 | 540.78          | 1063.52 | 532.27           | 1062.54        | 531.77           | 9  |
| 8  | 951.51  | 476.26          | 934.49  | 467.75           | 933.50         | 467.26           | K    | 1023.53 | 512.27          | 1006.50 | 503.75           | 1005.52        | 503.26           | 8  |
| 9  | 1064.60 | 532.80          | 1047.57 | 524.29           | 1046.59        | 523.80           | L    | 795.42  | 398.21          | 778.39  | 389.70           | 777.41         | 389.21           | 7  |
| 10 | 1165.65 | 583.33          | 1148.62 | 574.81           | 1147.64        | 574.32           | T    | 682.33  | 341.67          | 665.31  | 333.16           | 664.32         | 332.67           | 6  |
| 11 | 1222.67 | 611.84          | 1205.64 | 603.32           | 1204.66        | 602.83           | G    | 581.29  | 291.15          | 564.26  | 282.63           |                |                  | 5  |
| 12 | 1353.71 | 677.36          | 1336.68 | 668.84           | 1335.70        | 668.35           | M    | 524.26  | 262.64          | 507.24  | 254.12           |                |                  | 4  |
| 13 | 1424.75 | 712.88          | 1407.72 | 704.36           | 1406.73        | 703.87           | A    | 393.22  | 197.12          | 376.20  | 188.60           |                |                  | 3  |
| 14 | 1571.81 | 786.41          | 1554.79 | 777.90           | 1553.80        | 777.41           | F    | 322.19  | 161.60          | 305.16  | 153.08           |                |                  | 2  |
| 15 |         |                 |         |                  |                |                  | R    | 175.12  | 88.06           | 158.09  | 79.55            |                |                  | 1  |

# glyceraldehyde-3-phosphate dehydrogenase A K249

**LE<sup>Succ</sup>KAATYEQIK**

MS/MS Fragmentation of **LEKAATYEQIK**

Found in **gi170081435**, glyceraldehyde-3-phosphate dehydrogenase A [Escherichia coli

Match to Query 6088: 1392.718544 from(697.366548,2+)

From data file zzh63.dta

Click mouse within plot area to zoom in by factor of two about that point

Or,   to  Da

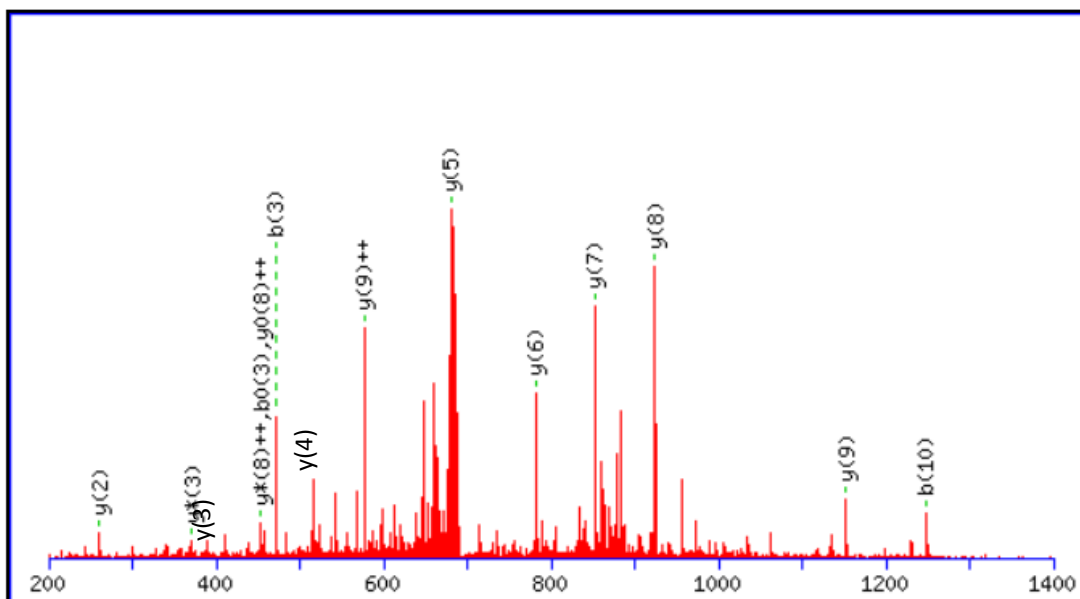

Monoisotopic mass of neutral peptide  $M_r(\text{calc})$ : 1392.71

Variable modifications:

K3 : Succinyl (K)

Ions Score: 44 Expect: 0.003

| #  | b       | b <sup>++</sup> | b*      | b <sup>*++</sup> | b <sup>0</sup> | b <sup>0++</sup> | Seq. | y       | y <sup>++</sup> | y*      | y <sup>*++</sup> | y <sup>0</sup> | y <sup>0++</sup> | #  |
|----|---------|-----------------|---------|------------------|----------------|------------------|------|---------|-----------------|---------|------------------|----------------|------------------|----|
| 1  | 114.09  | 57.55           |         |                  |                |                  | L    |         |                 |         |                  |                |                  | 11 |
| 2  | 243.13  | 122.07          |         |                  | 225.12         | 113.07           | E    | 1280.64 | 640.82          | 1263.61 | 632.31           | 1262.63        | 631.82           | 10 |
| 3  | 471.24  | 236.13          | 454.22  | 227.61           | 453.23         | 227.12           | K    | 1151.59 | 576.30          | 1134.57 | 567.79           | 1133.58        | 567.30           | 9  |
| 4  | 542.28  | 271.64          | 525.26  | 263.13           | 524.27         | 262.64           | A    | 923.48  | 462.25          | 906.46  | 453.73           | 905.47         | 453.24           | 8  |
| 5  | 613.32  | 307.16          | 596.29  | 298.65           | 595.31         | 298.16           | A    | 852.45  | 426.73          | 835.42  | 418.21           | 834.44         | 417.72           | 7  |
| 6  | 714.37  | 357.69          | 697.34  | 349.17           | 696.36         | 348.68           | T    | 781.41  | 391.21          | 764.38  | 382.69           | 763.40         | 382.20           | 6  |
| 7  | 877.43  | 439.22          | 860.40  | 430.71           | 859.42         | 430.21           | Y    | 680.36  | 340.68          | 663.33  | 332.17           | 662.35         | 331.68           | 5  |
| 8  | 1006.47 | 503.74          | 989.45  | 495.23           | 988.46         | 494.73           | E    | 517.30  | 259.15          | 500.27  | 250.64           | 499.29         | 250.15           | 4  |
| 9  | 1134.53 | 567.77          | 1117.50 | 559.26           | 1116.52        | 558.76           | Q    | 388.26  | 194.63          | 371.23  | 186.12           |                |                  | 3  |
| 10 | 1247.62 | 624.31          | 1230.59 | 615.80           | 1229.60        | 615.31           | I    | 260.20  | 130.60          | 243.17  | 122.09           |                |                  | 2  |
| 11 |         |                 |         |                  |                |                  | K    | 147.11  | 74.06           | 130.09  | 65.55            |                |                  | 1  |

# glyceraldehyde-3-phosphate dehydrogenase A K257

## AATYEQI<sup>Succ</sup>KA<sup>AVK</sup>

MS/MS Fragmentation of **AATYEQIKA<sup>AVK</sup>**

Found in [gi170081435](#), glyceraldehyde-3-phosphate dehydrogenase A [Escherichia coli

Match to Query 3316: 1391.735994 from(696.875273,2+)

From data file zzh64.dta

Click mouse within plot area to zoom in by factor of two about that point

Or,   to  Da

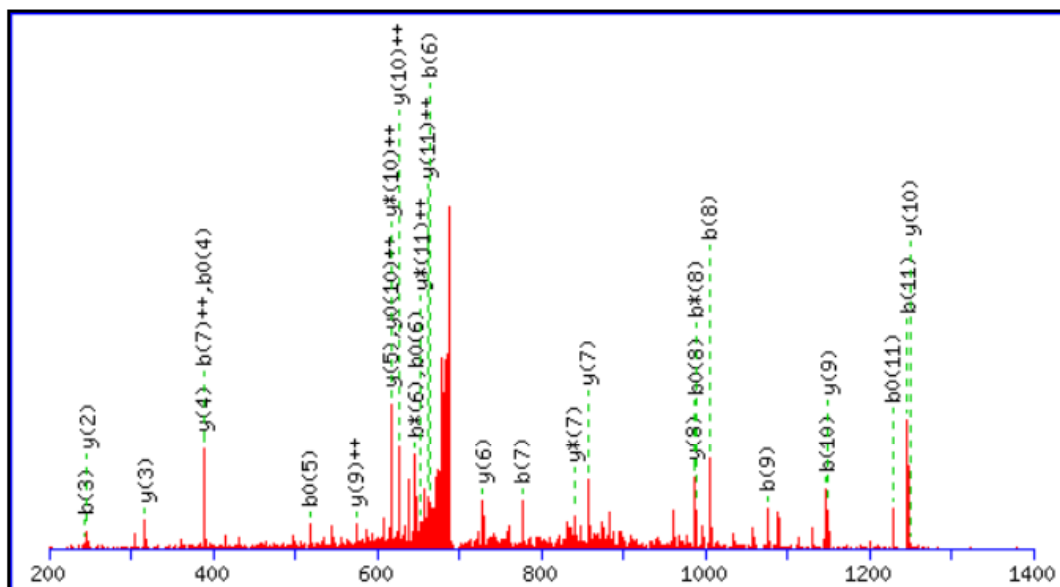

Monoisotopic mass of neutral peptide  $M_r(\text{calc})$ : 1391.73

Variable modifications:

K8 : Succinyl (K)

Ions Score: 45 Expect: 0.0018

| #  | b       | b <sup>++</sup> | b*      | b <sup>*++</sup> | b <sup>0</sup> | b <sup>0++</sup> | Seq. | y       | y <sup>++</sup> | y*      | y <sup>*++</sup> | y <sup>0</sup> | y <sup>0++</sup> | #  |
|----|---------|-----------------|---------|------------------|----------------|------------------|------|---------|-----------------|---------|------------------|----------------|------------------|----|
| 1  | 72.04   | 36.53           |         |                  |                |                  | A    |         |                 |         |                  |                |                  | 12 |
| 2  | 143.08  | 72.04           |         |                  |                |                  | A    | 1321.70 | 661.35          | 1304.67 | 652.84           | 1303.69        | 652.35           | 11 |
| 3  | 244.13  | 122.57          |         |                  | 226.12         | 113.56           | T    | 1250.66 | 625.83          | 1233.64 | 617.32           | 1232.65        | 616.83           | 10 |
| 4  | 407.19  | 204.10          |         |                  | 389.18         | 195.09           | Y    | 1149.62 | 575.31          | 1132.59 | 566.80           | 1131.60        | 566.31           | 9  |
| 5  | 536.24  | 268.62          |         |                  | 518.22         | 259.62           | E    | 986.55  | 493.78          | 969.53  | 485.27           | 968.54         | 484.77           | 8  |
| 6  | 664.29  | 332.65          | 647.27  | 324.14           | 646.28         | 323.65           | Q    | 857.51  | 429.26          | 840.48  | 420.74           |                |                  | 7  |
| 7  | 777.38  | 389.19          | 760.35  | 380.68           | 759.37         | 380.19           | I    | 729.45  | 365.23          | 712.42  | 356.72           |                |                  | 6  |
| 8  | 1005.49 | 503.25          | 988.46  | 494.73           | 987.48         | 494.24           | K    | 616.37  | 308.69          | 599.34  | 300.17           |                |                  | 5  |
| 9  | 1076.53 | 538.77          | 1059.50 | 530.25           | 1058.52        | 529.76           | A    | 388.26  | 194.63          | 371.23  | 186.12           |                |                  | 4  |
| 10 | 1147.56 | 574.29          | 1130.54 | 565.77           | 1129.55        | 565.28           | A    | 317.22  | 159.11          | 300.19  | 150.60           |                |                  | 3  |
| 11 | 1246.63 | 623.82          | 1229.60 | 615.31           | 1228.62        | 614.81           | V    | 246.18  | 123.59          | 229.15  | 115.08           |                |                  | 2  |
| 12 |         |                 |         |                  |                |                  | K    | 147.11  | 74.06           | 130.09  | 65.55            |                |                  | 1  |



# glyceraldehyde-3-phosphate dehydrogenase A K261

## AAV<sup>Succ</sup>KAAAEGEMK

MS/MS Fragmentation of **AAVKAAAEGEMK**

Found in **gi|170081435**, glyceraldehyde-3-phosphate dehydrogenase A [Escherichia coli str.

Match to Query 5468: 1290.620034 from(646.317293,2+)

From data file zzh63.dta

Click mouse within plot area to zoom in by factor of two about that point

Or,   to  Da

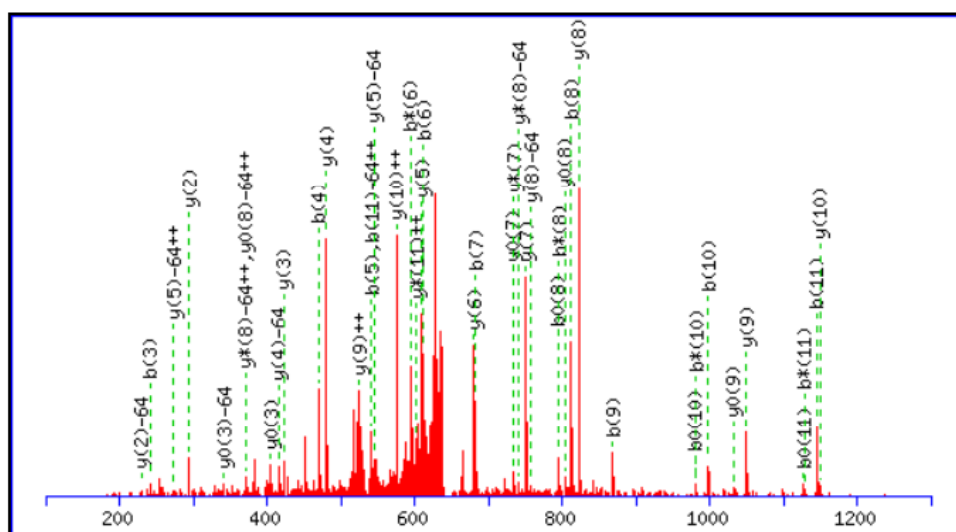

Monoisotopic mass of neutral peptide  $M_r(\text{calc})$ : 1290.61

Variable modifications:

K4 : Succinyl (K)

M11 : Oxidation (M), with neutral losses 0.00 (shown in table), 64.00

Ions Score: 45 Expect: 0.0023

| #  | b              | b <sup>++</sup> | b*             | b <sup>*++</sup> | b <sup>0</sup> | b <sup>0++</sup> | Seq. | y              | y <sup>++</sup> | y*            | y <sup>*++</sup> | y <sup>0</sup> | y <sup>0++</sup> | #  |
|----|----------------|-----------------|----------------|------------------|----------------|------------------|------|----------------|-----------------|---------------|------------------|----------------|------------------|----|
| 1  | 72.04          | 36.53           |                |                  |                |                  | A    |                |                 |               |                  |                |                  | 12 |
| 2  | 143.08         | 72.04           |                |                  |                |                  | A    | 1220.58        | 610.79          | 1203.56       | <b>602.28</b>    | 1202.57        | 601.79           | 11 |
| 3  | <b>242.15</b>  | 121.58          |                |                  |                |                  | V    | <b>1149.55</b> | <b>575.28</b>   | 1132.52       | 566.76           | 1131.54        | 566.27           | 10 |
| 4  | <b>470.26</b>  | 235.63          | 453.23         | 227.12           |                |                  | K    | <b>1050.48</b> | <b>525.74</b>   | 1033.45       | 517.23           | <b>1032.47</b> | 516.74           | 9  |
| 5  | <b>541.30</b>  | 271.15          | 524.27         | 262.64           |                |                  | A    | <b>822.37</b>  | 411.69          | 805.34        | 403.17           | <b>804.36</b>  | 402.68           | 8  |
| 6  | <b>612.34</b>  | 306.67          | <b>595.31</b>  | 298.16           |                |                  | A    | <b>751.33</b>  | 376.17          | <b>734.30</b> | 367.65           | <b>733.32</b>  | 367.16           | 7  |
| 7  | <b>683.37</b>  | 342.19          | 666.35         | 333.68           |                |                  | A    | <b>680.29</b>  | 340.65          | 663.27        | 332.14           | 662.28         | 331.64           | 6  |
| 8  | <b>812.41</b>  | 406.71          | <b>795.39</b>  | 398.20           | <b>794.40</b>  | 397.71           | E    | <b>609.25</b>  | 305.13          | 592.23        | 296.62           | 591.24         | 296.13           | 5  |
| 9  | <b>869.44</b>  | 435.22          | 852.41         | 426.71           | 851.43         | 426.22           | G    | <b>480.21</b>  | 240.61          | 463.19        | 232.10           | 462.20         | 231.60           | 4  |
| 10 | <b>998.48</b>  | 499.74          | <b>981.45</b>  | 491.23           | <b>980.47</b>  | 490.74           | E    | <b>423.19</b>  | 212.10          | 406.16        | 203.59           | <b>405.18</b>  | 203.09           | 3  |
| 11 | <b>1145.51</b> | 573.26          | <b>1128.49</b> | 564.75           | <b>1127.50</b> | 564.26           | M    | <b>294.15</b>  | 147.58          | 277.12        | 139.06           |                |                  | 2  |
| 12 |                |                 |                |                  |                |                  | K    | 147.11         | 74.06           | 130.09        | 65.55            |                |                  | 1  |

# glyceraldehyde-3-phosphate dehydrogenase A K331

## VLDLIAHIS<sup>SuccK</sup>

MS/MS Fragmentation of **VLDLIAHISK**

Found in **gi|170081435**, glyceraldehyde-3-phosphate dehydrogenase A [Escherichia coli

Match to Query 2410: 1207.686074 from(604.850313,2+)

From data file zzh64.dta

Click mouse within plot area to zoom in by factor of two about that point

Or,   to  Da

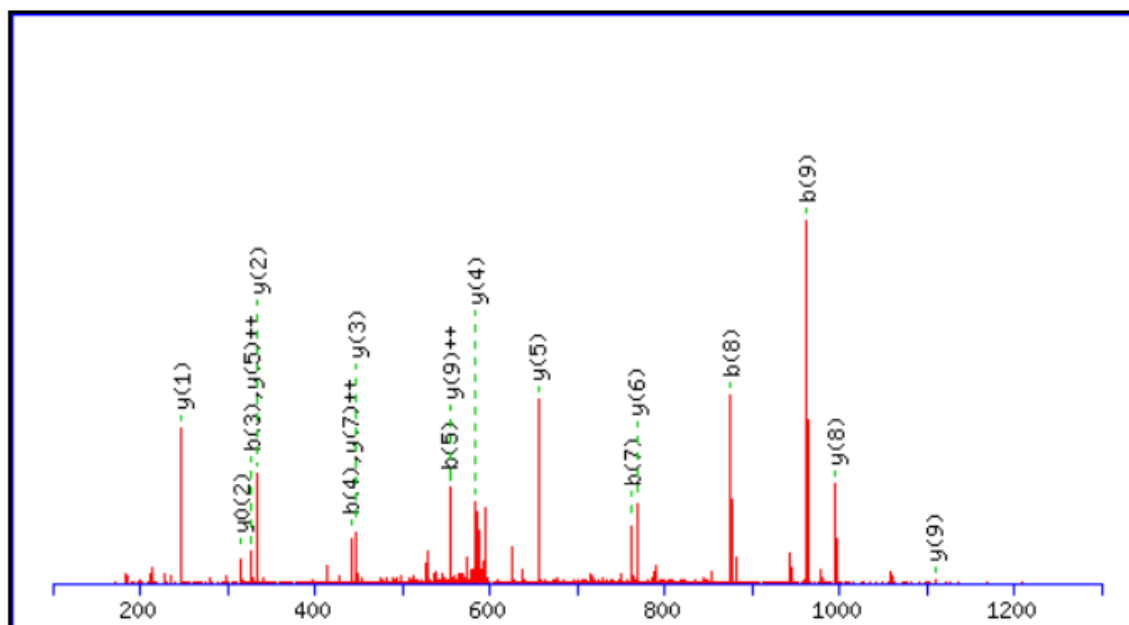

Monoisotopic mass of neutral peptide  $M_r(\text{calc})$ : 1207.68

Variable modifications:

K10 : Succinyl (K)

Ions Score: 70 Expect: 4.9e-006

| #  | b      | b <sup>++</sup> | b <sup>0</sup> | b <sup>0++</sup> | Seq. | y       | y <sup>++</sup> | y*      | y <sup>*++</sup> | y <sup>0</sup> | y <sup>0++</sup> | #  |
|----|--------|-----------------|----------------|------------------|------|---------|-----------------|---------|------------------|----------------|------------------|----|
| 1  | 100.08 | 50.54           |                |                  | V    |         |                 |         |                  |                |                  | 10 |
| 2  | 213.16 | 107.08          |                |                  | L    | 1109.62 | 555.31          | 1092.59 | 546.80           | 1091.61        | 546.31           | 9  |
| 3  | 328.19 | 164.60          | 310.18         | 155.59           | D    | 996.54  | 498.77          | 979.51  | 490.26           | 978.53         | 489.77           | 8  |
| 4  | 441.27 | 221.14          | 423.26         | 212.13           | L    | 881.51  | 441.26          | 864.48  | 432.74           | 863.50         | 432.25           | 7  |
| 5  | 554.35 | 277.68          | 536.34         | 268.68           | I    | 768.43  | 384.72          | 751.40  | 376.20           | 750.41         | 375.71           | 6  |
| 6  | 625.39 | 313.20          | 607.38         | 304.19           | A    | 655.34  | 328.17          | 638.31  | 319.66           | 637.33         | 319.17           | 5  |
| 7  | 762.45 | 381.73          | 744.44         | 372.72           | H    | 584.30  | 292.66          | 567.28  | 284.14           | 566.29         | 283.65           | 4  |
| 8  | 875.53 | 438.27          | 857.52         | 429.27           | I    | 447.24  | 224.13          | 430.22  | 215.61           | 429.23         | 215.12           | 3  |
| 9  | 962.57 | 481.79          | 944.56         | 472.78           | S    | 334.16  | 167.58          | 317.13  | 159.07           | 316.15         | 158.58           | 2  |
| 10 |        |                 |                |                  | K    | 247.13  | 124.07          | 230.10  | 115.55           |                |                  | 1  |

# fructose-bisphosphate aldolase, class II K9

## IFDFV<sup>Succ</sup>KPGVITGDDVQK

MS/MS Fragmentation of **IFDFVKPGVITGDDVQK**

Found in [gij170082482](#), fructose-bisphosphate aldolase, class II [Escherichia coli str. F

Match to Query 8029: 1978.020914 from(990.017733,2+)

From data file zzh61.dta

Click mouse within plot area to zoom in by factor of two about that point

Or,   to  Da

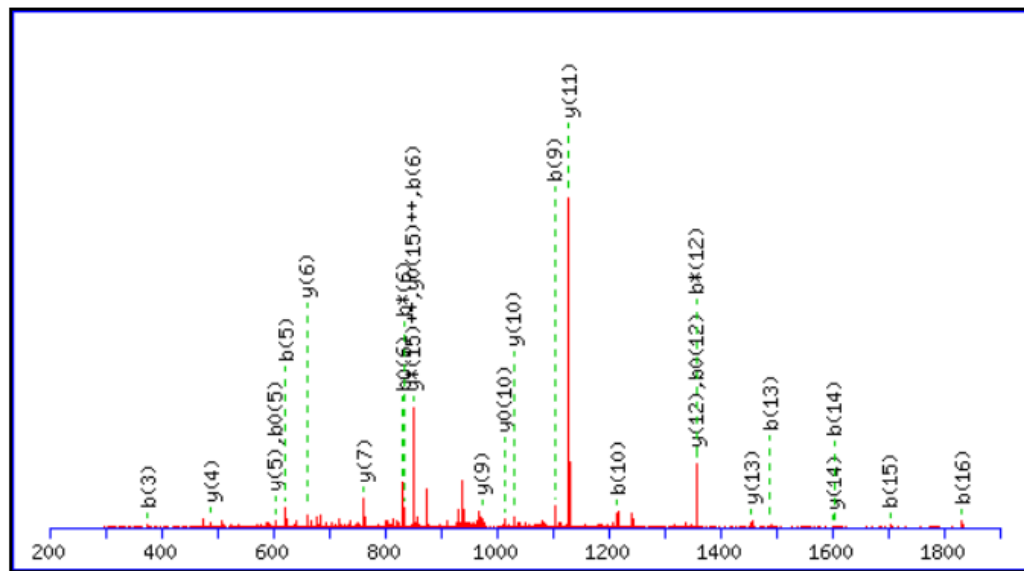

### Precursor Ion

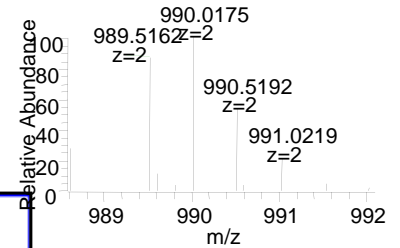

Monoisotopic mass of neutral peptide  $M_r(\text{calc})$ : 1977.01

Variable modifications:

K6 : Succinyl (K)

Ions Score: 52 Expect: 0.00048

| #  | b              | b <sup>++</sup> | b*             | b <sup>*++</sup> | b <sup>0</sup> | b <sup>0++</sup> | Seq. | y              | y <sup>++</sup> | y*      | y <sup>*++</sup> | y <sup>0</sup> | y <sup>0++</sup> | #  |
|----|----------------|-----------------|----------------|------------------|----------------|------------------|------|----------------|-----------------|---------|------------------|----------------|------------------|----|
| 1  | 114.09         | 57.55           |                |                  |                |                  | I    |                |                 |         |                  |                |                  | 17 |
| 2  | 261.16         | 131.08          |                |                  |                |                  | F    | 1864.93        | 932.97          | 1847.91 | 924.46           | 1846.92        | 923.96           | 16 |
| 3  | <b>376.19</b>  | 188.60          |                |                  | 358.18         | 179.59           | D    | 1717.86        | 859.44          | 1700.84 | <b>850.92</b>    | 1699.85        | <b>850.43</b>    | 15 |
| 4  | 523.26         | 262.13          |                |                  | 505.24         | 253.13           | F    | <b>1602.84</b> | 801.92          | 1585.81 | 793.41           | 1584.83        | 792.92           | 14 |
| 5  | <b>622.32</b>  | 311.67          |                |                  | <b>604.31</b>  | 302.66           | V    | <b>1455.77</b> | 728.39          | 1438.74 | 719.87           | 1437.76        | 719.38           | 13 |
| 6  | <b>850.43</b>  | 425.72          | <b>833.41</b>  | 417.21           | <b>832.42</b>  | 416.72           | K    | <b>1356.70</b> | 678.85          | 1339.67 | 670.34           | 1338.69        | 669.85           | 12 |
| 7  | 947.49         | 474.25          | 930.46         | 465.73           | 929.48         | 465.24           | P    | <b>1128.59</b> | 564.80          | 1111.56 | 556.29           | 1110.58        | 555.79           | 11 |
| 8  | 1004.51        | 502.76          | 987.48         | 494.24           | 986.50         | 493.75           | G    | <b>1031.54</b> | 516.27          | 1014.51 | 507.76           | <b>1013.53</b> | 507.27           | 10 |
| 9  | <b>1103.58</b> | 552.29          | 1086.55        | 543.78           | 1085.57        | 543.29           | V    | <b>974.52</b>  | 487.76          | 957.49  | 479.25           | 956.50         | 478.76           | 9  |
| 10 | <b>1216.66</b> | 608.83          | 1199.63        | 600.32           | 1198.65        | 599.83           | I    | 875.45         | 438.23          | 858.42  | 429.71           | 857.44         | 429.22           | 8  |
| 11 | 1317.71        | 659.36          | 1300.68        | 650.84           | 1299.70        | 650.35           | T    | <b>762.36</b>  | 381.69          | 745.34  | 373.17           | 744.35         | 372.68           | 7  |
| 12 | 1374.73        | 687.87          | <b>1357.70</b> | 679.36           | <b>1356.72</b> | 678.86           | G    | <b>661.32</b>  | 331.16          | 644.29  | 322.65           | 643.30         | 322.16           | 6  |
| 13 | <b>1489.76</b> | 745.38          | 1472.73        | 736.87           | 1471.75        | 736.38           | D    | <b>604.29</b>  | 302.65          | 587.27  | 294.14           | 586.28         | 293.65           | 5  |
| 14 | <b>1604.78</b> | 802.90          | 1587.76        | 794.38           | 1586.77        | 793.89           | D    | <b>489.27</b>  | 245.14          | 472.24  | 236.62           | 471.26         | 236.13           | 4  |
| 15 | <b>1703.85</b> | 852.43          | 1686.83        | 843.92           | 1685.84        | 843.42           | V    | 374.24         | 187.62          | 357.21  | 179.11           |                |                  | 3  |
| 16 | <b>1831.91</b> | 916.46          | 1814.88        | 907.95           | 1813.90        | 907.45           | Q    | 275.17         | 138.09          | 258.14  | 129.58           |                |                  | 2  |
| 17 |                |                 |                |                  |                |                  | K    | 147.11         | 74.06           | 130.09  | 65.55            |                |                  | 1  |

# fructose-bisphosphate aldolase, class II

K72

## APVIVQFSNGGASFIAG<sup>Succ</sup>KGVK

MS/MS Fragmentation of **APVIVQFSNGGASFIAGKGVK**

Found in **gi170082482**, fructose-bisphosphate aldolase, class II [Escherichia coli str. K

Match to Query 8464: 2147.155434 from(1074.584993,2+)

From data file zzh61.dta

Click mouse within plot area to zoom in by factor of two about that point

Or,   to  Da

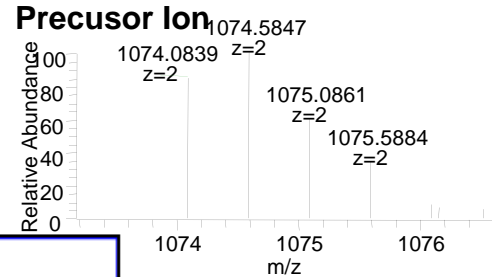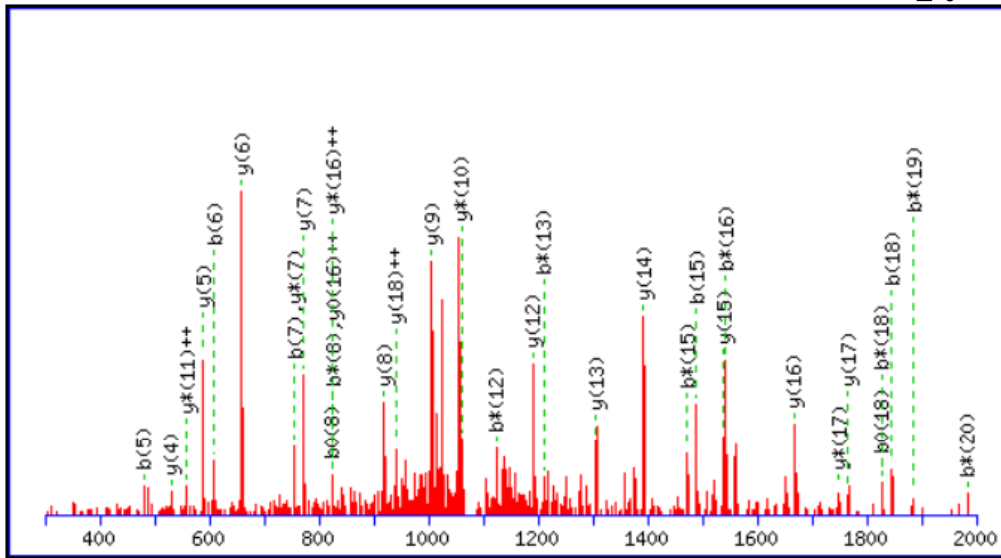

Monoisotopic mass of neutral peptide Mr(calc): 2146.14

Variable modifications:

K18 : Succinyl (K)

Ions Score: 50 Fragment: 0 000051

| #  | b       | b <sup>++</sup> | b <sup>*</sup> | b <sup>*++</sup> | b <sup>0</sup> | b <sup>0++</sup> | Seq. | y       | y <sup>++</sup> | y <sup>*</sup> | y <sup>*++</sup> | y <sup>0</sup> | y <sup>0++</sup> | #  |
|----|---------|-----------------|----------------|------------------|----------------|------------------|------|---------|-----------------|----------------|------------------|----------------|------------------|----|
| 1  | 72.04   | 36.53           |                |                  |                |                  | A    |         |                 |                |                  |                |                  | 21 |
| 2  | 169.10  | 85.05           |                |                  |                |                  | P    | 2076.11 | 1038.56         | 2059.09        | 1030.05          | 2058.10        | 1029.55          | 20 |
| 3  | 268.17  | 134.59          |                |                  |                |                  | V    | 1979.06 | 990.03          | 1962.03        | 981.52           | 1961.05        | 981.03           | 19 |
| 4  | 381.25  | 191.13          |                |                  |                |                  | I    | 1879.99 | 940.50          | 1862.96        | 931.99           | 1861.98        | 931.49           | 18 |
| 5  | 480.32  | 240.66          |                |                  |                |                  | V    | 1766.91 | 883.96          | 1749.88        | 875.44           | 1748.90        | 874.95           | 17 |
| 6  | 608.38  | 304.69          | 591.35         | 296.18           |                |                  | Q    | 1667.84 | 834.42          | 1650.81        | 825.91           | 1649.83        | 825.42           | 16 |
| 7  | 755.45  | 378.23          | 738.42         | 369.71           |                |                  | F    | 1539.78 | 770.39          | 1522.75        | 761.88           | 1521.77        | 761.39           | 15 |
| 8  | 842.48  | 421.74          | 825.45         | 413.23           | 824.47         | 412.74           | S    | 1392.71 | 696.86          | 1375.69        | 688.35           | 1374.70        | 687.85           | 14 |
| 9  | 956.52  | 478.76          | 939.49         | 470.25           | 938.51         | 469.76           | N    | 1305.68 | 653.34          | 1288.65        | 644.83           | 1287.67        | 644.34           | 13 |
| 10 | 1013.54 | 507.27          | 996.51         | 498.76           | 995.53         | 498.27           | G    | 1191.64 | 596.32          | 1174.61        | 587.81           | 1173.63        | 587.32           | 12 |
| 11 | 1070.56 | 535.79          | 1053.54        | 527.27           | 1052.55        | 526.78           | G    | 1134.62 | 567.81          | 1117.59        | 559.30           | 1116.60        | 558.81           | 11 |
| 12 | 1141.60 | 571.30          | 1124.57        | 562.79           | 1123.59        | 562.30           | A    | 1077.59 | 539.30          | 1060.57        | 530.79           | 1059.58        | 530.30           | 10 |
| 13 | 1228.63 | 614.82          | 1211.61        | 606.31           | 1210.62        | 605.81           | S    | 1006.56 | 503.78          | 989.53         | 495.27           | 988.55         | 494.78           | 9  |
| 14 | 1375.70 | 688.35          | 1358.67        | 679.84           | 1357.69        | 679.35           | F    | 919.52  | 460.27          | 902.50         | 451.75           |                |                  | 8  |
| 15 | 1488.78 | 744.90          | 1471.76        | 736.38           | 1470.77        | 735.89           | I    | 772.46  | 386.73          | 755.43         | 378.22           |                |                  | 7  |
| 16 | 1559.82 | 780.41          | 1542.80        | 771.90           | 1541.81        | 771.41           | A    | 659.37  | 330.19          | 642.35         | 321.68           |                |                  | 6  |
| 17 | 1616.84 | 808.93          | 1599.82        | 800.41           | 1598.83        | 799.92           | G    | 588.34  | 294.67          | 571.31         | 286.16           |                |                  | 5  |
| 18 | 1844.95 | 922.98          | 1827.93        | 914.47           | 1826.94        | 913.98           | K    | 531.31  | 266.16          | 514.29         | 257.65           |                |                  | 4  |
| 19 | 1901.98 | 951.49          | 1884.95        | 942.98           | 1883.96        | 942.49           | G    | 303.20  | 152.10          | 286.18         | 143.59           |                |                  | 3  |
| 20 | 2001.04 | 1001.03         | 1984.02        | 992.51           | 1983.03        | 992.02           | V    | 246.18  | 123.59          | 229.15         | 115.08           |                |                  | 2  |
| 21 |         |                 |                |                  |                |                  | K    | 147.11  | 74.06           | 130.09         | 65.55            |                |                  | 1  |

# fructose-bisphosphate aldolase, class II

K115

## SuccKLLPWIDGLLDAGEK

MS/MS Fragmentation of **KLLPWIDGLLDAGEK**

Found in **gi170082482**, fructose-bisphosphate aldolase, class II [Escherichia coli str. K

Match to Query 7183: 1766.953404 from(884.483978,2+)

From data file zzh61.dta

Click mouse within plot area to zoom in by factor of two about that point

Or,   to  Da

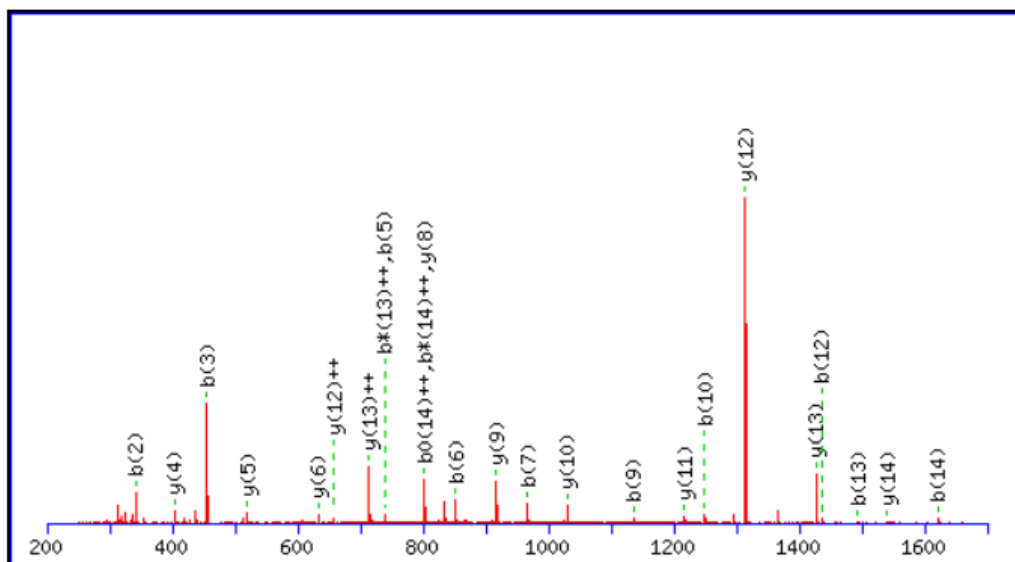

Monoisotopic mass of neutral peptide Mr(calc) : 1766.95

Variable modifications:

K1 : Succinyl (K)

| #  | b       | b <sup>++</sup> | b*      | b <sup>*++</sup> | b <sup>0</sup> | b <sup>0++</sup> | Seq. | y       | y <sup>++</sup> | y*      | y <sup>*++</sup> | y <sup>0</sup> | y <sup>0++</sup> | #  |
|----|---------|-----------------|---------|------------------|----------------|------------------|------|---------|-----------------|---------|------------------|----------------|------------------|----|
| 1  | 229.12  | 115.06          | 212.09  | 106.55           |                |                  | K    |         |                 |         |                  |                |                  | 15 |
| 2  | 342.20  | 171.60          | 325.18  | 163.09           |                |                  | L    | 1539.84 | 770.42          | 1522.82 | 761.91           | 1521.83        | 761.42           | 14 |
| 3  | 455.29  | 228.15          | 438.26  | 219.63           |                |                  | L    | 1426.76 | 713.88          | 1409.73 | 705.37           | 1408.75        | 704.88           | 13 |
| 4  | 552.34  | 276.67          | 535.31  | 268.16           |                |                  | P    | 1313.67 | 657.34          | 1296.65 | 648.83           | 1295.66        | 648.34           | 12 |
| 5  | 738.42  | 369.71          | 721.39  | 361.20           |                |                  | W    | 1216.62 | 608.81          | 1199.59 | 600.30           | 1198.61        | 599.81           | 11 |
| 6  | 851.50  | 426.25          | 834.48  | 417.74           |                |                  | I    | 1030.54 | 515.77          | 1013.51 | 507.26           | 1012.53        | 506.77           | 10 |
| 7  | 966.53  | 483.77          | 949.50  | 475.26           | 948.52         | 474.76           | D    | 917.46  | 459.23          | 900.43  | 450.72           | 899.45         | 450.23           | 9  |
| 8  | 1023.55 | 512.28          | 1006.52 | 503.77           | 1005.54        | 503.27           | G    | 802.43  | 401.72          | 785.40  | 393.21           | 784.42         | 392.71           | 8  |
| 9  | 1136.63 | 568.82          | 1119.61 | 560.31           | 1118.62        | 559.82           | L    | 745.41  | 373.21          | 728.38  | 364.69           | 727.40         | 364.20           | 7  |
| 10 | 1249.72 | 625.36          | 1232.69 | 616.85           | 1231.71        | 616.36           | L    | 632.32  | 316.67          | 615.30  | 308.15           | 614.31         | 307.66           | 6  |
| 11 | 1364.75 | 682.88          | 1347.72 | 674.36           | 1346.74        | 673.87           | D    | 519.24  | 260.12          | 502.21  | 251.61           | 501.23         | 251.12           | 5  |
| 12 | 1435.78 | 718.40          | 1418.76 | 709.88           | 1417.77        | 709.39           | A    | 404.21  | 202.61          | 387.19  | 194.10           | 386.20         | 193.61           | 4  |
| 13 | 1492.80 | 746.91          | 1475.78 | 738.39           | 1474.79        | 737.90           | G    | 333.18  | 167.09          | 316.15  | 158.58           | 315.17         | 158.09           | 3  |
| 14 | 1621.85 | 811.43          | 1604.82 | 802.91           | 1603.84        | 802.42           | E    | 276.16  | 138.58          | 259.13  | 130.07           | 258.14         | 129.58           | 2  |
| 15 |         |                 |         |                  |                |                  | K    | 147.11  | 74.06           | 130.09  | 65.55            |                |                  | 1  |

# fructose-bisphosphate aldolase, class II K231

## FTIAASFGNVHGVY<sup>Succ</sup>KPGNVVLTPTILR

MS/MS Fragmentation of **FTIAASFGNVHGVYKPGNVVLTPTILR**

Found in [gij170082482](#), fructose-bisphosphate aldolase, class II [Escherichia coli str. F

Match to Query 9890: 2971.616781 from(991.546203,3+)

From data file zzh61.dta

Click mouse within plot area to zoom in by factor of two about that point

Or,   to  Da

### Precursor ion

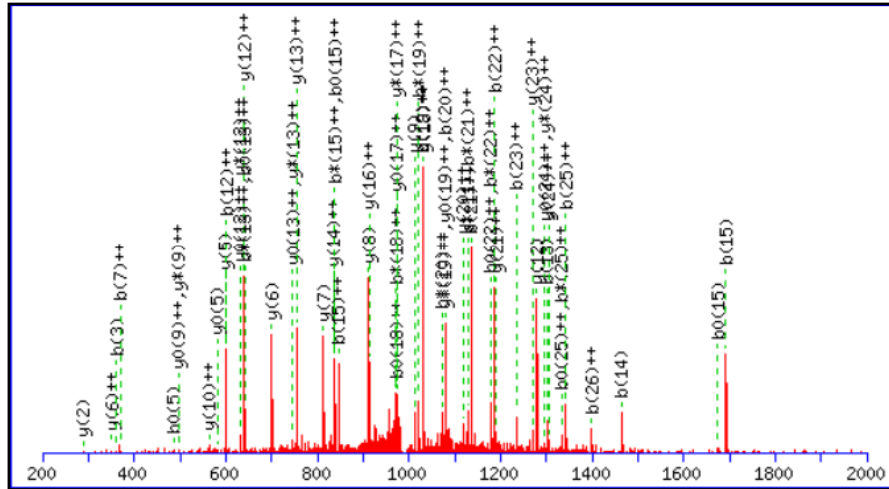

zzh61 #7655 RT: 61.79 AV: 1 NL: 7.23E4

F: FTMS + c NSI Full ms[350.00-2000.00]

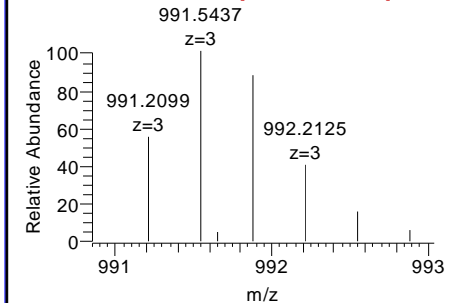

Monoisotopic mass of neutral peptide Mr(calc): 2970.60

Variable modifications:

K15 : Succinyl (K)

Ions Score: 45 Expect: 0.0038

| #  | b              | b <sup>++</sup> | b*             | b <sup>*++</sup> | b <sup>0</sup> | b <sup>0++</sup> | Seq. | y              | y <sup>++</sup> | y*      | y <sup>*++</sup> | y <sup>0</sup> | y <sup>0++</sup> | #  |
|----|----------------|-----------------|----------------|------------------|----------------|------------------|------|----------------|-----------------|---------|------------------|----------------|------------------|----|
| 1  | 148.08         | 74.54           |                |                  |                |                  | F    |                |                 |         |                  |                |                  | 27 |
| 2  | 249.12         | 125.07          |                |                  | 231.11         | 116.06           | T    | 2824.54        | 1412.77         | 2807.51 | 1404.26          | 2806.52        | 1403.77          | 26 |
| 3  | <b>362.21</b>  | 181.61          |                |                  | 344.20         | 172.60           | I    | 2723.49        | 1362.25         | 2706.46 | 1353.73          | 2705.48        | 1353.24          | 25 |
| 4  | 433.24         | 217.13          |                |                  | 415.23         | 208.12           | A    | 2610.40        | <b>1305.71</b>  | 2593.38 | <b>1297.19</b>   | 2592.39        | <b>1296.70</b>   | 24 |
| 5  | 504.28         | 252.64          |                |                  | <b>486.27</b>  | 243.64           | A    | 2539.37        | <b>1270.19</b>  | 2522.34 | 1261.67          | 2521.36        | 1261.18          | 23 |
| 6  | 591.31         | 296.16          |                |                  | 573.30         | 287.16           | S    | 2468.33        | 1234.67         | 2451.30 | 1226.16          | 2450.32        | 1225.66          | 22 |
| 7  | 738.38         | <b>369.69</b>   |                |                  | 720.37         | 360.69           | F    | 2381.30        | <b>1191.15</b>  | 2364.27 | 1182.64          | 2363.29        | 1182.15          | 21 |
| 8  | 795.40         | 398.21          |                |                  | 777.39         | 389.20           | G    | 2234.23        | <b>1117.62</b>  | 2217.20 | 1109.10          | 2216.22        | 1108.61          | 20 |
| 9  | 909.45         | 455.23          | 892.42         | 446.71           | 891.44         | 446.22           | N    | 2177.21        | 1089.11         | 2160.18 | <b>1080.59</b>   | 2159.20        | <b>1080.10</b>   | 19 |
| 10 | 1008.51        | 504.76          | 991.49         | 496.25           | 990.50         | 495.76           | V    | 2063.16        | <b>1032.09</b>  | 2046.14 | 1023.57          | 2045.15        | 1023.08          | 18 |
| 11 | 1145.57        | 573.29          | <b>1128.55</b> | 564.78           | 1127.56        | 564.29           | H    | 1964.10        | 982.55          | 1947.07 | <b>974.04</b>    | 1946.09        | <b>973.55</b>    | 17 |
| 12 | 1202.60        | <b>601.80</b>   | 1185.57        | 593.29           | 1184.58        | 592.80           | G    | 1827.04        | <b>914.02</b>   | 1810.01 | 905.51           | 1809.03        | 905.02           | 16 |
| 13 | <b>1301.66</b> | 651.34          | 1284.64        | <b>642.82</b>    | 1283.65        | <b>642.33</b>    | V    | 1770.02        | 885.51          | 1752.99 | 877.00           | 1752.01        | 876.51           | 15 |
| 14 | <b>1464.73</b> | 732.87          | 1447.70        | 724.35           | 1446.72        | 723.86           | Y    | 1670.95        | <b>835.98</b>   | 1653.92 | 827.46           | 1652.94        | 826.97           | 14 |
| 15 | <b>1692.84</b> | <b>846.92</b>   | 1675.81        | <b>838.41</b>    | <b>1674.83</b> | <b>837.92</b>    | K    | 1507.88        | <b>754.45</b>   | 1490.86 | <b>745.93</b>    | 1489.87        | <b>745.44</b>    | 13 |
| 16 | 1789.89        | 895.45          | 1772.86        | 886.94           | 1771.88        | 886.44           | P    | <b>1279.77</b> | <b>640.39</b>   | 1262.75 | <b>631.88</b>    | 1261.76        | <b>631.38</b>    | 12 |
| 17 | 1846.91        | 923.96          | 1829.89        | 915.45           | 1828.90        | 914.95           | G    | 1182.72        | 591.86          | 1165.69 | 583.35           | 1164.71        | 582.86           | 11 |
| 18 | 1960.96        | 980.98          | 1943.93        | <b>972.47</b>    | 1942.94        | <b>971.98</b>    | N    | 1125.70        | <b>563.35</b>   | 1108.67 | 554.84           | 1107.69        | 554.35           | 10 |
| 19 | 2060.02        | <b>1030.52</b>  | 2043.00        | <b>1022.00</b>   | 2042.01        | 1021.51          | V    | <b>1011.66</b> | 506.33          | 994.63  | <b>497.82</b>    | 993.65         | <b>497.33</b>    | 9  |
| 20 | 2159.09        | <b>1080.05</b>  | 2142.07        | <b>1071.54</b>   | 2141.08        | 1071.04          | V    | <b>912.59</b>  | 456.80          | 895.56  | 448.28           | 894.58         | 447.79           | 8  |
| 21 | 2272.18        | <b>1136.59</b>  | 2255.15        | <b>1128.08</b>   | 2254.17        | 1127.59          | L    | <b>813.52</b>  | 407.26          | 796.49  | 398.75           | 795.51         | 398.26           | 7  |
| 22 | 2373.22        | <b>1187.12</b>  | 2356.20        | <b>1178.60</b>   | 2355.21        | <b>1178.11</b>   | T    | <b>700.44</b>  | <b>350.72</b>   | 683.41  | 342.21           | 682.42         | 341.72           | 6  |
| 23 | 2470.28        | <b>1235.64</b>  | 2453.25        | 1227.13          | 2452.27        | 1226.64          | P    | <b>599.39</b>  | 300.20          | 582.36  | 291.68           | <b>581.38</b>  | 291.19           | 5  |
| 24 | 2571.32        | 1286.17         | 2554.30        | 1277.65          | 2553.31        | 1277.16          | T    | 502.33         | 251.67          | 485.31  | 243.16           | 484.32         | 242.67           | 4  |
| 25 | 2684.41        | <b>1342.71</b>  | 2667.38        | <b>1334.19</b>   | 2666.40        | <b>1333.70</b>   | I    | 401.29         | 201.15          | 384.26  | 192.63           |                |                  | 3  |
| 26 | 2797.49        | <b>1399.25</b>  | 2780.47        | 1390.74          | 2779.48        | 1390.24          | L    | <b>288.20</b>  | 144.61          | 271.18  | 136.09           |                |                  | 2  |
| 27 |                |                 |                |                  |                |                  | R    | 175.12         | 88.06           | 158.09  | 79.55            |                |                  | 1  |

# fructose-bisphosphate aldolase, class II K251

## DSQEYVS<sup>Succ</sup>KK

MS/MS Fragmentation of **DSQEYVSKK**

Found in [gi|170082482](#), fructose-bisphosphate aldolase, class II [Escherichia coli str. K

Match to Query 3902: 1182.546244 from(592.280398,2+)

From data file zzh61.dta

Click mouse within plot area to zoom in by factor of two about that point

Or,   to  Da

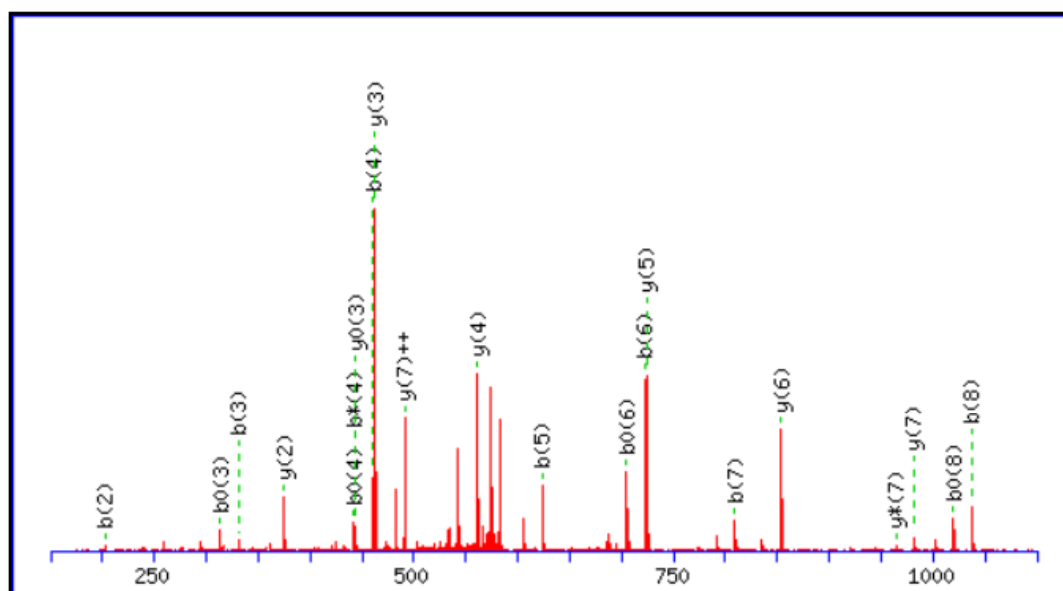

Monoisotopic mass of neutral peptide  $M_r(\text{calc})$ : 1182.54

Variable modifications:

K8 : Succinyl (K)

Ions Score: 45 Expect: 0.0016

| # | b       | b <sup>++</sup> | b*      | b <sup>*++</sup> | b <sup>0</sup> | b <sup>0++</sup> | Seq. | y       | y <sup>++</sup> | y*      | y <sup>*++</sup> | y <sup>0</sup> | y <sup>0++</sup> | # |
|---|---------|-----------------|---------|------------------|----------------|------------------|------|---------|-----------------|---------|------------------|----------------|------------------|---|
| 1 | 116.03  | 58.52           |         |                  | 98.02          | 49.52            | D    |         |                 |         |                  |                |                  | 9 |
| 2 | 203.07  | 102.04          |         |                  | 185.06         | 93.03            | S    | 1068.52 | 534.76          | 1051.49 | 526.25           | 1050.51        | 525.76           | 8 |
| 3 | 331.12  | 166.07          | 314.10  | 157.55           | 313.11         | 157.06           | Q    | 981.49  | 491.25          | 964.46  | 482.73           | 963.48         | 482.24           | 7 |
| 4 | 460.17  | 230.59          | 443.14  | 222.07           | 442.16         | 221.58           | E    | 853.43  | 427.22          | 836.40  | 418.71           | 835.42         | 418.21           | 6 |
| 5 | 623.23  | 312.12          | 606.20  | 303.61           | 605.22         | 303.11           | Y    | 724.39  | 362.70          | 707.36  | 354.18           | 706.38         | 353.69           | 5 |
| 6 | 722.30  | 361.65          | 705.27  | 353.14           | 704.29         | 352.65           | V    | 561.32  | 281.17          | 544.30  | 272.65           | 543.31         | 272.16           | 4 |
| 7 | 809.33  | 405.17          | 792.30  | 396.66           | 791.32         | 396.16           | S    | 462.26  | 231.63          | 445.23  | 223.12           | 444.25         | 222.63           | 3 |
| 8 | 1037.44 | 519.22          | 1020.42 | 510.71           | 1019.43        | 510.22           | K    | 375.22  | 188.12          | 358.20  | 179.60           |                |                  | 2 |
| 9 |         |                 |         |                  |                |                  | K    | 147.11  | 74.06           | 130.09  | 65.55            |                |                  | 1 |

**ANEAYLQGQLGNPKGEDQPN<sup>Succ</sup>KK**MS/MS Fragmentation of **ANEAYLQGQLGNPKGEDQPNKK**Found in [gi|170082482](#), fructose-bisphosphate aldolase, class II [Escherichia coli str. K-1

Match to Query 9192: 2499.219501 from(834.080443,3+)

From data file zzh61.dta

Click mouse within plot area to zoom in by factor of two about that point

Or, Plot from  to  Da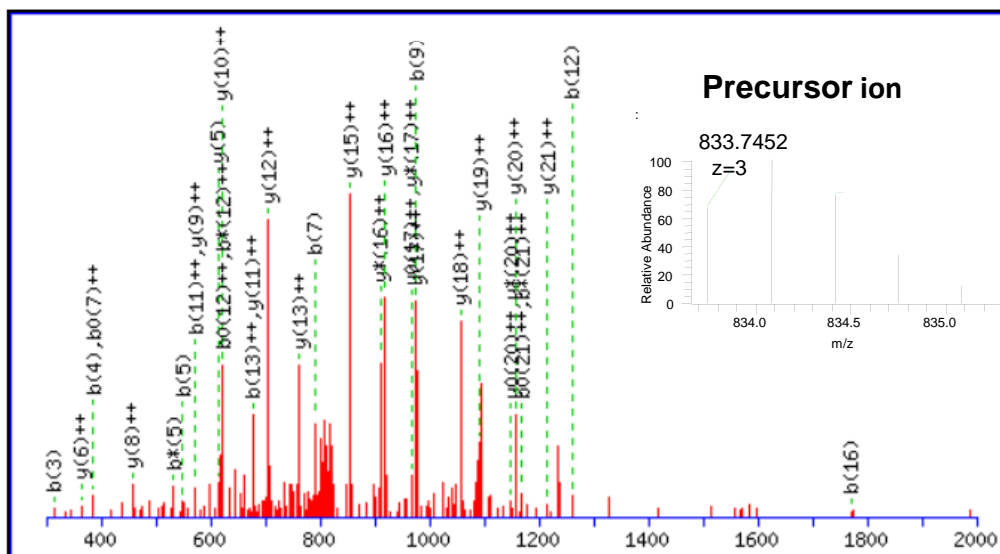

Monoisotopic mass of neutral peptide Mr(calc): 2498.20

Variable modifications:

K14 : Succinyl (K)

Ions Score: 67 Expect: 2e-005

| #  | b       | b <sup>++</sup> | b <sup>*</sup> | b <sup>*++</sup> | b <sup>0</sup> | b <sup>0++</sup> | Seq. | y       | y <sup>++</sup> | y <sup>*</sup> | y <sup>*++</sup> | y <sup>0</sup> | y <sup>0++</sup> | #  |
|----|---------|-----------------|----------------|------------------|----------------|------------------|------|---------|-----------------|----------------|------------------|----------------|------------------|----|
| 1  | 72.04   | 36.53           |                |                  |                |                  | A    |         |                 |                |                  |                |                  | 22 |
| 2  | 186.09  | 93.55           | 169.06         | 85.03            |                |                  | N    | 2428.17 | 1214.59         | 2411.15        | 1206.08          | 2410.16        | 1205.59          | 21 |
| 3  | 315.13  | 158.07          | 298.10         | 149.56           | 297.12         | 149.06           | E    | 2314.13 | 1157.57         | 2297.10        | 1149.06          | 2296.12        | 1148.56          | 20 |
| 4  | 386.17  | 193.59          | 369.14         | 185.07           | 368.16         | 184.58           | A    | 2185.09 | 1093.05         | 2168.06        | 1084.53          | 2167.08        | 1084.04          | 19 |
| 5  | 549.23  | 275.12          | 532.20         | 266.61           | 531.22         | 266.11           | Y    | 2114.05 | 1057.53         | 2097.02        | 1049.02          | 2096.04        | 1048.52          | 18 |
| 6  | 662.31  | 331.66          | 645.29         | 323.15           | 644.30         | 322.66           | L    | 1950.99 | 976.00          | 1933.96        | 967.48           | 1932.98        | 966.99           | 17 |
| 7  | 790.37  | 395.69          | 773.35         | 387.18           | 772.36         | 386.68           | Q    | 1837.90 | 919.46          | 1820.88        | 910.94           | 1819.89        | 910.45           | 16 |
| 8  | 847.39  | 424.20          | 830.37         | 415.69           | 829.38         | 415.20           | G    | 1709.85 | 855.43          | 1692.82        | 846.91           | 1691.83        | 846.42           | 15 |
| 9  | 975.45  | 488.23          | 958.43         | 479.72           | 957.44         | 479.22           | Q    | 1652.82 | 826.92          | 1635.80        | 818.40           | 1634.81        | 817.91           | 14 |
| 10 | 1088.54 | 544.77          | 1071.51        | 536.26           | 1070.53        | 535.77           | L    | 1524.77 | 762.89          | 1507.74        | 754.37           | 1506.75        | 753.88           | 13 |
| 11 | 1145.56 | 573.28          | 1128.53        | 564.77           | 1127.55        | 564.28           | G    | 1411.68 | 706.34          | 1394.65        | 697.83           | 1393.67        | 697.34           | 12 |
| 12 | 1259.60 | 630.30          | 1242.57        | 621.79           | 1241.59        | 621.30           | N    | 1354.66 | 677.83          | 1337.63        | 669.32           | 1336.65        | 668.83           | 11 |
| 13 | 1356.65 | 678.83          | 1339.63        | 670.32           | 1338.64        | 669.83           | P    | 1240.62 | 620.81          | 1223.59        | 612.30           | 1222.61        | 611.81           | 10 |
| 14 | 1584.77 | 792.89          | 1567.74        | 784.37           | 1566.75        | 783.88           | K    | 1143.56 | 572.29          | 1126.54        | 563.77           | 1125.55        | 563.28           | 9  |
| 15 | 1641.79 | 821.40          | 1624.76        | 812.88           | 1623.78        | 812.39           | G    | 915.45  | 458.23          | 898.43         | 449.72           | 897.44         | 449.22           | 8  |
| 16 | 1770.83 | 885.92          | 1753.80        | 877.41           | 1752.82        | 876.91           | E    | 858.43  | 429.72          | 841.41         | 421.21           | 840.42         | 420.71           | 7  |
| 17 | 1885.86 | 943.43          | 1868.83        | 934.92           | 1867.85        | 934.43           | D    | 729.39  | 365.20          | 712.36         | 356.68           | 711.38         | 356.19           | 6  |
| 18 | 2013.91 | 1007.46         | 1996.89        | 998.95           | 1995.90        | 998.46           | Q    | 614.36  | 307.68          | 597.34         | 299.17           |                |                  | 5  |
| 19 | 2110.97 | 1055.99         | 2093.94        | 1047.47          | 2092.96        | 1046.98          | P    | 486.30  | 243.66          | 469.28         | 235.14           |                |                  | 4  |
| 20 | 2225.01 | 1113.01         | 2207.98        | 1104.50          | 2207.00        | 1104.00          | N    | 389.25  | 195.13          | 372.22         | 186.62           |                |                  | 3  |
| 21 | 2353.11 | 1177.06         | 2336.08        | 1168.54          | 2335.09        | 1168.05          | K    | 275.21  | 138.11          | 258.18         | 129.59           |                |                  | 2  |
| 22 |         |                 |                |                  |                |                  | K    | 147.11  | 74.06           | 130.09         | 65.55            |                |                  | 1  |



# fructose-bisphosphate aldolase, class II K326

## GEDQPN<sup>Succ</sup>KK

MS/MS Fragmentation of **GEDQPNKK**

Found in **gij170082482**, fructose-bisphosphate aldolase, class II [Escherichia coli str. K

Match to Query 2812: 1014.465974 from(508.240263,2+)

From data file zzh62.dta

Click mouse within plot area to zoom in by factor of two about that point

Or,   to  Da

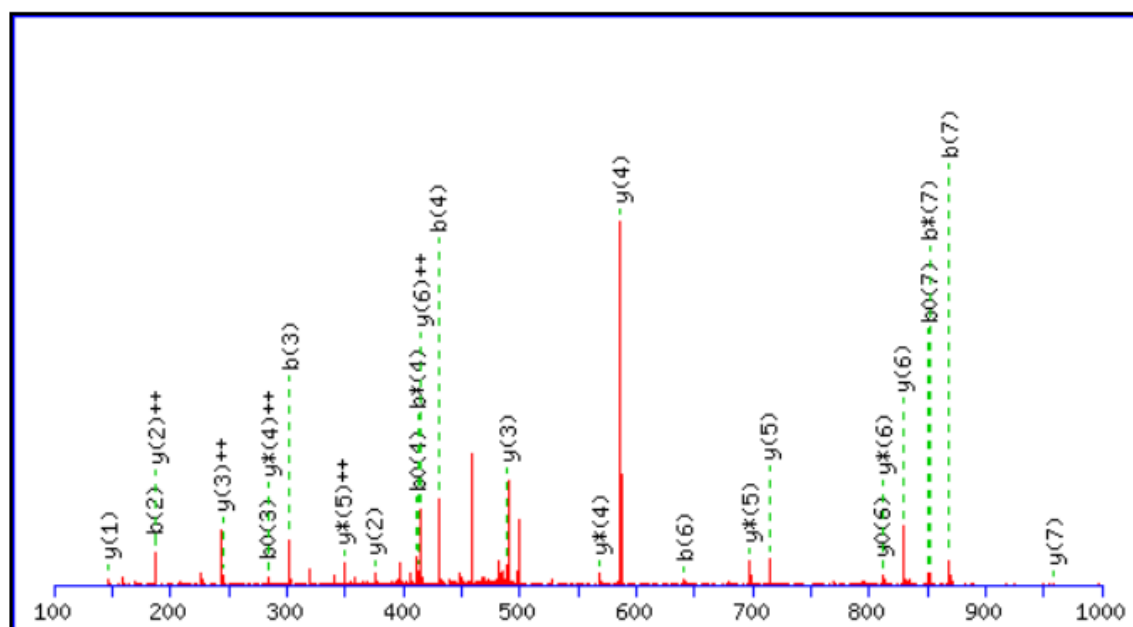

Monoisotopic mass of neutral peptide  $M_r(\text{calc})$ : 1014.46

Variable modifications:

K7 : Succinyl (K)

Ions Score: 32 Expect: 0.053

| # | b      | b <sup>++</sup> | b*     | b <sup>*++</sup> | b <sup>0</sup> | b <sup>0++</sup> | Seq. | y      | y <sup>++</sup> | y*     | y <sup>*++</sup> | y <sup>0</sup> | y <sup>0++</sup> | # |
|---|--------|-----------------|--------|------------------|----------------|------------------|------|--------|-----------------|--------|------------------|----------------|------------------|---|
| 1 | 58.03  | 29.52           |        |                  |                |                  | G    |        |                 |        |                  |                |                  | 8 |
| 2 | 187.07 | 94.04           |        |                  | 169.06         | 85.03            | E    | 958.45 | 479.73          | 941.42 | 471.21           | 940.44         | 470.72           | 7 |
| 3 | 302.10 | 151.55          |        |                  | 284.09         | 142.55           | D    | 829.41 | 415.21          | 812.38 | 406.69           | 811.39         | 406.20           | 6 |
| 4 | 430.16 | 215.58          | 413.13 | 207.07           | 412.15         | 206.58           | Q    | 714.38 | 357.69          | 697.35 | 349.18           |                |                  | 5 |
| 5 | 527.21 | 264.11          | 510.18 | 255.60           | 509.20         | 255.10           | P    | 586.32 | 293.66          | 569.29 | 285.15           |                |                  | 4 |
| 6 | 641.25 | 321.13          | 624.23 | 312.62           | 623.24         | 312.12           | N    | 489.27 | 245.14          | 472.24 | 236.62           |                |                  | 3 |
| 7 | 869.36 | 435.19          | 852.34 | 426.67           | 851.35         | 426.18           | K    | 375.22 | 188.12          | 358.20 | 179.60           |                |                  | 2 |
| 8 |        |                 |        |                  |                |                  | K    | 147.11 | 74.06           | 130.09 | 65.55            |                |                  | 1 |

# fructose-bisphosphate aldolase, class II K348

**LE<sup>Succ</sup>KAFQELNAIDVL**

MS/MS Fragmentation of **LEKAFQELNAIDVL**

Found in **gi|170082482**, fructose-bisphosphate aldolase, class II [Escherichia coli str. K

Match to Query 6936: 1701.890784 from(851.952668,2+)

From data file zzh61.dta

Click mouse within plot area to zoom in by factor of two about that point

Or,   to  Da

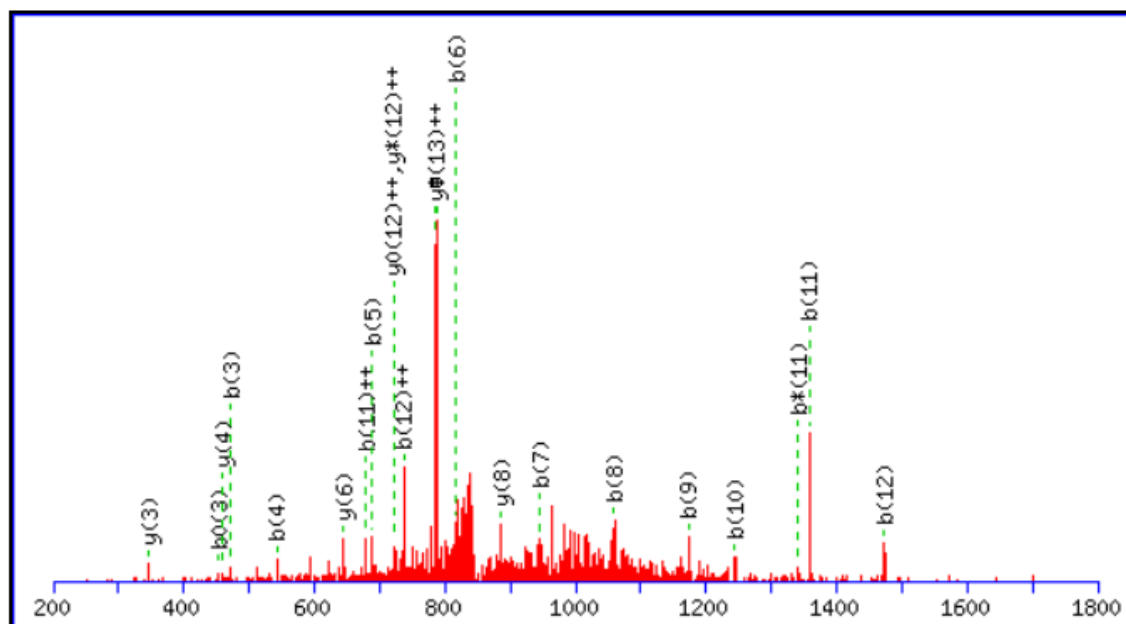

Monoisotopic mass of neutral peptide  $M_r(\text{calc})$ : 1701.88

Variable modifications:

K3 : Succinyl (K)

Ions Score: 44 Expect: 0.003

| #  | b       | b <sup>++</sup> | b*      | b <sup>*++</sup> | b <sup>0</sup> | b <sup>0++</sup> | Seq. | y       | y <sup>++</sup> | y*      | y <sup>*++</sup> | y <sup>0</sup> | y <sup>0++</sup> | #  |
|----|---------|-----------------|---------|------------------|----------------|------------------|------|---------|-----------------|---------|------------------|----------------|------------------|----|
| 1  | 114.09  | 57.55           |         |                  |                |                  | L    |         |                 |         |                  |                |                  | 14 |
| 2  | 243.13  | 122.07          |         |                  | 225.12         | 113.07           | E    | 1589.81 | 795.41          | 1572.78 | 786.89           | 1571.80        | 786.40           | 13 |
| 3  | 471.24  | 236.13          | 454.22  | 227.61           | 453.23         | 227.12           | K    | 1460.76 | 730.89          | 1443.74 | 722.37           | 1442.75        | 721.88           | 12 |
| 4  | 542.28  | 271.64          | 525.26  | 263.13           | 524.27         | 262.64           | A    | 1232.65 | 616.83          | 1215.63 | 608.32           | 1214.64        | 607.82           | 11 |
| 5  | 689.35  | 345.18          | 672.32  | 336.67           | 671.34         | 336.17           | F    | 1161.61 | 581.31          | 1144.59 | 572.80           | 1143.60        | 572.31           | 10 |
| 6  | 817.41  | 409.21          | 800.38  | 400.69           | 799.40         | 400.20           | Q    | 1014.55 | 507.78          | 997.52  | 499.26           | 996.54         | 498.77           | 9  |
| 7  | 946.45  | 473.73          | 929.43  | 465.22           | 928.44         | 464.72           | E    | 886.49  | 443.75          | 869.46  | 435.23           | 868.48         | 434.74           | 8  |
| 8  | 1059.54 | 530.27          | 1042.51 | 521.76           | 1041.53        | 521.27           | L    | 757.45  | 379.23          | 740.42  | 370.71           | 739.43         | 370.22           | 7  |
| 9  | 1173.58 | 587.29          | 1156.55 | 578.78           | 1155.57        | 578.29           | N    | 644.36  | 322.68          | 627.33  | 314.17           | 626.35         | 313.68           | 6  |
| 10 | 1244.62 | 622.81          | 1227.59 | 614.30           | 1226.61        | 613.81           | A    | 530.32  | 265.66          |         |                  | 512.31         | 256.66           | 5  |
| 11 | 1357.70 | 679.35          | 1340.67 | 670.84           | 1339.69        | 670.35           | I    | 459.28  | 230.14          |         |                  | 441.27         | 221.14           | 4  |
| 12 | 1472.73 | 736.87          | 1455.70 | 728.35           | 1454.72        | 727.86           | D    | 346.20  | 173.60          |         |                  | 328.19         | 164.60           | 3  |
| 13 | 1571.80 | 786.40          | 1554.77 | 777.89           | 1553.78        | 777.40           | V    | 231.17  | 116.09          |         |                  |                |                  | 2  |
| 14 |         |                 |         |                  |                |                  | L    | 132.10  | 66.55           |         |                  |                |                  | 1  |

# protein chain elongation factor EF-Tu

K38

## TTLTAAITTVLA<sup>Succ</sup>KTYGGAAR

MS/MS Fragmentation of **TTLTAAITTVLAKTYGGAAR**

Found in **gi|170083440**, protein chain elongation factor EF-Tu (duplicate of tufA) [EscI]

Match to Query 15375: 2079.115394 from(1040.564973,2+)

From data file xie021.dta

Click mouse within plot area to zoom in by factor of two about that point

Or,   to  Da

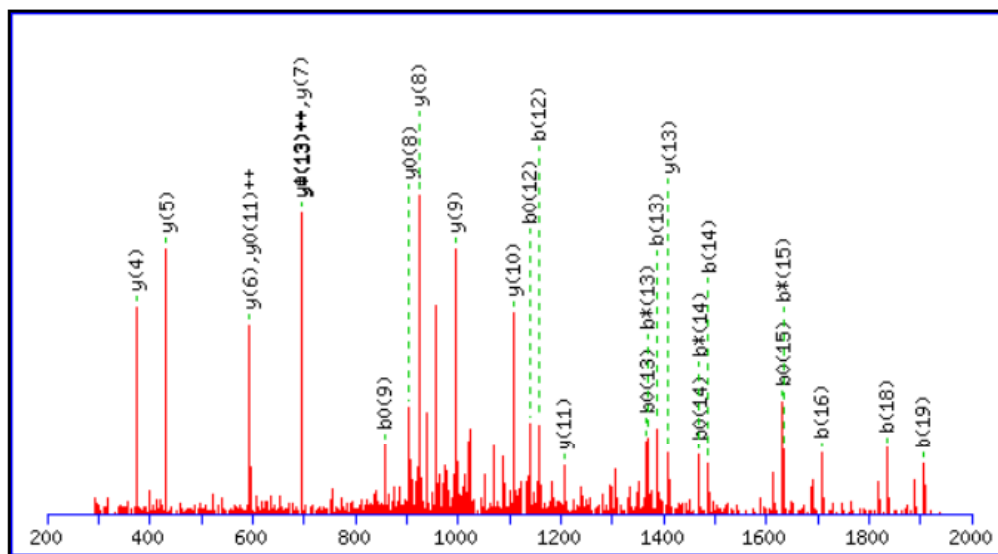

Monoisotopic mass of neutral peptide  $M_r(\text{calc})$ : 2079.12

Variable modifications:

K13 : Succinyl (K)

Ions Score: 76 Expect: 3.7e-006

| #  | b              | b <sup>++</sup> | b*             | b <sup>*++</sup> | b <sup>0</sup> | b <sup>0++</sup> | Seq. | y              | y <sup>++</sup> | y*      | y <sup>*++</sup> | y <sup>0</sup> | y <sup>0++</sup> | #  |
|----|----------------|-----------------|----------------|------------------|----------------|------------------|------|----------------|-----------------|---------|------------------|----------------|------------------|----|
| 1  | 102.05         | 51.53           |                |                  | 84.04          | 42.53            | T    |                |                 |         |                  |                |                  | 20 |
| 2  | 203.10         | 102.05          |                |                  | 185.09         | 93.05            | T    | 1979.08        | 990.04          | 1962.05 | 981.53           | 1961.07        | 981.04           | 19 |
| 3  | 316.19         | 158.60          |                |                  | 298.18         | 149.59           | L    | 1878.03        | 939.52          | 1861.01 | 931.01           | 1860.02        | 930.51           | 18 |
| 4  | 417.23         | 209.12          |                |                  | 399.22         | 200.12           | T    | 1764.95        | 882.98          | 1747.92 | 874.46           | 1746.94        | 873.97           | 17 |
| 5  | 488.27         | 244.64          |                |                  | 470.26         | 235.63           | A    | 1663.90        | 832.45          | 1646.87 | 823.94           | 1645.89        | 823.45           | 16 |
| 6  | 559.31         | 280.16          |                |                  | 541.30         | 271.15           | A    | 1592.86        | 796.94          | 1575.84 | 788.42           | 1574.85        | 787.93           | 15 |
| 7  | 672.39         | 336.70          |                |                  | 654.38         | 327.69           | I    | 1521.83        | 761.42          | 1504.80 | 752.90           | 1503.82        | 752.41           | 14 |
| 8  | 773.44         | 387.22          |                |                  | 755.43         | 378.22           | T    | <b>1408.74</b> | 704.88          | 1391.72 | <b>696.36</b>    | 1390.73        | <b>695.87</b>    | 13 |
| 9  | 874.49         | 437.75          |                |                  | <b>856.48</b>  | 428.74           | T    | 1307.70        | 654.35          | 1290.67 | 645.84           | 1289.68        | 645.35           | 12 |
| 10 | 973.56         | 487.28          |                |                  | 955.55         | 478.28           | V    | <b>1206.65</b> | 603.83          | 1189.62 | 595.31           | 1188.64        | <b>594.82</b>    | 11 |
| 11 | 1086.64        | 543.82          |                |                  | 1068.63        | 534.82           | L    | <b>1107.58</b> | 554.29          | 1090.55 | 545.78           | 1089.57        | 545.29           | 10 |
| 12 | <b>1157.68</b> | 579.34          |                |                  | <b>1139.67</b> | 570.34           | A    | <b>994.50</b>  | 497.75          | 977.47  | 489.24           | 976.48         | 488.75           | 9  |
| 13 | <b>1385.79</b> | 693.40          | <b>1368.76</b> | 684.88           | <b>1367.78</b> | 684.39           | K    | <b>923.46</b>  | 462.23          | 906.43  | 453.72           | <b>905.45</b>  | 453.23           | 8  |
| 14 | <b>1486.84</b> | 743.92          | <b>1469.81</b> | 735.41           | <b>1468.83</b> | 734.92           | T    | <b>695.35</b>  | 348.18          | 678.32  | 339.66           | 677.34         | 339.17           | 7  |
| 15 | 1649.90        | 825.45          | <b>1632.87</b> | 816.94           | <b>1631.89</b> | 816.45           | Y    | <b>594.30</b>  | 297.65          | 577.27  | 289.14           |                |                  | 6  |
| 16 | <b>1706.92</b> | 853.96          | 1689.89        | 845.45           | 1688.91        | 844.96           | G    | <b>431.24</b>  | 216.12          | 414.21  | 207.61           |                |                  | 5  |
| 17 | 1763.94        | 882.47          | 1746.92        | 873.96           | 1745.93        | 873.47           | G    | <b>374.21</b>  | 187.61          | 357.19  | 179.10           |                |                  | 4  |
| 18 | <b>1834.98</b> | 917.99          | 1817.95        | 909.48           | 1816.97        | 908.99           | A    | 317.19         | 159.10          | 300.17  | 150.59           |                |                  | 3  |
| 19 | <b>1906.02</b> | 953.51          | 1888.99        | 945.00           | 1888.01        | 944.51           | A    | 246.16         | 123.58          | 229.13  | 115.07           |                |                  | 2  |
| 20 |                |                 |                |                  |                |                  | R    | 175.12         | 88.06           | 158.09  | 79.55            |                |                  | 1  |

# protein chain elongation factor EF-Tu K177

## GSAL<sup>Succ</sup>KALEGDAEWEAK

MS/MS Fragmentation of **GSALKALEGDAEWEAK**

Found in [gij170082857](#), protein chain elongation factor EF-Tu (duplicate of tufB) [Esch

Match to Query 7225: 1773.847934 from(887.931243,2+)

From data file zzh61.dta

Click mouse within plot area to zoom in by factor of two about that point

Or,   to  Da

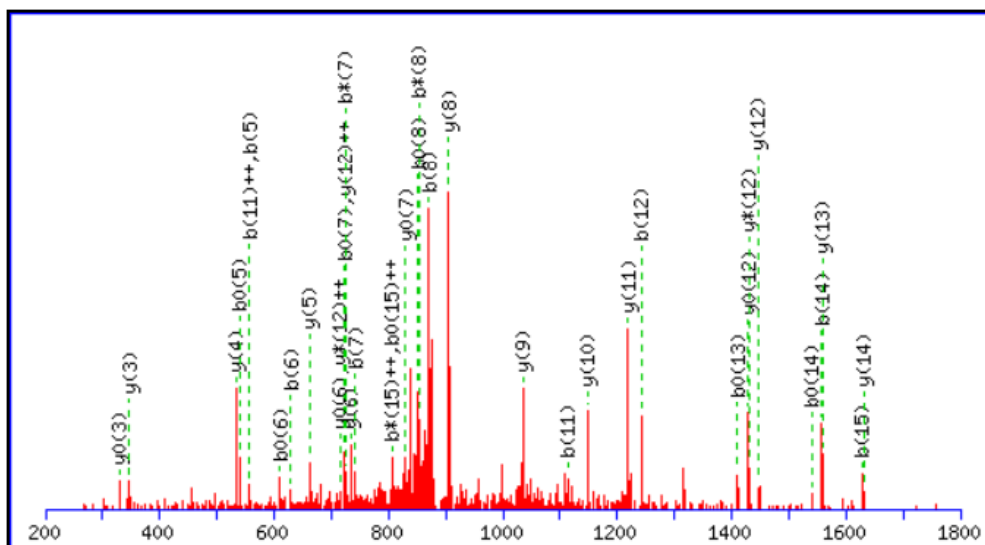

Monoisotopic mass of neutral peptide  $M_r(\text{calc})$ : 1773.84

Variable modifications:

K5 : Succinyl (K)

Ions Score: 65 Expect: 2.3e-005

| #  | b              | b <sup>++</sup> | b*            | b <sup>*++</sup> | b <sup>0</sup> | b <sup>0++</sup> | Seq. | y              | y <sup>++</sup> | y*             | y <sup>*++</sup> | y <sup>0</sup> | y <sup>0++</sup> | #  |
|----|----------------|-----------------|---------------|------------------|----------------|------------------|------|----------------|-----------------|----------------|------------------|----------------|------------------|----|
| 1  | 58.03          | 29.52           |               |                  |                |                  | G    |                |                 |                |                  |                |                  | 16 |
| 2  | 145.06         | 73.03           |               |                  | 127.05         | 64.03            | S    | 1717.83        | 859.42          | 1700.80        | 850.90           | 1699.82        | 850.41           | 15 |
| 3  | 216.10         | 108.55          |               |                  | 198.09         | 99.55            | A    | <b>1630.80</b> | 815.90          | 1613.77        | 807.39           | 1612.79        | 806.90           | 14 |
| 4  | <b>329.18</b>  | 165.09          |               |                  | 311.17         | 156.09           | L    | <b>1559.76</b> | 780.38          | 1542.73        | 771.87           | 1541.75        | 771.38           | 13 |
| 5  | <b>557.29</b>  | 279.15          | 540.27        | 270.64           | <b>539.28</b>  | 270.14           | K    | <b>1446.67</b> | <b>723.84</b>   | <b>1429.65</b> | <b>715.33</b>    | <b>1428.66</b> | 714.84           | 12 |
| 6  | <b>628.33</b>  | 314.67          | 611.30        | 306.16           | <b>610.32</b>  | 305.66           | A    | <b>1218.56</b> | 609.79          | 1201.54        | 601.27           | 1200.55        | 600.78           | 11 |
| 7  | <b>741.41</b>  | 371.21          | <b>724.39</b> | 362.70           | <b>723.40</b>  | 362.21           | L    | <b>1147.53</b> | 574.27          | 1130.50        | 565.75           | 1129.52        | 565.26           | 10 |
| 8  | <b>870.46</b>  | 435.73          | <b>853.43</b> | 427.22           | <b>852.45</b>  | 426.73           | E    | <b>1034.44</b> | 517.72          | 1017.42        | 509.21           | 1016.43        | 508.72           | 9  |
| 9  | 927.48         | 464.24          | 910.45        | 455.73           | 909.47         | 455.24           | G    | <b>905.40</b>  | 453.20          | 888.37         | 444.69           | 887.39         | 444.20           | 8  |
| 10 | 1042.51        | 521.76          | 1025.48       | 513.24           | 1024.49        | 512.75           | D    | 848.38         | 424.69          | 831.35         | 416.18           | <b>830.37</b>  | 415.69           | 7  |
| 11 | <b>1113.54</b> | <b>557.27</b>   | 1096.52       | 548.76           | 1095.53        | 548.27           | A    | <b>733.35</b>  | 367.18          | 716.32         | 358.67           | <b>715.34</b>  | 358.17           | 6  |
| 12 | <b>1242.58</b> | 621.80          | 1225.56       | 613.28           | 1224.57        | 612.79           | E    | <b>662.31</b>  | 331.66          | 645.29         | 323.15           | 644.30         | 322.66           | 5  |
| 13 | <b>1428.66</b> | 714.84          | 1411.64       | 706.32           | <b>1410.65</b> | 705.83           | W    | <b>533.27</b>  | 267.14          | 516.25         | 258.63           | 515.26         | 258.13           | 4  |
| 14 | <b>1557.71</b> | 779.36          | 1540.68       | 770.84           | <b>1539.70</b> | 770.35           | E    | <b>347.19</b>  | 174.10          | 330.17         | 165.59           | <b>329.18</b>  | 165.09           | 3  |
| 15 | <b>1628.74</b> | 814.88          | 1611.72       | <b>806.36</b>    | 1610.73        | <b>805.87</b>    | A    | 218.15         | 109.58          | 201.12         | 101.07           |                |                  | 2  |
| 16 |                |                 |               |                  |                |                  | K    | 147.11         | 74.06           | 130.09         | 65.55            |                |                  | 1  |

# protein chain elongation factor EF-Tu K249

## VGEEVEIVGI<sup>Succ</sup>KETQK

MS/MS Fragmentation of **VGEEVEIVGIKETQK**

Found in **gi|170082857**, protein chain elongation factor EF-Tu (duplicate of tufB) [Esch]

Match to Query 7140: 1757.918124 from(879.966338,2+)

From data file zzh61.dta

Click mouse within plot area to zoom in by factor of two about that point

Or,   to  Da

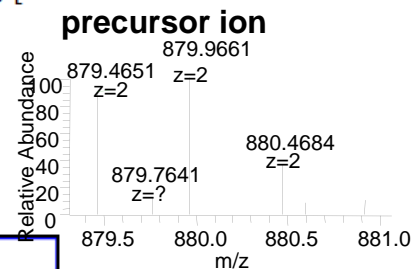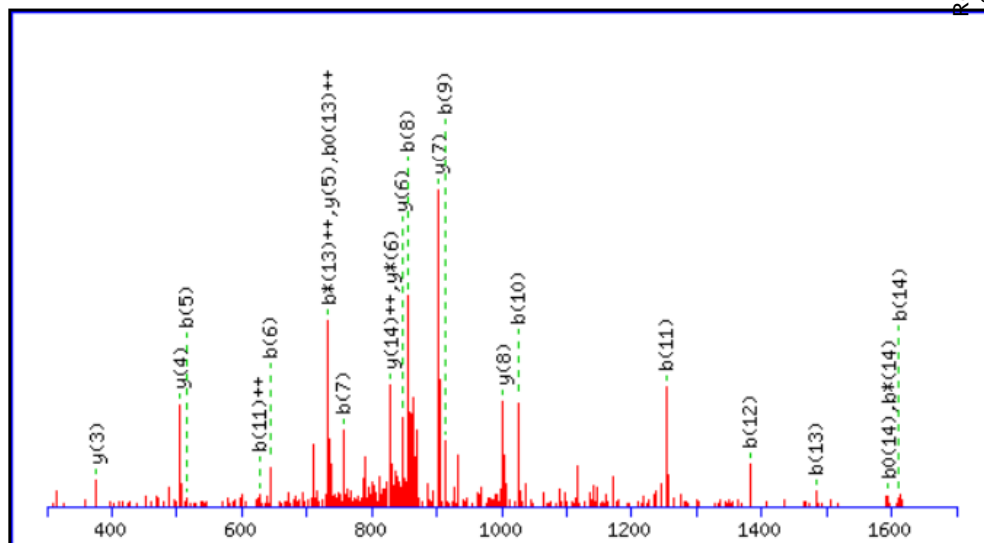

Monoisotopic mass of neutral peptide  $M_r(\text{calc})$ : 1756.91

Variable modifications:

K11 : Succinyl (K)

Ions Score: 67 Expect: 1.5e-005

| #  | b       | b <sup>++</sup> | b*      | b <sup>*++</sup> | b <sup>0</sup> | b <sup>0++</sup> | Seq. | y       | y <sup>++</sup> | y*      | y <sup>*++</sup> | y <sup>0</sup> | y <sup>0++</sup> | #  |
|----|---------|-----------------|---------|------------------|----------------|------------------|------|---------|-----------------|---------|------------------|----------------|------------------|----|
| 1  | 100.08  | 50.54           |         |                  |                |                  | V    |         |                 |         |                  |                |                  | 15 |
| 2  | 157.10  | 79.05           |         |                  |                |                  | G    | 1658.85 | 829.93          | 1641.82 | 821.41           | 1640.84        | 820.92           | 14 |
| 3  | 286.14  | 143.57          |         |                  | 268.13         | 134.57           | E    | 1601.83 | 801.42          | 1584.80 | 792.90           | 1583.82        | 792.41           | 13 |
| 4  | 415.18  | 208.09          |         |                  | 397.17         | 199.09           | E    | 1472.78 | 736.90          | 1455.76 | 728.38           | 1454.77        | 727.89           | 12 |
| 5  | 514.25  | 257.63          |         |                  | 496.24         | 248.62           | V    | 1343.74 | 672.37          | 1326.72 | 663.86           | 1325.73        | 663.37           | 11 |
| 6  | 643.29  | 322.15          |         |                  | 625.28         | 313.15           | E    | 1244.67 | 622.84          | 1227.65 | 614.33           | 1226.66        | 613.83           | 10 |
| 7  | 756.38  | 378.69          |         |                  | 738.37         | 369.69           | I    | 1115.63 | 558.32          | 1098.60 | 549.81           | 1097.62        | 549.31           | 9  |
| 8  | 855.45  | 428.23          |         |                  | 837.44         | 419.22           | V    | 1002.55 | 501.78          | 985.52  | 493.26           | 984.54         | 492.77           | 8  |
| 9  | 912.47  | 456.74          |         |                  | 894.46         | 447.73           | G    | 903.48  | 452.24          | 886.45  | 443.73           | 885.47         | 443.24           | 7  |
| 10 | 1025.55 | 513.28          |         |                  | 1007.54        | 504.27           | I    | 846.46  | 423.73          | 829.43  | 415.22           | 828.45         | 414.73           | 6  |
| 11 | 1253.66 | 627.33          | 1236.64 | 618.82           | 1235.65        | 618.33           | K    | 733.37  | 367.19          | 716.35  | 358.68           | 715.36         | 358.18           | 5  |
| 12 | 1382.70 | 691.86          | 1365.68 | 683.34           | 1364.69        | 682.85           | E    | 505.26  | 253.13          | 488.24  | 244.62           | 487.25         | 244.13           | 4  |
| 13 | 1483.75 | 742.38          | 1466.73 | 733.87           | 1465.74        | 733.37           | T    | 376.22  | 188.61          | 359.19  | 180.10           | 358.21         | 179.61           | 3  |
| 14 | 1611.81 | 806.41          | 1594.78 | 797.90           | 1593.80        | 797.40           | Q    | 275.17  | 138.09          | 258.14  | 129.58           |                |                  | 2  |
| 15 |         |                 |         |                  |                |                  | K    | 147.11  | 74.06           | 130.09  | 65.55            |                |                  | 1  |

# protein chain elongation factor EF-Tu K253

## ETQ<sup>Succ</sup>KSTCTGVEMFR

MS/MS Fragmentation of **ETQKSTCTGVEMFR**

Found in [gi|170083440](#), protein chain elongation factor EF-Tu (duplicate of tufA) [Esch

Match to Query 13206: 1772.768834 from(887.391693,2+)

From data file xie021.dta

Click mouse within plot area to zoom in by factor of two about that point

Or,   to  Da

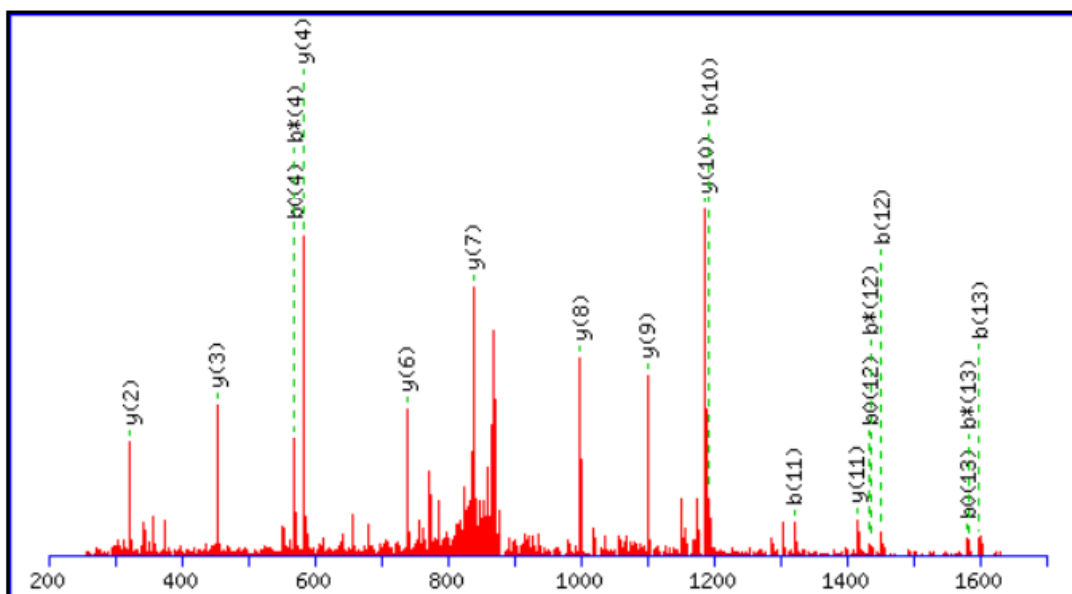

Monoisotopic mass of neutral peptide  $M_r(\text{calc})$ : 1772.77

Variable modifications:

K4 : Succinyl (K)

C7 : Carbamidomethyl (C)

Ion Score: 68 Expect: 2e-005

| #  | b              | b <sup>++</sup> | b*             | b <sup>*++</sup> | b <sup>0</sup> | b <sup>0++</sup> | Seq. | y              | y <sup>++</sup> | y*      | y <sup>*++</sup> | y <sup>0</sup> | y <sup>0++</sup> | #  |
|----|----------------|-----------------|----------------|------------------|----------------|------------------|------|----------------|-----------------|---------|------------------|----------------|------------------|----|
| 1  | 130.05         | 65.53           |                |                  | 112.04         | 56.52            | E    |                |                 |         |                  |                |                  | 14 |
| 2  | 231.10         | 116.05          |                |                  | 213.09         | 107.05           | T    | 1644.74        | 822.87          | 1627.71 | 814.36           | 1626.73        | 813.87           | 13 |
| 3  | 359.16         | 180.08          | 342.13         | 171.57           | 341.15         | 171.08           | Q    | 1543.69        | 772.35          | 1526.66 | 763.83           | 1525.68        | 763.34           | 12 |
| 4  | 587.27         | 294.14          | <b>570.24</b>  | 285.62           | <b>569.26</b>  | 285.13           | K    | <b>1415.63</b> | 708.32          | 1398.60 | 699.81           | 1397.62        | 699.31           | 11 |
| 5  | 674.30         | 337.65          | 657.27         | 329.14           | 656.29         | 328.65           | S    | <b>1187.52</b> | 594.26          | 1170.49 | 585.75           | 1169.51        | 585.26           | 10 |
| 6  | 775.35         | 388.18          | 758.32         | 379.66           | 757.34         | 379.17           | T    | <b>1100.49</b> | 550.75          | 1083.46 | 542.23           | 1082.48        | 541.74           | 9  |
| 7  | 935.38         | 468.19          | 918.35         | 459.68           | 917.37         | 459.19           | C    | <b>999.44</b>  | 500.22          | 982.41  | 491.71           | 981.43         | 491.22           | 8  |
| 8  | 1036.43        | 518.72          | 1019.40        | 510.20           | 1018.41        | 509.71           | T    | <b>839.41</b>  | 420.21          | 822.38  | 411.69           | 821.40         | 411.20           | 7  |
| 9  | 1093.45        | 547.23          | 1076.42        | 538.71           | 1075.44        | 538.22           | G    | <b>738.36</b>  | 369.68          | 721.33  | 361.17           | 720.35         | 360.68           | 6  |
| 10 | <b>1192.52</b> | 596.76          | 1175.49        | 588.25           | 1174.50        | 587.76           | V    | 681.34         | 341.17          | 664.31  | 332.66           | 663.33         | 332.17           | 5  |
| 11 | <b>1321.56</b> | 661.28          | 1304.53        | 652.77           | 1303.55        | 652.28           | E    | <b>582.27</b>  | 291.64          | 565.24  | 283.13           | 564.26         | 282.63           | 4  |
| 12 | <b>1452.60</b> | 726.80          | <b>1435.57</b> | 718.29           | <b>1434.59</b> | 717.80           | M    | <b>453.23</b>  | 227.12          | 436.20  | 218.60           |                |                  | 3  |
| 13 | <b>1599.67</b> | 800.34          | <b>1582.64</b> | 791.82           | <b>1581.66</b> | 791.33           | F    | <b>322.19</b>  | 161.60          | 305.16  | 153.08           |                |                  | 2  |
| 14 |                |                 |                |                  |                |                  | R    | 175.12         | 88.06           | 158.09  | 79.55            |                |                  | 1  |

# protein chain elongation factor EF-Tu K295

## GQVLA<sup>Succ</sup>KPGTIKPHTK

MS/MS Fragmentation of **GQVLA**KPGTIKPHTK

Found in **gi170083440**, protein chain elongation factor EF-Tu (duplicate of tufA) [Esche

Match to Query 11947: 1673.946084 from(837.980318,2+)

From data file xie021.dta

Click mouse within plot area to zoom in by factor of two about that point

Or,   to  Da

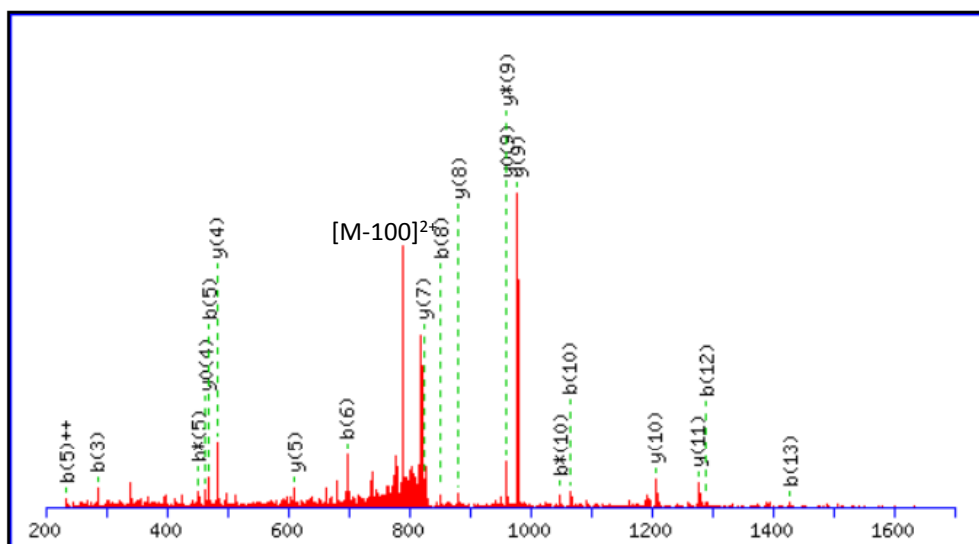

Monoisotopic mass of neutral peptide  $M_r(\text{calc})$ : 1673.95

Variable modifications:

K6 : Succinyl (K)

Ions Score: 35 Expect: 0.037

| #  | b       | b <sup>++</sup> | b*      | b <sup>*++</sup> | b <sup>0</sup> | b <sup>0++</sup> | Seq. | y       | y <sup>++</sup> | y*      | y <sup>*++</sup> | y <sup>0</sup> | y <sup>0++</sup> | #  |
|----|---------|-----------------|---------|------------------|----------------|------------------|------|---------|-----------------|---------|------------------|----------------|------------------|----|
| 1  | 58.03   | 29.52           |         |                  |                |                  | G    |         |                 |         |                  |                |                  | 15 |
| 2  | 186.09  | 93.55           | 169.06  | 85.03            |                |                  | Q    | 1617.93 | 809.47          | 1600.91 | 800.96           | 1599.92        | 800.46           | 14 |
| 3  | 285.16  | 143.08          | 268.13  | 134.57           |                |                  | V    | 1489.87 | 745.44          | 1472.85 | 736.93           | 1471.86        | 736.44           | 13 |
| 4  | 398.24  | 199.62          | 381.21  | 191.11           |                |                  | L    | 1390.81 | 695.91          | 1373.78 | 687.39           | 1372.79        | 686.90           | 12 |
| 5  | 469.28  | 235.14          | 452.25  | 226.63           |                |                  | A    | 1277.72 | 639.36          | 1260.69 | 630.85           | 1259.71        | 630.36           | 11 |
| 6  | 697.39  | 349.20          | 680.36  | 340.68           |                |                  | K    | 1206.68 | 603.85          | 1189.66 | 595.33           | 1188.67        | 594.84           | 10 |
| 7  | 794.44  | 397.72          | 777.41  | 389.21           |                |                  | P    | 978.57  | 489.79          | 961.55  | 481.28           | 960.56         | 480.78           | 9  |
| 8  | 851.46  | 426.23          | 834.44  | 417.72           |                |                  | G    | 881.52  | 441.26          | 864.49  | 432.75           | 863.51         | 432.26           | 8  |
| 9  | 952.51  | 476.76          | 935.48  | 468.25           | 934.50         | 467.75           | T    | 824.50  | 412.75          | 807.47  | 404.24           | 806.49         | 403.75           | 7  |
| 10 | 1065.59 | 533.30          | 1048.57 | 524.79           | 1047.58        | 524.30           | I    | 723.45  | 362.23          | 706.42  | 353.72           | 705.44         | 353.22           | 6  |
| 11 | 1193.69 | 597.35          | 1176.66 | 588.83           | 1175.68        | 588.34           | K    | 610.37  | 305.69          | 593.34  | 297.17           | 592.36         | 296.68           | 5  |
| 12 | 1290.74 | 645.87          | 1273.72 | 637.36           | 1272.73        | 636.87           | P    | 482.27  | 241.64          | 465.25  | 233.13           | 464.26         | 232.63           | 4  |
| 13 | 1427.80 | 714.40          | 1410.77 | 705.89           | 1409.79        | 705.40           | H    | 385.22  | 193.11          | 368.19  | 184.60           | 367.21         | 184.11           | 3  |
| 14 | 1528.85 | 764.93          | 1511.82 | 756.41           | 1510.84        | 755.92           | T    | 248.16  | 124.58          | 231.13  | 116.07           | 230.15         | 115.58           | 2  |
| 15 |         |                 |         |                  |                |                  | K    | 147.11  | 74.06           | 130.09  | 65.55            |                |                  | 1  |

# protein chain elongation factor EF-Tu K314

## FESEVYILS<sup>Succ</sup>KDEGGR

### MS/MS Fragmentation of FESEVYILSKDEGGR

Found in [gij170082857](#), protein chain elongation factor EF-Tu (duplicate of tufB) [Esch

Match to Query 7485: 1827.863074 from(914.938813,2+)

From data file zzh61.dta

Click mouse within plot area to zoom in by factor of two about that point

Or,   to  Da

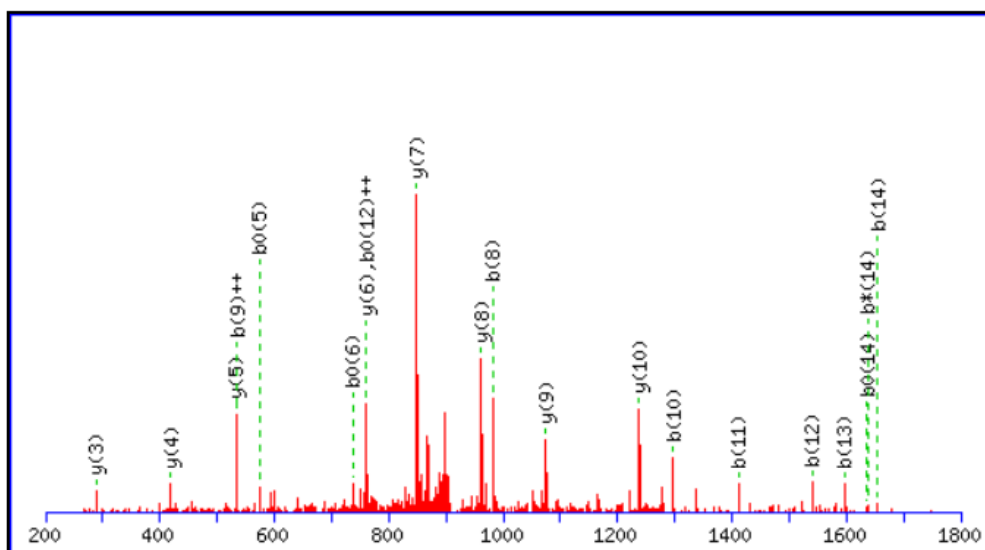

Monoisotopic mass of neutral peptide  $M_r(\text{calc})$ : 1827.85

Variable modifications:

K10 : Succinyl (K)

Ions Score: 72 Expect: 4.1e-006

| #  | b       | b <sup>++</sup> | b <sup>*</sup> | b <sup>*++</sup> | b <sup>0</sup> | b <sup>0++</sup> | Seq. | y       | y <sup>++</sup> | y <sup>*</sup> | y <sup>*++</sup> | y <sup>0</sup> | y <sup>0++</sup> | #  |
|----|---------|-----------------|----------------|------------------|----------------|------------------|------|---------|-----------------|----------------|------------------|----------------|------------------|----|
| 1  | 148.08  | 74.54           |                |                  |                |                  | F    |         |                 |                |                  |                |                  | 15 |
| 2  | 277.12  | 139.06          |                |                  | 259.11         | 130.06           | E    | 1681.79 | 841.40          | 1664.76        | 832.89           | 1663.78        | 832.39           | 14 |
| 3  | 364.15  | 182.58          |                |                  | 346.14         | 173.57           | S    | 1552.75 | 776.88          | 1535.72        | 768.36           | 1534.74        | 767.87           | 13 |
| 4  | 493.19  | 247.10          |                |                  | 475.18         | 238.09           | E    | 1465.72 | 733.36          | 1448.69        | 724.85           | 1447.71        | 724.36           | 12 |
| 5  | 592.26  | 296.63          |                |                  | 574.25         | 287.63           | V    | 1336.67 | 668.84          | 1319.65        | 660.33           | 1318.66        | 659.84           | 11 |
| 6  | 755.32  | 378.17          |                |                  | 737.31         | 369.16           | Y    | 1237.61 | 619.31          | 1220.58        | 610.79           | 1219.60        | 610.30           | 10 |
| 7  | 868.41  | 434.71          |                |                  | 850.40         | 425.70           | I    | 1074.54 | 537.77          | 1057.52        | 529.26           | 1056.53        | 528.77           | 9  |
| 8  | 981.49  | 491.25          |                |                  | 963.48         | 482.24           | L    | 961.46  | 481.23          | 944.43         | 472.72           | 943.45         | 472.23           | 8  |
| 9  | 1068.52 | 534.77          |                |                  | 1050.51        | 525.76           | S    | 848.37  | 424.69          | 831.35         | 416.18           | 830.36         | 415.69           | 7  |
| 10 | 1296.64 | 648.82          | 1279.61        | 640.31           | 1278.63        | 639.82           | K    | 761.34  | 381.17          | 744.32         | 372.66           | 743.33         | 372.17           | 6  |
| 11 | 1411.66 | 706.34          | 1394.64        | 697.82           | 1393.65        | 697.33           | D    | 533.23  | 267.12          | 516.20         | 258.61           | 515.22         | 258.11           | 5  |
| 12 | 1540.71 | 770.86          | 1523.68        | 762.34           | 1522.69        | 761.85           | E    | 418.20  | 209.61          | 401.18         | 201.09           | 400.19         | 200.60           | 4  |
| 13 | 1597.73 | 799.37          | 1580.70        | 790.85           | 1579.72        | 790.36           | G    | 289.16  | 145.08          | 272.14         | 136.57           |                |                  | 3  |
| 14 | 1654.75 | 827.88          | 1637.72        | 819.36           | 1636.74        | 818.87           | G    | 232.14  | 116.57          | 215.11         | 108.06           |                |                  | 2  |
| 15 |         |                 |                |                  |                |                  | R    | 175.12  | 88.06           | 158.09         | 79.55            |                |                  | 1  |



# pyruvate formate lyase I K63

## VMEGV<sup>Succ</sup>KLENR

MS/MS Fragmentation of **VMEGVKLENR**

Found in [gi|170080561](#), pyruvate formate lyase I [Escherichia coli str. K-12 substr. DF]

Match to Query 6810: 1273.634194 from(637.824373,2+)

From data file xie021.dta

Click mouse within plot area to zoom in by factor of two about that point

Or,   to  Da

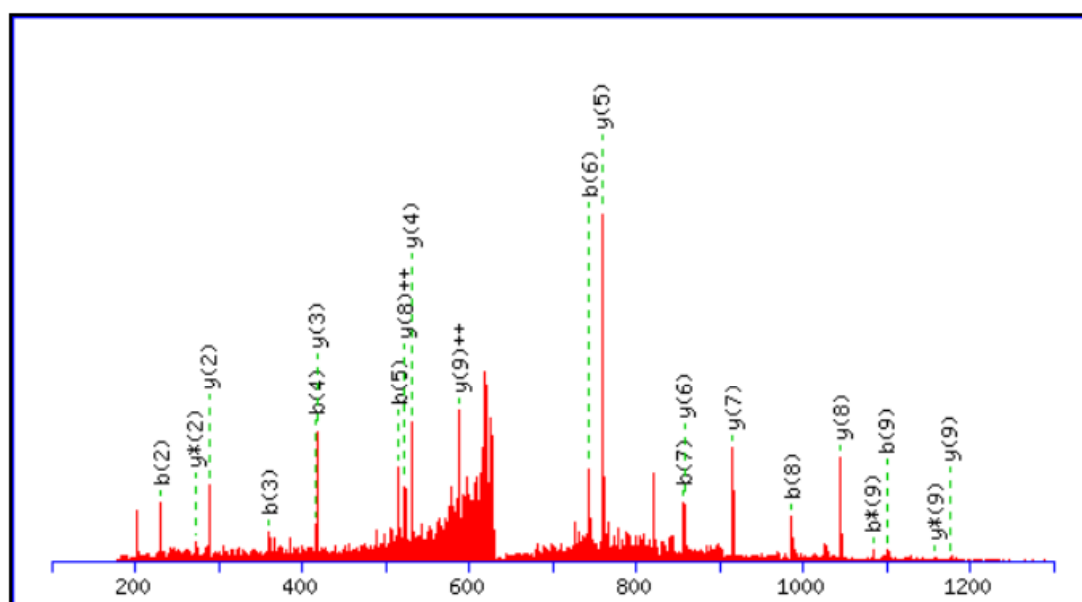

Monoisotopic mass of neutral peptide  $M_r(\text{calc})$ : 1273.63

Variable modifications:

K6 : Succinyl (K)

Ions Score: 51 Expect: 0.00074

| #  | b              | b <sup>++</sup> | b*             | b <sup>*++</sup> | b <sup>0</sup> | b <sup>0++</sup> | Seq. | y              | y <sup>++</sup> | y*             | y <sup>*++</sup> | y <sup>0</sup> | y <sup>0++</sup> | #  |
|----|----------------|-----------------|----------------|------------------|----------------|------------------|------|----------------|-----------------|----------------|------------------|----------------|------------------|----|
| 1  | 100.08         | 50.54           |                |                  |                |                  | V    |                |                 |                |                  |                |                  | 10 |
| 2  | <b>231.12</b>  | 116.06          |                |                  |                |                  | M    | <b>1175.57</b> | <b>588.29</b>   | <b>1158.55</b> | 579.78           | 1157.56        | 579.28           | 9  |
| 3  | <b>360.16</b>  | 180.58          |                |                  | 342.15         | 171.58           | E    | <b>1044.53</b> | <b>522.77</b>   | 1027.51        | 514.26           | 1026.52        | 513.76           | 8  |
| 4  | <b>417.18</b>  | 209.09          |                |                  | 399.17         | 200.09           | G    | <b>915.49</b>  | 458.25          | 898.46         | 449.74           | 897.48         | 449.24           | 7  |
| 5  | <b>516.25</b>  | 258.63          |                |                  | 498.24         | 249.62           | V    | <b>858.47</b>  | 429.74          | 841.44         | 421.22           | 840.46         | 420.73           | 6  |
| 6  | <b>744.36</b>  | 372.68          | 727.33         | 364.17           | 726.35         | 363.68           | K    | <b>759.40</b>  | 380.20          | 742.37         | 371.69           | 741.39         | 371.20           | 5  |
| 7  | <b>857.44</b>  | 429.23          | 840.42         | 420.71           | 839.43         | 420.22           | L    | <b>531.29</b>  | 266.15          | 514.26         | 257.63           | 513.28         | 257.14           | 4  |
| 8  | <b>986.49</b>  | 493.75          | 969.46         | 485.23           | 968.48         | 484.74           | E    | <b>418.20</b>  | 209.61          | 401.18         | 201.09           | 400.19         | 200.60           | 3  |
| 9  | <b>1100.53</b> | 550.77          | <b>1083.50</b> | 542.25           | 1082.52        | 541.76           | N    | <b>289.16</b>  | 145.08          | <b>272.14</b>  | 136.57           |                |                  | 2  |
| 10 |                |                 |                |                  |                |                  | R    | 175.12         | 88.06           | 158.09         | 79.55            |                |                  | 1  |

# pyruvate formate lyase I K107

## IVGLQTEAPL<sup>Succ</sup>KR

MS/MS Fragmentation of **IVGLQTEAPLKR**

Found in [gi|170080561](#), pyruvate formate lyase I [Escherichia coli str. K-12 substr. DH

Match to Query 8719: 1423.805454 from(712.910003,2+)

From data file xie021.dta

Click mouse within plot area to zoom in by factor of two about that point

Or,   to  Da

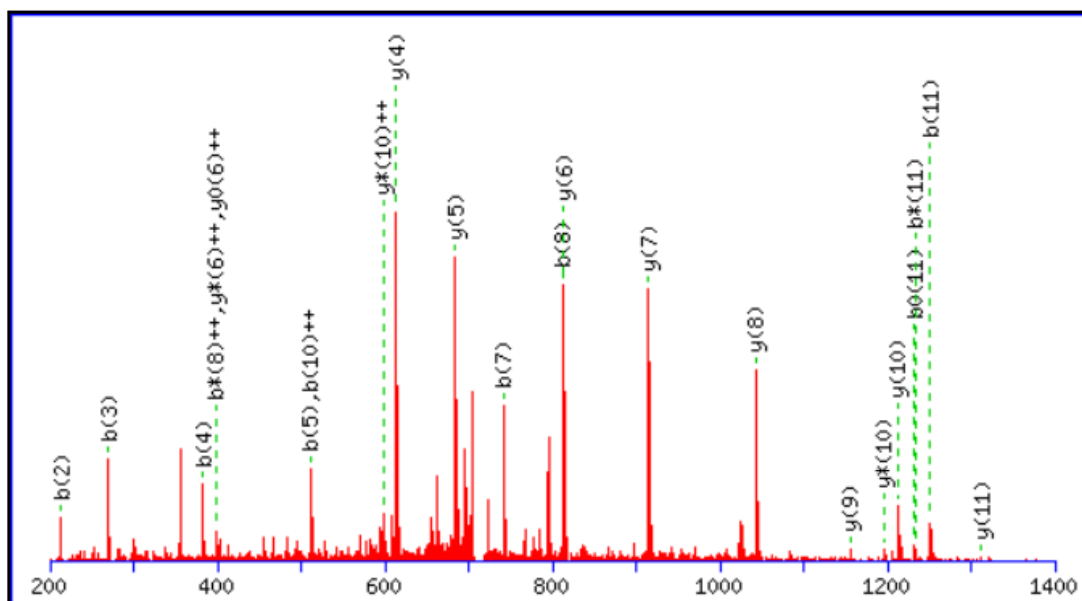

Monoisotopic mass of neutral peptide  $M_r(\text{calc})$ : 1423.80

Variable modifications:

K11 : Succinyl (K)

Ions Score: 60 Expect: 8.5e-005

| #  | b              | b <sup>++</sup> | b*             | b <sup>*++</sup> | b <sup>0</sup> | b <sup>0++</sup> | Seq. | y              | y <sup>++</sup> | y*             | y <sup>*++</sup> | y <sup>0</sup> | y <sup>0++</sup> | #  |
|----|----------------|-----------------|----------------|------------------|----------------|------------------|------|----------------|-----------------|----------------|------------------|----------------|------------------|----|
| 1  | 114.09         | 57.55           |                |                  |                |                  | I    |                |                 |                |                  |                |                  | 12 |
| 2  | <b>213.16</b>  | 107.08          |                |                  |                |                  | V    | <b>1311.73</b> | 656.37          | 1294.70        | 647.85           | 1293.72        | 647.36           | 11 |
| 3  | <b>270.18</b>  | 135.59          |                |                  |                |                  | G    | <b>1212.66</b> | 606.83          | <b>1195.63</b> | <b>598.32</b>    | 1194.65        | 597.83           | 10 |
| 4  | <b>383.27</b>  | 192.14          |                |                  |                |                  | L    | <b>1155.64</b> | 578.32          | 1138.61        | 569.81           | 1137.63        | 569.32           | 9  |
| 5  | <b>511.32</b>  | 256.17          | 494.30         | 247.65           |                |                  | Q    | <b>1042.55</b> | 521.78          | 1025.53        | 513.27           | 1024.54        | 512.77           | 8  |
| 6  | 612.37         | 306.69          | 595.34         | 298.18           | 594.36         | 297.68           | T    | <b>914.49</b>  | 457.75          | 897.47         | 449.24           | 896.48         | 448.75           | 7  |
| 7  | <b>741.41</b>  | 371.21          | 724.39         | 362.70           | 723.40         | 362.21           | E    | <b>813.45</b>  | 407.23          | 796.42         | <b>398.71</b>    | 795.44         | <b>398.22</b>    | 6  |
| 8  | <b>812.45</b>  | 406.73          | 795.42         | <b>398.22</b>    | 794.44         | 397.72           | A    | <b>684.40</b>  | 342.71          | 667.38         | 334.19           |                |                  | 5  |
| 9  | 909.50         | 455.26          | 892.48         | 446.74           | 891.49         | 446.25           | P    | <b>613.37</b>  | 307.19          | 596.34         | 298.67           |                |                  | 4  |
| 10 | 1022.59        | <b>511.80</b>   | 1005.56        | 503.28           | 1004.58        | 502.79           | L    | 516.31         | 258.66          | 499.29         | 250.15           |                |                  | 3  |
| 11 | <b>1250.70</b> | 625.85          | <b>1233.67</b> | 617.34           | <b>1232.69</b> | 616.85           | K    | 403.23         | 202.12          | 386.20         | 193.61           |                |                  | 2  |
| 12 |                |                 |                |                  |                |                  | R    | 175.12         | 88.06           | 158.09         | 79.55            |                |                  | 1  |

# pyruvate formate lyase I K117

## ALIPFGGI<sup>Succ</sup>KMIEGSCK

MS/MS Fragmentation of **ALIPFGGIKMIEGSCK**

Found in **gi170080561**, pyruvate formate lyase I [Escherichia coli str. K-12 substr. DE]

Match to Query 7430: 1819.929724 from(910.972138,2+)

From data file zzh61.dta

Click mouse within plot area to zoom in by factor of two about that point

Or,   to  Da

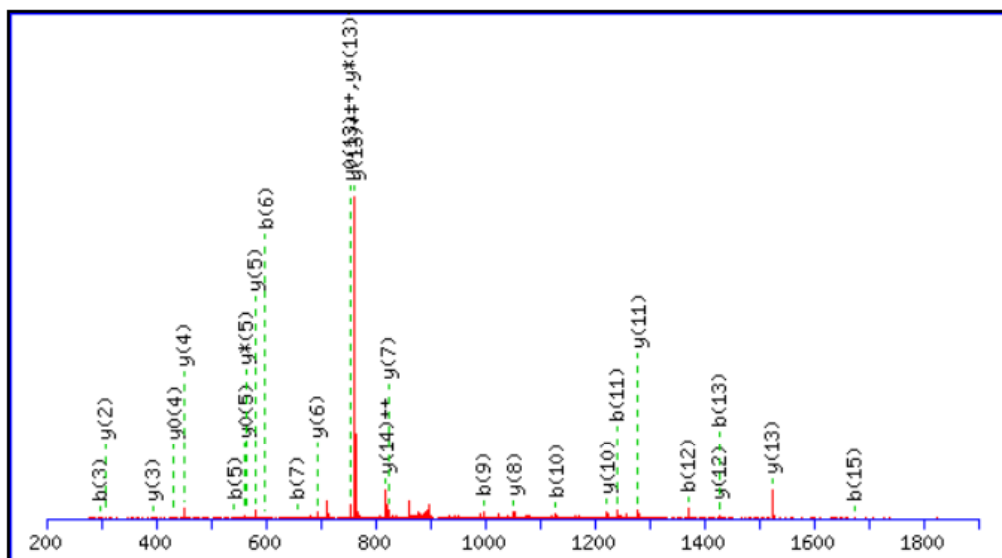

Monoisotopic mass of neutral peptide Mr(calc): 1819.92

Variable modifications:

K9 : Succinyl (K)

C15 : Carbamidomethyl (C)

Ions Score: 54 Expect: 0.00026

| #  | b              | b <sup>++</sup> | b*      | b <sup>*++</sup> | b <sup>0</sup> | b <sup>0++</sup> | Seq. | y              | y <sup>++</sup> | y*            | y <sup>*++</sup> | y <sup>0</sup> | y <sup>0++</sup> | #  |
|----|----------------|-----------------|---------|------------------|----------------|------------------|------|----------------|-----------------|---------------|------------------|----------------|------------------|----|
| 1  | 72.04          | 36.53           |         |                  |                |                  | A    |                |                 |               |                  |                |                  | 16 |
| 2  | 185.13         | 93.07           |         |                  |                |                  | L    | 1749.89        | 875.45          | 1732.86       | 866.94           | 1731.88        | 866.44           | 15 |
| 3  | <b>298.21</b>  | 149.61          |         |                  |                |                  | I    | 1636.81        | <b>818.91</b>   | 1619.78       | 810.39           | 1618.80        | 809.90           | 14 |
| 4  | 395.27         | 198.14          |         |                  |                |                  | P    | <b>1523.72</b> | <b>762.37</b>   | 1506.70       | <b>753.85</b>    | 1505.71        | <b>753.36</b>    | 13 |
| 5  | <b>542.33</b>  | 271.67          |         |                  |                |                  | F    | <b>1426.67</b> | 713.84          | 1409.64       | 705.33           | 1408.66        | 704.83           | 12 |
| 6  | <b>599.36</b>  | 300.18          |         |                  |                |                  | G    | <b>1279.60</b> | 640.30          | 1262.58       | 631.79           | 1261.59        | 631.30           | 11 |
| 7  | <b>656.38</b>  | 328.69          |         |                  |                |                  | G    | <b>1222.58</b> | 611.79          | 1205.55       | 603.28           | 1204.57        | 602.79           | 10 |
| 8  | 769.46         | 385.23          |         |                  |                |                  | I    | 1165.56        | 583.28          | 1148.53       | 574.77           | 1147.55        | 574.28           | 9  |
| 9  | <b>997.57</b>  | 499.29          | 980.55  | 490.78           |                |                  | K    | <b>1052.48</b> | 526.74          | 1035.45       | 518.23           | 1034.46        | 517.74           | 8  |
| 10 | <b>1128.61</b> | 564.81          | 1111.59 | 556.30           |                |                  | M    | <b>824.36</b>  | 412.69          | 807.34        | 404.17           | 806.35         | 403.68           | 7  |
| 11 | <b>1241.70</b> | 621.35          | 1224.67 | 612.84           |                |                  | I    | <b>693.32</b>  | 347.17          | 676.30        | 338.65           | 675.31         | 338.16           | 6  |
| 12 | <b>1370.74</b> | 685.87          | 1353.71 | 677.36           | 1352.73        | 676.87           | E    | <b>580.24</b>  | 290.62          | <b>563.21</b> | 282.11           | <b>562.23</b>  | 281.62           | 5  |
| 13 | <b>1427.76</b> | 714.38          | 1410.73 | 705.87           | 1409.75        | 705.38           | G    | <b>451.20</b>  | 226.10          | 434.17        | 217.59           | <b>433.19</b>  | 217.10           | 4  |
| 14 | 1514.79        | 757.90          | 1497.77 | 749.39           | 1496.78        | 748.89           | S    | <b>394.18</b>  | 197.59          | 377.15        | 189.08           | 376.16         | 188.59           | 3  |
| 15 | <b>1674.82</b> | 837.92          | 1657.80 | 829.40           | 1656.81        | 828.91           | C    | <b>307.14</b>  | 154.08          | 290.12        | 145.56           |                |                  | 2  |
| 16 |                |                 |         |                  |                |                  | K    | 147.11         | 74.06           | 130.09        | 65.55            |                |                  | 1  |

# pyruvate formate lyase I K124

## MIEGSC<sup>Succ</sup>KAYNR

MS/MS Fragmentation of **MIEGSKAYNR**

Found in **gi170080561**, pyruvate formate lyase I [Escherichia coli str. K-12 substr. DH1

Match to Query 5602: 1427.623204 from(714.818878,2+)

From data file zzh61.dta

Click mouse within plot area to zoom in by factor of two about that point

Or,   to  Da

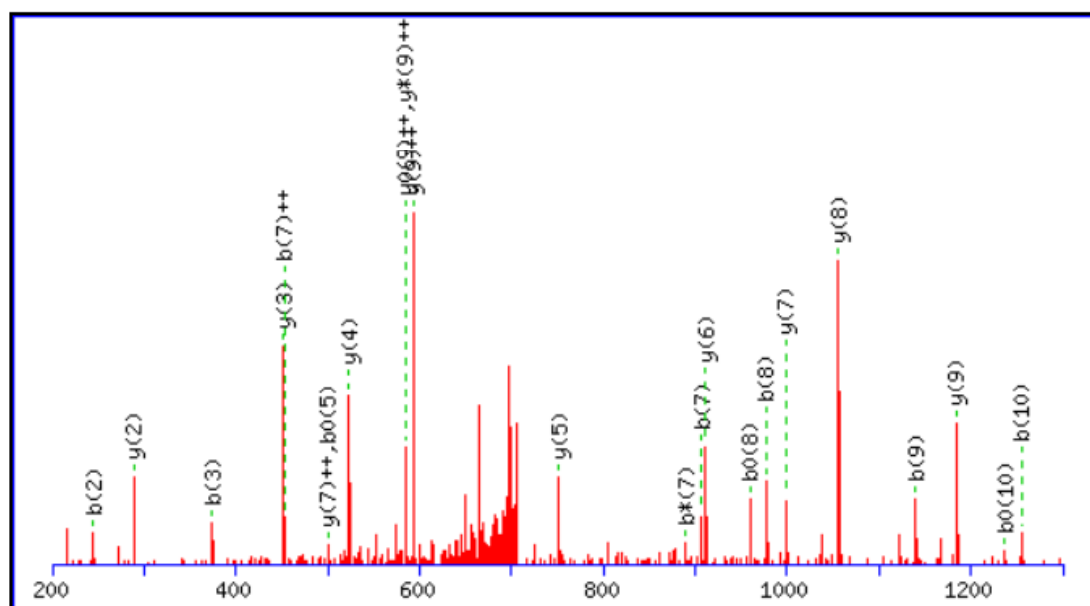

Monoisotopic mass of neutral peptide  $M_r(\text{calc})$ : 1427.62

Variable modifications:

C6 : Carbamidomethyl (C)

K7 : Succinyl (K)

Ions Score: 54 Expect: 0.00025

| #  | b              | b <sup>++</sup> | b*            | b* <sup>++</sup> | b <sup>0</sup> | b <sup>0++</sup> | Seq. | y              | y <sup>++</sup> | y*      | y* <sup>++</sup> | y <sup>0</sup> | y <sup>0++</sup> | #  |
|----|----------------|-----------------|---------------|------------------|----------------|------------------|------|----------------|-----------------|---------|------------------|----------------|------------------|----|
| 1  | 132.05         | 66.53           |               |                  |                |                  | M    |                |                 |         |                  |                |                  | 11 |
| 2  | <b>245.13</b>  | 123.07          |               |                  |                |                  | I    | 1297.58        | 649.30          | 1280.56 | 640.78           | 1279.57        | 640.29           | 10 |
| 3  | <b>374.17</b>  | 187.59          |               |                  | 356.16         | 178.59           | E    | <b>1184.50</b> | <b>592.75</b>   | 1167.47 | <b>584.24</b>    | 1166.49        | <b>583.75</b>    | 9  |
| 4  | 431.20         | 216.10          |               |                  | 413.19         | 207.10           | G    | <b>1055.46</b> | 528.23          | 1038.43 | 519.72           | 1037.45        | 519.23           | 8  |
| 5  | 518.23         | 259.62          |               |                  | <b>500.22</b>  | 250.61           | S    | <b>998.44</b>  | <b>499.72</b>   | 981.41  | 491.21           | 980.43         | 490.72           | 7  |
| 6  | 678.26         | 339.63          |               |                  | 660.25         | 330.63           | C    | <b>911.40</b>  | 456.21          | 894.38  | 447.69           |                |                  | 6  |
| 7  | <b>906.37</b>  | <b>453.69</b>   | <b>889.34</b> | 445.18           | 888.36         | 444.68           | K    | <b>751.37</b>  | 376.19          | 734.35  | 367.68           |                |                  | 5  |
| 8  | <b>977.41</b>  | 489.21          | 960.38        | 480.69           | <b>959.40</b>  | 480.20           | A    | <b>523.26</b>  | 262.13          | 506.24  | 253.62           |                |                  | 4  |
| 9  | <b>1140.47</b> | 570.74          | 1123.44       | 562.23           | 1122.46        | 561.73           | Y    | <b>452.23</b>  | 226.62          | 435.20  | 218.10           |                |                  | 3  |
| 10 | <b>1254.51</b> | 627.76          | 1237.49       | 619.25           | <b>1236.50</b> | 618.75           | N    | <b>289.16</b>  | 145.08          | 272.14  | 136.57           |                |                  | 2  |
| 11 |                |                 |               |                  |                |                  | R    | 175.12         | 88.06           | 158.09  | 79.55            |                |                  | 1  |

# pyruvate formate lyase I K195

## VALYGIDYLM<sup>Succ</sup>KDK

MS/MS Fragmentation of **VALYGIDYLMKDK**

Found in **gi170080561**, pyruvate formate lyase I [Escherichia coli str. K-12 substr. DE

Match to Query 11365: 1627.818764 from(814.916658,2+)

From data file xie021.dta

Click mouse within plot area to zoom in by factor of two about that point

Or,   to  Da

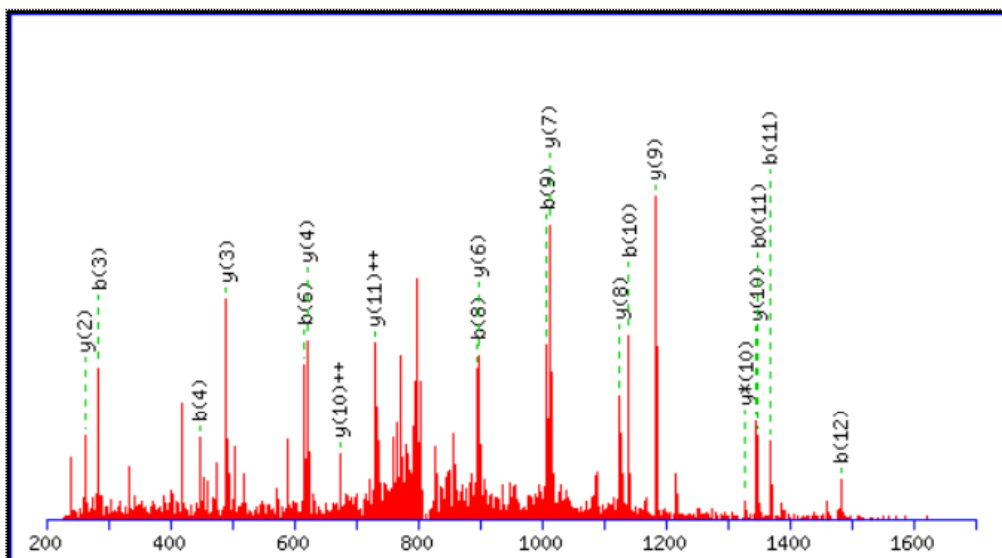

Monoisotopic mass of neutral peptide  $M_r(\text{calc})$ : 1627.82

Variable modifications:

K11 : succinyl (K)

Ions Score: 49 Expect: 0.0015

| #  | b              | b <sup>++</sup> | b <sup>*</sup> | b <sup>*++</sup> | b <sup>0</sup> | b <sup>0++</sup> | Seq. | y              | y <sup>++</sup> | y <sup>*</sup> | y <sup>*++</sup> | y <sup>0</sup> | y <sup>0++</sup> | #  |
|----|----------------|-----------------|----------------|------------------|----------------|------------------|------|----------------|-----------------|----------------|------------------|----------------|------------------|----|
| 1  | 100.08         | 50.54           |                |                  |                |                  | V    |                |                 |                |                  |                |                  | 13 |
| 2  | 171.11         | 86.06           |                |                  |                |                  | A    | 1529.76        | 765.38          | 1512.73        | 756.87           | 1511.75        | 756.38           | 12 |
| 3  | <b>284.20</b>  | 142.60          |                |                  |                |                  | L    | 1458.72        | <b>729.86</b>   | 1441.69        | 721.35           | 1440.71        | 720.86           | 11 |
| 4  | <b>447.26</b>  | 224.13          |                |                  |                |                  | Y    | <b>1345.63</b> | <b>673.32</b>   | <b>1328.61</b> | 664.81           | 1327.62        | 664.32           | 10 |
| 5  | 504.28         | 252.64          |                |                  |                |                  | G    | <b>1182.57</b> | 591.79          | 1165.54        | 583.28           | 1164.56        | 582.78           | 9  |
| 6  | <b>617.37</b>  | 309.19          |                |                  |                |                  | I    | <b>1125.55</b> | 563.28          | 1108.52        | 554.77           | 1107.54        | 554.27           | 8  |
| 7  | 732.39         | 366.70          |                |                  | 714.38         | 357.69           | D    | <b>1012.47</b> | 506.74          | 995.44         | 498.22           | 994.45         | 497.73           | 7  |
| 8  | <b>895.46</b>  | 448.23          |                |                  | 877.45         | 439.23           | Y    | <b>897.44</b>  | 449.22          | 880.41         | 440.71           | 879.43         | 440.22           | 6  |
| 9  | <b>1008.54</b> | 504.77          |                |                  | 990.53         | 495.77           | L    | 734.38         | 367.69          | 717.35         | 359.18           | 716.36         | 358.69           | 5  |
| 10 | <b>1139.58</b> | 570.29          |                |                  | 1121.57        | 561.29           | M    | <b>621.29</b>  | 311.15          | 604.26         | 302.64           | 603.28         | 302.14           | 4  |
| 11 | <b>1367.69</b> | 684.35          | 1350.66        | 675.84           | <b>1349.68</b> | 675.34           | K    | <b>490.25</b>  | 245.63          | 473.22         | 237.12           | 472.24         | 236.62           | 3  |
| 12 | <b>1482.72</b> | 741.86          | 1465.69        | 733.35           | 1464.71        | 732.86           | D    | <b>262.14</b>  | 131.57          | 245.11         | 123.06           | 244.13         | 122.57           | 2  |
| 13 |                |                 |                |                  |                |                  | K    | 147.11         | 74.06           | 130.09         | 65.55            |                |                  | 1  |

# pyruvate formate lyase I K454

## TMLYAINGGVDE<sup>Succ</sup>KLK

MS/MS Fragmentation of **TMLYAINGGVDEKLK**

Found in **gi170080561**, pyruvate formate lyase I [Escherichia coli str. K-12 substr. DH10B]

Match to Query 7112: 1751.893594 from(876.954073,2+)

From data file zzh61.dta

Click mouse within plot area to zoom in by factor of two about that point

Or,   to  Da

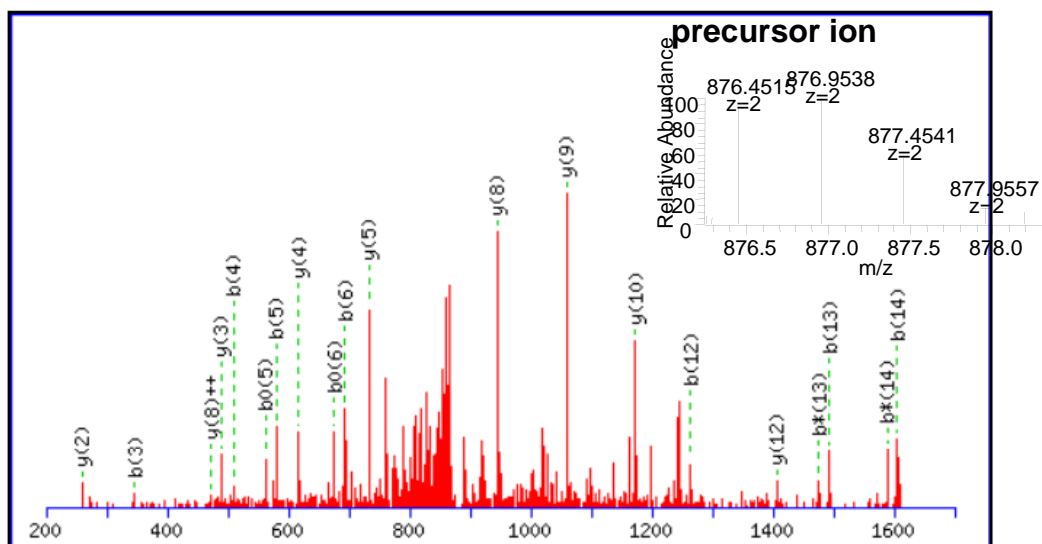

Monoisotopic mass of neutral peptide  $M_r(\text{calc})$ : 1750.88

Variable modifications:

K13 : Succinyl (K)

Ions Score: 55 Expect: 0.00021

| #  | b              | b <sup>++</sup> | b*             | b <sup>*++</sup> | b <sup>0</sup> | b <sup>0++</sup> | Seq. | y              | y <sup>++</sup> | y*      | y <sup>*++</sup> | y <sup>0</sup> | y <sup>0++</sup> | #  |
|----|----------------|-----------------|----------------|------------------|----------------|------------------|------|----------------|-----------------|---------|------------------|----------------|------------------|----|
| 1  | 102.05         | 51.53           |                |                  | 84.04          | 42.53            | T    |                |                 |         |                  |                |                  | 15 |
| 2  | 233.10         | 117.05          |                |                  | 215.08         | 108.05           | M    | 1650.84        | 825.92          | 1633.81 | 817.41           | 1632.83        | 816.92           | 14 |
| 3  | <b>346.18</b>  | 173.59          |                |                  | 328.17         | 164.59           | L    | 1519.80        | 760.40          | 1502.77 | 751.89           | 1501.79        | 751.40           | 13 |
| 4  | <b>509.24</b>  | 255.13          |                |                  | 491.23         | 246.12           | Y    | <b>1406.72</b> | 703.86          | 1389.69 | 695.35           | 1388.71        | 694.86           | 12 |
| 5  | <b>580.28</b>  | 290.64          |                |                  | <b>562.27</b>  | 281.64           | A    | 1243.65        | 622.33          | 1226.63 | 613.82           | 1225.64        | 613.32           | 11 |
| 6  | <b>693.36</b>  | 347.19          |                |                  | <b>675.35</b>  | 338.18           | I    | <b>1172.62</b> | 586.81          | 1155.59 | 578.30           | 1154.61        | 577.81           | 10 |
| 7  | 807.41         | 404.21          | 790.38         | 395.69           | 789.40         | 395.20           | N    | <b>1059.53</b> | 530.27          | 1042.51 | 521.76           | 1041.52        | 521.26           | 9  |
| 8  | 864.43         | 432.72          | 847.40         | 424.20           | 846.42         | 423.71           | G    | <b>945.49</b>  | <b>473.25</b>   | 928.46  | 464.73           | 927.48         | 464.24           | 8  |
| 9  | 921.45         | 461.23          | 904.42         | 452.72           | 903.44         | 452.22           | G    | 888.47         | 444.74          | 871.44  | 436.22           | 870.46         | 435.73           | 7  |
| 10 | 1020.52        | 510.76          | 1003.49        | 502.25           | 1002.51        | 501.76           | V    | 831.45         | 416.23          | 814.42  | 407.71           | 813.44         | 407.22           | 6  |
| 11 | 1135.55        | 568.28          | 1118.52        | 559.76           | 1117.53        | 559.27           | D    | <b>732.38</b>  | 366.69          | 715.35  | 358.18           | 714.37         | 357.69           | 5  |
| 12 | <b>1264.59</b> | 632.80          | 1247.56        | 624.28           | 1246.58        | 623.79           | E    | <b>617.35</b>  | 309.18          | 600.32  | 300.67           | 599.34         | 300.17           | 4  |
| 13 | <b>1492.70</b> | 746.85          | <b>1475.67</b> | 738.34           | 1474.69        | 737.85           | K    | <b>488.31</b>  | 244.66          | 471.28  | 236.14           |                |                  | 3  |
| 14 | <b>1605.78</b> | 803.40          | <b>1588.76</b> | 794.88           | 1587.77        | 794.39           | L    | <b>260.20</b>  | 130.60          | 243.17  | 122.09           |                |                  | 2  |
| 15 |                |                 |                |                  |                |                  | K    | 147.11         | 74.06           | 130.09  | 65.55            |                |                  | 1  |

# pyruvate formate lyase I K467

## SEPI<sup>Succ</sup>KGDVLNYDEVMER

MS/MS Fragmentation of **SEPIKGDVLNYDEVMER**

Found in **gi|170080561**, pyruvate formate lyase I [Escherichia coli str. K-12 substr. DH10B]

Match to Query 15447: 2092.963294 from(1047.488923,2+)

From data file xie021.dta

Click mouse within plot area to zoom in by factor of two about that point

Or,   to  Da

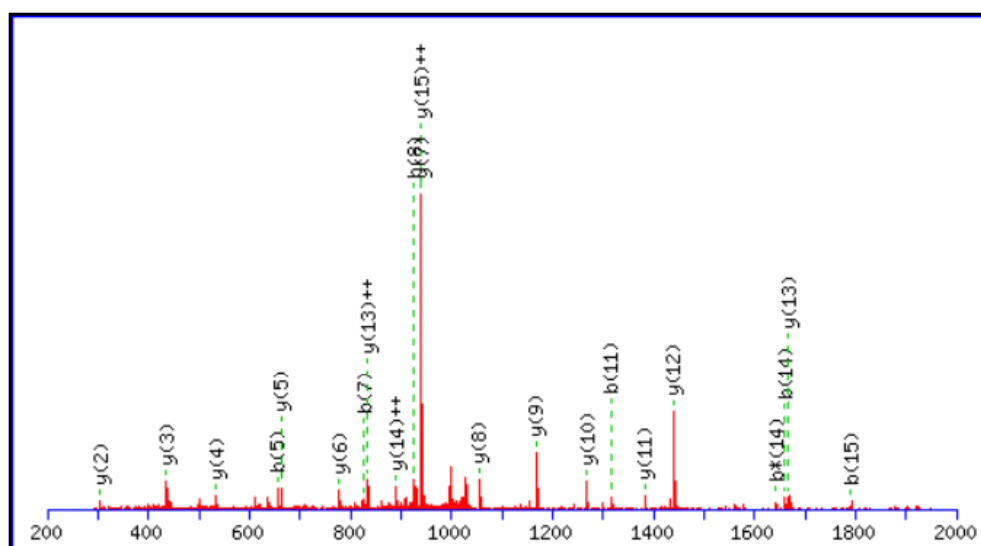

Monoisotopic mass of neutral peptide  $M_r(\text{calc})$ : 2092.96

Variable modifications:

K5 : Succinyl (K)

Ions Score: 57 Expect: 0.00028

| #  | b              | b <sup>++</sup> | b*             | b <sup>++</sup> * | b <sup>0</sup> | b <sup>0++</sup> | Seq. | y              | y <sup>++</sup> | y*      | y <sup>++</sup> * | y <sup>0</sup> | y <sup>0++</sup> | #  |
|----|----------------|-----------------|----------------|-------------------|----------------|------------------|------|----------------|-----------------|---------|-------------------|----------------|------------------|----|
| 1  | 88.04          | 44.52           |                |                   | 70.03          | 35.52            | S    |                |                 |         |                   |                |                  | 17 |
| 2  | 217.08         | 109.04          |                |                   | 199.07         | 100.04           | E    | 2006.94        | 1003.97         | 1989.91 | 995.46            | 1988.93        | 994.97           | 16 |
| 3  | 314.13         | 157.57          |                |                   | 296.12         | 148.57           | P    | 1877.89        | <b>939.45</b>   | 1860.87 | 930.94            | 1859.88        | 930.45           | 15 |
| 4  | 427.22         | 214.11          |                |                   | 409.21         | 205.11           | I    | 1780.84        | <b>890.92</b>   | 1763.82 | 882.41            | 1762.83        | 881.92           | 14 |
| 5  | <b>655.33</b>  | 328.17          | 638.30         | 319.66            | 637.32         | 319.16           | K    | <b>1667.76</b> | <b>834.38</b>   | 1650.73 | 825.87            | 1649.75        | 825.38           | 13 |
| 6  | 712.35         | 356.68          | 695.32         | 348.17            | 694.34         | 347.67           | G    | <b>1439.65</b> | 720.33          | 1422.62 | 711.81            | 1421.64        | 711.32           | 12 |
| 7  | <b>827.38</b>  | 414.19          | 810.35         | 405.68            | 809.37         | 405.19           | D    | <b>1382.63</b> | 691.82          | 1365.60 | 683.30            | 1364.62        | 682.81           | 11 |
| 8  | <b>926.45</b>  | 463.73          | 909.42         | 455.21            | 908.44         | 454.72           | V    | <b>1267.60</b> | 634.30          | 1250.57 | 625.79            | 1249.59        | 625.30           | 10 |
| 9  | 1039.53        | 520.27          | 1022.50        | 511.76            | 1021.52        | 511.26           | L    | <b>1168.53</b> | 584.77          | 1151.50 | 576.26            | 1150.52        | 575.76           | 9  |
| 10 | 1153.57        | 577.29          | 1136.55        | 568.78            | 1135.56        | 568.29           | N    | <b>1055.45</b> | 528.23          | 1038.42 | 519.71            | 1037.44        | 519.22           | 8  |
| 11 | <b>1316.64</b> | 658.82          | 1299.61        | 650.31            | 1298.63        | 649.82           | Y    | <b>941.40</b>  | 471.21          | 924.38  | 462.69            | 923.39         | 462.20           | 7  |
| 12 | 1431.66        | 716.34          | 1414.64        | 707.82            | 1413.65        | 707.33           | D    | <b>778.34</b>  | 389.67          | 761.31  | 381.16            | 760.33         | 380.67           | 6  |
| 13 | 1560.71        | 780.86          | 1543.68        | 772.34            | 1542.70        | 771.85           | E    | <b>663.31</b>  | 332.16          | 646.29  | 323.65            | 645.30         | 323.15           | 5  |
| 14 | <b>1659.77</b> | 830.39          | <b>1642.75</b> | 821.88            | 1641.76        | 821.39           | V    | <b>534.27</b>  | 267.64          | 517.24  | 259.13            | 516.26         | 258.63           | 4  |
| 15 | <b>1790.82</b> | 895.91          | 1773.79        | 887.40            | 1772.80        | 886.91           | M    | <b>435.20</b>  | 218.10          | 418.18  | 209.59            | 417.19         | 209.10           | 3  |
| 16 | 1919.86        | 960.43          | 1902.83        | 951.92            | 1901.85        | 951.43           | E    | <b>304.16</b>  | 152.58          | 287.13  | 144.07            | 286.15         | 143.58           | 2  |
| 17 |                |                 |                |                   |                |                  | R    | 175.12         | 88.06           | 158.09  | 79.55             |                |                  | 1  |

# pyruvate formate lyase I K654

## GAVASLTSVA<sup>Succ</sup>KLPFAYAK

MS/MS Fragmentation of **GAVASLTSVAKLPFAYAK**

Found in [gi|170080561](#), pyruvate formate lyase I [Escherichia coli str. K-12 substr. DH

Match to Query 14402: 1893.022744 from(947.518648,2+)

From data file xie021.dta

Click mouse within plot area to zoom in by factor of two about that point

Or,   to  Da

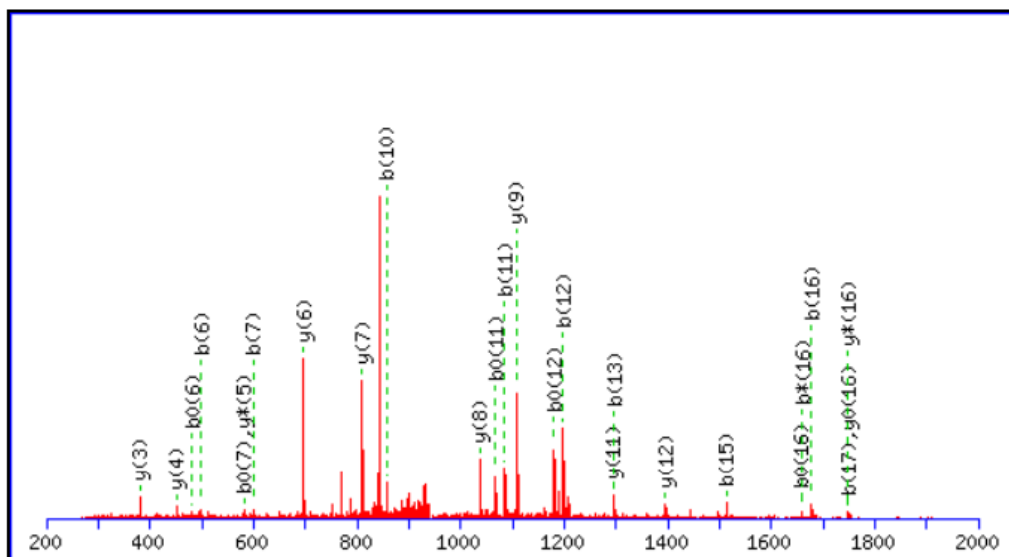

Monoisotopic mass of neutral peptide  $M_r(\text{calc})$ : 1893.02

Variable modifications:

K11 : Succinyl (K)

Ions Score: 46 Expect: 0.0032

| #  | b              | b <sup>++</sup> | b*             | b <sup>*++</sup> | b <sup>0</sup> | b <sup>0++</sup> | Seq. | y              | y <sup>++</sup> | y*             | y <sup>*++</sup> | y <sup>0</sup> | y <sup>0++</sup> | #  |
|----|----------------|-----------------|----------------|------------------|----------------|------------------|------|----------------|-----------------|----------------|------------------|----------------|------------------|----|
| 1  | 58.03          | 29.52           |                |                  |                |                  | G    |                |                 |                |                  |                |                  | 18 |
| 2  | 129.07         | 65.04           |                |                  |                |                  | A    | 1837.01        | 919.01          | 1819.98        | 910.50           | 1819.00        | 910.00           | 17 |
| 3  | 228.13         | 114.57          |                |                  |                |                  | V    | 1765.97        | 883.49          | <b>1748.95</b> | 874.98           | <b>1747.96</b> | 874.49           | 16 |
| 4  | 299.17         | 150.09          |                |                  |                |                  | A    | 1666.91        | 833.96          | 1649.88        | 825.44           | 1648.89        | 824.95           | 15 |
| 5  | 386.20         | 193.61          |                |                  | 368.19         | 184.60           | S    | 1595.87        | 798.44          | 1578.84        | 789.92           | 1577.86        | 789.43           | 14 |
| 6  | <b>499.29</b>  | 250.15          |                |                  | <b>481.28</b>  | 241.14           | L    | 1508.84        | 754.92          | 1491.81        | 746.41           | 1490.83        | 745.92           | 13 |
| 7  | <b>600.34</b>  | 300.67          |                |                  | <b>582.32</b>  | 291.67           | T    | <b>1395.75</b> | 698.38          | 1378.73        | 689.87           | 1377.74        | 689.37           | 12 |
| 8  | 687.37         | 344.19          |                |                  | 669.36         | 335.18           | S    | <b>1294.70</b> | 647.86          | 1277.68        | 639.34           | 1276.69        | 638.85           | 11 |
| 9  | 786.44         | 393.72          |                |                  | 768.43         | 384.72           | V    | 1207.67        | 604.34          | 1190.65        | 595.83           |                |                  | 10 |
| 10 | <b>857.47</b>  | 429.24          |                |                  | 839.46         | 420.23           | A    | <b>1108.60</b> | 554.81          | 1091.58        | 546.29           |                |                  | 9  |
| 11 | <b>1085.58</b> | 543.30          | 1068.56        | 534.78           | <b>1067.57</b> | 534.29           | K    | <b>1037.57</b> | 519.29          | 1020.54        | 510.77           |                |                  | 8  |
| 12 | <b>1198.67</b> | 599.84          | 1181.64        | 591.32           | <b>1180.66</b> | 590.83           | L    | <b>809.46</b>  | 405.23          | 792.43         | 396.72           |                |                  | 7  |
| 13 | <b>1295.72</b> | 648.36          | 1278.69        | 639.85           | 1277.71        | 639.36           | P    | <b>696.37</b>  | 348.69          | 679.34         | 340.18           |                |                  | 6  |
| 14 | 1442.79        | 721.90          | 1425.76        | 713.38           | 1424.78        | 712.89           | F    | 599.32         | 300.16          | <b>582.29</b>  | 291.65           |                |                  | 5  |
| 15 | <b>1513.83</b> | 757.42          | 1496.80        | 748.90           | 1495.82        | 748.41           | A    | <b>452.25</b>  | 226.63          | 435.22         | 218.12           |                |                  | 4  |
| 16 | <b>1676.89</b> | 838.95          | <b>1659.86</b> | 830.44           | <b>1658.88</b> | 829.94           | Y    | <b>381.21</b>  | 191.11          | 364.19         | 182.60           |                |                  | 3  |
| 17 | <b>1747.93</b> | 874.47          | 1730.90        | 865.95           | 1729.92        | 865.46           | A    | 218.15         | 109.58          | 201.12         | 101.07           |                |                  | 2  |
| 18 |                |                 |                |                  |                |                  | K    | 147.11         | 74.06           | 130.09         | 65.55            |                |                  | 1  |



# 50S ribosomal subunit protein L1 K105

**AAGAELVGMEDLADQI<sup>Succ</sup>KK**

MS/MS Fragmentation of **AAGAELVGMEDLADQIKK**

Found in [gi|170083444](#), 50S ribosomal subunit protein L1 [Escherichia coli str. K-12 sub

Match to Query 14839: 1957.966954 from(979.990753,2+)

From data file xie021.dta

Click mouse within plot area to zoom in by factor of two about that point

Or,   to  Da

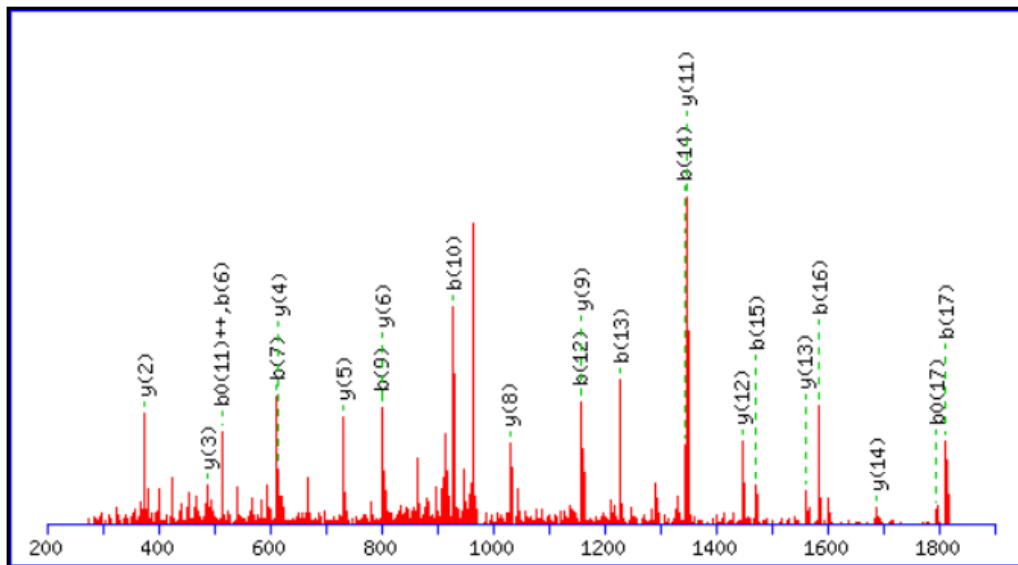

Monoisotopic mass of neutral peptide  $M_r(\text{calc})$ : 1957.97

Variable modifications:

K17 : Succinyl (K)

Ions Score: 73 Expect: 7e-006

| #  | b              | b <sup>++</sup> | b*      | b <sup>*++</sup> | b <sup>0</sup> | b <sup>0++</sup> | Seq. | y              | y <sup>++</sup> | y*      | y <sup>*++</sup> | y <sup>0</sup> | y <sup>0++</sup> | #  |
|----|----------------|-----------------|---------|------------------|----------------|------------------|------|----------------|-----------------|---------|------------------|----------------|------------------|----|
| 1  | 72.04          | 36.53           |         |                  |                |                  | A    |                |                 |         |                  |                |                  | 18 |
| 2  | 143.08         | 72.04           |         |                  |                |                  | A    | 1887.94        | 944.47          | 1870.91 | 935.96           | 1869.93        | 935.47           | 17 |
| 3  | 200.10         | 100.56          |         |                  |                |                  | G    | 1816.90        | 908.95          | 1799.87 | 900.44           | 1798.89        | 899.95           | 16 |
| 4  | 271.14         | 136.07          |         |                  |                |                  | A    | 1759.88        | 880.44          | 1742.85 | 871.93           | 1741.87        | 871.44           | 15 |
| 5  | 400.18         | 200.59          |         |                  | 382.17         | 191.59           | E    | <b>1688.84</b> | 844.92          | 1671.81 | 836.41           | 1670.83        | 835.92           | 14 |
| 6  | <b>513.27</b>  | 257.14          |         |                  | 495.26         | 248.13           | L    | <b>1559.80</b> | 780.40          | 1542.77 | 771.89           | 1541.79        | 771.40           | 13 |
| 7  | <b>612.34</b>  | 306.67          |         |                  | 594.32         | 297.67           | V    | <b>1446.71</b> | 723.86          | 1429.69 | 715.35           | 1428.70        | 714.86           | 12 |
| 8  | 669.36         | 335.18          |         |                  | 651.35         | 326.18           | G    | <b>1347.65</b> | 674.33          | 1330.62 | 665.81           | 1329.64        | 665.32           | 11 |
| 9  | <b>800.40</b>  | 400.70          |         |                  | 782.39         | 391.70           | M    | 1290.62        | 645.82          | 1273.60 | 637.30           | 1272.61        | 636.81           | 10 |
| 10 | <b>929.44</b>  | 465.22          |         |                  | 911.43         | 456.22           | E    | <b>1159.58</b> | 580.30          | 1142.56 | 571.78           | 1141.57        | 571.29           | 9  |
| 11 | 1044.47        | 522.74          |         |                  | 1026.46        | <b>513.73</b>    | D    | <b>1030.54</b> | 515.77          | 1013.51 | 507.26           | 1012.53        | 506.77           | 8  |
| 12 | <b>1157.55</b> | 579.28          |         |                  | 1139.54        | 570.27           | L    | 915.51         | 458.26          | 898.49  | 449.75           | 897.50         | 449.26           | 7  |
| 13 | <b>1228.59</b> | 614.80          |         |                  | 1210.58        | 605.79           | A    | <b>802.43</b>  | 401.72          | 785.40  | 393.21           | 784.42         | 392.71           | 6  |
| 14 | <b>1343.61</b> | 672.31          |         |                  | 1325.60        | 663.31           | D    | <b>731.39</b>  | 366.20          | 714.37  | 357.69           | 713.38         | 357.20           | 5  |
| 15 | <b>1471.67</b> | 736.34          | 1454.65 | 727.83           | 1453.66        | 727.33           | Q    | <b>616.37</b>  | 308.69          | 599.34  | 300.17           |                |                  | 4  |
| 16 | <b>1584.76</b> | 792.88          | 1567.73 | 784.37           | 1566.75        | 783.88           | I    | <b>488.31</b>  | 244.66          | 471.28  | 236.14           |                |                  | 3  |
| 17 | <b>1812.87</b> | 906.94          | 1795.84 | 898.42           | <b>1794.86</b> | 897.93           | K    | <b>375.22</b>  | 188.12          | 358.20  | 179.60           |                |                  | 2  |
| 18 |                |                 |         |                  |                |                  | K    | 147.11         | 74.06           | 130.09  | 65.55            |                |                  | 1  |

# 50S ribosomal subunit protein L1 K154

## VGTVTPNVAEAV<sup>Succ</sup>KNAK

MS/MS Fragmentation of **VGTVTPNVAEAVKNAK**

Found in [gi|170083444](#), 50S ribosomal subunit protein L1 [Escherichia coli str. K-12 sut

Match to Query 12332: 1696.900064 from(849.457308,2+)

From data file xie021.dta

Click mouse within plot area to zoom in by factor of two about that point

Or,   to  Da

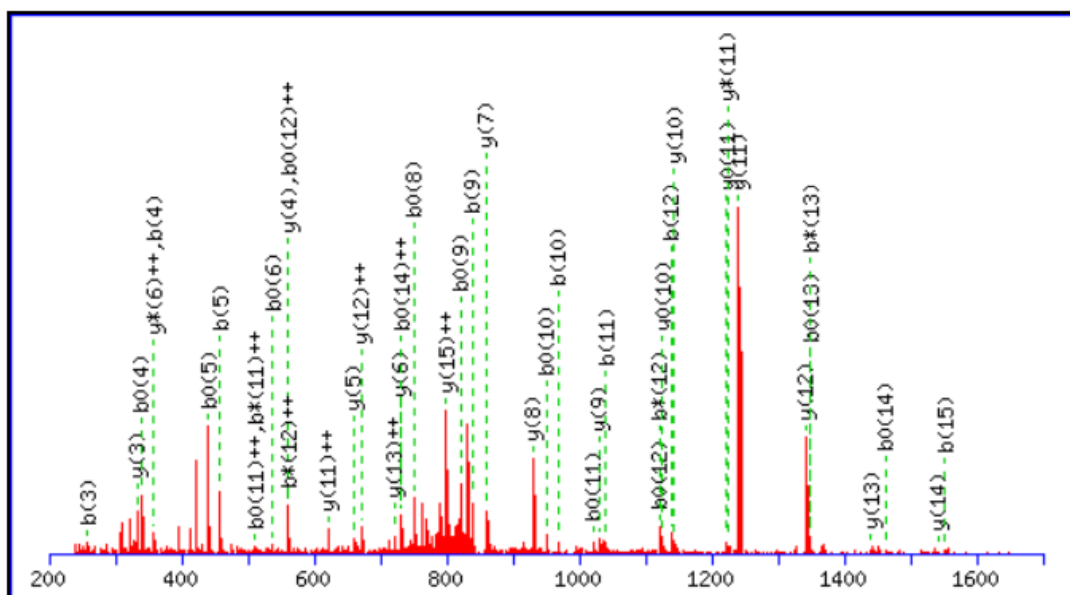

Monoisotopic mass of neutral peptide  $M_r(\text{calc})$ : 1696.90

Variable modifications:

K13 : Succinyl (K)

Ions Score: 50 Expect: 0.001

| #  | b       | b <sup>++</sup> | b*      | b <sup>*++</sup> | b <sup>0</sup> | b <sup>0++</sup> | Seq. | y       | y <sup>++</sup> | y*      | y <sup>*++</sup> | y <sup>0</sup> | y <sup>0++</sup> | #  |
|----|---------|-----------------|---------|------------------|----------------|------------------|------|---------|-----------------|---------|------------------|----------------|------------------|----|
| 1  | 100.08  | 50.54           |         |                  |                |                  | V    |         |                 |         |                  |                |                  | 16 |
| 2  | 157.10  | 79.05           |         |                  |                |                  | G    | 1598.84 | 799.92          | 1581.81 | 791.41           | 1580.83        | 790.92           | 15 |
| 3  | 258.14  | 129.58          |         |                  | 240.13         | 120.57           | T    | 1541.82 | 771.41          | 1524.79 | 762.90           | 1523.81        | 762.41           | 14 |
| 4  | 357.21  | 179.11          |         |                  | 339.20         | 170.10           | V    | 1440.77 | 720.89          | 1423.74 | 712.37           | 1422.76        | 711.88           | 13 |
| 5  | 458.26  | 229.63          |         |                  | 440.25         | 220.63           | T    | 1341.70 | 671.35          | 1324.67 | 662.84           | 1323.69        | 662.35           | 12 |
| 6  | 555.31  | 278.16          |         |                  | 537.30         | 269.16           | P    | 1240.65 | 620.83          | 1223.63 | 612.32           | 1222.64        | 611.82           | 11 |
| 7  | 669.36  | 335.18          | 652.33  | 326.67           | 651.35         | 326.18           | N    | 1143.60 | 572.30          | 1126.57 | 563.79           | 1125.59        | 563.30           | 10 |
| 8  | 768.43  | 384.72          | 751.40  | 376.20           | 750.41         | 375.71           | V    | 1029.56 | 515.28          | 1012.53 | 506.77           | 1011.55        | 506.28           | 9  |
| 9  | 839.46  | 420.23          | 822.44  | 411.72           | 821.45         | 411.23           | A    | 930.49  | 465.75          | 913.46  | 457.23           | 912.48         | 456.74           | 8  |
| 10 | 968.50  | 484.76          | 951.48  | 476.24           | 950.49         | 475.75           | E    | 859.45  | 430.23          | 842.43  | 421.72           | 841.44         | 421.22           | 7  |
| 11 | 1039.54 | 520.27          | 1022.52 | 511.76           | 1021.53        | 511.27           | A    | 730.41  | 365.71          | 713.38  | 357.20           |                |                  | 6  |
| 12 | 1138.61 | 569.81          | 1121.58 | 561.30           | 1120.60        | 560.80           | V    | 659.37  | 330.19          | 642.35  | 321.68           |                |                  | 5  |
| 13 | 1366.72 | 683.86          | 1349.69 | 675.35           | 1348.71        | 674.86           | K    | 560.30  | 280.66          | 543.28  | 272.14           |                |                  | 4  |
| 14 | 1480.76 | 740.89          | 1463.74 | 732.37           | 1462.75        | 731.88           | N    | 332.19  | 166.60          | 315.17  | 158.09           |                |                  | 3  |
| 15 | 1551.80 | 776.40          | 1534.77 | 767.89           | 1533.79        | 767.40           | A    | 218.15  | 109.58          | 201.12  | 101.07           |                |                  | 2  |
| 16 |         |                 |         |                  |                |                  | K    | 147.11  | 74.06           | 130.09  | 65.55            |                |                  | 1  |

# 50S ribosomal subunit protein L1 K186

L<sup>Succ</sup>KENLEALLVALK

MS/MS Fragmentation of **LKENLEALLVALK**

Found in **gi170083444**, 50S ribosomal subunit protein L1 [Escherichia coli str. K-12 su

Match to Query 10546: 1552.907994 from(777.461273,2+)

From data file xie021.dta

Click mouse within plot area to zoom in by factor of two about that point

Or, Plot from  to  Da

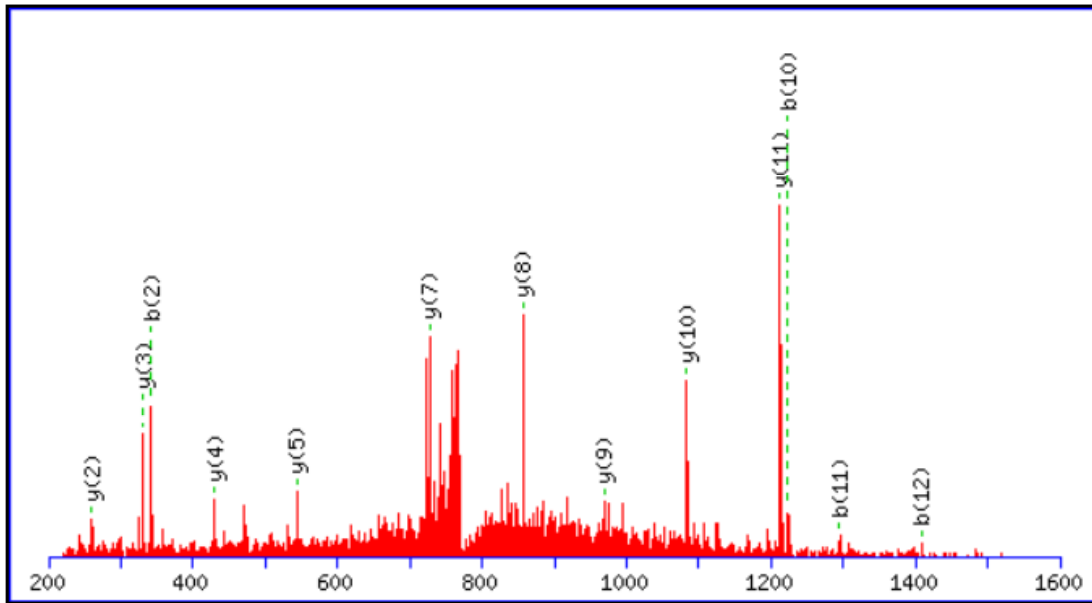

Monoisotopic mass of neutral peptide  $M_r(\text{calc})$ : 1552.91

Variable modifications:

K2 : Succinyl (K)

Ions Score: 69 Expect: 1.1e-005

| #  | b              | b <sup>++</sup> | b*      | b <sup>*++</sup> | b <sup>0</sup> | b <sup>0++</sup> | Seq. | y              | y <sup>++</sup> | y*      | y <sup>*++</sup> | y <sup>0</sup> | y <sup>0++</sup> | #  |
|----|----------------|-----------------|---------|------------------|----------------|------------------|------|----------------|-----------------|---------|------------------|----------------|------------------|----|
| 1  | 114.09         | 57.55           |         |                  |                |                  | L    |                |                 |         |                  |                |                  | 13 |
| 2  | <b>342.20</b>  | 171.60          | 325.18  | 163.09           |                |                  | K    | 1440.83        | 720.92          | 1423.80 | 712.41           | 1422.82        | 711.91           | 12 |
| 3  | 471.24         | 236.13          | 454.22  | 227.61           | 453.23         | 227.12           | E    | <b>1212.72</b> | 606.86          | 1195.69 | 598.35           | 1194.71        | 597.86           | 11 |
| 4  | 585.29         | 293.15          | 568.26  | 284.63           | 567.28         | 284.14           | N    | <b>1083.68</b> | 542.34          | 1066.65 | 533.83           | 1065.67        | 533.34           | 10 |
| 5  | 698.37         | 349.69          | 681.35  | 341.18           | 680.36         | 340.68           | L    | <b>969.63</b>  | 485.32          | 952.61  | 476.81           | 951.62         | 476.32           | 9  |
| 6  | 827.41         | 414.21          | 810.39  | 405.70           | 809.40         | 405.21           | E    | <b>856.55</b>  | 428.78          | 839.52  | 420.27           | 838.54         | 419.77           | 8  |
| 7  | 898.45         | 449.73          | 881.43  | 441.22           | 880.44         | 440.72           | A    | <b>727.51</b>  | 364.26          | 710.48  | 355.74           |                |                  | 7  |
| 8  | 1011.54        | 506.27          | 994.51  | 497.76           | 993.53         | 497.27           | L    | 656.47         | 328.74          | 639.44  | 320.23           |                |                  | 6  |
| 9  | 1124.62        | 562.81          | 1107.59 | 554.30           | 1106.61        | 553.81           | L    | <b>543.39</b>  | 272.20          | 526.36  | 263.68           |                |                  | 5  |
| 10 | <b>1223.69</b> | 612.35          | 1206.66 | 603.83           | 1205.68        | 603.34           | V    | <b>430.30</b>  | 215.65          | 413.28  | 207.14           |                |                  | 4  |
| 11 | <b>1294.73</b> | 647.87          | 1277.70 | 639.35           | 1276.71        | 638.86           | A    | <b>331.23</b>  | 166.12          | 314.21  | 157.61           |                |                  | 3  |
| 12 | <b>1407.81</b> | 704.41          | 1390.78 | 695.90           | 1389.80        | 695.40           | L    | <b>260.20</b>  | 130.60          | 243.17  | 122.09           |                |                  | 2  |
| 13 |                |                 |         |                  |                |                  | K    | 147.11         | 74.06           | 130.09  | 65.55            |                |                  | 1  |

# 50S ribosomal subunit protein L1 K197

## ENLEALLVAL<sup>Succ</sup>KK

MS/MS Fragmentation of **ENLEALLVALKK**

Found in [gi|170083444](#), 50S ribosomal subunit protein L1 [Escherichia coli str. K-12 su]

Match to Query 9003: 1439.825474 from(720.920013,2+)

From data file xie021.dta

Click mouse within plot area to zoom in by factor of two about that point

Or,   to  Da

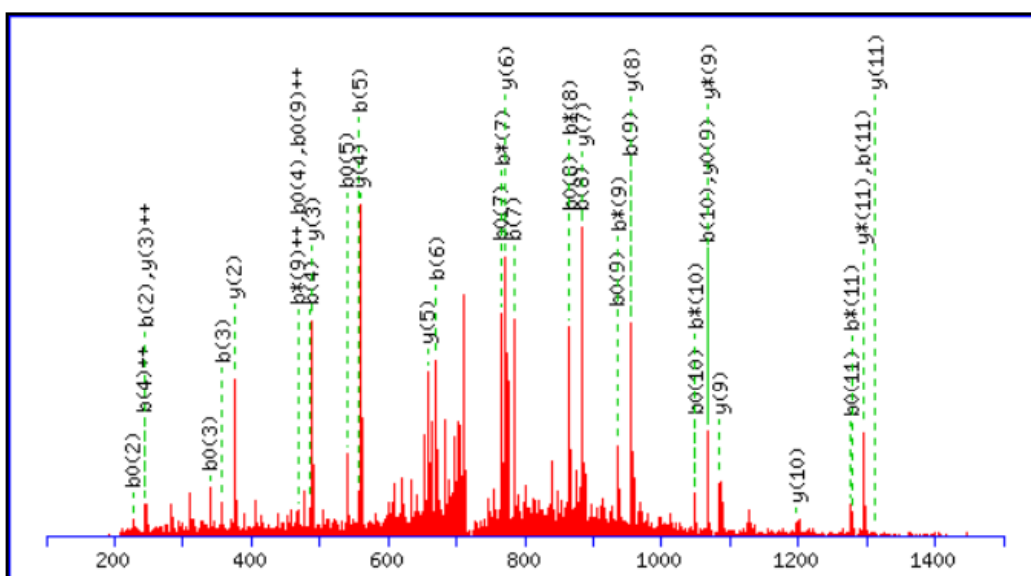

Monoisotopic mass of neutral peptide  $M_r(\text{calc})$ : 1439.82

Variable modifications:

K11 : Succinyl (K)

Ions Score: 52 Expect: 0.00062

| #  | b              | b <sup>++</sup> | b*             | b* <sup>++</sup> | b <sup>0</sup> | b <sup>0++</sup> | Seq. | y              | y <sup>++</sup> | y*             | y* <sup>++</sup> | y <sup>0</sup> | y <sup>0++</sup> | #  |
|----|----------------|-----------------|----------------|------------------|----------------|------------------|------|----------------|-----------------|----------------|------------------|----------------|------------------|----|
| 1  | 130.05         | 65.53           |                |                  | 112.04         | 56.52            | E    |                |                 |                |                  |                |                  | 12 |
| 2  | <b>244.09</b>  | 122.55          | 227.07         | 114.04           | <b>226.08</b>  | 113.54           | N    | <b>1311.79</b> | 656.40          | <b>1294.76</b> | 647.88           | 1293.78        | 647.39           | 11 |
| 3  | <b>357.18</b>  | 179.09          | 340.15         | 170.58           | <b>339.17</b>  | 170.09           | L    | <b>1197.75</b> | 599.38          | 1180.72        | 590.86           | 1179.73        | 590.37           | 10 |
| 4  | <b>486.22</b>  | <b>243.61</b>   | 469.19         | 235.10           | <b>468.21</b>  | 234.61           | E    | <b>1084.66</b> | 542.83          | <b>1067.63</b> | 534.32           | <b>1066.65</b> | 533.83           | 9  |
| 5  | <b>557.26</b>  | 279.13          | 540.23         | 270.62           | <b>539.25</b>  | 270.13           | A    | <b>955.62</b>  | 478.31          | 938.59         | 469.80           |                |                  | 8  |
| 6  | <b>670.34</b>  | 335.67          | 653.31         | 327.16           | 652.33         | 326.67           | L    | <b>884.58</b>  | 442.79          | 867.55         | 434.28           |                |                  | 7  |
| 7  | <b>783.42</b>  | 392.22          | <b>766.40</b>  | 383.70           | <b>765.41</b>  | 383.21           | L    | <b>771.50</b>  | 386.25          | 754.47         | 377.74           |                |                  | 6  |
| 8  | <b>882.49</b>  | 441.75          | <b>865.47</b>  | 433.24           | <b>864.48</b>  | 432.74           | V    | <b>658.41</b>  | 329.71          | 641.39         | 321.20           |                |                  | 5  |
| 9  | <b>953.53</b>  | 477.27          | <b>936.50</b>  | 468.76           | <b>935.52</b>  | 468.26           | A    | <b>559.34</b>  | 280.18          | 542.32         | 271.66           |                |                  | 4  |
| 10 | <b>1066.61</b> | 533.81          | <b>1049.59</b> | 525.30           | <b>1048.60</b> | 524.81           | L    | <b>488.31</b>  | <b>244.66</b>   | 471.28         | 236.14           |                |                  | 3  |
| 11 | <b>1294.73</b> | 647.87          | <b>1277.70</b> | 639.35           | <b>1276.71</b> | 638.86           | K    | <b>375.22</b>  | 188.12          | 358.20         | 179.60           |                |                  | 2  |
| 12 |                |                 |                |                  |                |                  | K    | 147.11         | 74.06           | 130.09         | 65.55            |                |                  | 1  |

# chaperone Hsp70, co-chaperone with DnaJ K70

## QAVTNPQNTLFAI<sup>Succ</sup>KR

MS/MS Fragmentation of **QAVTNPQNTLFAIKR**

Found in [gi|170079677](#), chaperone Hsp70, co-chaperone with DnaJ [Escherichia coli s

Match to Query 13527: 1799.951574 from(900.983063,2+)

From data file xie021.dta

Click mouse within plot area to zoom in by factor of two about that point

Or,   to  Da

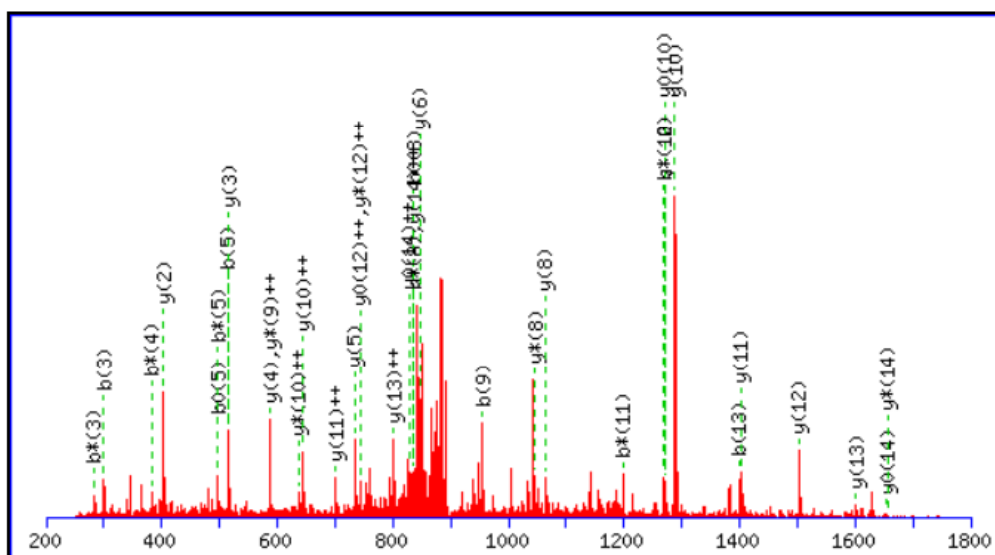

Monoisotopic mass of neutral peptide Mr(calc): 1799.95

Variable modifications:

K14 : Succinyl (K)

Ions Score: 43 Expect: 0.0058

| #  | b       | b <sup>++</sup> | b*      | b <sup>*++</sup> | b <sup>0</sup> | b <sup>0++</sup> | Seq. | y       | y <sup>++</sup> | y*      | y <sup>*++</sup> | y <sup>0</sup> | y <sup>0++</sup> | #  |
|----|---------|-----------------|---------|------------------|----------------|------------------|------|---------|-----------------|---------|------------------|----------------|------------------|----|
| 1  | 129.07  | 65.04           | 112.04  | 56.52            |                |                  | Q    |         |                 |         |                  |                |                  | 15 |
| 2  | 200.10  | 100.56          | 183.08  | 92.04            |                |                  | A    | 1672.90 | 836.95          | 1655.88 | 828.44           | 1654.89        | 827.95           | 14 |
| 3  | 299.17  | 150.09          | 282.14  | 141.58           |                |                  | V    | 1601.86 | 801.44          | 1584.84 | 792.92           | 1583.85        | 792.43           | 13 |
| 4  | 400.22  | 200.61          | 383.19  | 192.10           | 382.21         | 191.61           | T    | 1502.80 | 751.90          | 1485.77 | 743.39           | 1484.79        | 742.90           | 12 |
| 5  | 514.26  | 257.63          | 497.24  | 249.12           | 496.25         | 248.63           | N    | 1401.75 | 701.38          | 1384.72 | 692.86           | 1383.74        | 692.37           | 11 |
| 6  | 611.31  | 306.16          | 594.29  | 297.65           | 593.30         | 297.16           | P    | 1287.71 | 644.36          | 1270.68 | 635.84           | 1269.69        | 635.35           | 10 |
| 7  | 739.37  | 370.19          | 722.35  | 361.68           | 721.36         | 361.19           | Q    | 1190.65 | 595.83          | 1173.63 | 587.32           | 1172.64        | 586.82           | 9  |
| 8  | 853.42  | 427.21          | 836.39  | 418.70           | 835.41         | 418.21           | N    | 1062.59 | 531.80          | 1045.57 | 523.29           | 1044.58        | 522.80           | 8  |
| 9  | 954.46  | 477.74          | 937.44  | 469.22           | 936.45         | 468.73           | T    | 948.55  | 474.78          | 931.52  | 466.27           | 930.54         | 465.77           | 7  |
| 10 | 1067.55 | 534.28          | 1050.52 | 525.76           | 1049.54        | 525.27           | L    | 847.50  | 424.26          | 830.48  | 415.74           |                |                  | 6  |
| 11 | 1214.62 | 607.81          | 1197.59 | 599.30           | 1196.61        | 598.81           | F    | 734.42  | 367.71          | 717.39  | 359.20           |                |                  | 5  |
| 12 | 1285.65 | 643.33          | 1268.63 | 634.82           | 1267.64        | 634.33           | A    | 587.35  | 294.18          | 570.32  | 285.67           |                |                  | 4  |
| 13 | 1398.74 | 699.87          | 1381.71 | 691.36           | 1380.73        | 690.87           | I    | 516.31  | 258.66          | 499.29  | 250.15           |                |                  | 3  |
| 14 | 1626.85 | 813.93          | 1609.82 | 805.41           | 1608.84        | 804.92           | K    | 403.23  | 202.12          | 386.20  | 193.61           |                |                  | 2  |
| 15 |         |                 |         |                  |                |                  | R    | 175.12  | 88.06           | 158.09  | 79.55            |                |                  | 1  |

**LINYLVEEF<sup>Succ</sup>KK**

MS/MS Fragmentation of **LINYLVEEFKK**

Found in **gi170079677**, chaperone Hsp70, co-chaperone with DnaJ [Escherichia coli st

Match to Query 5954: 1494.802894 from(748.408723,2+)

From data file zzh61.dta

Click mouse within plot area to zoom in by factor of two about that point

Or,   to  Da

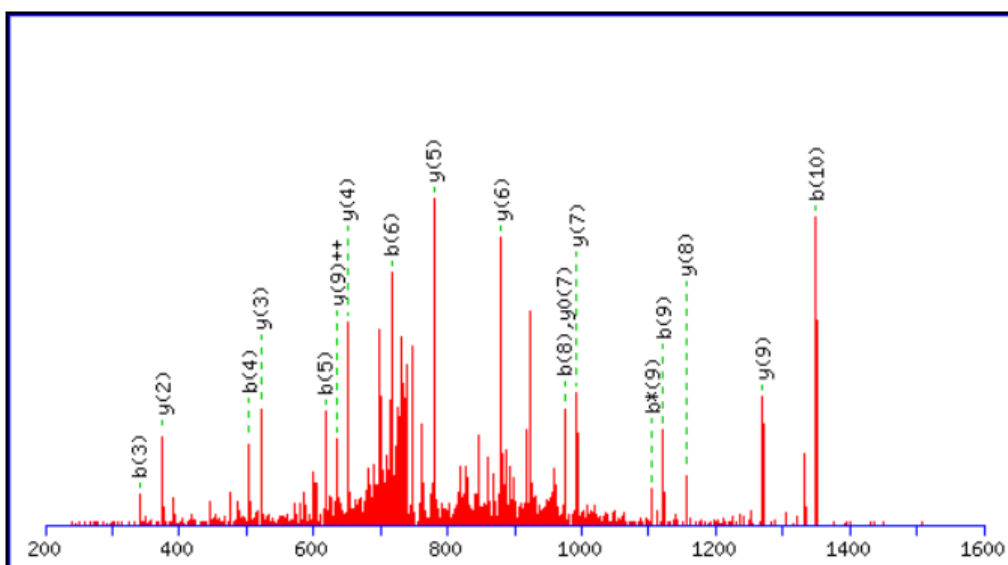

Monoisotopic mass of neutral peptide  $M_r(\text{calc})$ : 1494.80

Variable modifications:

K10 : Succinyl (K)

Ions Score: 56 Expect: 0.00016

| #  | b              | b <sup>++</sup> | b*             | b <sup>*++</sup> | b <sup>0</sup> | b <sup>0++</sup> | Seq. | y              | y <sup>++</sup> | y*      | y <sup>*++</sup> | y <sup>0</sup> | y <sup>0++</sup> | #  |
|----|----------------|-----------------|----------------|------------------|----------------|------------------|------|----------------|-----------------|---------|------------------|----------------|------------------|----|
| 1  | 114.09         | 57.55           |                |                  |                |                  | L    |                |                 |         |                  |                |                  | 11 |
| 2  | 227.18         | 114.09          |                |                  |                |                  | I    | 1382.72        | 691.86          | 1365.69 | 683.35           | 1364.71        | 682.86           | 10 |
| 3  | <b>341.22</b>  | 171.11          | 324.19         | 162.60           |                |                  | N    | <b>1269.64</b> | <b>635.32</b>   | 1252.61 | 626.81           | 1251.63        | 626.32           | 9  |
| 4  | <b>504.28</b>  | 252.64          | 487.26         | 244.13           |                |                  | Y    | <b>1155.59</b> | 578.30          | 1138.57 | 569.79           | 1137.58        | 569.29           | 8  |
| 5  | <b>617.37</b>  | 309.19          | 600.34         | 300.67           |                |                  | L    | <b>992.53</b>  | 496.77          | 975.50  | 488.26           | <b>974.52</b>  | 487.76           | 7  |
| 6  | <b>716.43</b>  | 358.72          | 699.41         | 350.21           |                |                  | V    | <b>879.45</b>  | 440.23          | 862.42  | 431.71           | 861.44         | 431.22           | 6  |
| 7  | 845.48         | 423.24          | 828.45         | 414.73           | 827.47         | 414.24           | E    | <b>780.38</b>  | 390.69          | 763.35  | 382.18           | 762.37         | 381.69           | 5  |
| 8  | <b>974.52</b>  | 487.76          | 957.49         | 479.25           | 956.51         | 478.76           | E    | <b>651.33</b>  | 326.17          | 634.31  | 317.66           | 633.32         | 317.17           | 4  |
| 9  | <b>1121.59</b> | 561.30          | <b>1104.56</b> | 552.78           | 1103.58        | 552.29           | F    | <b>522.29</b>  | 261.65          | 505.27  | 253.14           |                |                  | 3  |
| 10 | <b>1349.70</b> | 675.35          | 1332.67        | 666.84           | 1331.69        | 666.35           | K    | <b>375.22</b>  | 188.12          | 358.20  | 179.60           |                |                  | 2  |
| 11 |                |                 |                |                  |                |                  | K    | 147.11         | 74.06           | 130.09  | 65.55            |                |                  | 1  |

# chaperone Hsp70, co-chaperone with DnaJ K246

## SuccKDQGIDLR

MS/MS Fragmentation of **KDQGIDLR**

Found in [gi|170079677](#), chaperone Hsp70, co-chaperone with DnaJ [Escherichia coli s

Match to Query 3171: 1043.524814 from(522.769683,2+)

From data file xie021.dta

Click mouse within plot area to zoom in by factor of two about that point

Or,   to  Da

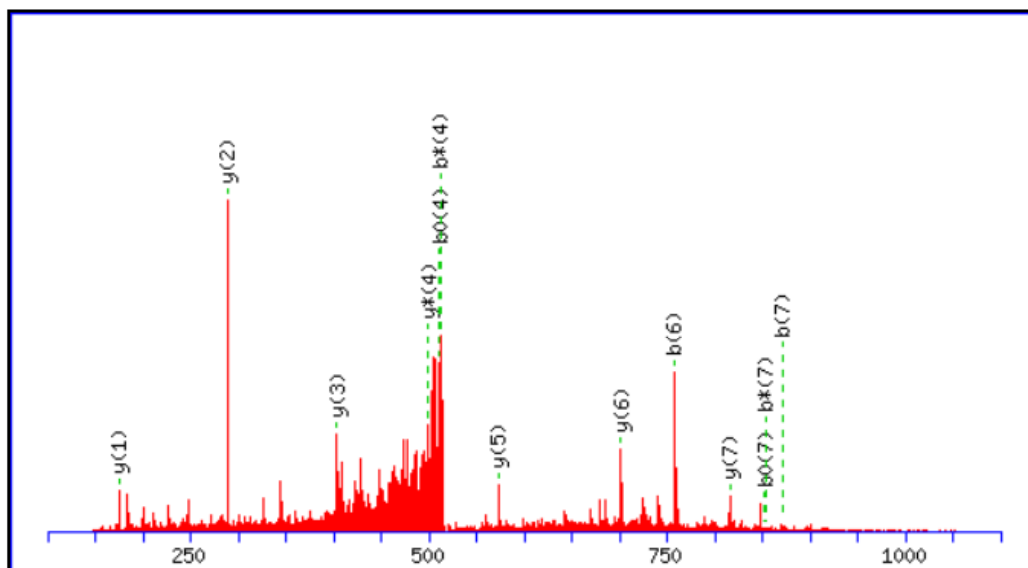

Monoisotopic mass of neutral peptide  $M_r(\text{calc})$ : 1043.52

Variable modifications:

K1 : Succinyl (K)

Ions Score: 31 Expect: 0.065

| # | b      | b <sup>++</sup> | b*     | b <sup>*++</sup> | b <sup>0</sup> | b <sup>0++</sup> | Seq. | y      | y <sup>++</sup> | y*     | y <sup>*++</sup> | y <sup>0</sup> | y <sup>0++</sup> | # |
|---|--------|-----------------|--------|------------------|----------------|------------------|------|--------|-----------------|--------|------------------|----------------|------------------|---|
| 1 | 229.12 | 115.06          | 212.09 | 106.55           |                |                  | K    |        |                 |        |                  |                |                  | 8 |
| 2 | 344.15 | 172.58          | 327.12 | 164.06           | 326.13         | 163.57           | D    | 816.42 | 408.71          | 799.39 | 400.20           | 798.41         | 399.71           | 7 |
| 3 | 472.20 | 236.61          | 455.18 | 228.09           | 454.19         | 227.60           | Q    | 701.39 | 351.20          | 684.37 | 342.69           | 683.38         | 342.20           | 6 |
| 4 | 529.23 | 265.12          | 512.20 | 256.60           | 511.21         | 256.11           | G    | 573.34 | 287.17          | 556.31 | 278.66           | 555.32         | 278.17           | 5 |
| 5 | 642.31 | 321.66          | 625.28 | 313.15           | 624.30         | 312.65           | I    | 516.31 | 258.66          | 499.29 | 250.15           | 498.30         | 249.66           | 4 |
| 6 | 757.34 | 379.17          | 740.31 | 370.66           | 739.33         | 370.17           | D    | 403.23 | 202.12          | 386.20 | 193.61           | 385.22         | 193.11           | 3 |
| 7 | 870.42 | 435.71          | 853.39 | 427.20           | 852.41         | 426.71           | L    | 288.20 | 144.61          | 271.18 | 136.09           |                |                  | 2 |
| 8 |        |                 |        |                  |                |                  | R    | 175.12 | 88.06           | 158.09 | 79.55            |                |                  | 1 |

# chaperone Hsp70, co-chaperone with DnaJ K304

## A<sup>Succ</sup>KLESLVEDLVNR

MS/MS Fragmentation of **AKLESLVEDLVNR**

Found in **gi|170079677**, chaperone Hsp70, co-chaperone with DnaJ [Escherichia coli str

Match to Query 10929: 1584.835364 from(793.424958,2+)

From data file xie021.dta

Click mouse within plot area to zoom in by factor of two about that point

Or,   to  Da

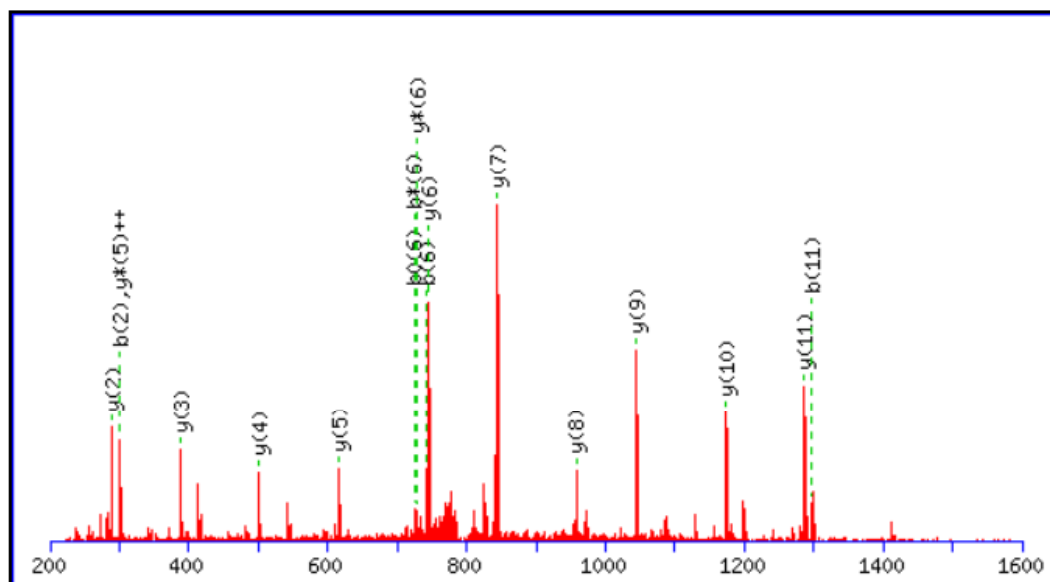

Monoisotopic mass of neutral peptide  $M_r(\text{calc})$ : 1584.84

Variable modifications:

K2 : Succinyl (K)

Ions Score: 86 Expect: 2.8e-007

| #  | b              | b <sup>++</sup> | b*            | b <sup>*++</sup> | b <sup>0</sup> | b <sup>0++</sup> | Seq. | y              | y <sup>++</sup> | y*            | y <sup>*++</sup> | y <sup>0</sup> | y <sup>0++</sup> | #  |
|----|----------------|-----------------|---------------|------------------|----------------|------------------|------|----------------|-----------------|---------------|------------------|----------------|------------------|----|
| 1  | 72.04          | 36.53           |               |                  |                |                  | A    |                |                 |               |                  |                |                  | 13 |
| 2  | <b>300.16</b>  | 150.58          | 283.13        | 142.07           |                |                  | K    | 1514.81        | 757.91          | 1497.78       | 749.39           | 1496.80        | 748.90           | 12 |
| 3  | 413.24         | 207.12          | 396.21        | 198.61           |                |                  | L    | <b>1286.70</b> | 643.85          | 1269.67       | 635.34           | 1268.68        | 634.85           | 11 |
| 4  | 542.28         | 271.64          | 525.26        | 263.13           | 524.27         | 262.64           | E    | <b>1173.61</b> | 587.31          | 1156.58       | 578.80           | 1155.60        | 578.30           | 10 |
| 5  | 629.31         | 315.16          | 612.29        | 306.65           | 611.30         | 306.16           | S    | <b>1044.57</b> | 522.79          | 1027.54       | 514.27           | 1026.56        | 513.78           | 9  |
| 6  | <b>742.40</b>  | 371.70          | <b>725.37</b> | 363.19           | <b>724.39</b>  | 362.70           | L    | <b>957.54</b>  | 479.27          | 940.51        | 470.76           | 939.53         | 470.27           | 8  |
| 7  | 841.47         | 421.24          | 824.44        | 412.72           | 823.46         | 412.23           | V    | <b>844.45</b>  | 422.73          | 827.43        | 414.22           | 826.44         | 413.72           | 7  |
| 8  | 970.51         | 485.76          | 953.48        | 477.24           | 952.50         | 476.75           | E    | <b>745.38</b>  | 373.20          | <b>728.36</b> | 364.68           | 727.37         | 364.19           | 6  |
| 9  | 1085.54        | 543.27          | 1068.51       | 534.76           | 1067.53        | 534.27           | D    | <b>616.34</b>  | 308.67          | 599.31        | <b>300.16</b>    | 598.33         | 299.67           | 5  |
| 10 | 1198.62        | 599.81          | 1181.59       | 591.30           | 1180.61        | 590.81           | L    | <b>501.31</b>  | 251.16          | 484.29        | 242.65           |                |                  | 4  |
| 11 | <b>1297.69</b> | 649.35          | 1280.66       | 640.83           | 1279.68        | 640.34           | V    | <b>388.23</b>  | 194.62          | 371.20        | 186.11           |                |                  | 3  |
| 12 | 1411.73        | 706.37          | 1394.70       | 697.86           | 1393.72        | 697.36           | N    | <b>289.16</b>  | 145.08          | 272.14        | 136.57           |                |                  | 2  |
| 13 |                |                 |               |                  |                |                  | R    | 175.12         | 88.06           | 158.09        | 79.55            |                |                  | 1  |



# chaperone Hsp70, co-chaperone with DnaJ

K359

## VAEFFG<sup>Succ</sup>KEPR

MS/MS Fragmentation of **VAEFFGKEPR**

Found in [gi|170079677](#), chaperone Hsp70, co-chaperone with DnaJ [Escherichia coli st

Match to Query 4737: 1278.631014 from(640.322783,2+)

From data file zzh61.dta

Click mouse within plot area to zoom in by factor of two about that point

Or,   to  Da

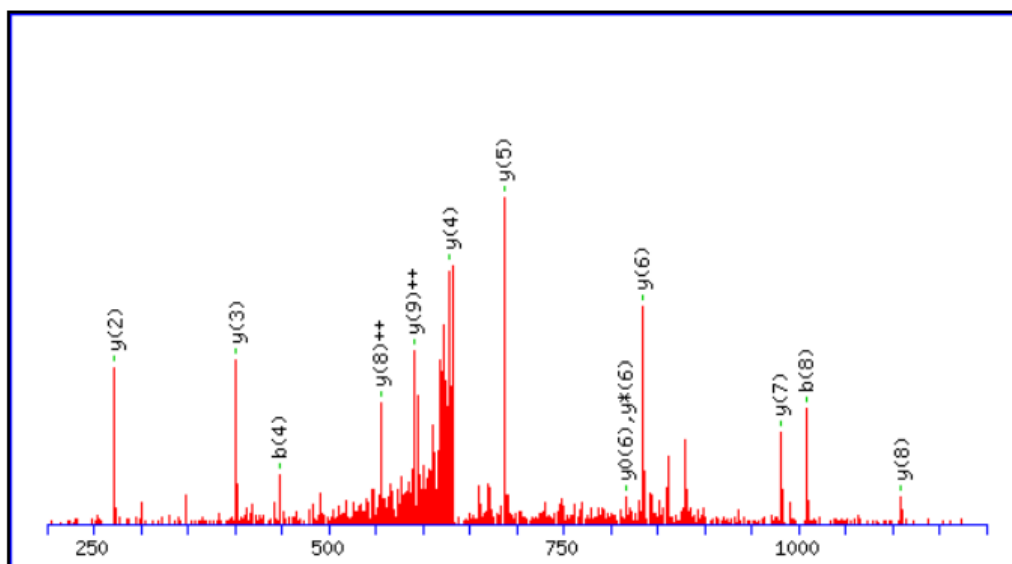

Monoisotopic mass of neutral peptide  $M_r(\text{calc})$ : 1278.62

Variable modifications:

K7 : Succinyl (K)

Ions Score: 48 Expect: 0.00088

| #  | b       | b <sup>++</sup> | b*      | b <sup>*++</sup> | b <sup>0</sup> | b <sup>0++</sup> | Seq. | y       | y <sup>++</sup> | y*      | y <sup>*++</sup> | y <sup>0</sup> | y <sup>0++</sup> | #  |
|----|---------|-----------------|---------|------------------|----------------|------------------|------|---------|-----------------|---------|------------------|----------------|------------------|----|
| 1  | 100.08  | 50.54           |         |                  |                |                  | V    |         |                 |         |                  |                |                  | 10 |
| 2  | 171.11  | 86.06           |         |                  |                |                  | A    | 1180.56 | 590.79          | 1163.54 | 582.27           | 1162.55        | 581.78           | 9  |
| 3  | 300.16  | 150.58          |         |                  | 282.14         | 141.58           | E    | 1109.53 | 555.27          | 1092.50 | 546.75           | 1091.52        | 546.26           | 8  |
| 4  | 447.22  | 224.12          |         |                  | 429.21         | 215.11           | F    | 980.48  | 490.75          | 963.46  | 482.23           | 962.47         | 481.74           | 7  |
| 5  | 594.29  | 297.65          |         |                  | 576.28         | 288.64           | F    | 833.42  | 417.21          | 816.39  | 408.70           | 815.40         | 408.21           | 6  |
| 6  | 651.31  | 326.16          |         |                  | 633.30         | 317.16           | G    | 686.35  | 343.68          | 669.32  | 335.16           | 668.34         | 334.67           | 5  |
| 7  | 879.42  | 440.22          | 862.40  | 431.70           | 861.41         | 431.21           | K    | 629.33  | 315.17          | 612.30  | 306.65           | 611.31         | 306.16           | 4  |
| 8  | 1008.47 | 504.74          | 991.44  | 496.22           | 990.46         | 495.73           | E    | 401.21  | 201.11          | 384.19  | 192.60           | 383.20         | 192.11           | 3  |
| 9  | 1105.52 | 553.26          | 1088.49 | 544.75           | 1087.51        | 544.26           | P    | 272.17  | 136.59          | 255.15  | 128.08           |                |                  | 2  |
| 10 |         |                 |         |                  |                |                  | R    | 175.12  | 88.06           | 158.09  | 79.55            |                |                  | 1  |

# chaperone Hsp70, co-chaperone with DnaJ

K502

## ITISuccKASSGLNEDEIQK

MS/MS Fragmentation of **ITIKASSGLNEDEIQK**

Found in [gi170079677](#), chaperone Hsp70, co-chaperone with DnaJ [Escherichia coli s

Match to Query 7568: 1844.942904 from(923.478728,2+)

From data file zzh61.dta

Click mouse within plot area to zoom in by factor of two about that point

Or,   to  Da

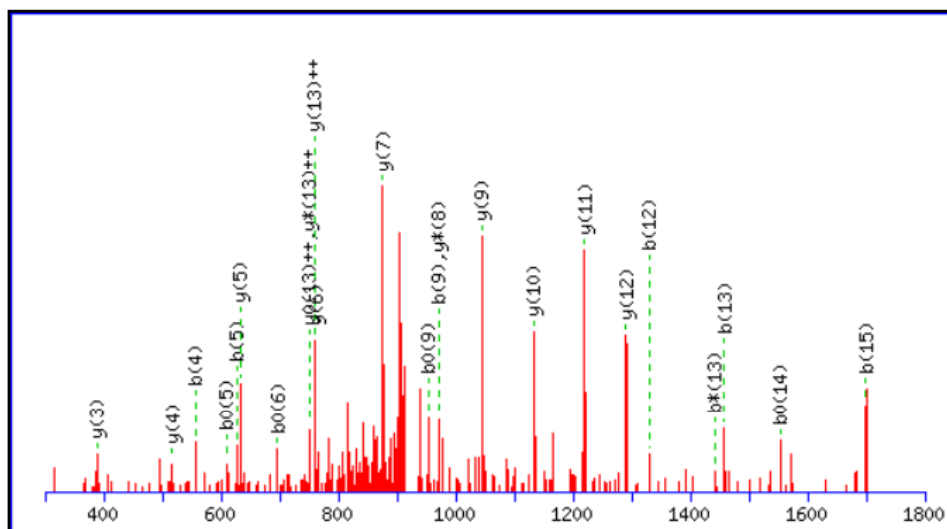

Monoisotopic mass of neutral peptide  $M_r(\text{calc})$ : 1844.94

Variable modifications:

K4 : Succinyl (K)

Ions Score: 17 Expect: 0.0016

| #  | b              | b <sup>++</sup> | b*             | b <sup>*++</sup> | b <sup>0</sup> | b <sup>0++</sup> | Seq. | y              | y <sup>++</sup> | y*            | y <sup>*++</sup> | y <sup>0</sup> | y <sup>0++</sup> | #  |
|----|----------------|-----------------|----------------|------------------|----------------|------------------|------|----------------|-----------------|---------------|------------------|----------------|------------------|----|
| 1  | 114.09         | 57.55           |                |                  |                |                  | I    |                |                 |               |                  |                |                  | 16 |
| 2  | 215.14         | 108.07          |                |                  | 197.13         | 99.07            | T    | 1732.86        | 866.93          | 1715.83       | 858.42           | 1714.85        | 857.93           | 15 |
| 3  | 328.22         | 164.62          |                |                  | 310.21         | 155.61           | I    | 1631.81        | 816.41          | 1614.79       | 807.90           | 1613.80        | 807.40           | 14 |
| 4  | <b>556.33</b>  | 278.67          | 539.31         | 270.16           | 538.32         | 269.67           | K    | 1518.73        | <b>759.87</b>   | 1501.70       | <b>751.35</b>    | 1500.72        | <b>750.86</b>    | 13 |
| 5  | <b>627.37</b>  | 314.19          | 610.34         | 305.68           | <b>609.36</b>  | 305.18           | A    | <b>1290.62</b> | 645.81          | 1273.59       | 637.30           | 1272.61        | 636.81           | 12 |
| 6  | 714.40         | 357.71          | 697.38         | 349.19           | <b>696.39</b>  | 348.70           | S    | <b>1219.58</b> | 610.29          | 1202.55       | 601.78           | 1201.57        | 601.29           | 11 |
| 7  | 801.44         | 401.22          | 784.41         | 392.71           | 783.42         | 392.22           | S    | <b>1132.55</b> | 566.78          | 1115.52       | 558.26           | 1114.54        | 557.77           | 10 |
| 8  | 858.46         | 429.73          | 841.43         | 421.22           | 840.45         | 420.73           | G    | <b>1045.52</b> | 523.26          | 1028.49       | 514.75           | 1027.51        | 514.26           | 9  |
| 9  | <b>971.54</b>  | 486.27          | 954.51         | 477.76           | <b>953.53</b>  | 477.27           | L    | 988.49         | 494.75          | <b>971.47</b> | 486.24           | 970.48         | 485.75           | 8  |
| 10 | 1085.58        | 543.30          | 1068.56        | 534.78           | 1067.57        | 534.29           | N    | <b>875.41</b>  | 438.21          | 858.38        | 429.70           | 857.40         | 429.20           | 7  |
| 11 | 1214.63        | 607.82          | 1197.60        | 599.30           | 1196.62        | 598.81           | E    | <b>761.37</b>  | 381.19          | 744.34        | 372.67           | 743.36         | 372.18           | 6  |
| 12 | <b>1329.65</b> | 665.33          | 1312.63        | 656.82           | 1311.64        | 656.32           | D    | <b>632.32</b>  | 316.67          | 615.30        | 308.15           | 614.31         | 307.66           | 5  |
| 13 | <b>1458.70</b> | 729.85          | <b>1441.67</b> | 721.34           | 1440.69        | 720.85           | E    | <b>517.30</b>  | 259.15          | 500.27        | 250.64           | 499.29         | 250.15           | 4  |
| 14 | 1571.78        | 786.39          | 1554.75        | 777.88           | <b>1553.77</b> | 777.39           | I    | <b>388.26</b>  | 194.63          | 371.23        | 186.12           |                |                  | 3  |
| 15 | <b>1699.84</b> | 850.42          | 1682.81        | 841.91           | 1681.83        | 841.42           | Q    | 275.17         | 138.09          | 258.14        | 129.58           |                |                  | 2  |
| 16 |                |                 |                |                  |                |                  | K    | 147.11         | 74.06           | 130.09        | 65.55            |                |                  | 1  |

# chaperone Hsp70, co-chaperone with DnaJ

K528

SuccKFEELVQTR

MS/MS Fragmentation of **KFEELVQTR**

Found in **gi|170079677**, chaperone Hsp70, co-chaperone with DnaJ [Escherichia coli st

Match to Query 6352: 1248.635414 from(625.324983,2+)

From data file xie021.dta

Click mouse within plot area to zoom in by factor of two about that point

Or,   to  Da

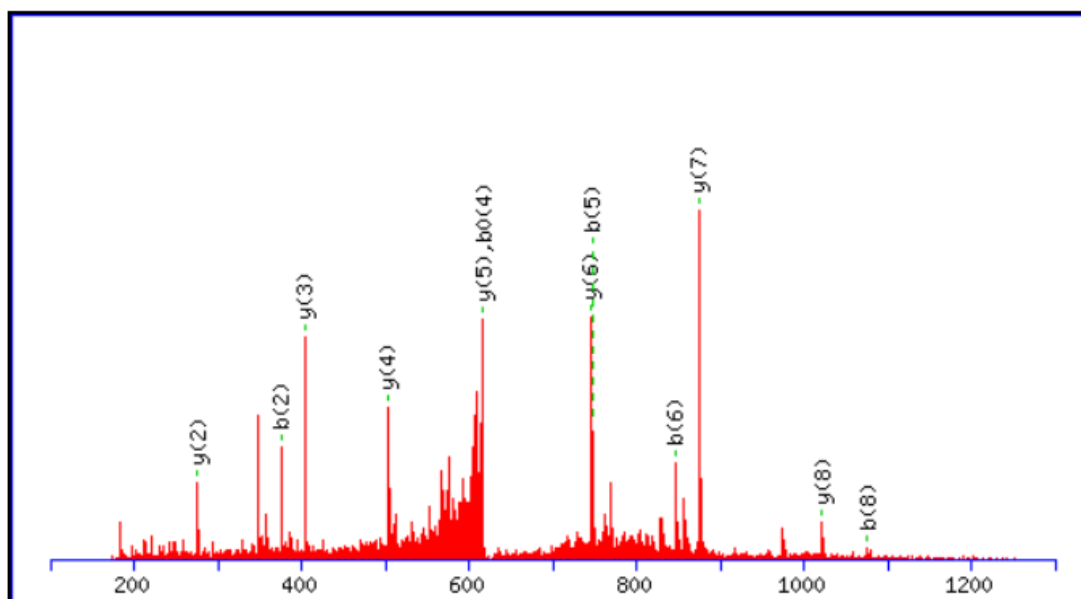

Monoisotopic mass of neutral peptide  $M_r(\text{calc})$ : 1248.63

Variable modifications:

K1 : Succinyl (K)

Ions Score: 40 Expect: 0.0086

| # | b              | b <sup>++</sup> | b*      | b <sup>*++</sup> | b <sup>0</sup> | b <sup>0++</sup> | Seq. | y              | y <sup>++</sup> | y*      | y <sup>*++</sup> | y <sup>0</sup> | y <sup>0++</sup> | # |
|---|----------------|-----------------|---------|------------------|----------------|------------------|------|----------------|-----------------|---------|------------------|----------------|------------------|---|
| 1 | 229.12         | 115.06          | 212.09  | 106.55           |                |                  | K    |                |                 |         |                  |                |                  | 9 |
| 2 | <b>376.19</b>  | 188.60          | 359.16  | 180.08           |                |                  | F    | <b>1021.53</b> | 511.27          | 1004.50 | 502.76           | 1003.52        | 502.26           | 8 |
| 3 | 505.23         | 253.12          | 488.20  | 244.61           | 487.22         | 244.11           | E    | <b>874.46</b>  | 437.74          | 857.44  | 429.22           | 856.45         | 428.73           | 7 |
| 4 | 634.27         | 317.64          | 617.25  | 309.13           | <b>616.26</b>  | 308.63           | E    | <b>745.42</b>  | 373.21          | 728.39  | 364.70           | 727.41         | 364.21           | 6 |
| 5 | <b>747.36</b>  | 374.18          | 730.33  | 365.67           | 729.35         | 365.18           | L    | <b>616.38</b>  | 308.69          | 599.35  | 300.18           | 598.37         | 299.69           | 5 |
| 6 | <b>846.42</b>  | 423.72          | 829.40  | 415.20           | 828.41         | 414.71           | V    | <b>503.29</b>  | 252.15          | 486.27  | 243.64           | 485.28         | 243.15           | 4 |
| 7 | 974.48         | 487.75          | 957.46  | 479.23           | 956.47         | 478.74           | Q    | <b>404.23</b>  | 202.62          | 387.20  | 194.10           | 386.21         | 193.61           | 3 |
| 8 | <b>1075.53</b> | 538.27          | 1058.50 | 529.76           | 1057.52        | 529.26           | T    | <b>276.17</b>  | 138.59          | 259.14  | 130.07           | 258.16         | 129.58           | 2 |
| 9 |                |                 |         |                  |                |                  | R    | 175.12         | 88.06           | 158.09  | 79.55            |                |                  | 1 |

**AAIEA<sup>Succ</sup>KMQELAQVSQK**

MS/MS Fragmentation of **AAIEAKMQELAQVSQK**

Found in [gi|170079677](#), chaperone Hsp70, co-chaperone with DnaJ [Escherichia coli s

Match to Query 13954: 1843.932534 from(922.973543,2+)

From data file xie021.dta

Click mouse within plot area to zoom in by factor of two about that point

Or,   to  Da

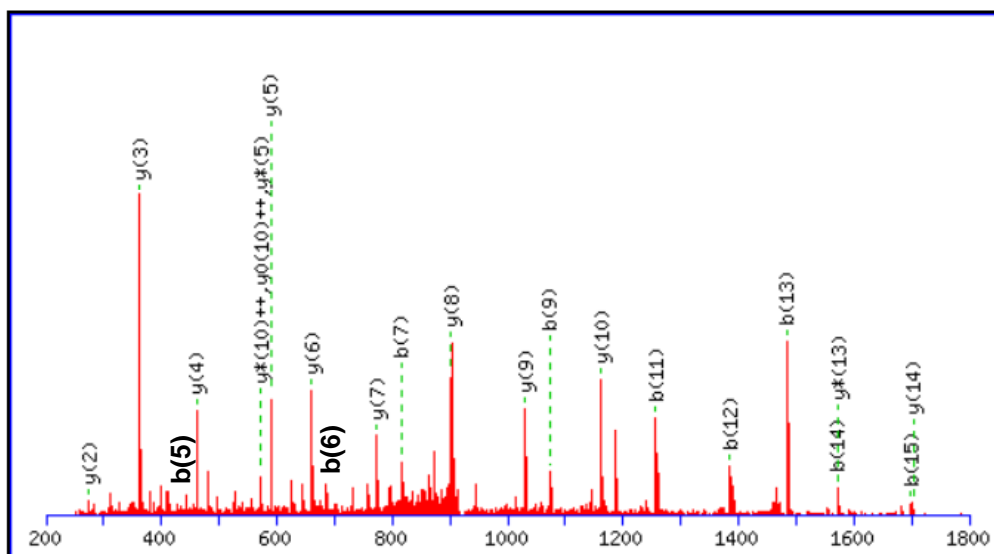

Monoisotopic mass of neutral peptide  $M_r(\text{calc})$ : 1843.93

Variable modifications:

K6 : Succinyl (K)

Ions Score: 53 Expect: 0.00056

| #  | b              | b <sup>++</sup> | b*      | b <sup>*++</sup> | b <sup>0</sup> | b <sup>0++</sup> | Seq. | y              | y <sup>++</sup> | y*             | y <sup>*++</sup> | y <sup>0</sup> | y <sup>0++</sup> | #  |
|----|----------------|-----------------|---------|------------------|----------------|------------------|------|----------------|-----------------|----------------|------------------|----------------|------------------|----|
| 1  | 72.04          | 36.53           |         |                  |                |                  | A    |                |                 |                |                  |                |                  | 16 |
| 2  | 143.08         | 72.04           |         |                  |                |                  | A    | 1773.91        | 887.46          | 1756.88        | 878.94           | 1755.89        | 878.45           | 15 |
| 3  | 256.17         | 128.59          |         |                  |                |                  | I    | <b>1702.87</b> | 851.94          | 1685.84        | 843.42           | 1684.86        | 842.93           | 14 |
| 4  | 385.21         | 193.11          |         |                  | 367.20         | 184.10           | E    | 1589.78        | 795.40          | <b>1572.76</b> | 786.88           | 1571.77        | 786.39           | 13 |
| 5  | <b>456.2</b>   | 28.63           |         |                  | 438.23         | 219.62           | A    | 1460.74        | 730.87          | 1443.71        | 722.36           | 1442.73        | 721.87           | 12 |
| 6  | <b>684.4</b>   | 42.68           | 667.33  | 334.17           | 666.35         | 333.68           | K    | 1389.70        | 695.36          | 1372.68        | 686.84           | 1371.69        | 686.35           | 11 |
| 7  | <b>815.40</b>  | 408.20          | 798.37  | 399.69           | 797.39         | 399.20           | M    | <b>1161.59</b> | 581.30          | 1144.57        | <b>572.79</b>    | 1143.58        | <b>572.29</b>    | 10 |
| 8  | 943.46         | 472.23          | 926.43  | 463.72           | 925.44         | 463.23           | Q    | <b>1030.55</b> | 515.78          | 1013.53        | 507.27           | 1012.54        | 506.77           | 9  |
| 9  | <b>1072.50</b> | 536.75          | 1055.47 | 528.24           | 1054.49        | 527.75           | E    | <b>902.49</b>  | 451.75          | 885.47         | 443.24           | 884.48         | 442.75           | 8  |
| 10 | 1185.58        | 593.29          | 1168.56 | 584.78           | 1167.57        | 584.29           | L    | <b>773.45</b>  | 387.23          | 756.43         | 378.72           | 755.44         | 378.22           | 7  |
| 11 | <b>1256.62</b> | 628.81          | 1239.59 | 620.30           | 1238.61        | 619.81           | A    | <b>660.37</b>  | 330.69          | 643.34         | 322.17           | 642.36         | 321.68           | 6  |
| 12 | <b>1384.68</b> | 692.84          | 1367.65 | 684.33           | 1366.67        | 683.84           | Q    | <b>589.33</b>  | 295.17          | <b>572.30</b>  | 286.66           | 571.32         | 286.16           | 5  |
| 13 | <b>1483.75</b> | 742.38          | 1466.72 | 733.86           | 1465.74        | 733.37           | V    | <b>461.27</b>  | 231.14          | 444.25         | 222.63           | 443.26         | 222.13           | 4  |
| 14 | <b>1570.78</b> | 785.89          | 1553.75 | 777.38           | 1552.77        | 776.89           | S    | <b>362.20</b>  | 181.61          | 345.18         | 173.09           | 344.19         | 172.60           | 3  |
| 15 | <b>1698.84</b> | 849.92          | 1681.81 | 841.41           | 1680.83        | 840.92           | Q    | <b>275.17</b>  | 138.09          | 258.14         | 129.58           |                |                  | 2  |
| 16 |                |                 |         |                  |                |                  | K    | 147.11         | 74.06           | 130.09         | 65.55            |                |                  | 1  |

# Cpn60 chaperonin GroEL, large subunit of GroESL K34

## VTLGP<sup>Succ</sup>KGR

MS/MS Fragmentation of **VTLGPKGR**

Found in [gi|170083592](#), Cpn60 chaperonin GroEL, large subunit of GroESL [Escherich

Match to Query 1886: 926.522494 from(464.268523,2+)

From data file zzh61.dta

Click mouse within plot area to zoom in by factor of two about that point

Or, Plot from  to  Da

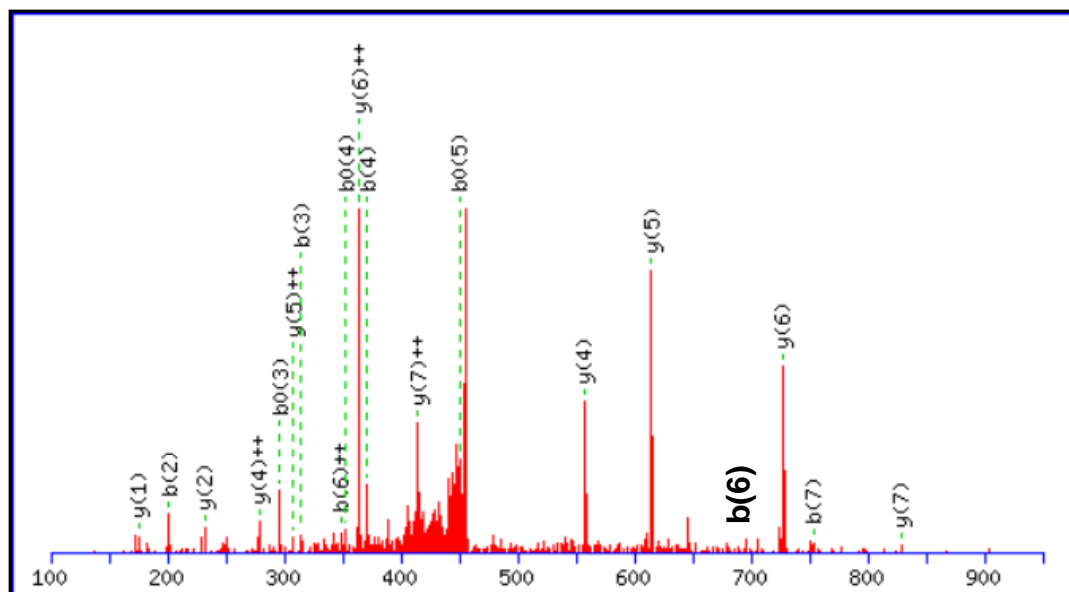

Monoisotopic mass of neutral peptide  $M_r(\text{calc})$ : 926.52

Variable modifications:

K6 : Succinyl (K)

Ions Score: 32 Expect: 0.027

| # | b      | b <sup>++</sup> | b*     | b <sup>*++</sup> | b <sup>0</sup> | b <sup>0++</sup> | Seq. | y      | y <sup>++</sup> | y*     | y <sup>*++</sup> | y <sup>0</sup> | y <sup>0++</sup> | # |
|---|--------|-----------------|--------|------------------|----------------|------------------|------|--------|-----------------|--------|------------------|----------------|------------------|---|
| 1 | 100.08 | 50.54           |        |                  |                |                  | V    |        |                 |        |                  |                |                  | 8 |
| 2 | 201.12 | 101.07          |        |                  | 183.11         | 92.06            | T    | 828.46 | 414.73          | 811.43 | 406.22           | 810.45         | 405.73           | 7 |
| 3 | 314.21 | 157.61          |        |                  | 296.20         | 148.60           | L    | 727.41 | 364.21          | 710.38 | 355.70           |                |                  | 6 |
| 4 | 371.23 | 186.12          |        |                  | 353.22         | 177.11           | G    | 614.33 | 307.67          | 597.30 | 299.15           |                |                  | 5 |
| 5 | 468.28 | 234.64          |        |                  | 450.27         | 225.64           | P    | 557.30 | 279.16          | 540.28 | 270.64           |                |                  | 4 |
| 6 | 696.4  | 48.70           | 679.37 | 340.19           | 678.38         | 339.69           | K    | 460.25 | 230.63          | 443.22 | 222.12           |                |                  | 3 |
| 7 | 753.41 | 377.21          | 736.39 | 368.70           | 735.40         | 368.21           | G    | 232.14 | 116.57          | 215.11 | 108.06           |                |                  | 2 |
| 8 |        |                 |        |                  |                |                  | R    | 175.12 | 88.06           | 158.09 | 79.55            |                |                  | 1 |

# Cpn60 chaperonin GroEL, large subunit of GroESL K51

## SFGAPTIT<sup>Succ</sup>KDGVSVAR

MS/MS Fragmentation of **SFGAPTITKDGVSVAR**

Found in [gi|170083592](#), Cpn60 chaperonin GroEL, large subunit of GroESL [Escherich

Match to Query 6940: 1704.875034 from(853.444793,2+)

From data file zzh61.dta

Click mouse within plot area to zoom in by factor of two about that point

Or,   to  Da

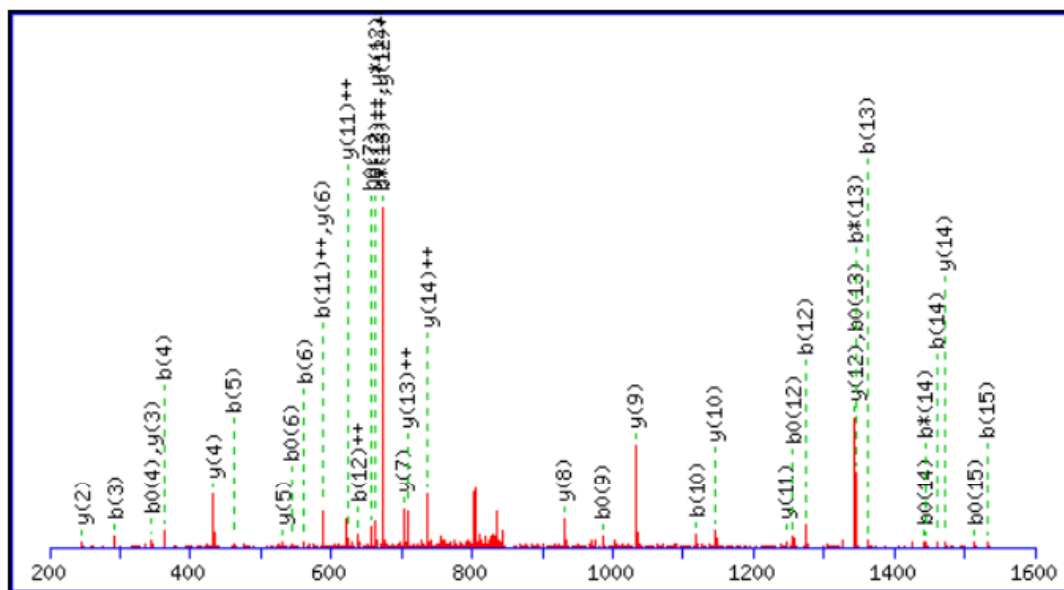

Monoisotopic mass of neutral peptide  $M_r(\text{calc})$ : 1704.87

Variable modifications:

K9 : Succinyl (K)

Ions Score: 63 Expect: 3.4e-005

| #  | b              | b <sup>++</sup> | b*             | b <sup>*++</sup> | b <sup>0</sup> | b <sup>0++</sup> | Seq. | y              | y <sup>++</sup> | y*      | y <sup>*++</sup> | y <sup>0</sup> | y <sup>0++</sup> | #  |
|----|----------------|-----------------|----------------|------------------|----------------|------------------|------|----------------|-----------------|---------|------------------|----------------|------------------|----|
| 1  | 88.04          | 44.52           |                |                  | 70.03          | 35.52            | S    |                |                 |         |                  |                |                  | 16 |
| 2  | 235.11         | 118.06          |                |                  | 217.10         | 109.05           | F    | 1618.84        | 809.93          | 1601.82 | 801.41           | 1600.83        | 800.92           | 15 |
| 3  | <b>292.13</b>  | 146.57          |                |                  | 274.12         | 137.56           | G    | <b>1471.78</b> | <b>736.39</b>   | 1454.75 | 727.88           | 1453.76        | 727.39           | 14 |
| 4  | <b>363.17</b>  | 182.09          |                |                  | <b>345.16</b>  | 173.08           | A    | 1414.75        | <b>707.88</b>   | 1397.73 | 699.37           | 1396.74        | 698.88           | 13 |
| 5  | <b>460.22</b>  | 230.61          |                |                  | 442.21         | 221.61           | P    | <b>1343.72</b> | <b>672.36</b>   | 1326.69 | <b>663.85</b>    | 1325.71        | <b>663.36</b>    | 12 |
| 6  | <b>561.27</b>  | 281.14          |                |                  | <b>543.26</b>  | 272.13           | T    | <b>1246.66</b> | <b>623.84</b>   | 1229.64 | 615.32           | 1228.65        | 614.83           | 11 |
| 7  | 674.35         | 337.68          |                |                  | <b>656.34</b>  | 328.67           | I    | <b>1145.62</b> | 573.31          | 1128.59 | 564.80           | 1127.61        | 564.31           | 10 |
| 8  | 775.40         | 388.20          |                |                  | 757.39         | 379.20           | T    | <b>1032.53</b> | 516.77          | 1015.51 | 508.26           | 1014.52        | 507.76           | 9  |
| 9  | 1003.51        | 502.26          | 986.48         | 493.75           | <b>985.50</b>  | 493.25           | K    | <b>931.48</b>  | 466.25          | 914.46  | 457.73           | 913.47         | 457.24           | 8  |
| 10 | <b>1118.54</b> | 559.77          | 1101.51        | 551.26           | 1100.53        | 550.77           | D    | <b>703.37</b>  | 352.19          | 686.35  | 343.68           | 685.36         | 343.19           | 7  |
| 11 | 1175.56        | <b>588.28</b>   | 1158.53        | 579.77           | 1157.55        | 579.28           | G    | <b>588.35</b>  | 294.68          | 571.32  | 286.16           | 570.34         | 285.67           | 6  |
| 12 | <b>1274.63</b> | <b>637.82</b>   | 1257.60        | 629.30           | <b>1256.62</b> | 628.81           | V    | <b>531.32</b>  | 266.17          | 514.30  | 257.65           | 513.31         | 257.16           | 5  |
| 13 | <b>1361.66</b> | 681.33          | <b>1344.63</b> | <b>672.82</b>    | <b>1343.65</b> | <b>672.33</b>    | S    | <b>432.26</b>  | 216.63          | 415.23  | 208.12           | 414.25         | 207.63           | 4  |
| 14 | <b>1460.73</b> | 730.87          | <b>1443.70</b> | 722.35           | <b>1442.72</b> | 721.86           | V    | <b>345.22</b>  | 173.12          | 328.20  | 164.60           |                |                  | 3  |
| 15 | <b>1531.76</b> | 766.39          | 1514.74        | 757.87           | <b>1513.75</b> | 757.38           | A    | <b>246.16</b>  | 123.58          | 229.13  | 115.07           |                |                  | 2  |
| 16 |                |                 |                |                  |                |                  | R    | 175.12         | 88.06           | 158.09  | 79.55            |                |                  | 1  |

# Cpn60 chaperonin GroEL, large subunit of GroESL

K117

## AVAAGMNPMDL<sup>Succ</sup>KR

MS/MS Fragmentation of **AVAAGMNPMDLKR**

Found in [gi|170083592](#), Cpn60 chaperonin GroEL, large subunit of GroESL [Escherich

Match to Query 5832: 1472.718664 from(737.366608,2+)

From data file zzh61.dta

Click mouse within plot area to zoom in by factor of two about that point

Or,   to  Da

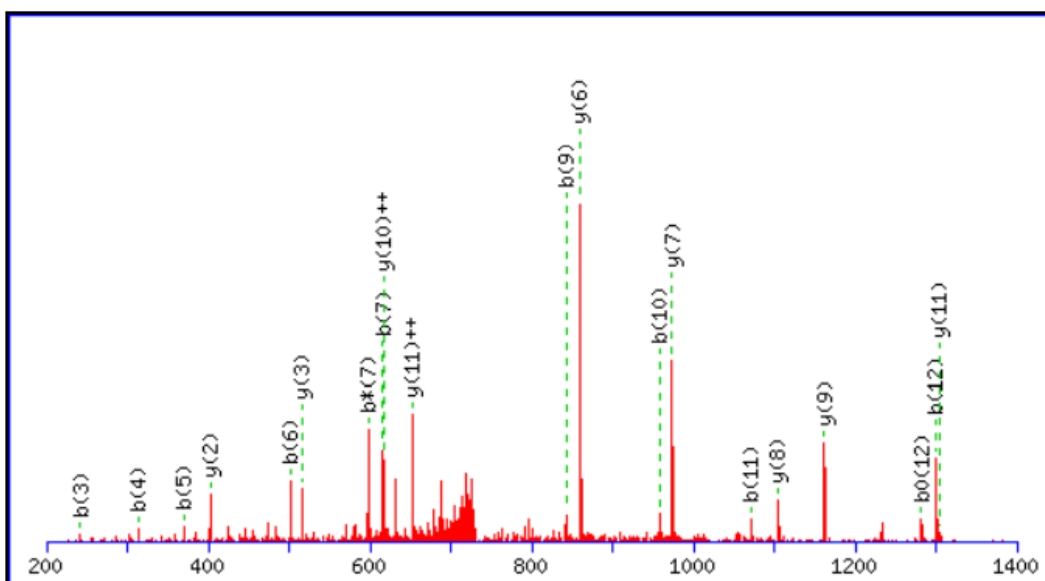

Monoisotopic mass of neutral peptide  $M_r(\text{calc})$ : 1472.71

Variable modifications:

K12 : Succinyl (K)

Ions Score: 45 Expect: 0.0019

| #  | b              | b <sup>++</sup> | b*            | b <sup>*++</sup> | b <sup>0</sup> | b <sup>0++</sup> | Seq. | y              | y <sup>++</sup> | y*      | y <sup>*++</sup> | y <sup>0</sup> | y <sup>0++</sup> | #  |
|----|----------------|-----------------|---------------|------------------|----------------|------------------|------|----------------|-----------------|---------|------------------|----------------|------------------|----|
| 1  | 72.04          | 36.53           |               |                  |                |                  | A    |                |                 |         |                  |                |                  | 13 |
| 2  | 171.11         | 86.06           |               |                  |                |                  | V    | 1402.68        | 701.84          | 1385.66 | 693.33           | 1384.67        | 692.84           | 12 |
| 3  | <b>242.15</b>  | 121.58          |               |                  |                |                  | A    | <b>1303.61</b> | <b>652.31</b>   | 1286.59 | 643.80           | 1285.60        | 643.31           | 11 |
| 4  | <b>313.19</b>  | 157.10          |               |                  |                |                  | A    | 1232.58        | <b>616.79</b>   | 1215.55 | 608.28           | 1214.57        | 607.79           | 10 |
| 5  | <b>370.21</b>  | 185.61          |               |                  |                |                  | G    | <b>1161.54</b> | 581.27          | 1144.51 | 572.76           | 1143.53        | 572.27           | 9  |
| 6  | <b>501.25</b>  | 251.13          |               |                  |                |                  | M    | <b>1104.52</b> | 552.76          | 1087.49 | 544.25           | 1086.51        | 543.76           | 8  |
| 7  | <b>615.29</b>  | 308.15          | <b>598.27</b> | 299.64           |                |                  | N    | <b>973.48</b>  | 487.24          | 956.45  | 478.73           | 955.47         | 478.24           | 7  |
| 8  | 712.34         | 356.68          | 695.32        | 348.16           |                |                  | P    | <b>859.43</b>  | 430.22          | 842.41  | 421.71           | 841.42         | 421.22           | 6  |
| 9  | <b>843.39</b>  | 422.20          | 826.36        | 413.68           |                |                  | M    | 762.38         | 381.69          | 745.35  | 373.18           | 744.37         | 372.69           | 5  |
| 10 | <b>958.41</b>  | 479.71          | 941.39        | 471.20           | 940.40         | 470.70           | D    | 631.34         | 316.17          | 614.31  | 307.66           | 613.33         | 307.17           | 4  |
| 11 | <b>1071.50</b> | 536.25          | 1054.47       | 527.74           | 1053.49        | 527.25           | L    | <b>516.31</b>  | 258.66          | 499.29  | 250.15           |                |                  | 3  |
| 12 | <b>1299.61</b> | 650.31          | 1282.58       | 641.79           | <b>1281.60</b> | 641.30           | K    | <b>403.23</b>  | 202.12          | 386.20  | 193.61           |                |                  | 2  |
| 13 |                |                 |               |                  |                |                  | R    | 175.12         | 88.06           | 158.09  | 79.55            |                |                  | 1  |

# Cpn60 chaperonin GroEL, large subunit of GroESL K277

## VAAV<sup>Succ</sup>KAPGFGDR

MS/MS Fragmentation of **VAAVKAPGFGDR**

Found in **gi|170083592**, Cpn60 chaperonin GroEL, large subunit of GroESL [Escherichi

Match to Query 4790: 1286.667514 from(644.341033,2+)

From data file zzh61.dta

Click mouse within plot area to zoom in by factor of two about that point

Or,   to  Da

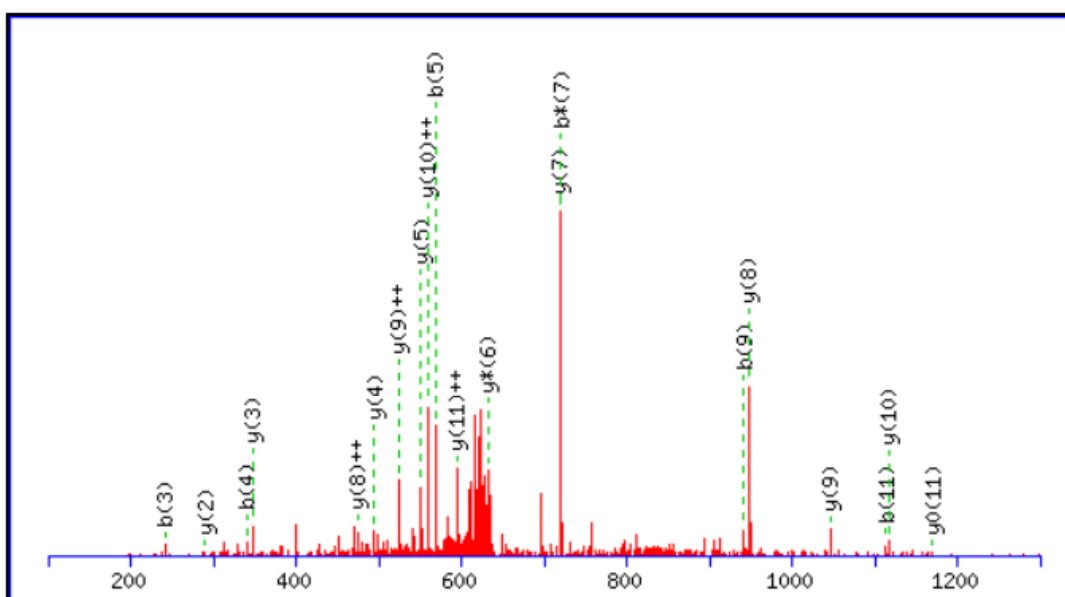

Monoisotopic mass of neutral peptide Mr(calc): 1286.66

Variable modifications:

K5 : Succinyl (K)

Ions Score: 33 Expect: 0.03

| #  | b       | b <sup>++</sup> | b*      | b <sup>*++</sup> | b <sup>0</sup> | b <sup>0++</sup> | Seq. | y       | y <sup>++</sup> | y*      | y <sup>*++</sup> | y <sup>0</sup> | y <sup>0++</sup> | #  |
|----|---------|-----------------|---------|------------------|----------------|------------------|------|---------|-----------------|---------|------------------|----------------|------------------|----|
| 1  | 100.08  | 50.54           |         |                  |                |                  | V    |         |                 |         |                  |                |                  | 12 |
| 2  | 171.11  | 86.06           |         |                  |                |                  | A    | 1188.60 | 594.80          | 1171.57 | 586.29           | 1170.59        | 585.80           | 11 |
| 3  | 242.15  | 121.58          |         |                  |                |                  | A    | 1117.56 | 559.29          | 1100.54 | 550.77           | 1099.55        | 550.28           | 10 |
| 4  | 341.22  | 171.11          |         |                  |                |                  | V    | 1046.53 | 523.77          | 1029.50 | 515.25           | 1028.52        | 514.76           | 9  |
| 5  | 569.33  | 285.17          | 552.30  | 276.66           |                |                  | K    | 947.46  | 474.23          | 930.43  | 465.72           | 929.45         | 465.23           | 8  |
| 6  | 640.37  | 320.69          | 623.34  | 312.17           |                |                  | A    | 719.35  | 360.18          | 702.32  | 351.66           | 701.34         | 351.17           | 7  |
| 7  | 737.42  | 369.21          | 720.39  | 360.70           |                |                  | P    | 648.31  | 324.66          | 631.28  | 316.15           | 630.30         | 315.65           | 6  |
| 8  | 794.44  | 397.72          | 777.41  | 389.21           |                |                  | G    | 551.26  | 276.13          | 534.23  | 267.62           | 533.25         | 267.13           | 5  |
| 9  | 941.51  | 471.26          | 924.48  | 462.74           |                |                  | F    | 494.24  | 247.62          | 477.21  | 239.11           | 476.23         | 238.62           | 4  |
| 10 | 998.53  | 499.77          | 981.50  | 491.26           |                |                  | G    | 347.17  | 174.09          | 330.14  | 165.57           | 329.16         | 165.08           | 3  |
| 11 | 1113.56 | 557.28          | 1096.53 | 548.77           | 1095.55        | 548.28           | D    | 290.15  | 145.58          | 273.12  | 137.06           | 272.14         | 136.57           | 2  |
| 12 |         |                 |         |                  |                |                  | R    | 175.12  | 88.06           | 158.09  | 79.55            |                |                  | 1  |



# Cpn60 chaperonin GroEL, large subunit of GroESL K321

## ATLEDLGQA<sup>Succ</sup>KR

MS/MS Fragmentation of **ATLEDLGQAKR**

Found in [gi|170083592](#), Cpn60 chaperonin GroEL, large subunit of GroESL [Escherich

Match to Query 4892: 1300.667634 from(651.341093,2+)

From data file zzh61.dta

Click mouse within plot area to zoom in by factor of two about that point

Or,   to  Da

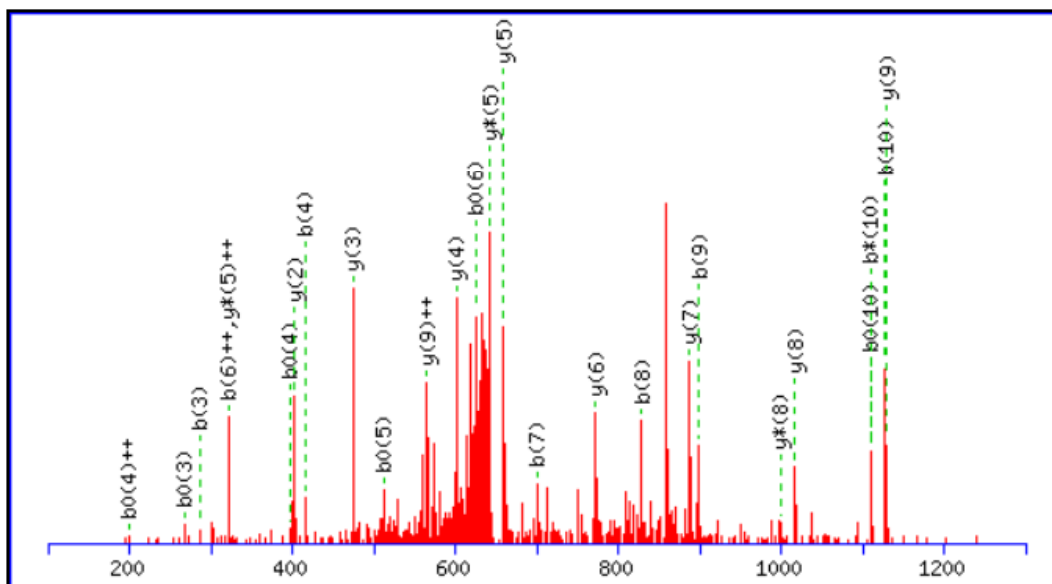

Monoisotopic mass of neutral peptide  $M_r(\text{calc})$ : 1300.66

Variable modifications:

K10 : Succinyl (K)

Ions Score: 40 Expect: 0.0063

| #  | b              | b <sup>++</sup> | b*             | b <sup>*++</sup> | b <sup>0</sup> | b <sup>0++</sup> | Seq. | y              | y <sup>++</sup> | y*            | y <sup>*++</sup> | y <sup>0</sup> | y <sup>0++</sup> | #  |
|----|----------------|-----------------|----------------|------------------|----------------|------------------|------|----------------|-----------------|---------------|------------------|----------------|------------------|----|
| 1  | 72.04          | 36.53           |                |                  |                |                  | A    |                |                 |               |                  |                |                  | 11 |
| 2  | 173.09         | 87.05           |                |                  | 155.08         | 78.04            | T    | 1230.63        | 615.82          | 1213.61       | 607.31           | 1212.62        | 606.81           | 10 |
| 3  | <b>286.18</b>  | 143.59          |                |                  | <b>268.17</b>  | 134.59           | L    | <b>1129.58</b> | <b>565.30</b>   | 1112.56       | 556.78           | 1111.57        | 556.29           | 9  |
| 4  | <b>415.22</b>  | 208.11          |                |                  | <b>397.21</b>  | <b>199.11</b>    | E    | <b>1016.50</b> | 508.75          | <b>999.47</b> | 500.24           | 998.49         | 499.75           | 8  |
| 5  | 530.25         | 265.63          |                |                  | <b>512.24</b>  | 256.62           | D    | <b>887.46</b>  | 444.23          | 870.43        | 435.72           | 869.45         | 435.23           | 7  |
| 6  | 643.33         | <b>322.17</b>   |                |                  | <b>625.32</b>  | 313.16           | L    | <b>772.43</b>  | 386.72          | 755.40        | 378.21           |                |                  | 6  |
| 7  | <b>700.35</b>  | 350.68          |                |                  | 682.34         | 341.67           | G    | <b>659.35</b>  | 330.18          | <b>642.32</b> | <b>321.66</b>    |                |                  | 5  |
| 8  | <b>828.41</b>  | 414.71          | 811.38         | 406.20           | 810.40         | 405.70           | Q    | <b>602.33</b>  | 301.67          | 585.30        | 293.15           |                |                  | 4  |
| 9  | <b>899.45</b>  | 450.23          | 882.42         | 441.71           | 881.44         | 441.22           | A    | <b>474.27</b>  | 237.64          | 457.24        | 229.12           |                |                  | 3  |
| 10 | <b>1127.56</b> | 564.28          | <b>1110.53</b> | 555.77           | <b>1109.55</b> | 555.28           | K    | <b>403.23</b>  | 202.12          | 386.20        | 193.61           |                |                  | 2  |
| 11 |                |                 |                |                  |                |                  | R    | 175.12         | 88.06           | 158.09        | 79.55            |                |                  | 1  |

# Cpn60 chaperonin GroEL, large subunit of GroESL K390

## VGAATEVEM<sup>Succ</sup>KEK

MS/MS Fragmentation of **VGAATEVEMKEK**

Found in [gi170083592](#), Cpn60 chaperonin GroEL, large subunit of GroESL [Escherich]

Match to Query 8286: 1390.663004 from(696.338778,2+)

From data file xie021.dta

Click mouse within plot area to zoom in by factor of two about that point

Or,   to  Da

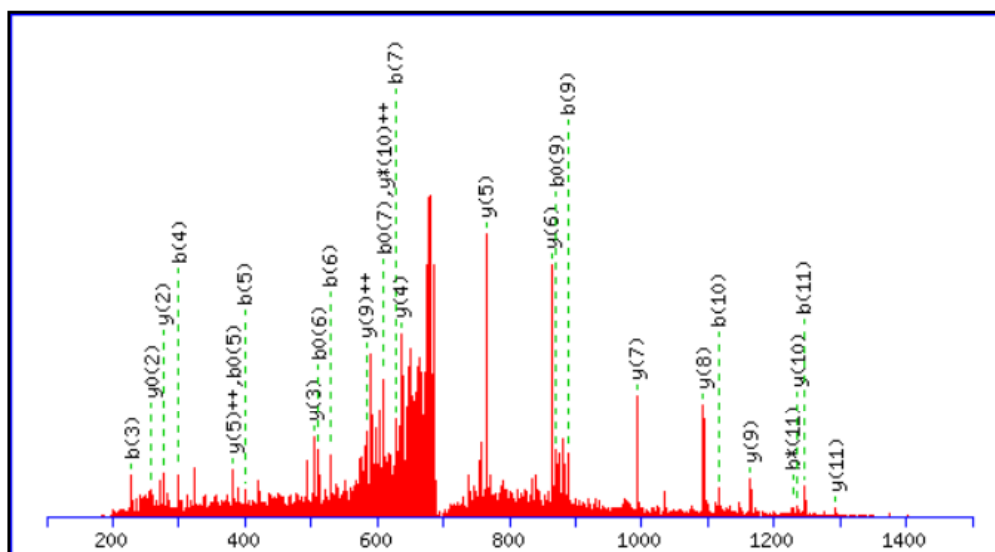

Monoisotopic mass of neutral peptide Mr(calc): 1390.66

Variable modifications:

K10 : Succinyl (K)

Ions Score: 50 Expect: 0.00094

| #  | b       | b <sup>++</sup> | b*      | b <sup>*++</sup> | b <sup>0</sup> | b <sup>0++</sup> | Seq. | y       | y <sup>++</sup> | y*      | y <sup>*++</sup> | y <sup>0</sup> | y <sup>0++</sup> | #  |
|----|---------|-----------------|---------|------------------|----------------|------------------|------|---------|-----------------|---------|------------------|----------------|------------------|----|
| 1  | 100.08  | 50.54           |         |                  |                |                  | V    |         |                 |         |                  |                |                  | 12 |
| 2  | 157.10  | 79.05           |         |                  |                |                  | G    | 1292.60 | 646.81          | 1275.58 | 638.29           | 1274.59        | 637.80           | 11 |
| 3  | 228.13  | 114.57          |         |                  |                |                  | A    | 1235.58 | 618.29          | 1218.56 | 609.78           | 1217.57        | 609.29           | 10 |
| 4  | 299.17  | 150.09          |         |                  |                |                  | A    | 1164.55 | 582.78          | 1147.52 | 574.26           | 1146.53        | 573.77           | 9  |
| 5  | 400.22  | 200.61          |         |                  | 382.21         | 191.61           | T    | 1093.51 | 547.26          | 1076.48 | 538.74           | 1075.50        | 538.25           | 8  |
| 6  | 529.26  | 265.13          |         |                  | 511.25         | 256.13           | E    | 992.46  | 496.73          | 975.43  | 488.22           | 974.45         | 487.73           | 7  |
| 7  | 628.33  | 314.67          |         |                  | 610.32         | 305.66           | V    | 863.42  | 432.21          | 846.39  | 423.70           | 845.41         | 423.21           | 6  |
| 8  | 757.37  | 379.19          |         |                  | 739.36         | 370.18           | E    | 764.35  | 382.68          | 747.32  | 374.17           | 746.34         | 373.67           | 5  |
| 9  | 888.41  | 444.71          |         |                  | 870.40         | 435.70           | M    | 635.31  | 318.16          | 618.28  | 309.64           | 617.30         | 309.15           | 4  |
| 10 | 1116.52 | 558.77          | 1099.50 | 550.25           | 1098.51        | 549.76           | K    | 504.27  | 252.64          | 487.24  | 244.12           | 486.26         | 243.63           | 3  |
| 11 | 1245.57 | 623.29          | 1228.54 | 614.77           | 1227.56        | 614.28           | E    | 276.16  | 138.58          | 259.13  | 130.07           | 258.14         | 129.58           | 2  |
| 12 |         |                 |         |                  |                |                  | K    | 147.11  | 74.06           | 130.09  | 65.55            |                |                  | 1  |

# 50S ribosomal subunit protein L11

K72

## SFTFVT<sup>Succ</sup>KTPPAVLLK

MS/MS Fragmentation of **SFTFVTKTPPAVLLK**

Found in **gi170083443**, 50S ribosomal subunit protein L11 [Escherichia coli str. K-12

Match to Query 13697: 1819.012124 from(910.513338,2+)

From data file xie021.dta

Click mouse within plot area to zoom in by factor of two about that point

Or, Plot from  to  Da

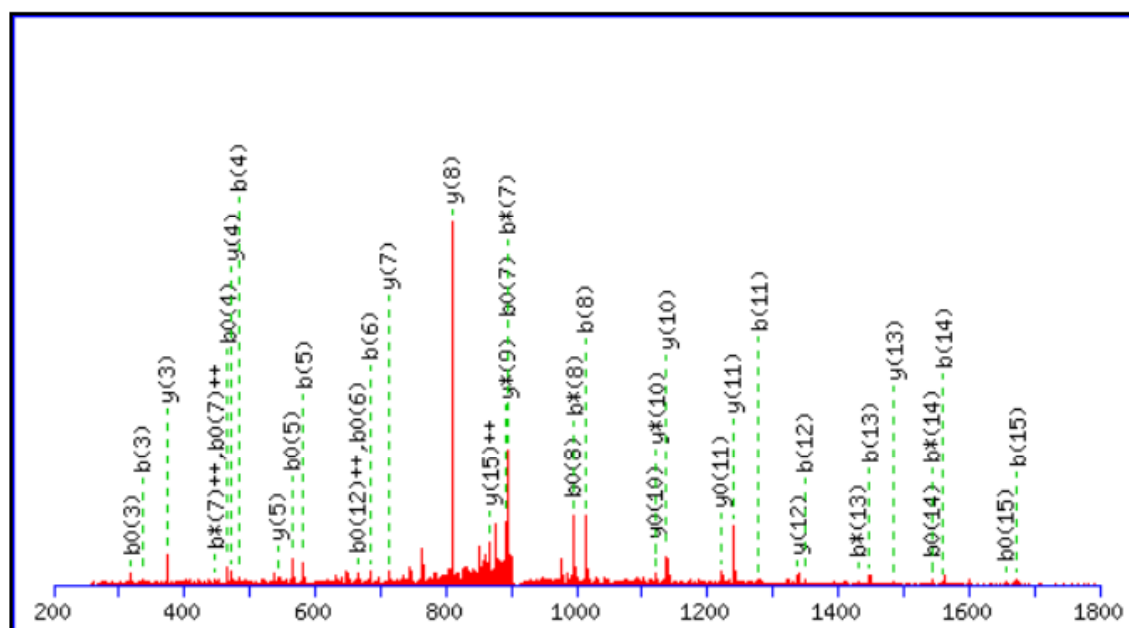

Monoisotopic mass of neutral peptide Mr(calc): 1819.01

Variable modifications:

K7 : Succinyl (K)

Ions Score: 42 Expect: 0.007

| #  | b              | b <sup>++</sup> | b*             | b <sup>*++</sup> | b <sup>0</sup> | b <sup>0++</sup> | Seq. | y              | y <sup>++</sup> | y*             | y <sup>*++</sup> | y <sup>0</sup> | y <sup>0++</sup> | #  |
|----|----------------|-----------------|----------------|------------------|----------------|------------------|------|----------------|-----------------|----------------|------------------|----------------|------------------|----|
| 1  | 88.04          | 44.52           |                |                  | 70.03          | 35.52            | S    |                |                 |                |                  |                |                  | 16 |
| 2  | 235.11         | 118.06          |                |                  | 217.10         | 109.05           | F    | 1732.99        | <b>867.00</b>   | 1715.96        | 858.48           | 1714.98        | 857.99           | 15 |
| 3  | <b>336.16</b>  | 168.58          |                |                  | <b>318.14</b>  | 159.58           | T    | 1585.92        | 793.46          | 1568.89        | 784.95           | 1567.91        | 784.46           | 14 |
| 4  | <b>483.22</b>  | 242.12          |                |                  | <b>465.21</b>  | 233.11           | F    | <b>1484.87</b> | 742.94          | 1467.85        | 734.43           | 1466.86        | 733.93           | 13 |
| 5  | <b>582.29</b>  | 291.65          |                |                  | <b>564.28</b>  | 282.64           | V    | <b>1337.80</b> | 669.41          | 1320.78        | 660.89           | 1319.79        | 660.40           | 12 |
| 6  | <b>683.34</b>  | 342.17          |                |                  | <b>665.33</b>  | 333.17           | T    | <b>1238.74</b> | 619.87          | 1221.71        | 611.36           | <b>1220.72</b> | 610.87           | 11 |
| 7  | 911.45         | 456.23          | <b>894.42</b>  | <b>447.72</b>    | <b>893.44</b>  | <b>447.22</b>    | K    | <b>1137.69</b> | 569.35          | <b>1120.66</b> | 560.83           | <b>1119.68</b> | 560.34           | 10 |
| 8  | <b>1012.50</b> | 506.75          | <b>995.47</b>  | 498.24           | <b>994.49</b>  | 497.75           | T    | 909.58         | 455.29          | <b>892.55</b>  | 446.78           | 891.57         | 446.29           | 9  |
| 9  | 1109.55        | 555.28          | 1092.52        | 546.77           | 1091.54        | 546.27           | P    | <b>808.53</b>  | 404.77          | 791.50         | 396.25           |                |                  | 8  |
| 10 | 1206.60        | 603.81          | 1189.58        | 595.29           | 1188.59        | 594.80           | P    | <b>711.48</b>  | 356.24          | 694.45         | 347.73           |                |                  | 7  |
| 11 | <b>1277.64</b> | 639.32          | 1260.61        | 630.81           | 1259.63        | 630.32           | A    | 614.42         | 307.72          | 597.40         | 299.20           |                |                  | 6  |
| 12 | <b>1348.68</b> | 674.84          | 1331.65        | 666.33           | 1330.67        | <b>665.84</b>    | A    | <b>543.39</b>  | 272.20          | 526.36         | 263.68           |                |                  | 5  |
| 13 | <b>1447.75</b> | 724.38          | <b>1430.72</b> | 715.86           | 1429.74        | 715.37           | V    | <b>472.35</b>  | 236.68          | 455.32         | 228.17           |                |                  | 4  |
| 14 | <b>1560.83</b> | 780.92          | <b>1543.80</b> | 772.41           | <b>1542.82</b> | 771.91           | L    | <b>373.28</b>  | 187.14          | 356.25         | 178.63           |                |                  | 3  |
| 15 | <b>1673.91</b> | 837.46          | 1656.89        | 828.95           | <b>1655.90</b> | 828.46           | L    | 260.20         | 130.60          | 243.17         | 122.09           |                |                  | 2  |
| 16 |                |                 |                |                  |                |                  | K    | 147.11         | 74.06           | 130.09         | 65.55            |                |                  | 1  |

TPPAAVLL<sup>Succ</sup>KKMS/MS Fragmentation of **TPPAVLLKK**Found in [gi|170083443](#), 50S ribosomal subunit protein L11 [Escherichia coli str. K-12

Match to Query 4432: 1136.681674 from(569.348113,2+)

From data file xie021.dta

Click mouse within plot area to zoom in by factor of two about that point

Or,   to  Da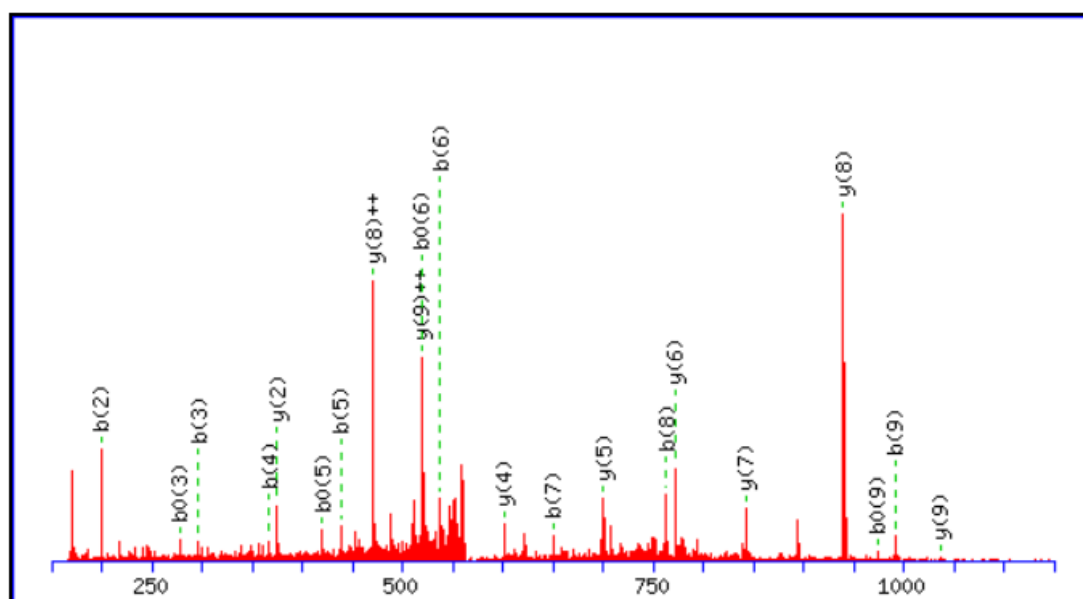Monoisotopic mass of neutral peptide  $M_r(\text{calc})$ : 1136.68

Variable modifications:

K9 : Succinyl (K)

Ions Score: 43 Expect: 0.0037

| #  | b      | b <sup>++</sup> | b*     | b <sup>*++</sup> | b <sup>0</sup> | b <sup>0++</sup> | Seq. | y       | y <sup>++</sup> | y*      | y <sup>*++</sup> | #  |
|----|--------|-----------------|--------|------------------|----------------|------------------|------|---------|-----------------|---------|------------------|----|
| 1  | 102.05 | 51.53           |        |                  | 84.04          | 42.53            | T    |         |                 |         |                  | 10 |
| 2  | 199.11 | 100.06          |        |                  | 181.10         | 91.05            | P    | 1036.64 | 518.82          | 1019.61 | 510.31           | 9  |
| 3  | 296.16 | 148.58          |        |                  | 278.15         | 139.58           | P    | 939.59  | 470.30          | 922.56  | 461.78           | 8  |
| 4  | 367.20 | 184.10          |        |                  | 349.19         | 175.10           | A    | 842.53  | 421.77          | 825.51  | 413.26           | 7  |
| 5  | 438.23 | 219.62          |        |                  | 420.22         | 210.62           | A    | 771.50  | 386.25          | 754.47  | 377.74           | 6  |
| 6  | 537.30 | 269.16          |        |                  | 519.29         | 260.15           | V    | 700.46  | 350.73          | 683.43  | 342.22           | 5  |
| 7  | 650.39 | 325.70          |        |                  | 632.38         | 316.69           | L    | 601.39  | 301.20          | 584.37  | 292.69           | 4  |
| 8  | 763.47 | 382.24          |        |                  | 745.46         | 373.23           | L    | 488.31  | 244.66          | 471.28  | 236.14           | 3  |
| 9  | 991.58 | 496.29          | 974.56 | 487.78           | 973.57         | 487.29           | K    | 375.22  | 188.12          | 358.20  | 179.60           | 2  |
| 10 |        |                 |        |                  |                |                  | K    | 147.11  | 74.06           | 130.09  | 65.55            | 1  |

# 50S ribosomal subunit protein L3

K38

## VTQV<sup>Succ</sup>KDLANDGYR

MS/MS Fragmentation of **VTQVKDLANDGYR**

Found in [gi|170082839](#), 50S ribosomal subunit protein L3 [Escherichia coli str. K-12 s

Match to Query 6384: 1577.775304 from(789.894928,2+)

From data file zzh61.dta

Click mouse within plot area to zoom in by factor of two about that point

Or,   to  Da

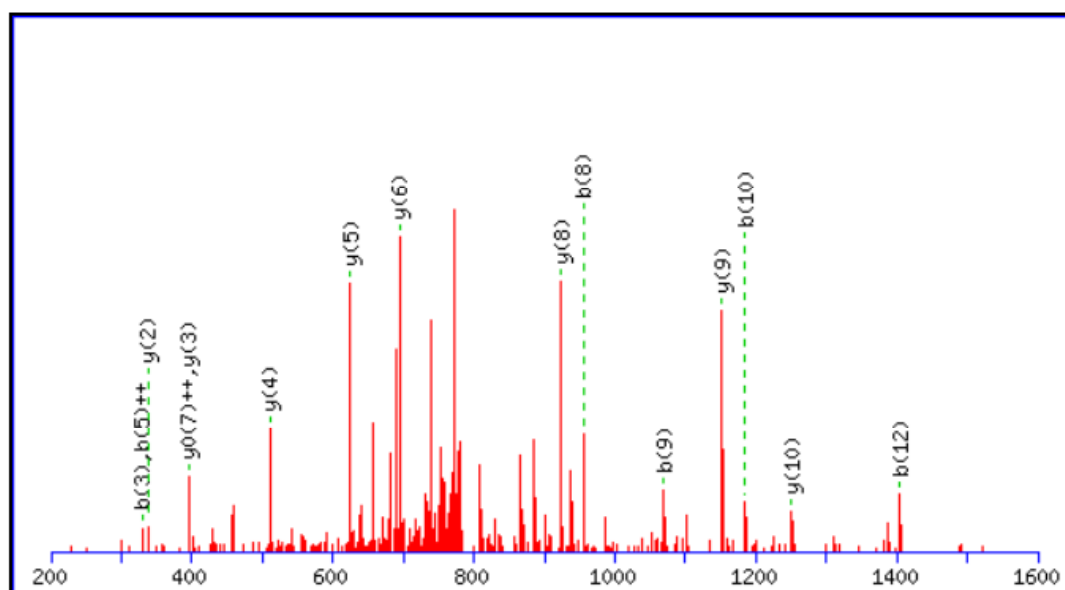

Monoisotopic mass of neutral peptide  $M_r(\text{calc})$ : 1577.77

Variable modifications:

K5 : Succinyl (K)

Ions Score: 62 Expect: 4.2e-005

| #  | b              | b <sup>++</sup> | b <sup>*</sup> | b <sup>*++</sup> | b <sup>0</sup> | b <sup>0++</sup> | Seq. | y              | y <sup>++</sup> | y <sup>*</sup> | y <sup>*++</sup> | y <sup>0</sup> | y <sup>0++</sup> | #  |
|----|----------------|-----------------|----------------|------------------|----------------|------------------|------|----------------|-----------------|----------------|------------------|----------------|------------------|----|
| 1  | 100.08         | 50.54           |                |                  |                |                  | V    |                |                 |                |                  |                |                  | 13 |
| 2  | 201.12         | 101.07          |                |                  | 183.11         | 92.06            | T    | 1479.71        | 740.36          | 1462.68        | 731.84           | 1461.70        | 731.35           | 12 |
| 3  | <b>329.18</b>  | 165.09          | 312.16         | 156.58           | 311.17         | 156.09           | Q    | 1378.66        | 689.83          | 1361.63        | 681.32           | 1360.65        | 680.83           | 11 |
| 4  | 428.25         | 214.63          | 411.22         | 206.12           | 410.24         | 205.62           | V    | <b>1250.60</b> | 625.80          | 1233.57        | 617.29           | 1232.59        | 616.80           | 10 |
| 5  | 656.36         | <b>328.68</b>   | 639.33         | 320.17           | 638.35         | 319.68           | K    | <b>1151.53</b> | 576.27          | 1134.51        | 567.76           | 1133.52        | 567.26           | 9  |
| 6  | 771.39         | 386.20          | 754.36         | 377.68           | 753.38         | 377.19           | D    | <b>923.42</b>  | 462.21          | 906.40         | 453.70           | 905.41         | 453.21           | 8  |
| 7  | 884.47         | 442.74          | 867.45         | 434.23           | 866.46         | 433.73           | L    | 808.39         | 404.70          | 791.37         | 396.19           | 790.38         | <b>395.70</b>    | 7  |
| 8  | <b>955.51</b>  | 478.26          | 938.48         | 469.75           | 937.50         | 469.25           | A    | <b>695.31</b>  | 348.16          | 678.28         | 339.65           | 677.30         | 339.15           | 6  |
| 9  | <b>1069.55</b> | 535.28          | 1052.53        | 526.77           | 1051.54        | 526.27           | N    | <b>624.27</b>  | 312.64          | 607.25         | 304.13           | 606.26         | 303.64           | 5  |
| 10 | <b>1184.58</b> | 592.79          | 1167.55        | 584.28           | 1166.57        | 583.79           | D    | <b>510.23</b>  | 255.62          | 493.20         | 247.11           | 492.22         | 246.61           | 4  |
| 11 | 1241.60        | 621.30          | 1224.57        | 612.79           | 1223.59        | 612.30           | G    | <b>395.20</b>  | 198.11          | 378.18         | 189.59           |                |                  | 3  |
| 12 | <b>1404.66</b> | 702.84          | 1387.64        | 694.32           | 1386.65        | 693.83           | Y    | <b>338.18</b>  | 169.59          | 321.16         | 161.08           |                |                  | 2  |
| 13 |                |                 |                |                  |                |                  | R    | 175.12         | 88.06           | 158.09         | 79.55            |                |                  | 1  |

# 30S ribosomal subunit protein S2 K115

## L<sup>Succ</sup>KDLETQSQDGTFDK

MS/MS Fragmentation of **LKDLETQSQDGTFDK**

Found in **gi|170079805**, 30S ribosomal subunit protein S2 [Escherichia coli str. K-12 s

Match to Query 13736: 1823.843294 from(912.928923,2+)

From data file xie021.dta

Click mouse within plot area to zoom in by factor of two about that point

Or,   to  Da

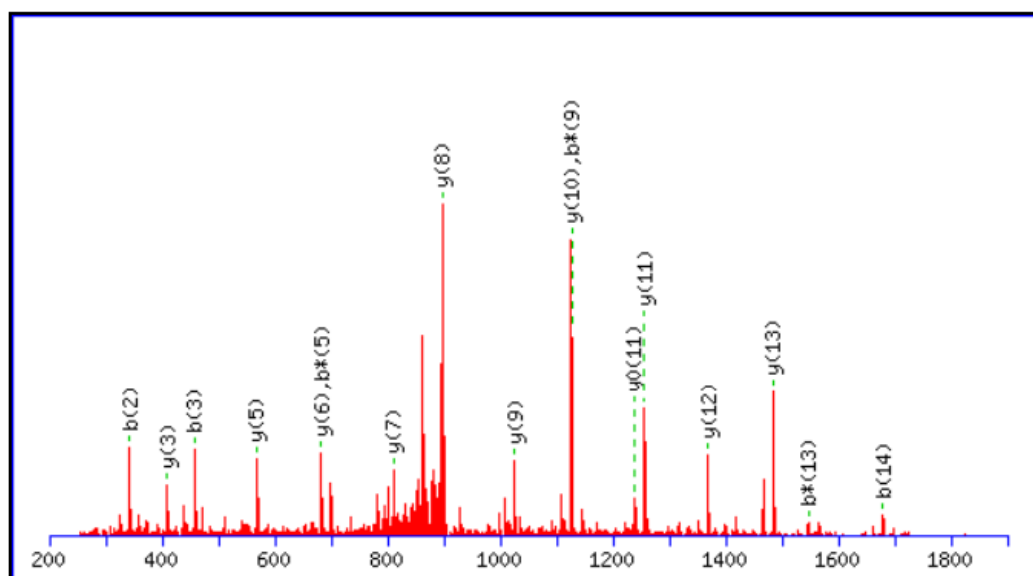

Monoisotopic mass of neutral peptide  $M_r(\text{calc})$ : 1823.84

Variable modifications:

K2 : Succinyl (K)

Ions Score: 78 Expect: 1.8e-006

| #  | b              | b <sup>++</sup> | b*             | b <sup>*++</sup> | b <sup>0</sup> | b <sup>0++</sup> | Seq. | y              | y <sup>++</sup> | y*      | y <sup>*++</sup> | y <sup>0</sup> | y <sup>0++</sup> | #  |
|----|----------------|-----------------|----------------|------------------|----------------|------------------|------|----------------|-----------------|---------|------------------|----------------|------------------|----|
| 1  | 114.09         | 57.55           |                |                  |                |                  | L    |                |                 |         |                  |                |                  | 15 |
| 2  | <b>342.20</b>  | 171.60          | 325.18         | 163.09           |                |                  | K    | 1711.77        | 856.39          | 1694.74 | 847.87           | 1693.76        | 847.38           | 14 |
| 3  | <b>457.23</b>  | 229.12          | 440.20         | 220.61           | 439.22         | 220.11           | D    | <b>1483.65</b> | 742.33          | 1466.63 | 733.82           | 1465.64        | 733.33           | 13 |
| 4  | 570.31         | 285.66          | 553.29         | 277.15           | 552.30         | 276.66           | L    | <b>1368.63</b> | 684.82          | 1351.60 | 676.30           | 1350.62        | 675.81           | 12 |
| 5  | 699.36         | 350.18          | <b>682.33</b>  | 341.67           | 681.35         | 341.18           | E    | <b>1255.54</b> | 628.28          | 1238.52 | 619.76           | <b>1237.53</b> | 619.27           | 11 |
| 6  | 800.40         | 400.71          | 783.38         | 392.19           | 782.39         | 391.70           | T    | <b>1126.50</b> | 563.75          | 1109.47 | 555.24           | 1108.49        | 554.75           | 10 |
| 7  | 928.46         | 464.73          | 911.44         | 456.22           | 910.45         | 455.73           | Q    | <b>1025.45</b> | 513.23          | 1008.43 | 504.72           | 1007.44        | 504.23           | 9  |
| 8  | 1015.49        | 508.25          | 998.47         | 499.74           | 997.48         | 499.25           | S    | <b>897.39</b>  | 449.20          | 880.37  | 440.69           | 879.38         | 440.20           | 8  |
| 9  | 1143.55        | 572.28          | <b>1126.53</b> | 563.77           | 1125.54        | 563.27           | Q    | <b>810.36</b>  | 405.69          | 793.34  | 397.17           | 792.35         | 396.68           | 7  |
| 10 | 1258.58        | 629.79          | 1241.55        | 621.28           | 1240.57        | 620.79           | D    | <b>682.30</b>  | 341.66          | 665.28  | 333.14           | 664.29         | 332.65           | 6  |
| 11 | 1315.60        | 658.30          | 1298.57        | 649.79           | 1297.59        | 649.30           | G    | <b>567.28</b>  | 284.14          | 550.25  | 275.63           | 549.27         | 275.14           | 5  |
| 12 | 1416.65        | 708.83          | 1399.62        | 700.31           | 1398.64        | 699.82           | T    | 510.26         | 255.63          | 493.23  | 247.12           | 492.25         | 246.63           | 4  |
| 13 | 1563.72        | 782.36          | <b>1546.69</b> | 773.85           | 1545.71        | 773.36           | F    | <b>409.21</b>  | 205.11          | 392.18  | 196.59           | 391.20         | 196.10           | 3  |
| 14 | <b>1678.74</b> | 839.88          | 1661.72        | 831.36           | 1660.73        | 830.87           | D    | 262.14         | 131.57          | 245.11  | 123.06           | 244.13         | 122.57           | 2  |
| 15 |                |                 |                |                  |                |                  | K    | 147.11         | 74.06           | 130.09  | 65.55            |                |                  | 1  |

# Cpn10 chaperonin GroES, small subunit of GroESL K34

## SAGGIVLTGSAAA<sup>Succ</sup>KSTR

MS/MS Fragmentation of **SAGGIVLTGSAAAKSTR**

Found in [gi170083591](#), Cpn10 chaperonin GroES, small subunit of GroESL [Escherich

Match to Query 11557: 1645.860994 from(823.937773,2+)

From data file xie021.dta

Click mouse within plot area to zoom in by factor of two about that point

Or,   to  Da

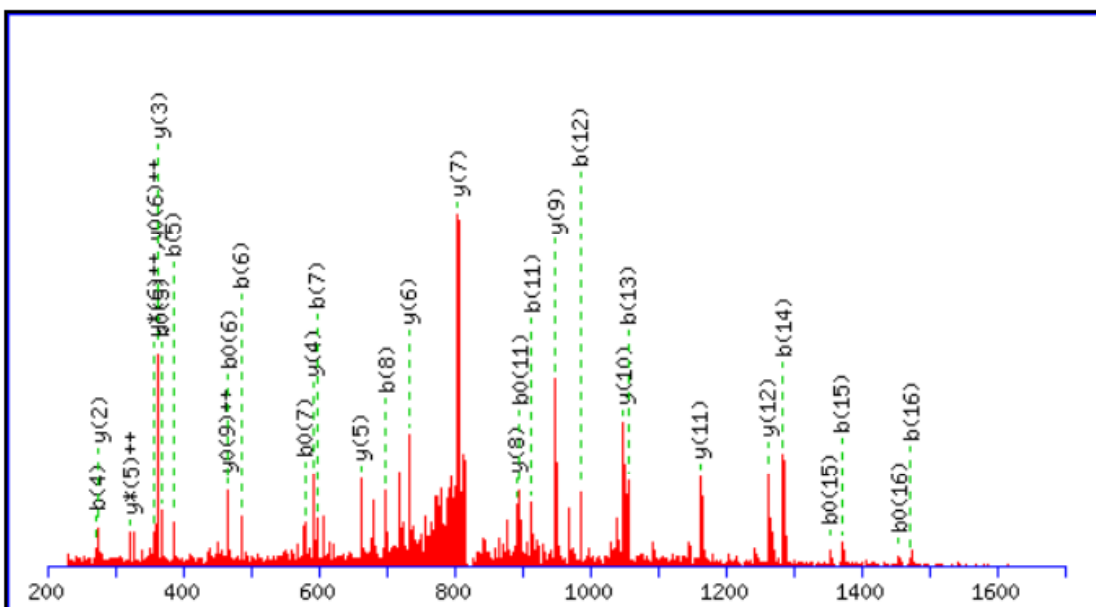

Monoisotopic mass of neutral peptide  $M_r(\text{calc})$ : 1645.86

Variable modifications:

K14 : Succinyl (K)

Ions Score: 68 Expect: 1.8e-005

| #  | b              | b <sup>++</sup> | b*      | b <sup>*++</sup> | b <sup>0</sup> | b <sup>0++</sup> | Seq. | y              | y <sup>++</sup> | y*      | y <sup>*++</sup> | y <sup>0</sup> | y <sup>0++</sup> | #  |
|----|----------------|-----------------|---------|------------------|----------------|------------------|------|----------------|-----------------|---------|------------------|----------------|------------------|----|
| 1  | 88.04          | 44.52           |         |                  | 70.03          | 35.52            | S    |                |                 |         |                  |                |                  | 17 |
| 2  | 159.08         | 80.04           |         |                  | 141.07         | 71.04            | A    | 1559.84        | 780.42          | 1542.81 | 771.91           | 1541.83        | 771.42           | 16 |
| 3  | 216.10         | 108.55          |         |                  | 198.09         | 99.55            | G    | 1488.80        | 744.90          | 1471.78 | 736.39           | 1470.79        | 735.90           | 15 |
| 4  | <b>273.12</b>  | 137.06          |         |                  | 255.11         | 128.06           | G    | 1431.78        | 716.39          | 1414.75 | 707.88           | 1413.77        | 707.39           | 14 |
| 5  | <b>386.20</b>  | 193.61          |         |                  | <b>368.19</b>  | 184.60           | I    | 1374.76        | 687.88          | 1357.73 | 679.37           | 1356.75        | 678.88           | 13 |
| 6  | <b>485.27</b>  | 243.14          |         |                  | <b>467.26</b>  | 234.13           | V    | <b>1261.67</b> | 631.34          | 1244.65 | 622.83           | 1243.66        | 622.34           | 12 |
| 7  | <b>598.36</b>  | 299.68          |         |                  | <b>580.35</b>  | 290.68           | L    | <b>1162.61</b> | 581.81          | 1145.58 | 573.29           | 1144.60        | 572.80           | 11 |
| 8  | <b>699.40</b>  | 350.21          |         |                  | 681.39         | 341.20           | T    | <b>1049.52</b> | 525.26          | 1032.50 | 516.75           | 1031.51        | 516.26           | 10 |
| 9  | 756.43         | 378.72          |         |                  | 738.41         | 369.71           | G    | <b>948.47</b>  | 474.74          | 931.45  | 466.23           | 930.46         | <b>465.74</b>    | 9  |
| 10 | 843.46         | 422.23          |         |                  | 825.45         | 413.23           | S    | <b>891.45</b>  | 446.23          | 874.43  | 437.72           | 873.44         | 437.22           | 8  |
| 11 | <b>914.49</b>  | 457.75          |         |                  | <b>896.48</b>  | 448.75           | A    | <b>804.42</b>  | 402.71          | 787.39  | 394.20           | 786.41         | 393.71           | 7  |
| 12 | <b>985.53</b>  | 493.27          |         |                  | 967.52         | 484.26           | A    | <b>733.38</b>  | 367.20          | 716.36  | <b>358.68</b>    | 715.37         | <b>358.19</b>    | 6  |
| 13 | <b>1056.57</b> | 528.79          |         |                  | 1038.56        | 519.78           | A    | <b>662.35</b>  | 331.68          | 645.32  | <b>323.16</b>    | 644.34         | 322.67           | 5  |
| 14 | <b>1284.68</b> | 642.84          | 1267.65 | 634.33           | 1266.67        | 633.84           | K    | <b>591.31</b>  | 296.16          | 574.28  | 287.65           | 573.30         | 287.15           | 4  |
| 15 | <b>1371.71</b> | 686.36          | 1354.68 | 677.85           | <b>1353.70</b> | 677.35           | S    | <b>363.20</b>  | 182.10          | 346.17  | 173.59           | 345.19         | 173.10           | 3  |
| 16 | <b>1472.76</b> | 736.88          | 1455.73 | 728.37           | <b>1454.75</b> | 727.88           | T    | <b>276.17</b>  | 138.59          | 259.14  | 130.07           | 258.16         | 129.58           | 2  |
| 17 |                |                 |         |                  |                |                  | R    | 175.12         | 88.06           | 158.09  | 79.55            |                |                  | 1  |

# 50S ribosomal subunit protein L9

K71

## AE<sup>Succ</sup>KINALETVTIASK

MS/MS Fragmentation of **AEKINALETVTIASK**

Found in [gi|170083648](#), 50S ribosomal subunit protein L9 [Escherichia coli str. K-12 su

Match to Query 6890: 1686.912144 from(844.463348,2+)

From data file zzh61.dta

Click mouse within plot area to zoom in by factor of two about that point

Or,   to  Da

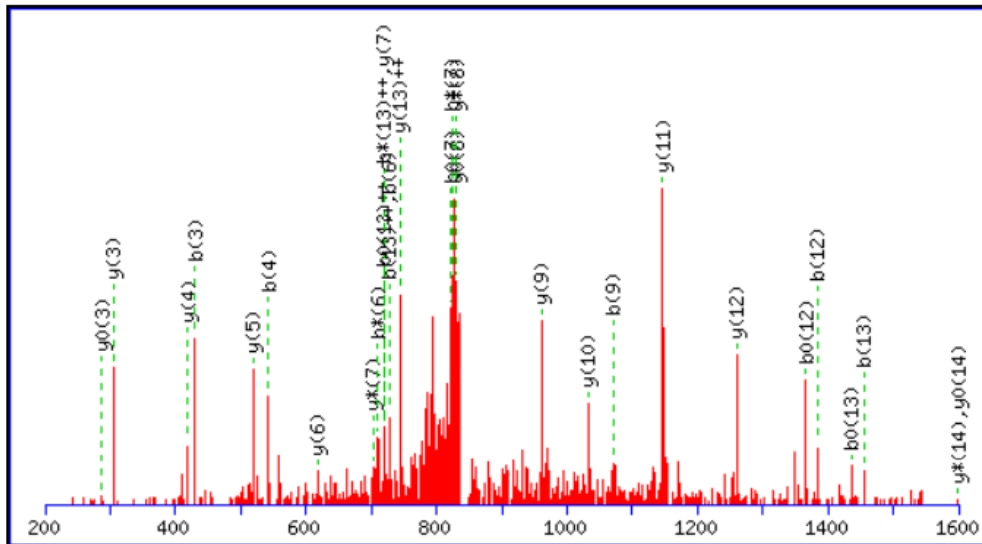

Monoisotopic mass of neutral peptide Mr(calc): 1686.90

Variable modifications:

K3 : Succinyl (K)

Ions Score: 59 Expect: 8.6e-005

| #  | b       | b <sup>++</sup> | b*      | b <sup>*++</sup> | b <sup>0</sup> | b <sup>0++</sup> | Seq. | y       | y <sup>++</sup> | y*      | y <sup>*++</sup> | y <sup>0</sup> | y <sup>0++</sup> | #  |
|----|---------|-----------------|---------|------------------|----------------|------------------|------|---------|-----------------|---------|------------------|----------------|------------------|----|
| 1  | 72.04   | 36.53           |         |                  |                |                  | A    |         |                 |         |                  |                |                  | 15 |
| 2  | 201.09  | 101.05          |         |                  | 183.08         | 92.04            | E    | 1616.87 | 808.94          | 1599.85 | 800.43           | 1598.86        | 799.94           | 14 |
| 3  | 429.20  | 215.10          | 412.17  | 206.59           | 411.19         | 206.10           | K    | 1487.83 | 744.42          | 1470.80 | 735.91           | 1469.82        | 735.41           | 13 |
| 4  | 542.28  | 271.64          | 525.26  | 263.13           | 524.27         | 262.64           | I    | 1259.72 | 630.36          | 1242.69 | 621.85           | 1241.71        | 621.36           | 12 |
| 5  | 656.32  | 328.67          | 639.30  | 320.15           | 638.31         | 319.66           | N    | 1146.64 | 573.82          | 1129.61 | 565.31           | 1128.63        | 564.82           | 11 |
| 6  | 727.36  | 364.18          | 710.34  | 355.67           | 709.35         | 355.18           | A    | 1032.59 | 516.80          | 1015.57 | 508.29           | 1014.58        | 507.80           | 10 |
| 7  | 840.45  | 420.73          | 823.42  | 412.21           | 822.44         | 411.72           | L    | 961.56  | 481.28          | 944.53  | 472.77           | 943.55         | 472.28           | 9  |
| 8  | 969.49  | 485.25          | 952.46  | 476.73           | 951.48         | 476.24           | E    | 848.47  | 424.74          | 831.45  | 416.23           | 830.46         | 415.73           | 8  |
| 9  | 1070.54 | 535.77          | 1053.51 | 527.26           | 1052.53        | 526.77           | T    | 719.43  | 360.22          | 702.40  | 351.71           | 701.42         | 351.21           | 7  |
| 10 | 1169.60 | 585.31          | 1152.58 | 576.79           | 1151.59        | 576.30           | V    | 618.38  | 309.69          | 601.36  | 301.18           | 600.37         | 300.69           | 6  |
| 11 | 1270.65 | 635.83          | 1253.63 | 627.32           | 1252.64        | 626.82           | T    | 519.31  | 260.16          | 502.29  | 251.65           | 501.30         | 251.16           | 5  |
| 12 | 1383.74 | 692.37          | 1366.71 | 683.86           | 1365.73        | 683.37           | I    | 418.27  | 209.64          | 401.24  | 201.12           | 400.26         | 200.63           | 4  |
| 13 | 1454.77 | 727.89          | 1437.75 | 719.38           | 1436.76        | 718.89           | A    | 305.18  | 153.09          | 288.16  | 144.58           | 287.17         | 144.09           | 3  |
| 14 | 1541.81 | 771.41          | 1524.78 | 762.89           | 1523.80        | 762.40           | S    | 234.14  | 117.58          | 217.12  | 109.06           | 216.13         | 108.57           | 2  |
| 15 |         |                 |         |                  |                |                  | K    | 147.11  | 74.06           | 130.09  | 65.55            |                |                  | 1  |



INALETVTIAS<sup>Succ</sup>KAGDEGKMS/MS Fragmentation of **INALETVTIASKAGDEGK**Found in **gi|170083648**, 50S ribosomal subunit protein L9 [Escherichia coli str. K-12 s

Match to Query 14619: 1915.971714 from(958.993133,2+)

From data file xie021.dta

Click mouse within plot area to zoom in by factor of two about that point

Or, Plot from  to  Da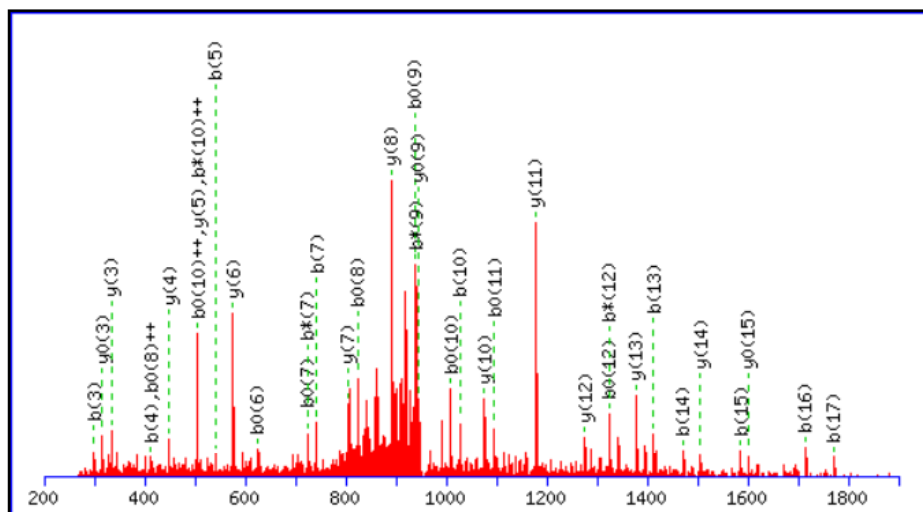

Monoisotopic mass of neutral peptide Mr(calc): 1915.97

Variable modifications:

K12 : Succinyl (K)

Ions Score: 73 Expect: 6.1e-006

| #  | b              | b <sup>++</sup> | b*             | b <sup>*++</sup> | b <sup>0</sup> | b <sup>0++</sup> | Seq. | y              | y <sup>++</sup> | y*      | y <sup>*++</sup> | y <sup>0</sup> | y <sup>0++</sup> | #  |
|----|----------------|-----------------|----------------|------------------|----------------|------------------|------|----------------|-----------------|---------|------------------|----------------|------------------|----|
| 1  | 114.09         | 57.55           |                |                  |                |                  | I    |                |                 |         |                  |                |                  | 18 |
| 2  | 228.13         | 114.57          | 211.11         | 106.06           |                |                  | N    | 1803.90        | 902.45          | 1786.87 | 893.94           | 1785.89        | 893.45           | 17 |
| 3  | <b>299.17</b>  | 150.09          | 282.14         | 141.58           |                |                  | A    | 1689.85        | 845.43          | 1672.83 | 836.92           | 1671.84        | 836.43           | 16 |
| 4  | <b>412.26</b>  | 206.63          | 395.23         | 198.12           |                |                  | L    | 1618.82        | 809.91          | 1601.79 | 801.40           | <b>1600.81</b> | 800.91           | 15 |
| 5  | <b>541.30</b>  | 271.15          | 524.27         | 262.64           | 523.29         | 262.15           | E    | <b>1505.73</b> | 753.37          | 1488.71 | 744.86           | 1487.72        | 744.36           | 14 |
| 6  | 642.35         | 321.68          | 625.32         | 313.16           | <b>624.34</b>  | 312.67           | T    | <b>1376.69</b> | 688.85          | 1359.66 | 680.34           | 1358.68        | 679.84           | 13 |
| 7  | <b>741.41</b>  | 371.21          | <b>724.39</b>  | 362.70           | <b>723.40</b>  | 362.21           | V    | <b>1275.64</b> | 638.32          | 1258.62 | 629.81           | 1257.63        | 629.32           | 12 |
| 8  | 842.46         | 421.73          | 825.44         | 413.22           | <b>824.45</b>  | <b>412.73</b>    | T    | <b>1176.57</b> | 588.79          | 1159.55 | 580.28           | 1158.56        | 579.79           | 11 |
| 9  | 955.55         | 478.28          | <b>938.52</b>  | 469.76           | <b>937.54</b>  | 469.27           | I    | <b>1075.53</b> | 538.27          | 1058.50 | 529.75           | 1057.52        | 529.26           | 10 |
| 10 | <b>1026.58</b> | 513.80          | 1009.56        | <b>505.28</b>    | <b>1008.57</b> | <b>504.79</b>    | A    | 962.44         | 481.72          | 945.42  | 473.21           | <b>944.43</b>  | 472.72           | 9  |
| 11 | 1113.61        | 557.31          | 1096.59        | 548.80           | <b>1095.60</b> | 548.31           | S    | <b>891.41</b>  | 446.21          | 874.38  | 437.69           | 873.39         | 437.20           | 8  |
| 12 | 1341.73        | 671.37          | <b>1324.70</b> | 662.85           | <b>1323.72</b> | 662.36           | K    | <b>804.37</b>  | 402.69          | 787.35  | 394.18           | 786.36         | 393.69           | 7  |
| 13 | <b>1412.76</b> | 706.89          | 1395.74        | 698.37           | 1394.75        | 697.88           | A    | <b>576.26</b>  | 288.63          | 559.24  | 280.12           | 558.25         | 279.63           | 6  |
| 14 | <b>1469.78</b> | 735.40          | 1452.76        | 726.88           | 1451.77        | 726.39           | G    | <b>505.23</b>  | 253.12          | 488.20  | 244.60           | 487.21         | 244.11           | 5  |
| 15 | <b>1584.81</b> | 792.91          | 1567.78        | 784.40           | 1566.80        | 783.90           | D    | <b>448.20</b>  | 224.61          | 431.18  | 216.09           | 430.19         | 215.60           | 4  |
| 16 | <b>1713.85</b> | 857.43          | 1696.83        | 848.92           | 1695.84        | 848.43           | E    | <b>333.18</b>  | 167.09          | 316.15  | 158.58           | <b>315.17</b>  | 158.09           | 3  |
| 17 | <b>1770.88</b> | 885.94          | 1753.85        | 877.43           | 1752.87        | 876.94           | G    | 204.13         | 102.57          | 187.11  | 94.06            |                |                  | 2  |
| 18 |                |                 |                |                  |                |                  | K    | 147.11         | 74.06           | 130.09  | 65.55            |                |                  | 1  |

# 50S ribosomal subunit protein L9

K112

## DIADAVTAAGVEVA<sup>Succ</sup>KSEVR

MS/MS Fragmentation of **DIADAVTAAGVEVAKSEVR**

Found in **gi170083648**, 50S ribosomal subunit protein L9 [Escherichia coli str. K-12 su

Match to Query 15099: 2000.010093 from(667.677307,3+)

From data file xie021.dta

Click mouse within plot area to zoom in by factor of two about that point

Or,   to  Da

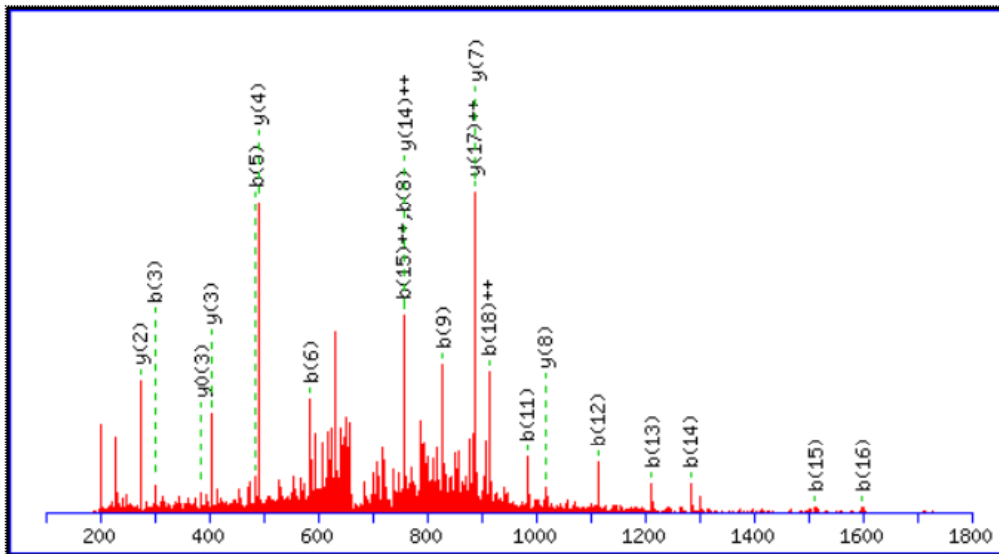

Monoisotopic mass of neutral peptide  $M_r(\text{calc})$ : 2000.01

Variable modifications:

K15 : Succinyl (K)

Ions Score: 59 Expect: 0.00017

| #  | b              | b <sup>++</sup> | b <sup>*</sup> | b <sup>*++</sup> | b <sup>0</sup> | b <sup>0++</sup> | Seq. | y              | y <sup>++</sup> | y <sup>*</sup> | y <sup>*++</sup> | y <sup>0</sup> | y <sup>0++</sup> | #  |
|----|----------------|-----------------|----------------|------------------|----------------|------------------|------|----------------|-----------------|----------------|------------------|----------------|------------------|----|
| 1  | 116.03         | 58.52           |                |                  | 98.02          | 49.52            | D    |                |                 |                |                  |                |                  | 19 |
| 2  | 229.12         | 115.06          |                |                  | 211.11         | 106.06           | I    | 1885.99        | 943.50          | 1868.96        | 934.98           | 1867.98        | 934.49           | 18 |
| 3  | <b>300.16</b>  | 150.58          |                |                  | 282.14         | 141.58           | A    | 1772.90        | <b>886.95</b>   | 1755.88        | 878.44           | 1754.89        | 877.95           | 17 |
| 4  | 415.18         | 208.09          |                |                  | 397.17         | 199.09           | D    | 1701.87        | 851.44          | 1684.84        | 842.92           | 1683.85        | 842.43           | 16 |
| 5  | <b>486.22</b>  | 243.61          |                |                  | 468.21         | 234.61           | A    | 1586.84        | 793.92          | 1569.81        | 785.41           | 1568.83        | 784.92           | 15 |
| 6  | <b>585.29</b>  | 293.15          |                |                  | 567.28         | 284.14           | V    | 1515.80        | <b>758.40</b>   | 1498.77        | 749.89           | 1497.79        | 749.40           | 14 |
| 7  | 686.34         | 343.67          |                |                  | 668.32         | 334.67           | T    | 1416.73        | 708.87          | 1399.71        | 700.36           | 1398.72        | 699.86           | 13 |
| 8  | <b>757.37</b>  | 379.19          |                |                  | 739.36         | 370.18           | A    | 1315.69        | 658.35          | 1298.66        | 649.83           | 1297.67        | 649.34           | 12 |
| 9  | <b>828.41</b>  | 414.71          |                |                  | 810.40         | 405.70           | A    | 1244.65        | 622.83          | 1227.62        | 614.31           | 1226.64        | 613.82           | 11 |
| 10 | 885.43         | 443.22          |                |                  | 867.42         | 434.21           | G    | 1173.61        | 587.31          | 1156.58        | 578.80           | 1155.60        | 578.30           | 10 |
| 11 | <b>984.50</b>  | 492.75          |                |                  | 966.49         | 483.75           | V    | 1116.59        | 558.80          | 1099.56        | 550.29           | 1098.58        | 549.79           | 9  |
| 12 | <b>1113.54</b> | 557.27          |                |                  | 1095.53        | 548.27           | E    | <b>1017.52</b> | 509.26          | 1000.49        | 500.75           | 999.51         | 500.26           | 8  |
| 13 | <b>1212.61</b> | 606.81          |                |                  | 1194.60        | 597.80           | V    | <b>888.48</b>  | 444.74          | 871.45         | 436.23           | 870.47         | 435.74           | 7  |
| 14 | <b>1283.65</b> | 642.33          |                |                  | 1265.64        | 633.32           | A    | 789.41         | 395.21          | 772.38         | 386.70           | 771.40         | 386.20           | 6  |
| 15 | <b>1511.76</b> | <b>756.38</b>   | 1494.73        | 747.87           | 1493.75        | 747.38           | K    | 718.37         | 359.69          | 701.35         | 351.18           | 700.36         | 350.68           | 5  |
| 16 | <b>1598.79</b> | 799.90          | 1581.76        | 791.39           | 1580.78        | 790.89           | S    | <b>490.26</b>  | 245.63          | 473.24         | 237.12           | 472.25         | 236.63           | 4  |
| 17 | 1727.83        | 864.42          | 1710.81        | 855.91           | 1709.82        | 855.42           | E    | <b>403.23</b>  | 202.12          | 386.20         | 193.61           | <b>385.22</b>  | 193.11           | 3  |
| 18 | 1826.90        | <b>913.95</b>   | 1809.88        | 905.44           | 1808.89        | 904.95           | V    | <b>274.19</b>  | 137.60          | 257.16         | 129.08           |                |                  | 2  |
| 19 |                |                 |                |                  |                |                  | R    | 175.12         | 88.06           | 158.09         | 79.55            |                |                  | 1  |
